# Supplementary material
Source: PubMed Central journal article supplement (PMC7524275)
Supplement: KGMI_A_1737487_SM2894.pdf [file KGMI_A_1737487_SM2894.pdf]

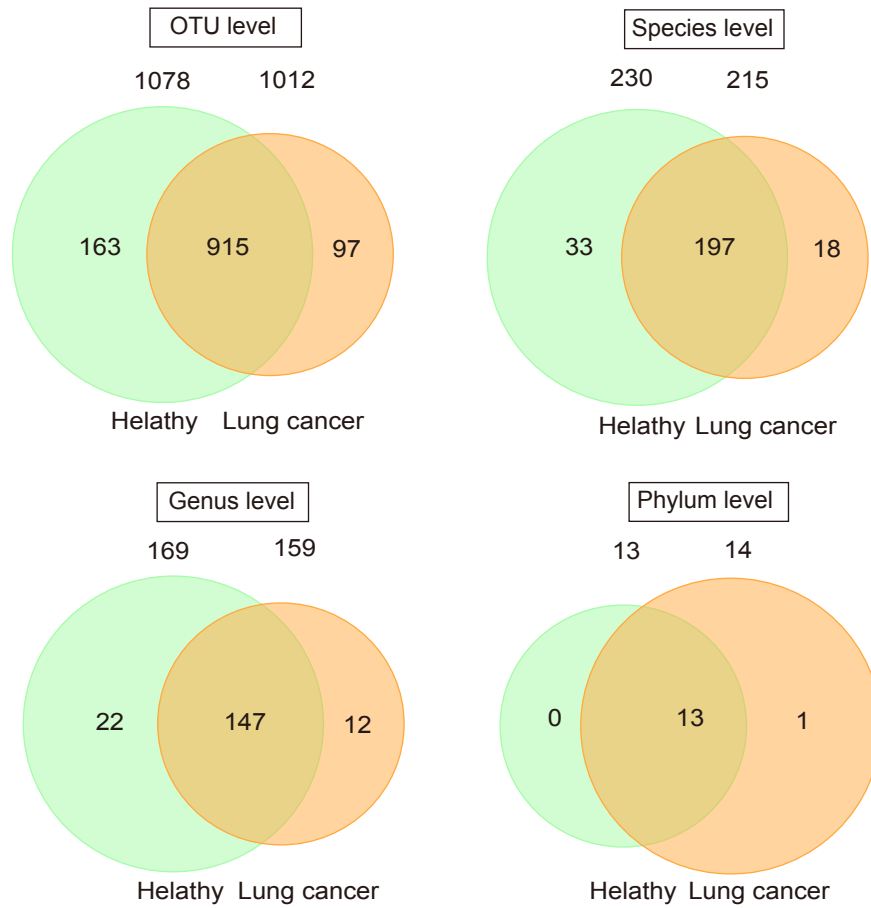

**Figure S1 The unique numbers of phylotypes in lung cancer group and healthy group.** Venn diagrams showed the numbers of microbiota commonly shared in both lung cancer group (n=42) and healthy group (n=65), and the numbers of unique microbiota in either healthy (green) or patient group (orange).

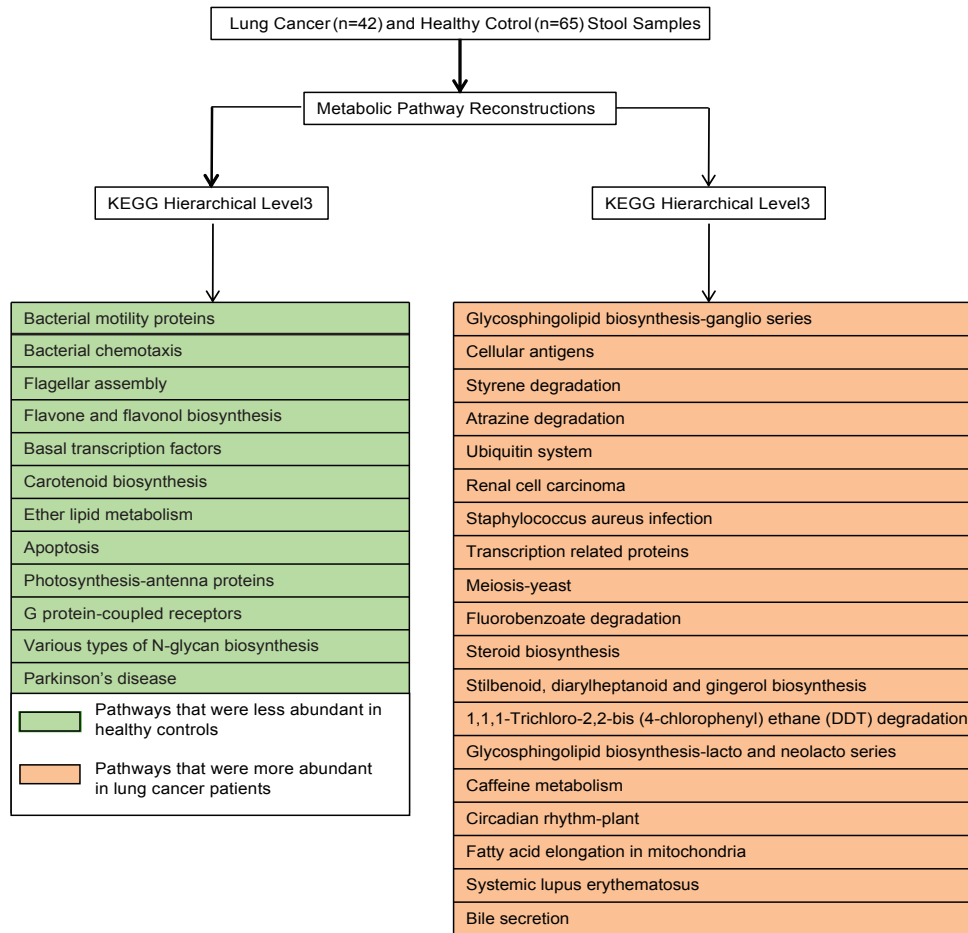

**Figure S2 Thirty-one microbial metabolic pathways.** The abundance ratio of these pathways between the lung cancer group and the healthy group was at least 1.2 folds. Tests were conducted at KEGG hierarchical level 3. Twelve pathways were less abundant in lung cancer group (green), and nineteen pathways were more abundant in lung cancer group (orange).

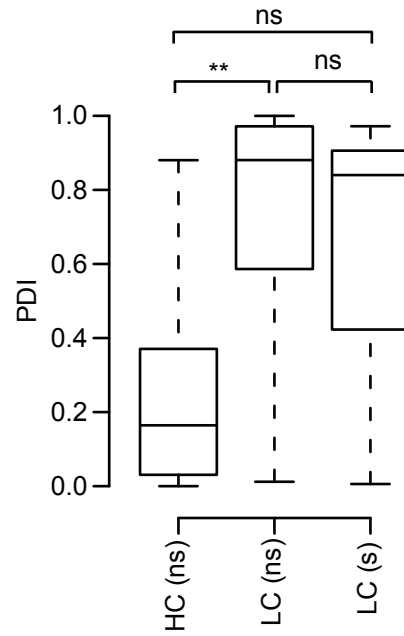

\*\* p = 4.2e-13

**Figure S3 PDI for patients with smoking history.** The control group (HC, ns) and non-smoking patients (LC, ns) were used for comparison. ns, not significant. \*\* p<0.01.

**Table S1 Baseline characteristics of the validation cohort**

|                                    | Patients with Lung Cancer<br>(n=34) | Healthy Control<br>(n=40) | P value* |
|------------------------------------|-------------------------------------|---------------------------|----------|
| Demographics/Anthropometric        |                                     |                           |          |
| Age yr (mean±SD)                   | 58.50±8.51                          | 57.95±12.34               | 0.83     |
| Male/female (No.)                  | 16/18                               | 22/8                      | 0.64     |
| BMI (kg/m <sup>2</sup> ) (mean±SD) | 24.24±3.32                          | 23.85±3.17                | 0.61     |
| Tumor Stage (%)                    |                                     |                           |          |
| 0                                  | 4 (11.76%)                          | N/A                       |          |
| I                                  | 26 (76.47%)                         |                           |          |
| II                                 | 1 (2.94%)                           |                           |          |
| III                                | 3 (8.82%)                           |                           |          |
| Tumor Type (%)                     |                                     |                           |          |
| ADC                                | 29 (85.29%)                         | N/A                       |          |
| SCC                                | 4 (11.76%)                          |                           |          |
| LCC                                | 1 (2.94%)                           |                           |          |
| Tumor Metastasis (%)               |                                     |                           |          |
| Metastasis                         | 4 (11.76%)                          | N/A                       |          |
| Non -metastasis                    | 30 (88.24%)                         |                           |          |
| Smoking Status (%)                 |                                     |                           |          |
| Never smoker                       | 32 (94.12%)                         | N/I                       |          |
| Ever smoker                        | 2 (5.88%)                           |                           |          |

\*Unpaired t-test was used to compare age and BMI between lung cancer group and healthy group; Fisher's exact test was used to compare gender distribution between two groups. N/A, not applicable; N/I, no information.

**Table S2-1 Discovery cohort sequencing data statistics**

| Sample Info | Seq_num | Base_num | Mean_length | Min_length | Max_length |
|-------------|---------|----------|-------------|------------|------------|
| 1           | 50336   | 50336    | 433.1195168 | 358        | 358        |
| 2           | 46688   | 46688    | 435.4799306 | 305        | 305        |
| 3           | 45115   | 45115    | 439.8088662 | 292        | 292        |
| 4           | 43171   | 43171    | 432.9764657 | 358        | 358        |
| 5           | 46876   | 46876    | 434.5235302 | 382        | 382        |
| 6           | 43544   | 43544    | 438.4845444 | 389        | 389        |
| 7           | 47270   | 47270    | 436.4754178 | 273        | 273        |
| 8           | 42233   | 42233    | 441.2860086 | 305        | 305        |
| 9           | 51106   | 51106    | 434.0883458 | 338        | 338        |
| 10          | 47803   | 47803    | 437.2942075 | 268        | 268        |
| 11          | 48650   | 48650    | 438.407297  | 349        | 349        |
| 12          | 44016   | 44016    | 437.9805752 | 268        | 268        |
| 13          | 42923   | 42923    | 435.3217622 | 381        | 381        |
| 14          | 48444   | 48444    | 435.3863017 | 358        | 358        |
| 15          | 39640   | 39640    | 438.1869072 | 340        | 340        |
| 16          | 50099   | 50099    | 434.9543903 | 329        | 329        |
| 17          | 40921   | 40921    | 439.0092373 | 269        | 269        |
| 18          | 43248   | 43248    | 440.5267296 | 329        | 329        |
| 19          | 39394   | 39394    | 435.9785246 | 353        | 353        |
| 20          | 42805   | 42805    | 437.3550053 | 358        | 358        |
| 21          | 41260   | 41260    | 438.2982792 | 283        | 283        |
| 22          | 39591   | 39591    | 436.3531358 | 359        | 359        |
| 23          | 38959   | 38959    | 436.630278  | 319        | 319        |
| 24          | 48698   | 48698    | 431.7577313 | 384        | 384        |
| 25          | 40071   | 40071    | 438.8198448 | 393        | 393        |
| 26          | 49970   | 49970    | 434.6361617 | 305        | 305        |
| 27          | 44687   | 44687    | 439.4254257 | 358        | 358        |
| 28          | 45197   | 45197    | 437.1599664 | 417        | 417        |
| 29          | 40919   | 40919    | 442.9331118 | 344        | 344        |
| 30          | 46660   | 46660    | 436.8386412 | 292        | 292        |
| 31          | 40384   | 40384    | 440.9845731 | 417        | 417        |
| 32          | 40805   | 40805    | 441.5544174 | 358        | 358        |
| 33          | 47064   | 47064    | 434.2133265 | 364        | 364        |
| 34          | 47242   | 47242    | 439.5637357 | 365        | 365        |
| 35          | 43346   | 43346    | 437.4014442 | 397        | 397        |
| 36          | 42377   | 42377    | 430.4245463 | 380        | 380        |
| 37          | 43465   | 43465    | 437.2899114 | 358        | 358        |
| 38          | 47593   | 47593    | 434.4348329 | 338        | 338        |
| 39          | 46108   | 46108    | 436.2409343 | 338        | 338        |
| 40          | 42819   | 42819    | 439.0898199 | 275        | 275        |
| 41          | 47997   | 47997    | 440.6780007 | 358        | 358        |

---

|    |       |       |             |     |     |
|----|-------|-------|-------------|-----|-----|
| 42 | 44884 | 44884 | 440.5217227 | 273 | 273 |
| 43 | 48360 | 48360 | 435.8109801 | 358 | 358 |
| 44 | 57841 | 57841 | 434.8955758 | 406 | 406 |
| 45 | 58595 | 58595 | 433.8205649 | 274 | 274 |
| 46 | 52546 | 52546 | 431.2591063 | 283 | 283 |
| 47 | 46838 | 46838 | 434.6140954 | 268 | 268 |
| 48 | 45645 | 45645 | 435.007865  | 340 | 340 |
| 49 | 44543 | 44543 | 435.3268078 | 358 | 358 |
| 50 | 53915 | 53915 | 429.9120838 | 358 | 358 |
| 51 | 50417 | 50417 | 430.9870679 | 418 | 418 |
| 52 | 44691 | 44691 | 435.6546061 | 279 | 279 |
| 53 | 49740 | 49740 | 438.1997587 | 364 | 364 |
| 54 | 48926 | 48926 | 434.715734  | 275 | 275 |
| 55 | 46151 | 46151 | 430.7675457 | 358 | 358 |
| 56 | 45231 | 45231 | 440.3372024 | 271 | 271 |
| 57 | 47514 | 47514 | 434.7353201 | 341 | 341 |
| 58 | 46995 | 46995 | 436.4568146 | 417 | 417 |
| 59 | 44550 | 44550 | 437.7556229 | 359 | 359 |
| 60 | 45411 | 45411 | 432.7261897 | 279 | 279 |
| 61 | 43887 | 43887 | 433.2606467 | 388 | 388 |
| 62 | 49007 | 49007 | 439.3964332 | 305 | 305 |
| 63 | 37036 | 37036 | 437.4796144 | 415 | 415 |
| 64 | 42934 | 42934 | 428.6321098 | 280 | 280 |
| 65 | 43301 | 43301 | 434.3071292 | 394 | 394 |
| 66 | 49320 | 49320 | 435.4063463 | 418 | 418 |
| 67 | 42568 | 42568 | 440.7569087 | 417 | 417 |
| 68 | 60056 | 60056 | 442.6206874 | 323 | 323 |
| 69 | 53312 | 53312 | 445.4607781 | 394 | 394 |
| 70 | 57416 | 57416 | 441.7565139 | 358 | 358 |
| 71 | 52461 | 52461 | 435.7023694 | 416 | 416 |
| 72 | 60971 | 60971 | 436.388775  | 334 | 334 |
| 73 | 59527 | 59527 | 437.6228098 | 346 | 346 |
| 74 | 59561 | 59561 | 433.1899901 | 358 | 358 |
| 75 | 64685 | 64685 | 433.9337095 | 417 | 417 |
| 76 | 58271 | 58271 | 430.7283211 | 407 | 407 |
| 77 | 63643 | 63643 | 438.6733184 | 358 | 358 |
| 78 | 62710 | 62710 | 439.4627811 | 340 | 340 |
| 79 | 65170 | 65170 | 433.2601197 | 358 | 358 |
| 80 | 55724 | 55724 | 440.4086928 | 331 | 331 |
| 81 | 59302 | 59302 | 438.747361  | 365 | 365 |
| 82 | 60920 | 60920 | 441.4975378 | 357 | 357 |
| 83 | 61389 | 61389 | 436.1801137 | 366 | 366 |
| 84 | 60502 | 60502 | 434.9285974 | 346 | 346 |

---

|     |       |       |             |     |     |
|-----|-------|-------|-------------|-----|-----|
| 85  | 58582 | 58582 | 438.1238606 | 312 | 312 |
| 86  | 54660 | 54660 | 437.5046103 | 290 | 290 |
| 87  | 65261 | 65261 | 438.7488393 | 346 | 346 |
| 88  | 59959 | 59959 | 438.4947047 | 390 | 390 |
| 89  | 72175 | 72175 | 435.5051195 | 358 | 358 |
| 90  | 49831 | 49831 | 434.7951275 | 358 | 358 |
| 91  | 59811 | 59811 | 432.4325626 | 318 | 318 |
| 92  | 48464 | 48464 | 438.4193628 | 358 | 358 |
| 93  | 51392 | 51392 | 431.986963  | 338 | 338 |
| 94  | 58744 | 58744 | 427.8925337 | 273 | 273 |
| 95  | 56833 | 56833 | 433.2174703 | 385 | 385 |
| 96  | 48777 | 48777 | 431.6351764 | 403 | 403 |
| 97  | 55191 | 55191 | 438.3097063 | 417 | 417 |
| 98  | 57382 | 57382 | 431.0498414 | 347 | 347 |
| 99  | 54595 | 54595 | 435.7523949 | 415 | 415 |
| 100 | 54681 | 54681 | 440.2151387 | 280 | 280 |
| 101 | 59095 | 59095 | 438.9374059 | 357 | 357 |
| 102 | 61082 | 61082 | 435.620903  | 322 | 322 |
| 103 | 60430 | 60430 | 440.0438193 | 338 | 338 |
| 104 | 56859 | 56859 | 431.3572522 | 405 | 405 |
| 105 | 60994 | 60994 | 431.6354887 | 305 | 305 |
| 106 | 59535 | 59535 | 429.1837407 | 338 | 338 |
| 107 | 63140 | 63140 | 428.9844314 | 358 | 358 |

No 1-42: Lung cancer samples

No 43-107: Healthy control samples

**Table S2-2 Discovery cohort sequencing data statistics**

| Sample Info | Seq_num | Base_num | Mean_length | Min_length | Max_length |
|-------------|---------|----------|-------------|------------|------------|
| 1           | 33376   | 14516750 | 434.9457694 | 413        | 452        |
| 2           | 31905   | 13992473 | 438.5667764 | 422        | 452        |
| 3           | 30813   | 13347580 | 433.1801512 | 358        | 451        |
| 4           | 32610   | 14233442 | 436.4747623 | 358        | 452        |
| 5           | 30093   | 13053272 | 433.764397  | 365        | 452        |
| 6           | 30672   | 13398872 | 436.8437663 | 358        | 454        |
| 7           | 31198   | 13634900 | 437.0440413 | 358        | 452        |
| 8           | 36527   | 15874130 | 434.5861965 | 419        | 451        |
| 9           | 33716   | 14554674 | 431.6844821 | 419        | 452        |
| 10          | 32553   | 14261846 | 438.1115719 | 358        | 452        |
| 11          | 32061   | 14018893 | 437.2568853 | 419        | 457        |
| 12          | 39368   | 17309962 | 439.6962508 | 358        | 452        |
| 13          | 38647   | 16712193 | 432.4318317 | 358        | 468        |
| 14          | 37382   | 16339559 | 437.0969718 | 322        | 452        |
| 15          | 37541   | 16570084 | 441.3863243 | 380        | 452        |

---

|    |       |          |             |     |     |
|----|-------|----------|-------------|-----|-----|
| 16 | 44511 | 19523772 | 438.6280245 | 419 | 453 |
| 17 | 44029 | 19410273 | 440.8520066 | 358 | 452 |
| 18 | 42056 | 18406998 | 437.6792961 | 418 | 485 |
| 19 | 40017 | 17281917 | 431.8643826 | 407 | 451 |
| 20 | 30944 | 13542173 | 437.6348565 | 417 | 451 |
| 21 | 30726 | 13281484 | 432.255549  | 311 | 451 |
| 22 | 31351 | 13643346 | 435.1805684 | 358 | 453 |
| 23 | 42980 | 18803344 | 437.4905537 | 358 | 452 |
| 24 | 42825 | 18741866 | 437.6384355 | 422 | 452 |
| 25 | 39910 | 17541226 | 439.519569  | 410 | 453 |
| 26 | 40896 | 17860426 | 436.7279441 | 407 | 452 |
| 27 | 44732 | 19333618 | 432.2100063 | 339 | 475 |
| 28 | 36463 | 15995443 | 438.6760003 | 356 | 452 |
| 29 | 33213 | 14472552 | 435.7496161 | 419 | 452 |
| 30 | 44467 | 19162524 | 430.9380889 | 305 | 452 |
| 31 | 43870 | 19261810 | 439.0656485 | 340 | 452 |
| 32 | 33400 | 14600044 | 437.1270659 | 406 | 452 |
| 33 | 42633 | 18759480 | 440.0225178 | 358 | 454 |
| 34 | 32168 | 14024493 | 435.9765295 | 324 | 453 |
| 35 | 32263 | 13955388 | 432.5508477 | 327 | 452 |
| 36 | 34128 | 14837528 | 434.7611346 | 389 | 451 |
| 37 | 39023 | 16949177 | 434.3381339 | 340 | 452 |
| 38 | 31642 | 13885515 | 438.8317742 | 418 | 452 |
| 39 | 30166 | 13208533 | 437.8615992 | 390 | 471 |
| 40 | 43197 | 18804162 | 435.3117578 | 419 | 465 |
| 41 | 43692 | 18975300 | 434.2968965 | 286 | 453 |
| 42 | 34811 | 14982123 | 430.3847371 | 310 | 453 |
| 43 | 37583 | 16159493 | 429.9681505 | 319 | 451 |
| 44 | 36556 | 15978790 | 437.1044425 | 341 | 453 |
| 45 | 41284 | 17868116 | 432.8097084 | 331 | 497 |
| 46 | 33981 | 14836087 | 436.5994821 | 347 | 452 |
| 47 | 31326 | 13745071 | 438.7751708 | 273 | 453 |
| 48 | 32561 | 14103561 | 433.1427475 | 273 | 529 |
| 49 | 41628 | 18522800 | 444.960123  | 421 | 452 |
| 50 | 38281 | 16652618 | 435.010005  | 397 | 452 |
| 51 | 36238 | 15695481 | 433.1221646 | 407 | 474 |
| 52 | 33553 | 14866761 | 443.0829136 | 313 | 458 |
| 53 | 34869 | 15149255 | 434.4619863 | 366 | 453 |
| 54 | 39853 | 17180938 | 431.1077711 | 417 | 457 |
| 55 | 39804 | 17290260 | 434.3849864 | 279 | 452 |
| 56 | 44361 | 19064539 | 429.759     | 377 | 451 |
| 57 | 38078 | 16264147 | 427.1271338 | 393 | 452 |
| 58 | 30664 | 13332720 | 434.8004174 | 366 | 452 |

---



---

|    |       |          |             |     |     |
|----|-------|----------|-------------|-----|-----|
| 59 | 44567 | 19045364 | 427.3422936 | 389 | 452 |
| 60 | 42652 | 18358811 | 430.432594  | 323 | 463 |
| 61 | 41412 | 17861864 | 431.3209698 | 389 | 453 |
| 62 | 44984 | 19476475 | 432.9644985 | 339 | 486 |
| 63 | 41162 | 17741030 | 431.0050532 | 385 | 453 |
| 64 | 32570 | 13921075 | 427.4201719 | 340 | 463 |
| 65 | 39873 | 17125181 | 429.4931658 | 363 | 452 |
| 66 | 41574 | 17931715 | 431.3204166 | 292 | 452 |
| 67 | 32614 | 14038354 | 430.4395045 | 283 | 476 |
| 68 | 43917 | 19256868 | 438.4832297 | 365 | 487 |
| 69 | 38654 | 16584381 | 429.046955  | 366 | 451 |
| 70 | 35262 | 15334971 | 434.8854918 | 403 | 453 |
| 71 | 42909 | 18557578 | 432.4868443 | 324 | 452 |
| 72 | 30989 | 13302068 | 429.2512827 | 396 | 451 |
| 73 | 42686 | 18597920 | 435.6913274 | 358 | 455 |
| 74 | 41030 | 18120919 | 441.6504753 | 356 | 452 |

---

No 1-34: Lung cancer samples

No 35-74: Healthy control samples

**Table S3 The unique microbiota of phlotypes in lung cancer group and healthy group**

| Phylotype | Group (number)        | List                                                                                                                                                                                                                                                                                                                                                                                                                                                                                                                                                                                                                                                                                                                                                                                                                                                                                                                                                                                                                                                                                                                                                                                                                                                                                                                                                                                                                      |
|-----------|-----------------------|---------------------------------------------------------------------------------------------------------------------------------------------------------------------------------------------------------------------------------------------------------------------------------------------------------------------------------------------------------------------------------------------------------------------------------------------------------------------------------------------------------------------------------------------------------------------------------------------------------------------------------------------------------------------------------------------------------------------------------------------------------------------------------------------------------------------------------------------------------------------------------------------------------------------------------------------------------------------------------------------------------------------------------------------------------------------------------------------------------------------------------------------------------------------------------------------------------------------------------------------------------------------------------------------------------------------------------------------------------------------------------------------------------------------------|
| OTU       | Healthy only (163)    | OTU294, OTU135, OTU1296, OTU1317, OTU343, OTU1107, OTU1273, OTU82, OTU953, OTU908, OTU1030, OTU1329, OTU70, OTU1085, OTU1212, OTU318, OTU833, OTU1141, OTU1113, OTU1215, OTU1087, OTU191, OTU1290, OTU1118, OTU1220, OTU1078, OTU16, OTU131, OTU1233, OTU1140, OTU189, OTU21, OTU1064, OTU550, OTU1359, OTU1265, OTU340, OTU1252, OTU125, OTU1340, OTU1036, OTU1221, OTU714, OTU1384, OTU1264, OTU262, OTU762, OTU1349, OTU490, OTU1054, OTU618, OTU1001, OTU89, OTU1258, OTU9, OTU1350, OTU1158, OTU1293, OTU1243, OTU1211, OTU1210, OTU79, OTU1362, OTU588, OTU911, OTU826, OTU1244, OTU389, OTU1156, OTU560, OTU861, OTU1130, OTU943, OTU1044, OTU174, OTU1365, OTU66, OTU1148, OTU1304, OTU507, OTU1393, OTU1065, OTU897, OTU158, OTU1235, OTU427, OTU1106, OTU1259, OTU317, OTU1308, OTU239, OTU902, OTU1071, OTU77, OTU193, OTU1115, OTU1196, OTU1186, OTU1214, OTU384, OTU48, OTU1088, OTU1124, OTU1241, OTU1272, OTU280, OTU574, OTU1300, OTU1151, OTU443, OTU1219, OTU960, OTU1117, OTU1392, OTU98, OTU971, OTU915, OTU103, OTU72, OTU1360, OTU1102, OTU1352, OTU631, OTU297, OTU1301, OTU104, OTU1038, OTU1260, OTU935, OTU276, OTU445, OTU1191, OTU425, OTU1248, OTU955, OTU1082, OTU1323, OTU298, OTU1184, OTU1261, OTU1138, OTU60, OTU982, OTU1315, OTU1024, OTU85, OTY64, OTU981, OTU787, OTU86, OTU840, OTU1029, OTU1204, OTU917, OTU669, OTU93, OTU385, OTU313, OTU1116, OTU286, OTU1083, OTU1277, OTU197 |
|           | Lung cancer only (97) | OTU893, OTU774, OTU721, OTU794, OTU486, OTU746, OTU600, OTU555, OTU726, OTU739, OTU595, OTU1000, OTU1331, OTU910, OTU779, OTU821, OTU374, OTU713, OTU706, OTU183, OTU738, OTU435, OTU778, OTU737, OTU708, OTU949, OTU649, OTU867, OTU112, OTU702, OTU675, OTU666, OTU1378, OTU797, OTU593, OTU828, OTU173, OTU705, OTU639, OTU870, OTU647, OTU707, OTU629, OTU635, OTU178, OTU1338, OTU511, OTU454, OTU650, OTU18, OTU947, OTU646, OTU769, OTU733, OTU807, OTU619, OTU462, OTU679, OTU1015, OTU724, OTU736, OTU10, OTU637, OTU729, OTU892, OTU783, OTU596, OTU599, OTU218, OTU594, OTU933, OTU212, OTU843, OTU777, OTU1018, OTU605, OTU849, OTU809, OTU985, OTU937, OTU110, OTU556, OTU1400, OTU978, OTU989, OTU1372, OTU854, OTU1325, OTU44, OTU697, OTU308, OTU1045, OTU652, OTU460, OTU461, OTU836, OTU732                                                                                                                                                                                                                                                                                                                                                                                                                                                                                                                                                                                                             |
| Species   | Healthy only (33)     | Selenomonas_unc, Lactobacillus ruminis, Allobaculum_unc, Kocuria palustris, Veillonella_unc, Leptotrichia_unc, Acinetobacter_unc, Rothia dentocariosa, Haemophilus_unc, [Eubacterium]_unc, F16_unc, Neisseria_unc, Sphingomonas yabuuchiae, Proteus_unc, 0319-7L14_unc, Micrococcus luteus, Succinivibrio_unc, Propionibacteriaceae_unc, Leuconostoc_unc, EtOH8_unc, Lactobacillaceae_unc, Betaproteobacteria_unc, Streptococcaceae agalactiae, Actinobacillus parahaemolyticus, Neisseriaceae_unc, Geobacillus vulcani, Lactobacillus iners, Lautropia_unc, Streptococcus sobrinus, Enhydrobacter_unc, Capnocytophaga_unc, Mitsukella multacida, RF32_unc                                                                                                                                                                                                                                                                                                                                                                                                                                                                                                                                                                                                                                                                                                                                                                |
|           | Lung cancer only (18) | Campylobacter ureolyticus, Mitsukella_unc, Bacilli_unc, Corynebacterium_unc, Plesiomonas shigelloides, Morganella morgani, Vagococcus_un, Victivallaceae_unc, Desulfovibrionaceae_unc, Prevotella nigrescens, Providencia_unc, Bacillus fumarioli,                                                                                                                                                                                                                                                                                                                                                                                                                                                                                                                                                                                                                                                                                                                                                                                                                                                                                                                                                                                                                                                                                                                                                                        |

|        |                   |                                                                                                                                                                                                                                                                                                                              |
|--------|-------------------|------------------------------------------------------------------------------------------------------------------------------------------------------------------------------------------------------------------------------------------------------------------------------------------------------------------------------|
|        |                   | Lysinibacillus boronitolerans, Verrucomicrobia_unc, Sneathia_unc, Lactobacillus agilis, Clostridia_unc, Macrocooccus caseolyticus                                                                                                                                                                                            |
| Genus  | Healthy only (22) | Micrococcus, Capnocytophaga, Proteus, Kocuria, Geobacillus, Sphingomonas, Allobaculum, Leuconostoc, Betaproteobacteria_unc, RF32_unc, 0319-7L14_unc, Succinivibrio, Leptotrichia, Neisseriaceae_unc, Lactobacillaceae_unc, EtOH8_unc, Lautropia, Enhydrobacter, Actinobacillus, Propionibacteriaceae_unc, Neisseria, F16_unc |
|        | Lung cancer (12)  | Providencia, Victivallaceae_unc, Lysinibacillus, Plesiomonas, Morganella, Bacilli_unc, Verrucomicrobia_unc, Sneathia, Vagococcus, Desulfovibrionaceae_unc, Clostridia_unc, Macrocooccus                                                                                                                                      |
| Phylum | Healthy only (0)  | None                                                                                                                                                                                                                                                                                                                         |
|        | Lung cancer (1)   | Lentisphaerae                                                                                                                                                                                                                                                                                                                |

**Table S4 Relative abundance of specific microbe in patients with lung cancer according to their smoking status**

| Classification               | Never smoker (73) |           | Ever smoker (3) |          | P value   |
|------------------------------|-------------------|-----------|-----------------|----------|-----------|
|                              | Mean              | Sd        | Mean            | Sd       |           |
| <b>Phylum</b>                |                   |           |                 |          |           |
| Firmicutes                   | 49.68             | 14.18     | 66.34           | 1.616    | 0.04262   |
| SR1                          | 5.82E-05          | 0.0004976 | 0.004251        | 0.007363 | 0.00076   |
| Chloroflexi                  | 0.0004076         | 0.002259  | 0.001417        | 0.002454 | 0.0355    |
| Planctomycetes               | 0.0001165         | 0.0006988 | 0.001417        | 0.002454 | 0.009     |
| <b>Genus</b>                 |                   |           |                 |          |           |
| Lactobacillus                | 0.3176            | 1.709     | 0.4492          | 0.438    | 0.007665  |
| RF32_unc                     | 0.01101           | 0.05982   | 0.2848          | 0.4933   | 0.047     |
| Veillonella                  | 0.1123            | 0.3406    | 0.08786         | 0.09365  | 0.04623   |
| Clostridium                  | 0.0976            | 0.1782    | 0.001417        | 0.002454 | 0.0341    |
| Acidaminococcus              | 0.04164           | 0.229     | 0.03968         | 0.06508  | 0.03991   |
| SR1_unc                      | 5.82E-05          | 0.0004976 | 0.004251        | 0.007363 | 0.00076   |
| SHA-31_unc                   | 0.0001747         | 0.001106  | 0.001417        | 0.002454 | 0.01017   |
| Cryomorpha                   | 0.0001165         | 0.0006988 | 0.001417        | 0.002454 | 0.009056  |
| Brocadiaceae_unc             | 0.0001165         | 0.0006988 | 0.001417        | 0.002454 | 0.009056  |
| Candidatus_Xiphinematobacter | 0.0001165         | 0.0006988 | 0.001417        | 0.002454 | 0.009056  |
| Rs-045_unc                   | 5.82E-05          | 0.0004976 | 0.001417        | 0.002454 | 0.0009029 |
| <b>Species</b>               |                   |           |                 |          |           |
| Bifidobacterium breve        | 0.001514          | 0.008454  | 0.3613          | 0.6259   | 0.02291   |
| Lactobacillus salivarius     | 0.05125           | 0.3928    | 0.2962          | 0.2495   | 0.0006077 |
| RF32_unc                     | 0.01101           | 0.05982   | 0.2848          | 0.4933   | 0.047     |
| Veillonella dispar           | 0.1123            | 0.3406    | 0.08786         | 0.09365  | 0.04623   |
| Acidaminococcus_unc          | 0.04164           | 0.229     | 0.03968         | 0.06508  | 0.03991   |
| Streptococcus anginosus      | 0.04979           | 0.3957    | 0.01559         | 0.01609  | 0.01328   |
| Lactobacillus_unc            | 0.003086          | 0.01345   | 0.05101         | 0.07412  | 0.01397   |
| Lactobacillus helveticus     | 0.0006406         | 0.003794  | 0.01984         | 0.02417  | 1.60E-05  |
| Streptococcus sobrinus       | 0.0001165         | 0.0006988 | 0.01984         | 0.03436  | 0.007176  |
| Coprobacillus cateniformis   | 0.008211          | 0.05166   | 0.005668        | 0.006494 | 0.01648   |
| SR1_unc                      | 5.82E-05          | 0.0004976 | 0.004251        | 0.007363 | 0.00076   |
| Corynebacterium_unc          | 0.0001747         | 0.001493  | 0.002834        | 0.004909 | 0.001073  |
| SHA-31_unc                   | 0.0001747         | 0.001106  | 0.001417        | 0.002454 | 0.01017   |
| Brocadiaceae_unc             | 0.0001165         | 0.0006988 | 0.001417        | 0.002454 | 0.009056  |
| Candidatus_Xiphinematobacter | 0.0001165         | 0.0006988 | 0.001417        | 0.002454 | 0.009056  |
| Cryomorpha_unc               | 0.0001165         | 0.0006988 | 0.001417        | 0.002454 | 0.009056  |
| Rs-045_unc                   | 5.82E-05          | 0.0004976 | 0.001417        | 0.002454 | 0.009056  |
| Streptococcus agalactiae     | 5.82E-05          | 0.0004976 | 0.001417        | 0.002454 | 0.009029  |

**File S1 The characteristic sequences of 35 species of microbes**

| Species                      | OTU ID  | Characteristic sequences                                                                                                                                                                                                                                                                                                                                                                                                                              |
|------------------------------|---------|-------------------------------------------------------------------------------------------------------------------------------------------------------------------------------------------------------------------------------------------------------------------------------------------------------------------------------------------------------------------------------------------------------------------------------------------------------|
| Faecalibacterium prausnitzii | OTU175  | GTGAGGAATATTGGTCAATGGGGAAACCCTGATGCAGCGACGCCGCTGGAGGAAGAAGGTCTTCGG<br>ATTGTAACTCCTGTTGTTGAGGAAGATAATGACGGTACTCAACAAGGAAGTGACGGCTAACTACGTGC<br>CAGCAGCCCGGTAAAACGTAGGTCACAAGCGTTGTCCGGAATTACTGGGTGTAAGGGAGCGCAGGC<br>GGGAAGACAAGTTGGAAGTGAATCCATGGGCTCAACCCATGAACTGCTTTCAAACTGTTTTCTTGA<br>GTAGTGCAGAGGTAGGCGGAATCCCGGTGTAGCGGTGGAATGCGTAGATATCGGGAGGAACACCAGTG<br>GCGAAGGCGGCTACTGGGCACCAACTGACGCTGAGGCTCGAAAGTGTGGGTAGCAACAGGATTAGA<br>AACCTAGTAGTCC |
|                              | OTU799  | GTGGGAATATTGCACAATGGGGAAACCCTGATGCAGCGACGCCGCTGGAGGAAGAAGGTCTTCGG<br>ATTGTAACTCCTGTTGTTGAGGAAGATAATGACGGTACTCAACAAGGAAGTGACGGCTAACTACGTGC<br>CAGCAGCCCGGTAAAACGTAGGTCACAAGCGTTGTCCGGAATTACTGGGTGTAAGGGAGCGCAGGC<br>GGGAGAACAAGTTGGAAGTGAATCCATGGGCTCAACCCATGAACTGCTTTCAAACTGTTTTCTTGA<br>GTAGTGCAGAGGTAGGCGGAATCCCGGTGTAGCGGTGGAATGCGTAGATATCGGGAGGAACACCAGTG<br>GCGAAGGCGGCTACTGGGCACCAACTGACGCTGAGGCTCGAAAGTGTGGGTAGCAACAGGATTAGA<br>AACCTAGTAGTCC  |
|                              | OTU616  | GTGGGAATATTGCACAATGGGGAAACCCTGATGCAGCGACGCCGCTGGAGGAAGAAGGTCTTCGG<br>ATTGTAACTCCTGTTGTTGAGGAAGATAATGACGGTACTCAACAAGGAAGTGACGGCTAACTACGTGC<br>CAGCAGCCCGGTAAAACGTAGGTCACAAGCGTTGTCCGGAATTACTGGGTGTAAGGGAGCGCAGGC<br>GGGAAGACAAGTTGGAAGTGAATCTATGGGCTCAACCCATAAAGTCTTTCAAACTGTTTTCTTGA<br>GTAGTGCAGAGGTAGGCGGAATCCCGGTGTAGCGGTGGAATGCGTAGATATCGGGAGGAACACCAGTG<br>GCGAAGGCGGCTACTGGGCACCAACTGACGCTGAGGCTCGAAAGTGTGGGTAGCAACAGGATTAGA<br>AACCTAGTAGTCC   |
|                              | OTU14   | GTGGGAATATTGCACAATGGGGAAACCCTGATGCAGCGACGCCGCTGGAGGAAGAAGGTCTTCGG<br>ATTGTAACTCCTGTTGTTGAGGAAGATAATGACGGTACTCAACAAGGAAGTGACGGCTAACTACGTGC<br>CAGCAGCCCGGTAAAACGTAGGTCACAAGCGTTGTCCGGAATTACTGGGTGTAAGGGAGCGCAGGC<br>GGGAAGACAAGTTGGAAGTGAATCCATGGGCTCAACCCATAAAGTCTTTCAAACTGTTTTCTTGA<br>GTAGTGCAGAGGTAGGCGGAATCCCGGTGTAGCGGTGGAATGCGTAGATATCGGGAGGAACACCAGTG<br>GCGAAGGCGGCTACTGGGCACCAACTGACGCTGAGGCTCGAAAGTGTGGGTAGCAACAGGATTAGA<br>AACCTAGTAGTCC   |
|                              | OTU363  | GTGGGAATATTGCACAATGGGGAAACCCTGATGCAGCGACGCCGCTGGAGGAAGAAGGTCTTCGG<br>ATTGTAACTCCTGTTGTTGAGGAAGATAATGACGGTACTCAACAAGGAAGTGACGGCTAACTACGTGC<br>CAGCAGCCCGGTAAAACGTAGGTCACAAGCGTTGTCCGGAATTACTGGGTGTAAGGGAGCGCAGGC<br>GGGAAGACAAGTTGGAAGTGAATCTATGGGCTCAACCCATAAAGTCTTTCAAACTGTTTTCTTGA<br>GTAGTGCAGAGGTAGGCGGAATCCCGGTGTAGCGGTGGAATGCGTAGATATCGGGAGGAACACCAGTG<br>GCGAAGGCGGCTACTGGGCACCAACTGACGCTGAGGCTCGAAAGTGTGGGTAGCAACAGGATTAGA<br>AACCTTGTAGTCC   |
|                              | OTU1175 | GTGGGAATATTGCACAATGGGGAAACCCTGATGCAGCGACGCCGCTGGAGGAAGAAGGTCTTCGG<br>ATTGTAACTCCTGTTGTTGGGAAGATAATGACGGTACCCAAACAAGGAAGTGACGGCTAACTACGTGC<br>CAGCAGCCCGGTAAAACGTAGGTCACAAGCGTTGTCCGGAATTACTGGGTGTAAGGGAGCGCAGGC<br>GGGAAGACAAGTTGGAAGTGAATCTATGGGCTCAACCCATAAAGTCTTTCAAACTGTTTTCTTGA<br>GTAGTGCAGAGGTAGGCGGAATCCCGGTGTAGCGGTGGAATGCGTAGATATCGGGAGGAACACCAGTG<br>GCGAAGGCGGCTACTGGGCACCAACTGACGCTGAGGCTCGAAAGTGTGGGTAGCAACAGGATTAGA<br>AACCTAGTAGTCC   |

|                         |         |                                                                                                                                                                                                                                                                                                                                                                                                                                                            |
|-------------------------|---------|------------------------------------------------------------------------------------------------------------------------------------------------------------------------------------------------------------------------------------------------------------------------------------------------------------------------------------------------------------------------------------------------------------------------------------------------------------|
|                         | OTU1172 | GTGGGGAATATTGCACAATGGGGGAAACCCTGATGCAGCGACGCCGCGTGAGGAAGAAGGTCTTCGG<br>ATTGTAACTCCTGTTGTTGAGGAAGATAATGACGGTACTCAACAAGGAAGTGACGGCTAACTACGTGC<br>CAGCAGCCCGGTAACCGTAGGTCACAAGCGTTGTCCGGAATTACTGGGTGTAAGGGGAGCGCAGGC<br>GGGAAGACAAGTTGGAAGTGAATCCATGGGCTCAACCCATGAACTGCTTTCAAACTGTTTTTCTTGA<br>GTAGTGCAGAGGTAGGCGGAATCCCGGTGTAGCGGTGGAATGCGTAGATATCGGGAGGAACACCAAGTG<br>GCGAAGGCGGCCTACTGGGCACCAACTGACGCTGAGGCTCGAAAGTGTGGGTAGCAACAGGATTAGA<br>TACCCTAGTAGTCC |
| Ruminococca<br>ceae_unc | OTU1095 | GTGGGGAATATTGCACAATGGGGGAAACCCTGATGCAGCGACGCCGCGTGAGGAAGAAGGTCTTCGG<br>ATTGTAACTCCTGTTGTTGAGGAAGATAATGACGGTACTCAACAAGGAAGTGACGGCTAACTACGTGC<br>CAGCAGCCCGGTAACCGTAGGTCACAAGCGTTGTCCGGAATTACTGGGTGTAAGGGGCGTGTAGGCG<br>GGATTGCAAGTCAGGCGTGAACACCAGGGCTCAACCTCTGGCTGCGTTTAAACTGTAGTCTTGAG<br>TACTGGAGAGGTTGACCGAATCCTAGTGTAGCGGTGAAATGCGTAGATATTAGGAGGAACACCAAGTG<br>CGAAGGCGGTCAACTGGACAGCAACTGACGCTGAGGCGGAAAGCGTGGGGAGCAACAGGATTAGA<br>AACCTTGTAGTCC      |
|                         | OTU1157 | GTGGGGAATATTGGCAATGGGCGAAAGCCTGACCCAGCGACGCCGCGTGAGGAAGAAGGTCTTCGG<br>ATTGTAACTTAGTCAACAGGGAAGAAGAAAGTGACGGTACCTGTGGAGGAAGCCACGGCTAACTAC<br>GTGCCAGCAGCCGCGTAATACGTAGGTGGCGAGCGTTATCCGATTACTGGGTGTAAGGGTGTGTAG<br>GCGGGATTGCAAGTCAGATGTGAAAATATGGGCTCAACTCATAAAGTGCATTGAACTGCAGTCTTG<br>AGTATCGGAGAGGTAAGCGGAATCCCGGTGTAGCGGTGAAATGCGTAGATATCGGGAGGAACACCGGT<br>GGCGAAGGCGGCTTACTGGACGACAAGTACGCTGAGACACGAAAGTGTGGGGAGCAACAGGATTAG<br>AAACCTAGTAGTCC       |
|                         | OTU1021 | GTGGGGAATATTGCACAATGGGGGAAACCCTGATGCAGCGACGCCGCGTGAGGAAGAAGGTCTTCGG<br>ATTGTAACTCCTGTTGTTGAGGAAGATAATGACGGTACTCAACAAGGAAGTGACGGCTAACTACGTGC<br>CAGCAGCCCGGTAACCGTAGGTCACAAGCGTTGTCCGGAATTACTGGGTGTAAGGGGCGTGTAGGCG<br>GAGAAGCAAGTCAGAAGTGAATCCATGGGCTTAACCCATGAACTGCTTTTGAACCTGTTCCCTTGAG<br>TATCGGAGAGGCAGGCGGAATCCCTAGTGTAGCGGTGAAATGCGTAGATATTAGGAGGAACACCAAGTG<br>CGAAGGCGGCCTGCTGGACGACAAGTACGCTGAGGCGGAAAGCGTGGGGAGCAACAGGATTAGAT<br>ACCTAGTAGTCC    |
|                         | OTU525  | GTGGGGAATATTGCACAATGGGGGAAACCCTGATGCAGCGACGCCGCGTGAGGAAGAAGGTCTTCGG<br>ATTGTAACTCCTGTTGTTGGGACGATAATGACGGTACCACAGGAGGAAGCCATGGCTAACTACGTGCC<br>AGCAGCCCGGTAATACGTAGATGGCGAGCGTTGTCCGGAATTACTGGGTGTAAGGGGAGTGTAGGCGG<br>GATCATAAGTTGCGTGTGAAATGCAGGGGCTCAACCCCTGAACTGCGCGCAAACTGTGGTCTTGAGT<br>GAAGTAGAGGCAGGCGGAATCCCGGTGTAGCGGTGGAATGCGTAGATATCGGGAGGAACACCAAGTG<br>CGAAGGCGGCCTGCTGGGCTTTTACTGACGCTGAGGCTCGAAAGCATGGGGAGCAACAGGATTAGAA<br>ACCCGAGTAGTCC  |
|                         | OTU349  | GTGGGGAATATTGCACAATGGGGGAAACCCTGATGCAGCGACGCCGCGTGAAAGGAAGAAGTATCTCGGT<br>ATGTAACTTCTATCAGCAGGGAAGATAGTACGGTACCTGACTAAGAAGCCACGGCTAACTACGTGCC<br>AGCAGCCCGGTAATACGTAGGTGCAAGCGTTGTCCGATTACTGGGTGTAAGGGGCGTGTAGGCGG<br>AGATGCAAGTCAGATGTGAAATCCTCGGGCTTAACCCGGAACTGCATTGAACTGTATCCCTTGAGTA<br>TCGGAGAGGCAGGCGGAATCCTAGTGTAGCGGTGAAATGCGTAGATATTAGGAGGAACACCAAGTG<br>AAGGCGGCCTGCTGGACGACAAGTACGCTGAGGCGGAAAGCGTGGGGAGCAACAGGATTAGATAC<br>CCCGGTAGTCC        |
|                         | OTU953  | GTGGGGGATATTGCACAATGGGCACAAGCCTGATGCAGCAACGCCGCGTGAGGAAGACGGTCTTCGG<br>ATTGTAACTTTGTTCTTAGTGAAGAAACATGACGGTAGCTAAGGAGAAAGCCACGGCTAACTACGTG                                                                                                                                                                                                                                                                                                                 |

|         |                                                                                                                                                                                                                                                                                                                                                                                                                                                                                    |
|---------|------------------------------------------------------------------------------------------------------------------------------------------------------------------------------------------------------------------------------------------------------------------------------------------------------------------------------------------------------------------------------------------------------------------------------------------------------------------------------------|
|         | <p>CCAGCAGCCGCGTAATACGTAGGTGGCAAGCGTTGTCCGGAATTACTGGGTGTAAAGGGAGCGCAGGC<br/> GGGAGAGCAAGTCAGCTGTGAAATCTAAGGGCTTAACCCCTAAATTGCAGTTGAAACTGTTTTCTTGAG<br/> TGAAGTAGAGGTAGGCGGAATCCGAGTGTAGCGGTGAAATGCGTAGATATCCGGAGGAACACCAGTGG<br/> CGAAGGCGGCCTACTGGGCTTAACTGACGCTGAGGCTCGAAAGTGTGGGGAGCAAACAGGATTAGAA<br/> ACCCTAGTAGTCC</p>                                                                                                                                                       |
| OTU1085 | <p>GTGGGGAATATTGGGCAATGGGCGAAAGCCTGACCCAGCAACGCCGCGTGAAGGAAGAAGGTCTTCGG<br/> ATTGTAAACTTTTGTCTTATGGGACGATAATGACGGTACCATAGGAGGAAGCCACGACTAACTACGTGCC<br/> AGCAGTCGCGGTAATACGTAGGTGGCAAGCGTTATCCGGAATTATGGGTGTAAAGGGTGCCTAGGCGG<br/> GATGTAAAGTCAGATGTGAAATACGTGGGCTCAACCCACGAACTGCATTTGAAACTTACGTTCTTGAGTC<br/> AAGTAGAGGCAAGCGGAATCCAGTGTAGCGGTGAAATGCGTAGATATTGGGAGGAACACCAGTGGCG<br/> AAGGCGGCTTGCTGGGCTTGAAGTACGCTGAGGCACGAAAGTGTGGGGAGCAAACAGGATTAGATAC<br/> CCTAGTAGTCC</p>   |
| OTU1370 | <p>GTGGGGATATTGCACAATGGGCGAAAGCCTGATGCAGCGACGCCGCGTGAAGGAAGAAGGTCTTCGG<br/> ATTGTAAACCTCTGTCTTCAGGGACGATAATGACGGTACCTGAGGAGGAAGCCACGGCTAACTACGTGC<br/> CAGCAGCCGCGGTAATACGTAGGTGGCAAGCGTTGTCCGGAATTACTGGGTGTAAAGGGAGCGTAGGCG<br/> GGAAGTCAAGTTGAATGTGAAATCGATCGGCTCAACCCGTCGCTGCGTTCAAAACTGATTTCTTGAGT<br/> GAAGTAGAGGCAAGCGGAATCCTAGTGTAGCGGTGAAATGCGTAGATATTAGGAGGAACACCAGTGGC<br/> GAAGGCGGCTTGCTGGGCTTAACTGACGCTGAGGCTCGAAAGTGTGGGTAGCAAACAGGATTAGAAA<br/> CCCTTGATGTC</p>     |
| OTU963  | <p>GTGGGGAATATTGGGCAATGGGCGAAACCTGACCCAGCAACGCCGCGTGAAGGAAGAAGGTCTTCGG<br/> GTTGTAAACTTCTTTTACCAGGGACGAAACAAATGACGGTACCTGGAGAAAAGCTCCGGCTAACTACG<br/> TGCCAGCAGCCGCGGTAATACGTAGGGAGCAAGCGTTGTCCGGATTTACTGGGTGTAAAGGGCGGTAG<br/> GCGGAGATGCAAGTCAGATGTGAAATCTGGGGCTCAACCCCAAACCTGCATTTGAAACTGTATCCCTT<br/> GAGTATCGGAGAGGCAGGCGGAATCCTAGTGTAGCGGTGAAATGCGTAGATATTAGGAGGAACACCAG<br/> TGGCGAAGGCGGCTGCTGGACGACAACCTGACGCTGAGGCGGAAAGCGTGGGGAGCAAACAGGATT<br/> AGATACCCTAGTAGTCC</p>  |
| OTU967  | <p>GTGGGGAATATTGGGCAATGGGCGAAAGCCTGACCCAGCAACGCCGCGTGAAGGAAGAAGGTCTTCGG<br/> ATTGTAAACTTCTTTATGAGGGACGAAGGAAGTACGGTACCTCATGAATAAGCCACGGCTAACTACGT<br/> GCCAGCAGCCGCGGTAATACGTAGGTGGCAAGCGTTGTCCGGATTTACTGGGTGTAAAGGGCGGTAGG<br/> CGGGATGGCAAGTCAGATGTGAAATCCATGGGCTCAACCCATGAACTGCATTTGAAACTGTCTTCTTGA<br/> GTATCGGAGAGGCAAGCGGAATCCTAGTGTAGCGGTGAAATGCGTAGATATTAGGAGGAACACCAGTG<br/> GCGAAGGCGGCTTGCTGGACGACAACCTGACGCTGAGGCGGAAAGCGTGGGGAGCAAACAGGATTAG<br/> AAACCCTAGTAGTCC</p> |
| OTU805  | <p>GTGGGGATATTGCACAATGGGCGAAAGCCTGATGCAGCGACGCCGCGTGAAGGATGAAGGTCTTCGG<br/> GTTGTAAACCTCTGTCTTCGGGACGAAGAAAGTACGGTACCGAAGAAGGAAGCTCCGGCTAACTACG<br/> TGCCAGCAGCCGCGGTAATACGTAGGGAGCAAGCGTTGTCCGGAATTACTGGGTGTAAAGGGAGCGTAG<br/> GCGGGAAAGCAAGTTGGAAGTGAATGCATGGGCTCAACCCATGAGCTGCTTTCAAACCTGTTTTCTT<br/> GAGTGAAGTAGAGGCAGGCGGAATCCTAGTGTAGCGGTGAAATGCGTAGATATTAGGAGGAACACCAG<br/> TGGCGAAGGCGGCTGCTGGGCTTAACTGACGCTGAGGCTCGAAAGCGTGGGTAGCAAACAGGATTA<br/> GAAACCCTAGTAGTCC</p>    |
| OTU1161 | <p>GTGGGGAATATTGCGCAATGGGCGAAACCTGACGCAGCAACGCCGCGTGAAGGATGAAGGTCTTCGG<br/> ATTGTAAACTTCTTTGACGAGGGACGATAATGACGGTACCTCGAAAACAAGCCACGGCTAACTACGTGC<br/> CAGCAGCCGCGGTAATACGTAGGTGGCGAGCGTTATCCGATTTACTGGGTGTAAAGGGCGAGTAGGCG<br/> GGCATGCAAGTCAGATGTGAAATTTATGGGCTCAACCCATAACCTGCATTTGAAACTGTGTCTTGAGT</p>                                                                                                                                                                          |

|         |                                                                                                                                                                                                                                                                                                                                                                                                                                                                    |
|---------|--------------------------------------------------------------------------------------------------------------------------------------------------------------------------------------------------------------------------------------------------------------------------------------------------------------------------------------------------------------------------------------------------------------------------------------------------------------------|
|         | GATGGAGAGGCAGGCGGAATCCGTGTGTAGCGGTGAAATGCGTAGATATACGGAGGAAACACCAGTGGC<br>GAAGGCGCCTGCTGGACATTAACCTGACGCTGAGGCGGAAAGCGTGGGAGCAAACAGGATTAGAAA<br>CCCGTGTAGTCC                                                                                                                                                                                                                                                                                                        |
| OTU1194 | GTGGGGAATATTGGGCAATGGGCGAAAGCCTGACCCAGCGACGCCGCGTGAAGGATGAAGGTCTTCGG<br>ATTGTAACTTCTGTCTACAGGGACGAACAAATGACGGTACCTGTAAAGAAAGCCACGGCTAACTACGT<br>GCCAGCAGCCGCGGTAATACGTAGGTGGCAAGCGTTATCCGGATTTACTGGGTGTAAAGGGTGTGTAGG<br>GGGAAGCCAAGTCAGATGTGAAAATCATGGGCTCAACTCATGACTTGCATTGAAAAGTGGTTTCTTGTAG<br>TATGGGAGAGGTAATGGAATCCCGGTGTAGCGGTGAAATGCGTAGATATACGGGAGGAAACACCAGTGG<br>CGAAGGCGGTTTACTGGACCACAACCTGACGCTGATACACGAAAGCGTGGGAGCAAACAGGATTAGAA<br>ACCCTAGTAGTCC  |
| OTU837  | GTGGGGAATATTGGGCAATGGGCGAAAGCCTGACCCAGCGACGCCGCGTGAAGGAAAGAAGGTCTTCGG<br>ATTGTAACTTTTGTGTAGGGGACGAAGGAAAGTACGGTACCCATCGAGGAAGCCACGGCTAACTACG<br>TGCCAGCAGCCGCGGTAATACGTAGGTGGCAGCGTTATCCGGATTTACTGGGTGTAAAGGGTGTGTAGG<br>CGGAGAGACAAGTCAGGTGTGAAAATATGGGCTCAACTCATAAACTGCGCTGAAAAGTGTATCCCTTG<br>AGAGTCGGAGGGTAAATGGAATCCCGGTGTAGCGGTGAAATGCGTAGATATCGGGAGGAAACACCGGT<br>GGCGAAGGCGGTTTACTGGACGACAACCTGACGCTGAGACACGAAAGTGTGGGAGCAAACAGGATTAG<br>AAACCCAGTAGTCC    |
| OTU1216 | GTGGGGAATATTGGGCAATGGGCGAAAGCCTGACCCAGCGACGCCGCGTGAAGGAAAGACGGTCTTCGG<br>ATTGTAACTCTTTCAGCAGGGAAGACAAAAGGACGGTACCTGCAGAAAGCCACGGCTAACTACG<br>TGCCAGCAGCCGCGGTAATACGTAGGTGGCAAGCGTTATCCGGAATTTACTGGGTGTAAAGGGTGTGTAG<br>GCGGGACTGCAAGTCAGATGTGAAAATCATGGGCTCAACCCATGACCTGCGTCTGAAAAGTGTGGTTCTT<br>GAGAGTGGGAGAGGTAGATGGAATCCCGGTGTAGCGGTGAAATGCGTAGATATCGGGAGGAAACACCAG<br>TGGCGAAGGCGATCTACTGGACCACAACCTGACGCTGAGACACGAAAGCGTGGGAGCAAACAGGATTA<br>GAAACCCGAGTAGTCC |
| OTU1215 | GTGGGGAATATTGGGCAATGGGCGAAAGCCTGACCCAGCGACGCCGCGTGAAGGAAAGAAGGTCTTCGG<br>ATTGTAACTTAGTATTCGGGGAAGAAGCAAGTACGGTACCCGAAGAGAAAGCCACGGCTAACTACG<br>TGCCAGCAGCCGCGGTAATACGTAGGTGGCAGCGTTATCCGGAATTTACTGGGTGTAAAGGGTGTGTAG<br>GCGGGATAGCAAGTCAGATGTGAAAATATGGGCTTAACCCATAACCTGCATTTGAAAAGTGTATTCTTGA<br>GTGTCGGAGAGGTAAATGGAATCCCGGTGTAGCGGTGAAATGCGTAGATATCGGGAGGAAACACCAGTG<br>GCGAAGGCGGTTTACTGGACGACAACCTGACGCTGAGACACGAAAGCGTGGGAGCAAACAGGATTAGA<br>AACCTAGTAGTCC   |
| OTU446  | GTGGGGAATATTGCACAATGGGGGAAACCCTGATGCAGCGACGCCGCGTGAAGGAAAGAAGGCCTTCGG<br>GTTGTAACTCCTGTCGTAAGGACGATAGTACGGTACCTTACAAGAAAGCCACGGCTAACTACGTGC<br>CAGCAGCCGCGTAAAACGTAGGTGGCAAGCGTTGTCCGGAATTTACTGGGTGTAAAGGGAGCGCAGGC<br>GGGTCTGCAAGTTGGAAGTAAAACCTCATGGGCTCAACCCATGAACTGCTTTCAAAAAGTGGGATCTTGA<br>GTGGTGTAGAGGTAGGCGGAATCCCGGTGTAGCGGTGGAATGCGTAGATATCGGGAGGAAACACCAGTG<br>GCGAAGGCGGCTACTGGGCACTAACTGACGCTGAGGCTCGAAAGCATGGGTAGCAAACAGGATTAGA<br>AACCTAGTAGTCC     |
| OTU42   | GTGGGGAATATTGGGCAATGGGGGAAACCCTGACCCAGCAACGCCGCGTGAAGGAAAGAAGGCCTTCGG<br>GTTGTAACTTCTTTTACCAGGACGAAGAAGTACGGTACCTGGAGAAAAGCCACGGCTAACTACG<br>TGCCAGCAGCCGCGGTAATACGTAGGTGGCAAGCGTTGTCCGGATTTACTGGGTGTAAAGGGCGTGTAG<br>GCGGAGCTGCAAGTCAGATGTGAAAATCTGGGGCTTAACCCCTAAAAGTGCATTTGAAAAGTGTAGCCCTT<br>GAGTATCGGAGAGGCAGGCGGAATCCTAGTGTAGCGGTGAAATGCGTAGATATTAGGAAGAACACCAG<br>TGGCGAAGGCGCCTGCTGGACGACAACCTGACGCTGAGGCGGAAAGCGTGGGAGCAAACAGGATT                         |



|         |                                                                                                                                                                                                                                                                                                                                                                                                                                                                                 |
|---------|---------------------------------------------------------------------------------------------------------------------------------------------------------------------------------------------------------------------------------------------------------------------------------------------------------------------------------------------------------------------------------------------------------------------------------------------------------------------------------|
|         | AGAAACCTAGTAGTCC                                                                                                                                                                                                                                                                                                                                                                                                                                                                |
| OTU780  | GTGGGAATATTGGCAATGGGCGCAAGCCTGACCCAGCAACGCCGCGTGAAGGAAGAAGGCTTTCGG<br>GTTGTAAACTTCTTTGTCAAGGACGAGTAGAAGACGGTACCTGACGAATAAGCCACGGCTAACTACGT<br>GCCAGCAGCCGCGTAATACGTAGGTGGCAAGCGTTGTCCGATTTACTGGGTGTAAGGGCGGTGATAGG<br>CGGAGATGCAAGTTGGGAGTAAAATCCATGGGCTCAACCCATGAACTGCTCTAAAAGTATCCCTTG<br>AGTATCGGAGAGGCAAGCGGAATTCTAGTGTAGCGGTGAAATGCGTAGATATTAGGAGGAACACCAAGT<br>GGCGAAGGCGGCTTGTGACGACAAGTACGCTGAGGCGCGAAAGCGTGGGGAGCAAAACAGGATTA<br>GAAACCTAGTAGTCC                       |
| OTU520  | GTGGGAATATTGCGCAATGGGGGAAACCTGACGCAGCAACGCCGCGTATTGAAAGAAGGCTTTCGG<br>GTTGTAAAGATCTTAATCAGGGACGAAACAAATGACGGTACCTGAAGAATAAGCTCCGGCTAACTACGT<br>GCCAGCAGCCGCGTAATACGTAGGGAGCAAGCGTTATCCGATTTACTGGGTGTAAGGGCGCGCAGG<br>CGGGCCGGCAAGTTGGAAGTAAAATCTATGGGCTTAACCCATAAACTGCTTTCAAAAGTCTGGTCTTGA<br>GTGATGGAGAGGCAGGCGGAATTCGTGTGTAGCGGTGAAATGCGTAGATATACGGAGGAACACCAAGT<br>GCGAAGGCGGCTGCTGGACATTAAGTACGCTGAGGCGCGAAAGCGTGGGGAGCAAAACAGGATTAGA<br>AACCTAGTAGTCC                      |
| OTU182  | GTGAGGAATATTGCGCAATGGGGGAAACCTGACGCAGCAATGCCGCGTGAAGGACGAAGGTTTTCGG<br>ATTGTAAACTTCTTTCTTGAGGACGATAATGACGGTACTCAAGGAATAAGCCACGGCTAACTACGTGCC<br>AGCAGCCGCGTAATACGTAGGTGGCAAGCGTTGTCCGATTTACTGGGTGTAAGGGCGAGTAGGCGG<br>GTTTGCAAGTCAGATGTAAATGCAGGGGCTTAACCCCTGAGCTGCATTTGAAAGTGTAGATCTTGAGTG<br>ATGGAGAGGCAGGCGGAATCCCGGTGTAGCGGTGGAATGCGTAGATATCGGGAGGAACACCAAGTGGCG<br>AAGGCGGCTGCTGGACATTAAGTACGCTGAGGAGCGAAAGCGTGGGGAGCAAAACAGGATTAGAAAC<br>CCTGTAGTCC                       |
| OTU188  | GTGGGAATATTGCACAATGGGCGCAAGCCTGATGCAGCAACGCCGCGTGAAGGAAGACGGTTCGG<br>ATTGTAAACCTCTGTCTTGGTGACGAAGAAGTACGGTAGCCAAGGAGGAAGCCACGGCTAACTACGT<br>GCCAGCAGCCGCGTAATACGTAGGTGGCAAGCGTTATCCGGAATTAAGGGTGTAAAGGGAGCGCAGG<br>CGGGATAGCAAGTCAGCGGTGAAATGCATGGGCTTAAGTATGAGCTGCCGTTGAAAGTGTATTCTTGA<br>GTGGAGTAGAGGCAGGCGGAATCCGAGTGTAGCGGTGAAATGCGTAGATATTGAGGGAACACCAAGT<br>GCGAAGGCGGCTGCTGGCTCTAACTGACGCTGAGGCTCGAAAGTGTGGGGAGCAAAACAGGATTAGA<br>TACCCTGTAGTCC                          |
| OTU1140 | GTGGGGATATTGCACAATGGGGGAAACCTGATGCAGCAGCGCCGCGTGAAGGAAGAAGGTTTTCGG<br>ATTGTAAACCTCTGTCTCAGTGACGATAATGACGGTAGCTGAGGAGGAAGCCACGGCTAACTACGTGC<br>CAGCAGCCGCGTAATACGTAGGTGGCAAGCGTTGTCCGGAATTAAGGGTGTAAAGGGAGCGTAGGCG<br>GGAATACAAGTTGGATGTCTAATCTACCGGCTTAACCGGATTCGATTCAAAAGTGTATTCTTGAGTGA<br>AGTAGAGGCAGGCGGAATCCTAGTGTAGCGGTGAAATGCGTAGATATTGAGGGAACACCAAGTGGCGA<br>AGGCGGCTGCTGGGCTTAACTGACGCTGAGGCTCGAAAGCGTGGGTAGCAAAACAGGATTAGAAACC<br>CTGTAGTCC                           |
| OTU1320 | GTGGGAATATTGCGCAATGGGCGAAAGCCTGACGCAGCAGCGCCGCGTGAAGGATGAAGGTTTCGG<br>ATCGTAAACCTCTGTCAAGGGGGAAGAAACCCCTCGTGTGAATAATGCGAGGGCTTACCGGTACCCCC<br>AAAGGAAGCAGCGGCTAACTCCGTGCCAGCAGCCGCGTAATACGGAGGTGCAAGCGTTATCCGAT<br>TACTGGGTGTAAAGGGCGGTAGGCGGGATTGCAAGTCAGATGTAAAAGTGGGGCTCAACCTCCAGC<br>CTGCATTTGAAAGTGTAGTCTTGTAGTGTGGAGAGGCAATCGGAATTCGTGTGTAGCGGTGAAATGCG<br>TAGATATACGGAGGAACACCAAGTGGCGAAGGCGGATTGCTGGACAGTAACTGACGCTGAGGCGCGAAA<br>GCGTGGGGAGCAAAACAGGATTAGAAACCTGTAGTCC |
| OTU183  | GTGGGAATATTGGCAATGGGCGAAAGCCTGACCCAGCAGCGCCGCGTGAAGGAAGAAGGCTTTCGG                                                                                                                                                                                                                                                                                                                                                                                                              |

|         |                                                                                                                                                                                                                                                                                                                                                                                                                                                                            |
|---------|----------------------------------------------------------------------------------------------------------------------------------------------------------------------------------------------------------------------------------------------------------------------------------------------------------------------------------------------------------------------------------------------------------------------------------------------------------------------------|
|         | <p>ATTGTAAACCTTTGTAGACAGGGACGAAGAAATGACGGTACCTGTAAAGTAAGCCACGGCTAACTACGT<br/> GCCAGCAGCCGCGGTAATACGTAGGTGGCAAGCGTTATCCGGATTTATTGGGTGTAAAGGGTGAGTAGGC<br/> GGGCTGACAAGTCAGATGTGAAATGTTACGGCTTAACCTGAGAACTGCATTGAAAAGTCCAGTCTTGA<br/> GAGTCGGAGGGTAATCGGAATCCCGGTGTAGCGGTGAAATGCGTAGAGATCGGGAGGAACACCAGT<br/> GGCGAAGGCGGATTACTGGACGACAACTGACGCTGAAACACGAAAGCGTGGGGAGCAAACAGGATTAG<br/> AAACCTGGTAGTCC</p>                                                                   |
| OTU1061 | <p>GTGGGAATATTGCACAATGGGCGAAGCCTGATGCAGCAACGCCCGTGAAGGAAGACGGTTTCGG<br/> ATTGTAACTTCTGTCTTAGTGAAGAATAATGACGGTAGCTAAGGAGCAAGCCACGGCTAACTACGTGC<br/> CAGCAGCCGCGGTAATACGTAGGTGGCAAGCGTTGTCCGGAATTACTGGGTGTAAAGGGAGCGCAGGGC<br/> GGTGATCAAGTCAGTGTGAAAACACGGGCTTAACCCGTAGACTGCAGTTGAAAAGTGTTCATCTTGAG<br/> TGAAGTAGAGGTTGGCGGAATCCGAGTGTAGCGGTGAAATGCGTAGATATCCGAGGAACACCAGTGG<br/> CGAAGGCGGCAACTGGGCTTAACTGACGCTGAGGCTCGAAAGTGTGGGGAGCAAACAGGATTAGAA<br/> ACCCTAGTAGTCC</p> |
| OTU1145 | <p>GTGGGAATATTGGGCAATGGGCGAAAGCCTGACCCAGCAACGCCCGTGAAGGAAGAAGGCTTCGG<br/> GTTGTAACTTCTTTAAGAGGGACGAAGAAGTACGGTACCTCTTGAATAAGCCACGGCTAACTACGT<br/> GCCAGCAGCCGCGGTAATACGTAGGTGGCAGCGTTATCCGGATTTACTGGGTGTAAAGGGAGCGCAGG<br/> CGGTGCGCAAGTCTGATGTGAAAGCCCGGGCTCAACCCCGTACTGCATTGGAAAAGTGTCTACTAG<br/> AGTGTGCGAGGGTAAGCGGAATTCCTAGTGTAGCGGTGAAATGCGTAGATATTAGGAGGAACACCAGT<br/> GGCGAAGGCGGCTTACTGGACGATAACTGACGCTGAGGCTCGAAAGCGTGGGGAGCAAACAGGATTAG<br/> AAACCTAGTAGTCC</p> |
| OTU1381 | <p>GTGGGAATATTGGGCAATGGGCGAAAGCCTGACCCAGCAACGCCCGTGAAGGAAGAAGGCTTCGG<br/> ATTGTAACTTCTTTATGAGGGACGAAGGACGTGACGGTACCTCATGAATAAGCCACGGCTAACTACGT<br/> GCCAGCAGCCGCGGTAATACGTAGGTGGCAAGCGTTATCCGGATTTACTGGGTGTAAAGGGCGGTAGG<br/> CGGGATGCAAGTCAGATGTGAAATCTATGGGCTTAACCCATAAAGTGCATTGAAAAGTGTATCTTGA<br/> GTGCTGGAGAGGTAGATGGAATTCCTTGTGTAGCGGTGAAATGCGTAGATATAAGGAAGAACCAGTG<br/> GCGAAGGCGATCTACTGGACGTAAGTACGCTGAGGCGGAAAGCGTGGGGAGCAAACAGGATTAGA<br/> AACCTAGTAGTCC</p>   |
| OTU1382 | <p>GTGGGAATATTGGGCAATGGGGAAACCCTGACCCAGCAACGCCCGTGAAGGAAGAAGGCTTCGG<br/> GTTGTAACTTCTTTTACCAGGGACGAAGGAAGTACGGTACCTGGAGAAAAGCCACGGCTAACTACG<br/> TGCCAGCAGCCGCGGTAATACGTAGGTGGCAAGCGTTGTCCGATTTACTGGGTGTAAAGGGCGGTAG<br/> GCGGGACTGCAAGTCTGATGTGAAATCTGGTGGCTCAACCACCAAAGTGCATTGAAAAGTGTAGTCTTG<br/> AGTATCGGAGAGGCAGGCGGAATTCCTAGTGTAGCGGTGAAATGCGTAGATATTAGGAAGAACCAGT<br/> GGCGAAGGCGCCTGCTGGACGACAACTGACGCTGAGGCGGAAAGCGTGGGGAGCAAACAGGATTA<br/> GAAACCCTAGTAGTCC</p>  |
| OTU1387 | <p>GTGGGAATATTGGGCAATGGGGAAACCCTGACCCAGCAACGCCCGTGAAGGAAGAAGGCTTCGG<br/> GTTGTAACTTCTTTTACCAGGGACGAAGGACGTGACGGTACCTGGAGAAAAGCCACGGCTAACTACG<br/> TGCCAGCAGCCGCGGTAATACGTAGGTGGCAAGCGTTGTCCGATTTACTGGGTGTAAAGGGCGGTAG<br/> GCGGAGAAGCAAGTCAGAAGTGAATCCATGGGCTTAACCCATGAACTGCTTTGAAAAGTGTTCCTT<br/> GAGTATCGGAGAGGCAGGCGGAATTCCTAGTGTAGCGGTGAAATGCGTAGATATTAGGAGGAACACCAG<br/> TGCGAAGGCGCCTGCTGGACGACAACTGACGCTGAGGCGGAAAGCGTGGGGAGCAAACAGGATT<br/> AGAAACCCTAGTAGTCC</p>  |
| OTU581  | <p>GTGGGGATATTGCACAATGGAGGAAACTCTGATGCAGCAACGCCCGTGAAGGAAGAAGGCTTCGG<br/> ATTGTAACTTCTTTTGGTGACGAACAATGACGGTAGCCAAAGGGAAGCCACGGCTAACTACGT<br/> GCCAGCAGCCGCGGTAATACGTAGGTGGCAAGCGTTGTCCGATTTACTGGGTGTAAAGGGAGCGCAGG</p>                                                                                                                                                                                                                                                    |

|         |                                                                                                                                                                                                                                                                                                                                                                                                                                                         |
|---------|---------------------------------------------------------------------------------------------------------------------------------------------------------------------------------------------------------------------------------------------------------------------------------------------------------------------------------------------------------------------------------------------------------------------------------------------------------|
|         | CGGGACAGCAAGTTGGATGTGAAATACCGGAGCTTAACCTCCGGAGCTGCATCCAAAAGTGTGTTCTTG<br>AGTGAAGTAGAGGTTGGCGGAATCCGAGTGTAGCGGTGAAATGCGTAGATATTCGGAGGAACACCAGT<br>GGCGAAGGCGGCCAACTGGGCTTAACTGACGCTGAGGCTCGAAAGCATGGGGAGCAAACAGGATTAG<br>ATACCCGAGTAGTCC                                                                                                                                                                                                                 |
| OTU203  | GTGGGAATATTGGCAATGGGCGCAAGCCTGACCCAGCAACGCCGCGTGAAGGAAGAAGGCTTTCGG<br>GTTGTAACTTCTTTAAGAGGGAAGAGCAGAAGACGGTACCTCTAGAATAAGCCACGGCTAACTACGT<br>GCCAGCAGCCGCGTAATACGTAGGTGGCAAGCGTTGTCCGGATTACTGGGTGTAAGGGCGTGCAGC<br>CGGGTCTGCAAGTCAGATGTGAAATCCATGGGCTCAACCCATGAACTGCATTTGAACTGTAGATCTTGA<br>GTGTCGGAGGGCAATCGGAATCCTAGTGTAGCGGTGAAATGCGTAGATATTAGGAGGAACACCAGTG<br>GCGAAGGCGGATTGCTGGACGATAACTGACGGTGAGGCGCAAAGTGTGGGGAGCAAACAGGATTAGA<br>AACCTAGTAGTCC |
| OTU301  | GTGGGAATATTGGCAATGGGCGAAAGCCTGACCCAGCAGCCGCGTGAAGGAAGAAGGCTTTCGG<br>ATTGTAACTTGTAGACAGGAAGAAGAAAGTGACGGTACCTGTAAAGTAAGCCACGGCTAACTACG<br>TGCCAGCAGCCGCGTAATACGTAGGTGGCAAGCGTTATCCGGATTACTGGGTGTAAGGGGTGTAGG<br>CGGGAAACAAGTCAGATGTGAAATGCCAAGGCTAAACCATGGAGCTGCATTTGAACTGTTTTCTTG<br>AGAGTGGGAGAGTAAGCGGAATCCCGGTGTAGCGGTGAAATGCGTAGATATTCGGAGGAACACCAG<br>TGCGAAGGCGGCTTACTGGACCATTACTGACGCTGAGACACGAAAGCGTGGGGAGCAAACAGGATTA<br>GAAACCCAGTAGTCC       |
| OTU334  | GTGGGAATATTGGCAATGGGGCAACCCTGACCCAGCAACGCCGCGTGAAGGAAGAAGGCTTTCGG<br>GTTGTAACTTCTTTGACAAGGGACGAAATAATGACGGTACCTGAAAACAAGCCACGGCTAACTACG<br>TGCCAGCAGCCGCGTAATACGTAGGTGGCAAGCGTTGTCCGGATTACTGGGTGTAAGGGCGGTAG<br>GCGGGTAGGCAAGTCAGATGTGAAATACCGGGCTTAACTCCGGGGTGCATTTGAACTGTTTATCTTG<br>AGTATCGGAGAGGCAGGCGGAATCCTAGTGTAGCGGTGAAATGCGTAGATATTAGGAGGAACACCAGT<br>GGCGAAGGCGCCTGCTGGACGACAAGTACGCTGAGGCGCAAAGCGTGGGGAGCAAACAGGATTA<br>GAAACCCAGTAGTCC      |
| OTU217  | GTGGGAATATTGGCAATGGGGCAACCCTGACCCAGCAACGCCGCGTGAAGGAAGAAGGCTTTCGG<br>GTTGTAACTTCTTTGACTAGGGACGAAAGAATGACGGTACCTAGAAAACAAGCCACGGCTAACTACG<br>TGCCAGCAGCCGCGTAATACGTAGGTGGCAAGCGTTGTCCGGATTACTGGGTGTAAGGGCGGTAG<br>GCGGGACAGCAAGTCAGATGTGAAATCTATGGGCTTAAACCATAAACTGCATTTGAACTGTTTCTTG<br>AGTATCGGAGAGGCAGGCGGAATCCTAGTGTAGCGGTGAAATGCGTAGATATTAGGAGGAACACCAGT<br>GGCGAAGGCGCCTGCTGGACGACAAGTACGCTGAGGCGCAAAGCGTGGGGAGCAAACAGGATTA<br>GAAACCCTGGTAGTCC    |
| OTU1040 | GTGGGGATATTGCACAATGGGGAAACCCTGATGCAGCAGCCGCGTGAAGGAAGAAGGCTTTCGG<br>GTTGTAACTTCTTTCGGGGACGAAATAATGACGGTACCCGAGGAGGAAGCCACGGCTAACTACGT<br>GCCAGCAGCCGCGTAATACGTAGGTGGCAAGCGTTGTCCGGAATTACTGGGTGTAAGGGAGCGTAGG<br>CGGGAGGCAAGTTGAATGTCTAACTATCGGCTCAACTGATAGTCGCGTTCAAAAAGTCCACTCTTGA<br>GTGCAGTAGAGGTAGGCGGAATCCTAGTGTAGCGGTGAAATGCGTAGATATTAGGAGGAACACCAGTG<br>GCGAAGGCGCCTACTGGGCTGAACTGACGCTGAGGCTCGAAAGCGTGGGTAGCAAACAGGATTAGA<br>AACCTAGTAGTCC      |
| OTU1122 | GTGGGGATATTGCGCAATGGGGAAACCCTGACGCAGCAACGCCGCGTGAAGGAAGAAGGCTTTCGG<br>GTTGTAACTTCTTTAAGTGTGGAAGATAATGACGGTACACACAGAATAAGCCACGGCTAACTACGTGCC<br>AGCAGCCGCGTAATACGTAGGTGGCAAGCGTTGTCCGGATTACTGGGTGTAAGGGCGGTAGGCGG<br>GTAGACAAGTCAGATGTGAAATACCGGGCTCAACTCCGGGGTGCATTTGAACTGTATATCTTGTAGTG<br>TCGGAGAGGAAGCGGAATCCTAGTGTAGCGGTGAAATGCGTAGATATTAGGAGGAACACCAGTGCGG                                                                                         |

|         |                                                                                                                                                                                                                                                                                                                                                                                                                                    |
|---------|------------------------------------------------------------------------------------------------------------------------------------------------------------------------------------------------------------------------------------------------------------------------------------------------------------------------------------------------------------------------------------------------------------------------------------|
|         | AAGGCGGCTTCTGGACGATAACTGACGCTGAGGCGCGAAAGCGTGGGGAGCAAACAGGATTAGAAAACCTAGTAGTCC                                                                                                                                                                                                                                                                                                                                                     |
| OTU1293 | GTGGGAATATTGCACAATGGGGAAACCCTGATGCAGCGACGCCGCTGAGGGAAGAAGATTTTCGGATTGTAAACCTCTGTCTTCAGGGACGATAATGACGGTACCTGAGGAGGAAGCCACGGCTAACTACGTGCAGCAGCCGCGTAATACGTAGGTGGCAAGCGTTGTCCGGAATTACTGGGTGTAAAGGGAGCGCAGGGCGGTTTGCAAGTTGGATGTTAATGGAGGGGCTCAACCCCTTCTCGCATTCAAAACTGCAGATCTTGAGTGTGCAGAGGCAGGCGGAATCCCGGTGTAGCGGTGGAATGCGTAGATATCGGGAGGAACACCAGTGGCGAAGGCGCCTGCTGGGCACTAACTGACGCTGAGGCTCGAAAGCATGGGTAGCAAACAGGATTAGATACCCTAGTAGTCC    |
| OTU825  | GTGGGAATATTGCACAATGGGGAAACCCTGATGCAGCGACGCCGCTGGAGGAAGAAGGTCTTCGGATTGTAAACTCCTGTCCCAGGGACGATAATGACGGTACCTGGGAGGAAGCACCGGCTAACTACGTGCAGCAGCCGCGTAAACGTAGGGTGCAAGCGTTGTCCGGAATTACTGGGTGTAAAGGGAGCGCAGGGCGATTGGCAAGTTGGGAGTGAAATCTATGGGCTCAACCCATAAATGCTTTCAAACTGTGAGTCTTGAGTGGTGTAGAGGTAGGCGGAATCCCGGTGTAGCGGTGGAATGCGTAGATATCGGGAGGAACACCAGTGGCGAAGGCGCCTACTGGGCACTAACTGACGCTGAGGCTCGAAAGCATGGGTAGCAAACAGGATTAGAACCCCTAGTAGTCC      |
| OTU828  | GTGGGAATATTGCACAATGGGGAAACCCTGATGCAGCGACGCCGCTGGAGGAAGAAGGTTCCTCGATTGTAAACTCCTGTCTTCGGGACGATAATGACGGTACCCGAGGAGGAAGCCACGGCTAACTACGTGCAGCAGCCGCGTAAACGTAGGTGGCAAGCGTTGTCCGGAATTACTGGGTGTAAAGGGAGCGCAGGGCGGTCGCAAGTTGGAGTGAAAGCTGTGGGCTCAACTCACAAGCTCCCTCAAACTGCCGCTTTGAGTGGTGTAGAGGTAGGCGGAATCCCGGTGTAGCGGTGGAATGCGTAGATATCGGGAGGAACACCAGTGGCGAAGGCGCCTACTGGGCACTAACTGACGCTGAGGCTCGAAAGCATGGGTAGCAAACAGGATTAGATACCCCTAGTAGTCC       |
| OTU251  | GTGGGGATATTGCACAATGGGGAAACCCTGATGCAGCGACGCCGCTGGAGGAAGAAGGTTCCTCGATTGTAAACTCCTGTCTTAGGGACGATAATGACGGTACCTAACAAGAAAGCACCGGCTAACTACGTGCCAGCAGCCGCGTAAACGTAGGGTGCAAGCGTTGTCCGGAATTACTGGGTGTAAAGGGAGCGCAGGGCGGAAGACAAGTTGGAAGTGAAAACCATGGGCTCAACCCATGAATGCTTTCAAACTGTTTTCTTGAGTAGTGCAGAGGTAGATGGAATCCCGGTGTAGCGGTGGAATGCGTAGATATCGGGAGGAACACCAGTGGCGAAGGCGGTCTACTGGGACCAACTGACGCTGAGGCTCGAAAGCATGGGTAGCAAACAGGATTAGAACCCCTAGTAGTCC     |
| OTU380  | GTGGGAATATTAGCAATGGGCGAAAGCCTGACCTAGCGACGCCGCTGAGGGAAGACGGTCTTCGGATTGTAAACCTCTGTCTTCAGGGACGAAGAAGATGACGGTACCTGAAGAGGAAGCCACGGCTAACTACGTGCCAGCAGCCGCGTAATACGTAGGTGGCGAGCGTTGTCCGGAATTACTGGGTGTAAAGGGAGCGTAGGCGGTACGCAAGTTGAATGTGAAAATAACGGCTCAACCGATAGTTGCGTTCAAACTGCGGATCTTGTAGTGAAGTAGAGGCAGGCGGAATCCTAGTGTAGCGGTAAAATGCGTAGATATTAGGAGGAACACCAGTGGCGAAGGCGCCTGCTGGGCTTAACTGACGCTGAGGCTCGAAAGTGTGGGGAGCAAACAGGATTAGAAACCCTAGTAGTCC |
| OTU1190 | GTGGGAATATTAGCAATGGGGAAACCCTGACCTAGCAACGCCGCTGAAGGAAGAAGGCTTCCTCGATTGTAAACTTCTTTACCAGGGACGAAGAAGATGACGGTACCTGGAGAAAAAGCTCCGGCTAACTACGTGCCAGCAGCCGCGTAATACGTAGGGAGCAAGCGTTGTCCGGAATTACTGGGTGTAAAGGGCGTGTAGCGGAGCGCAAGTCAGGAGTGAAATCTTGGGCTCAACCCAGAACTGCTTTGAAACTGTGCCCTTGTAGTATCGGAGAGGCAGGCGGAATCCTTGTGTAGCGGTGAAATGCGTAGATATAAGGAAGAACACCAGTGGCGAAGGCGCCTGCTGGACGACAACCTGACGCTGAGGCGCGAAAGCGTGGGGAGCAAACAGGATTAGATACCCCTAGTAGTCC |

|         |                                                                                                                                                                                                                                                                                                                                                                                                                                                                                   |
|---------|-----------------------------------------------------------------------------------------------------------------------------------------------------------------------------------------------------------------------------------------------------------------------------------------------------------------------------------------------------------------------------------------------------------------------------------------------------------------------------------|
| OTU1187 | <p>GTGGGGGATATTGCACAATGGGCAGAAAGCCTGATGCAGCGACGCCCGTGAGGGAAGACGGCCTTCGG<br/> GTTGTAAACCTCTGTCATTCCGGACGAATATATGACGGTACCGAAGAAGGAAGCTCCGGCTAACTACGTG<br/> CCAGCAGCCCGGTAATACGTAGGGAGCAGCGTTGTCCGGAATTACTGGGTGTAAAGGGAGCGTAGGC<br/> GGGAAAGCAAGTTGGAAGTGAATGCATGGGCTTAACCCATGAGCTGCTTTCAAAAAGTGTCTTTCTTGA<br/> GTGAAGTAGAGGCAGGCGGAATCCTAGTGTAGCGGTGAAATGCGTAGATATTAGGAGAACACCAAGTG<br/> GCGAAGGCGGCCTGCTGGGCTTAACTGACGCTGAGGCTCGAAAGCGTGGGTAGCAAACAGGATTAGA<br/> AACCTAGTAGTCC</p> |
| OTU1136 | <p>GTGGGAATATTGCGCAATGGGGAAACCTGACGCAGCAACGCCCGTGATTGAAGAAGGTCTTCGG<br/> ATTGTAAAATCTTTTATCAAGGACGAAGAAGTGACGGTACTTGATGAATAAGCTCCGGCTAACTACGTG<br/> CCAGCAGCCCGGTAATACGTAGGGAGCAAGCGTTATCCGGATTACTGGGTGTAAAGGGGAGTAGGC<br/> GGATTGGCAAGTTGGGAGTGAATGTCGGGGCTTAACCCGGAAGTCTTCAAAAAGTGTGATCTTGA<br/> GTGATGGAGAGGCAGGCGGAATCCAGTGTAGCGGTGAAATGCGTAGATATTGGGAGAACACCAAGTG<br/> GCGAAGGCGGCCTGCTGGACATTAAGTACGCTGAGGAGCGAAAGCGTGGGGAGCAAACAGGATTAGA<br/> AACCTAGTAGTCC</p>            |
| OTU1134 | <p>GTGGGAATATTGCACAATGGGGAAACCTGATGCAGCGACGCCCGTGAGGGAAGAAGGTTTTTCGG<br/> ATTGTAAACCTCTGCTTTGGTGACGATAATGACGGTAGCCAAAGAGGAAGCTACGGCTAACTACGTGCC<br/> AGCAGCCCGGTAATACGTAGGTGGCAAGCGTTGTCCGGAATTACTGGGTGTAAAGGGAGCGTAGGCCG<br/> GAAGACAAGTTGAATGTTAACTATCGGCTTAACCGTAGTCGCGTTCAAAAAGTGTCTTTCTTGTAGTGA<br/> AGTAGAGGCAGGCGGAATCCTAGTGTAGCGGTGAAATGCGTAGATATTAGGAGAACACCAAGTGCCGA<br/> AGGCGGCCTGCTGGGCTTAACTGACGCTGAGGCTCGAAAGCGTGGGTAGCAAACAGGATTAGAAACC<br/> CGAGTAGTCC</p>       |
| OTU299  | <p>GTGGGAATATTGGGCAATGGGGAAACCTGACCCAGCAACGCCCGTGAAAGGAAGAAGGCTTTCGG<br/> GTTGTAAACTTCTTTTACCAGGACGAAGGACGTGACGGTACCTGGAGAAAAAGCCACGGCTAACTACG<br/> TGCCAGCAGCCCGGTAAAACGTAGGTACAAGCGTTGTCCGGAATTACTGGGTGTAAAGGGAGCGCA<br/> GGCGGAAGACAAGTTGGAAGTGAATCCATGGGCTCAACCCATGAACTGCTTTCAAAAAGTGTCTTTCT<br/> TGAGTAGTGACAGGTAGGCGGAATCCCGGTGTAGCGGTGGAATGCGTAGATATCGGGAGGAACACCA<br/> GTGGCAAGGCGGCCTACTGGGCACCAACTGACGCTGAGGCTCGAAAGTGTGGGTAGCAAACAGGATT<br/> AGATACCCGTGTAGTCC</p>     |
| OTU354  | <p>GTGGGAATATTGGGCAATGGGGAAACCTGACCCAGCAACGCCCGTGAAAGGAAGAAGGCTTTCGG<br/> GTTGTAAACTTCTTTTACCAGGACGAAGAAAGTGACGGTACCTGGAGAAAAAGCCACGGCTAACTACG<br/> TGCCAGCAGCCCGGTAATACGTAGGTGGCAAGCGTTGTCCGGAATTACTGGGTGTAAAGGGCGTGTAG<br/> GCGGAGATGCAAGTCAGATGTGAAATCCTCGGGCTTAACCCGGAAGTGCATTGAAACTGTATCCCTTG<br/> AGTATCGGAGAGGCAGGCGGAATCCTAGTGTAGCGGTGAAATGCGTAGATATTAGGAGAACACCAAGT<br/> GGCGAAGGCGGCCTGCTGGACGACAACTGACGCTGAGGCGGAAAGCGTGGGGAGCAAACAGGATTA<br/> GAAACCTAGTAGTCC</p>     |
| OTU190  | <p>GTGGGAATATTGGGCAATGGGCGAAAGCCTGACCCAGCAACGCCCGTGAAAGGAAGAAGGCTTTCGG<br/> ATTGTAAACTTTTGTCTTATGGGACGATAATGACGGTACCATAAGGAGGAAGCCACGACTAACTACGTGCC<br/> AGCAGTCGCGGTAATACGTAGGTGGCGAGCGTTATCCGGAATTATTGGGTGTAAAGGGTGCCTAGGCGG<br/> GATGTAAAGTCAGATGTGAAATGCCGCGGCTCAACCCGAGGACTGCATTGAAACTTATGTTCTTGTAGTG<br/> AAGTAGAGGTAAGCGGAATCCTAGTGTAGCGGTGAAATGCGTAGATATTAGGAGAACACCGGTGGCG<br/> AAGGCGGCTTACTGGGCTTAGACTGACGCTGAGGCGGAAAGTGTGGGGAGCAAACAGGATTAGAAAC<br/> CCTAGTAGTCC</p> |
| OTU193  | <p>GTGGGGGATATTGCACAATGGGGAAACCTGATGCAGCGACGCCCGTGAGGGAAGACGGTCTCTG<br/> GATTGTAAACCTCTGCTTCCGGGACGAAACGAGACGGTACCCGAGGAGGAAGCCACGGCTAACTACGT</p>                                                                                                                                                                                                                                                                                                                                 |

|         |                                                                                                                                                                                                                                                                                                                                                                                                                                                    |
|---------|----------------------------------------------------------------------------------------------------------------------------------------------------------------------------------------------------------------------------------------------------------------------------------------------------------------------------------------------------------------------------------------------------------------------------------------------------|
|         | GCCAGCAGCCGCGTAATACGTAGGTGGCAAGCGTTGTCCGGAATTAAGGGAGCGTAGG<br>CGGGCAGGCAAGTCAGGCGTGAATATATCGGCTCAACCGGTAACGGCGCTTGAACTGCAGGTCTTGA<br>GTGAAGTAGAGGTTGGCGGAATTCCTAGTGTAGCGGTGAAATGCGTAGATATTAGGAGGAACACCAAGT<br>GCGAAGGCGGCCAACTGGGCTTTTACTGACGCTGAGGCTCGAAAGTGTGGGGAGCAACAGGATTAGA<br>AACCTAGTAGTCC                                                                                                                                                 |
| OTU198  | GTGGGAATATTGCACAATGGAGGAACTCTGATGCAGCGACGCCGCTGAGGGAAGAAGGCTTCGG<br>ATTGTAACTCTGTTGTCAGGGACGATGATGACGGTACCTGACGAGGAAGCCACGGCTAACTACGTGC<br>CAGCAGCCGCGTAAAACGTAGGTGGCAAGCGTTGTCCGGAATTAAGGGAGCGCAGGC<br>GGGAGAGCAAGTTGGGAGTGAATCTGTGGGCTCAACCCACAAATTGCTTTCAAACTGTTTTCTTGA<br>GTGGTGTAGAGGTAGGCGGAATCCCGTGTAGCGGTGGAATGCGTAGATATCGGGAGGAACACCAAGT<br>GCGAAGGCGGCTACTGGGCACTAACTGACGCTGAGGCTCGAAAGCATGGGTAGCAACAGGATTAGA<br>AACCTAGTAGTCC           |
| OTU314  | GTGGGAATATTGGCAATGGGCGAAAGCCTGACCCAGCAACGCCGCTGAAGGAAGAAGGCCTTCGG<br>GTTGTAACTCTTTAAGAGGGACGAAGAAGTACGGTACCTCTTGAATAAGCCACGGCTAACTACGT<br>GCCAGCAGCCGCGTAATACGTAGGTGGCGAGCGTTATCCGATTTACTGGGTGTAAGGGCGCGTAGG<br>CGGAATGCAAGTCAGATGTGAAATCCAAGGGCTCAACCTTGAATGCAATTTGAACTGTATTCTTGA<br>GTGTCGGAGAGGTTGACGGAATTCCTAGTGTAGCGGTGAAATGCGTAGATATTAGGAGGAACACCAAGT<br>GCGAAGGCGGCTAACTGGACGATAACTGACGCTGAGGCGGAAAGCGTGGGGAGCAACAGGATTAGA<br>AACCTAGTAGTCC |
| OTU1306 | GTGGGAATATTGCGCAATGGGGAAACCTGACGCAGCAACGCCGCTGATTGAAGAAGGCCTTCGG<br>GTTGTAAAGATCTTAAATCAGGGACGAAAAATGACGGTACCTGAAGAATAAGCTCCGGCTAACTACGTGC<br>CAGCAGCCGCGTAATACGTAGGGAGCAAGCGTTATCCGATTTACTGGGTGTAAGGGCGCGCAGGCG<br>GGCCGCAAGTTGGAAGTGAATCCGGGGCTTAACCCCGAACTGCTTCAAACTGCTGGTCTTGAG<br>TGATGGAGAGGCAAGCGGAATCCCGTGTAGCGGTGAAATGCGTAGATATACGGAGGAACACCAAGTGG<br>CGAAGGCGGCTGCTGGACATTAAGTACGCTGAGGCGGAAAGCGTGGGGAGCAACAGGATTAGAT<br>ACCCTGTAGTCC    |
| OTU1309 | GTGGGAATATTGCGCAATGGGGCAACCTGACGCAGCAACGCCGCTGATTGATGAAGGCTTCGGA<br>TTGTAAAATCTTAAATCAGGGACGAAGAAAATGACGGTACCTGAAGAATAAGCTCCGGCTAACTACGT<br>GCCAGCAGCCGCGTAATACGTAGGGAGCAAGCGTTATCCGATTTACTGGGTGTAAGGGCGGTGATAGG<br>CGGGCTTCAAGTTGGAAGTGAATCTCGGGCTTAACCCCGAACTGCTTCAAACTGCGAGTCTTG<br>AGTGTAGGAGAGGCAAGCGGAATCCAGTGTAGCGGTGAAATGCGTAGATATTGGGAGGAACACCAAGT<br>GGCGAAGGCGGCTGCTGGACATTAAGTACGCTGAGGCGGAAAGCGTGGGGAGCAACAGGATTAG<br>AACCTAGTAGTCC   |
| OTU1282 | GTGGGAATATTGCACAATGGGCGCAAGCCTGATGCAGCAACGCCGCTGAAGGAAGACGGTTTCGG<br>ATTGTAACTCTGTTCTTAGTGAAGAATAATGACGGTAGCTAAGGAGCAAGCCACGGCTAACTACGTGC<br>CAGCAGCCGCGTAATACGTAGGTGGCAAGCGTTGTCCGGAATTAAGGGAGCGCAGGCG<br>GGTGATCAAGTCAGCTGTGAAAATATGGGCTTAACCCGTAGACTGCAGTTGAACTGTTTACTTTGAGT<br>GAAGTAGAGGTTGGCGGAATCCAGTGTAGCGGTGAAATGCGTAGATATTGGGAGGAACACCGGTGGC<br>GAAGGCGGCCAACTGGGCTTAACTGACGCTGAGGCTCGAAAGTGTGGGGAGCAACAGGATTAGAAA<br>CCCGAGTAGTCC       |
| OTU63   | GTGGGAATATTGGCAATGGGGAAACCTGACCCAGCAGCGCGCTGAGGGAAGACGGTCTTCGG<br>ATTGTAACTCTTTCAGCAGGGAAGAAGAAGTACGGTACCTGCAGAAGAAGCCACGGCTAACTACGT<br>GCCAGCAGCCGCGTAATACGTAGGTGGCAAGCGTTATCCGATTTACTGGGTGTAAGGGTGTGTAGGC<br>GGGACTGCAAGTCAGACGTGAAAATCATGGGCTCAACCCATGACTTGCCTTTGAACTGCGGTTCTTGA                                                                                                                                                                |

|         |                                                                                                                                                                                                                                                                                                                                                                                                                                                           |
|---------|-----------------------------------------------------------------------------------------------------------------------------------------------------------------------------------------------------------------------------------------------------------------------------------------------------------------------------------------------------------------------------------------------------------------------------------------------------------|
|         | GAGTGGGAGAGGTAACCGAATTCCTGGTGTAGCGGTGAAATGCGTAGATATCAGGAGGAACACCGGTG<br>GCGAAGGCGGTTTACTGGACCACAACCTGACGCTGAGACACGAAAGCGTGGGGAGCAAACAGGATTAGA<br>AACCTAGTAGTCC                                                                                                                                                                                                                                                                                            |
| OTU773  | GTGGGAATATTGGCAATGGGGAAACCCTGACCCAGCAACGCCCGGTGAAGGAAGAAGGCTTTCGG<br>GTTGTAACCTCTTTTACCAGGGACGAAGGACGTGACGGTACCTGGAGAAAAAGCCACGGCTAACTACG<br>TGCCAGCAGCCGCGTAATACGTAGGTGGCAAGCGTTGTCCGGATTACTGGGTGTAAGGGCGGTAG<br>GCGGGAGAGCAAGTCAGAAGTGAATCTATGGGCTTAACCCATAAACTGCTTTTGAACCTGTTCTTCTG<br>AGTATCGGAGAGGACGGCGAATTCCTAGTGTAGCGGTGAAATGCGTAGATATTAAGGAAACACCACT<br>GGCGAAGGCGGCTGCTGGACGACAACCTGACGCTGAGGCGGAAAGCGTGGGGAGCAAACAGGATTA<br>GAAACCCTAGTAGTCC   |
| OTU223  | GTGGGGATATTGACAATGGGGAAACCCTGATGCAGCAGCCCGGTGAGGGAAGACGGTTTTCGG<br>ATTGTAACCTCTGTCTTTAGGGACGAAAAATGACGGTACCTAAGGAGGAAGCCACGGCTAACTACGT<br>GCCAGCAGCCGCGTAATACGTAGGTGGCAAGCGTTGTCCGGAATTACTGGGTGTAAGGGAGCGTAGG<br>CGGGGAGACAAGTTGAATGTCTAACTATCGGCTTAACTGATAGTCGCGTTCAAACCTATCACTCTGAG<br>TGCAGTAGAGGTAGGCGAATTCCTAGTGTAGCGGTGAAATGCGTAGATATTAAGGAAACACCACTGG<br>CGAAGGCGGCTACTGGGCTGTAACCTGACGCTGAGGCTCGAAAGCGTGGGTAGCAAACAGGATTAGAA<br>ACCCTAGTAGTCC     |
| OTU1075 | GTGGGAATATTGACAATGGGGAAACCCTGATGCAGCAACGCCCGGTGAAGGATGACGGTTTTCGGA<br>TTGTAACCTCTTTTCTTAGTGACGAAGACAGTACGGTAGCTAAGGAATAAGCATCGGCTAACTACGTG<br>CCAGCAGCCGCGTAATACGTAGGTGCAAGCGTTATCCGGATTACTGGGTGTAAGGGAGCGCAGGC<br>GGGACTGCAAGTTGGATGTGAAATACCGTGGCTTAAACCGGAACTGCATCCAAACTGTAGTTCTTGA<br>GTGAAGTAGAGGCAAGCGAATTCAGTGTAGCGGTGAAATGCGTAGATATTCGGAGGAACACCACTG<br>GCGAAGGCGGCTTCTGGGCTTAACTGACGCTGAGGCTCGAAAGTGTGGGGAGCAAACAGGATTAGA<br>AACCTAGTAGTCC       |
| OTU412  | GTGGGAATATTGACAATGGGGAAACCCTGATGCAGCAATGCCCGGTGAAGGATGAAGGTTTTCGGA<br>TTGTAACCTCTTTTGTACGGGACGAAACAAATGACGGTACCCTAAGGAATAAGCCACGGCTAACTACGTG<br>CCAGCAGCCGCGTAATACGTAGGTGGCAAGCGTTATCCGGATTACTGGGTGTAAGGGGAGTAGGC<br>GGGATTGCAAGTCAGATGTGAAAACCTATGGGCTCAACCCATAGACTGCATTTGAACTGTAGTTCTGAG<br>TGATGGAGAGGCAAGCGAATTCAGGCTGAGCGGTGGAATGCGTAGATATTCGGAGGAACACCACTGG<br>CGAAGGCGGCTGCTGGACATTAACCTGACGCTGAGGCGGAAAGCGTGGGGAGCAAACAGGATTAGAA<br>ACCCTAGTAGTCC |
| OTU1071 | GTGGGAATATTAGCAATGGGGGAACCCTGACCTAGCAGCAGCCCGGTGAGGGAAGACGGTTTTCGG<br>ATTGTAACCTCTGTCTTTGGGACGAAAAGAATGACGGTACCCGAAGAGGAAGCCACGGCTAACTACG<br>TGCCAGCAGCCGCGTAATACGTAGGTGGCAGCGTTGTCCGGAATTACTGGGTGTAAGGGGAGCGTAG<br>GCGGGTGTGCAAGTTGAATGTGAAAGGTATCAGCTCAACTGATACATGCGATCAAAAACCTGCAGATCTG<br>AGTGAAGTAGAGGACGGCGAATTCCTAGTGTAGCGGTAAATGCGTAGATATTAAGGAAACACCACT<br>GGCGAAGGCGGCTGCTGGGCTTAACTGACGCTGAGGCTCGAAAGTGTGGGGAGCAAACAGGATTAG<br>AAACCCTGTAGTCC  |
| OTU720  | GTGGGGATATTGCGCAATGGGGCAACCCTGACCGAGCAACGCCCGGTGAAGGATGAAGGTTTTCGG<br>ATTGTAACCTCTTTTATTAAGGACGAAAATGACGGTACTTAATGAATAAGCTCCGGCTAACTACGTGCC<br>AGCAGCCGCGTAAACGTAGGGTGCAAGCGTTGTCCGGAATTACTGGGTGTAAGGGAGCGCAGGCG<br>GACCCGCAAGTTGGAAGTGAACCTATGGGCTCAACCCATAAATTGCTTTCAAACCTGCTGGCCTTGG<br>TAGTGCAGAGGTAGGTGGAATTCAGGCTGAGCGGTGGAATGCGTAGATATTCGGAGGAACACCACTGG<br>CGAAGGCGACCTACTGGGACCAACTGACGCTGAGGCTCGAAAGCATGGGTAGCAAACAGGATTAGAA                    |

|         |                                                                                                                                                                                                                                                                                                                                                                                                                                                                  |
|---------|------------------------------------------------------------------------------------------------------------------------------------------------------------------------------------------------------------------------------------------------------------------------------------------------------------------------------------------------------------------------------------------------------------------------------------------------------------------|
|         | ACCCTAGTAGTCC                                                                                                                                                                                                                                                                                                                                                                                                                                                    |
| OTU627  | GTGGGGAATATTGCACAATGGGCGAAAGCCTGATGCAGCAACGCCGCGTGAGGGAAGACGGTTTTTCGG<br>ATTGTAAACCTCTGTTTTCGGTGACGAACAAATGACGGTAACCGAGTAGGAAGCCACGGCTAACTACGT<br>GCCAGCAGCCGCGGTAATACGTAGGTGGCAAGCGTTATCCGGAATTACTGGGTGTAAAGGGAGCGCAGG<br>CGGGATAGCAAGTCAGCTGTGAAAATATGGGCTCAACCCATAAACTGCAGTTGAAACTGTTATCTTGA<br>GTGGAGTAGAGGCAAGCGGAATTCGAGTGTAGCGGTGAAATGCGTAGATATTCGGAGGAACACCAGTG<br>GCGAAGGCGGCTTGTGGGCTCTAACTGACGCTGAGGCTCGAAAGTGTGGGGAGCAAACAGGATTAGA<br>AACCTAGTAGTCC  |
| OTU619  | GTGGGGAATATTGGGCAATGGGCGAAAGCCTGACCCAGCAACGCCGCGTGAAGGAAGAAGGCTTTCGG<br>GTTGTAAACTTCTTTTATCAGGGACGAAGGATGTGACGGTACCTGATGAATAAGCCACGGCTAACTACGT<br>GCCAGCAGCCGCGGTAATACGTAGGTGGCAAGCGTTGTCCGATTACTGGGTGTAAAGGGAGCGTAGG<br>CGGAGAGACAAGTCAGATGTGAAATCTATGGGCTTAACCCATAAACTGCATTTGAAACTATCTCCCTGA<br>GTGATGGAGAGGCAAGCGGAATTCCTAGTGTAGCGGTGAAATGCGTAGATATTAGGAGGAACACCAGTG<br>GCGAAGGCGGCTTGTGGACATTAAGTACGCTGAGGCGCGAAAGCGTGGGGAGCAAACAGGATTAGA<br>AACCCCTGTAGTCC  |
| OTU839  | GTGGGGGATATTGCACAATGGGCGAAAGCCTGATGCAGCGACGCCGCGTGAGGGAAGACGGTCTTCGG<br>ATTGTAAACCTCTGTCTTCAGGGACGAAGGAATGACGGTACCTGAGGAGGAAGCCACGGCTAACTACG<br>TGCCAGCAGCCGCGGTAATACGTAGGTGGCAAGCGTTGTCCGGAATTACTGGGTGTAAAGGGAGCGTAG<br>GCGGGGATGCAAGTTGAATGTTAAACTATCGGCTCAACTGATAGTCGCGTTCAAAAAGTCAACTCTTGA<br>GTGAAGTAGAGGTAGGCGGAATTCCTAGTGTAGCGGTGAAATGCGTAGATATTAGGAGGAACACCAGTG<br>GCGAAGGCGGCTTACTGGGCTTTACTGACGCTGAGGCTCGAAAGCATGGGGAGCAAACAGGATTAGAT<br>ACCCTAGTAGTCC |
| OTU1007 | GTGGGGAATATTGCACAATGGGGGAAACCTGATGCAGCAACGCCGCGTGAGGGAAGAAGGTTTTTCGG<br>ATTGTAAACCTCTGTCCCTGGTGACGAAGACAGTGACGGTAACCAGGGAGGAAGCCACGGCTAACTACG<br>TGCCAGCAGCCGCGGTAATACGTAGGTGGCAAGCGTTGTCCGATTACTGGGTATAAAGGGAGCGCAG<br>GCGGGAGAGCAAGTCAGCGGTGAAATACATGGGCTTAACCCATGAACTGCCGTTGAAACTGTTTTCTT<br>GAGTGAAGTAGAGGCAGGCGGAATTCGAGTGTAGCGGTGAAATGCGTAGATATTCGGAGGAACACCA<br>GTGGCGAAGGCGGCTGCTGGGCTTTACTGACGCTGAGGCTCGAAAGCGTGGGGAGCAAACAGGATT<br>AGAAACCCGAGTAGTCC   |
| OTU1345 | GTGGGGGATATTGCACAATGGGGGAAACCTGATGCAGCGACGCCGCGTGGAGGAAGACGGCCTTCGG<br>GTTGTAAACTCTGTCTTCAGGGACGAAACTGACGGTACCTGAGGAGGAAGCACCGGCTAACTACGTGC<br>CAGCAGCCGCGGTAATACGTAGGGTGCAAGCGTTGTCCGGAATTACTGGGTGTAAAGGGAGCGTAGGCG<br>GGTCAGCAAGTTGGATGTGAAATGTACCGGCTCAACTGGTAAACTGCATTCAAAAGTGTGGTCTTGTAG<br>TGAAGTAGAGGCAGGCGGAATTCCTAGTGTAGCGGTGAAATGCGTAGATATTAGGAGGAACACCAGTGG<br>CGAAGGCGGCTGCTGGGCTTTACTGACGCTGAGGCTCGAAAGCATGGGGAGCAAACAGGATTAGAA<br>ACCCTAGTAGTCC    |
| OTU265  | GTGGGGAATATTGGGCAATGGGCGAAAGCCTGACCCAGCGACGCCGCGTGAAGGAAGAAGGCTTTCGG<br>ATTGTAAACTTCTGTTATGGGGACGAACACATGACGGTACCCATGAGAAAGCCACGGCTAACTACGTG<br>CCAGCAGCCGCGGTAATACGTAGGTGGCAGCGTTATCCGGAATTACTGGGTGTAAAGGGTGTAGGCG<br>GGACTGCAAGTCAGATGTGAAAATATGGGCTCAACTCATAGCTTGCATTTGAAACTGTGGTCTTGTAGG<br>GTCGGAGAGGTAAGTGAATCCCGGTGTAGCGGTGAAATGCGTAGATATTCGGAGGAACACCAGTGGC<br>GAAGGCGAGTTACTGGACGATACCTGACGCTGAGACACGAAAGTGTGGGGAGCAAACAGGATTAGATA<br>CCCTAGTAGTCC      |
| OTU596  | GTGGGGAATATTGGGCAATGGGCGAAAGCCTGACCCAGCGACGCCGCGTGAGGGAAGAAGGCTTTCGG                                                                                                                                                                                                                                                                                                                                                                                             |



|        |                                                                                                                                                                                                                                                                                                                                                                                                                                                                               |
|--------|-------------------------------------------------------------------------------------------------------------------------------------------------------------------------------------------------------------------------------------------------------------------------------------------------------------------------------------------------------------------------------------------------------------------------------------------------------------------------------|
|        | <p>ATTGTAAACCTTTGTAAGCAGGGAAGAAAGAAAGTGACGGTACCTGCAGAGTAAGCCACGGCTAACTACG<br/> TGCCAGCAGCCGCGTAATACGTAGGTGGCAAGCGTTATCCGGAATTACTGGGCGTAAAGGGTGTGTAG<br/> GCGGGAAGACAAGTCAGATGTGAAAATCATGGGCTTAACCCATGACCTGCATTTGAAACTGTTTTCTTG<br/> AGGATGGGAGAGGTAAATGGAATCCCGGTGTAGCGGTGAAATGCGTAGATATCGGGAGGAACACCAGT<br/> GGCGAAGGCGGTTTACTGGACATTACTGACGCTGAGACACGAAAGCGTGGGAGCAAACAGGATTAG<br/> AAACCCGGTAGTCC</p>                                                                      |
| OTU599 | <p>GTGGGAATATTGGCAATGGGCGAAAGCCTGACCCAGCAGCCGCGTGAAGGAAGAAGGCCCTCGG<br/> GTTGTAAACTTCAGTCAACAGGGAAGAAACAAATGACGGTACCTGTGGAGGAAGCCACGGCTAACTAC<br/> GTGCCAGCAGCCGCGTAATACGTAGGTGGCAAGCGTTATCCGATTACTGGGTGTAAAGGGTGTGTAG<br/> GCGGGTCTGCAAGTCAGATGTGAAAATGAGGCTCAACTCATAGCTGCATTTGAAACTGTGGATCTTG<br/> AGTGTGCGGAGAGGTAAATGGAATCCCGGTGTAGAGGTGAAATTCGTAGATATCGGGAGGAACACCAGT<br/> GGCGAAGGCGGTTTACTGGACGATTACTGACGCTGAGACACGAAAGTGTGGGAGCAAACAGGATTAG<br/> AAACCCAGTAGTCC</p>   |
| OTU26  | <p>GTGGGAATATTGCACAATGGGGAAACCCTGATGCAGCAACGCCGCGTGAAGGAAGACGGTTTTTCGG<br/> ATTGTAACTTCTGTCTTAGTGAAGAATAATGACGGTAGCTAAGGAGCAAGCCACGGCTAACTACGTGC<br/> CAGCAGCCGCGTAATACGTAGGTGGCAAGCGTTGTCCGGAATTACTGGGTGTAAAGGGAGCGTAGGCG<br/> GGATGCCAAGTCAGCTGTGAAAATGAGGCTAACCTGTAGACTGCAGTTGAAACTGGTATTCTTGAGT<br/> GAAGTAGAGGTTGGCGGAATCCGAGTGTAGCGGTGAAATGCGTAGATATCGGAGGAACACCGGTGGC<br/> GAAGGCGGCCAACTGGGCTTAACTGACGCTGAGGCTCGAAAGTGTGGGAGCAAACAGGATTAGAAA<br/> CCCTAGTAGTCC</p>    |
| OTU694 | <p>GTGGGAATATTGCACAATGGGGGAAACCCTGATGCAGCAGCCGCGTGAAGGAAGAAGGTTTTTCGG<br/> ATTGTAACTTCTGTCTTAGTGAAGAATAATGACGGTAGCTAAGGAGCAAGCCACGGCTAACTACGTGC<br/> CAGCAGCCGCGTAATACGTAGGTGGCAAGCGTTGTCCGGAATTACTGGGTGTAAAGGGAGCGTAGGCG<br/> GGAAGACAAGTTGGGAGTGAATGTATGGGCTTAACCCATAAACTGCTTTCAAACACTGTTTTCTTGAGT<br/> GAAGTAGAGGCGAGCGGAATCCCTAGTGTAGCGGTGAAATGCGTAAATATTAGGAGGAACACCAGTGGC<br/> GAAGGCGGCTGCTGGGCTTAACTGACGCTGAGGCTCGAAAGCGTGGGTAGCAAACAGGATTAGAAA<br/> CCCTAGTAGTCC</p> |
| OTU212 | <p>GTGAGGAATATTGGCAATGGGCGCAAGCCTGACCCAGCAACGCCGCGTGAAGGAAGACGGTTTTTCGG<br/> ATTGTAACTTCTTTAAGAGGGACGATAATGACGGTACCTCTTGAATAAGCCACGGCTAACTACGTGCC<br/> AGCAGCCGCGTAATACGTAGGTGGCAAGCGTTGTCCGATTACTGGGTGTAAAGGGGAGTAGGCGG<br/> GATATCAAGTCAGGTGTGAAATCCATGGGCTCAACCCATGAACTGCACTGAAACTGATATTCTTGAGTG<br/> ATGGAGAGGCAGGCGGAATCCCGGTGTAGCGGTGGAATGCGTAGATATCGGGAGGAACACCAGTGGCG<br/> AAGGCGCCTGCTGGACATTAAGTACGCTGAGGAGCGAAAGCGTGGGAGCAAACAGGATTAGAAA<br/> CCCTAGTAGTCC</p>     |
| OTU602 | <p>GTGGGGATATTGCACAATGGGGAAACCCTGATGCAGCAGCCGCGTGGAGGAAGAAGGTTTTTCGG<br/> ATTGTAACTCTGTCTTAGGACGATAATGACGGTACCTAACAAGAAAGCACCGGCTAACTACGTGCC<br/> AGCAGCCGCGTAAACGTAGGTGCAAGCGTTGTCCGGAATTACTGGGTGTAAAGGGAGCGCAGGCG<br/> GACCGCAAGTTGGAAGTGAACACTATGGGCTCAACCCATAAATGCTTTCAAACACTGCTGGCCTGAG<br/> TAGTGCAGAGGTAGGTGGAATCCCGGTGTAGCGGTGGAATGCGTAGATATCGGGAGGAACACCAGTGG<br/> CGAAGGCGACCTACTGGCACCAACTGACGCTGAGGCTCGAAAGCATGGGTAGCAAACAGGATTAGAA<br/> ACCCTAGTAGTCC</p>        |
| OTU289 | <p>GTGGGAATATTGCACAATGGGGGAAACCCTGATGCAGCAGCCGCGTGGAGGAAGAAGGTTTCGG<br/> ATTGTAACTCTGTGTGAGGAAGATAATGACGGTACTCAACAAGGAAGTGACGGCTAACTACGTGC<br/> CAGCAGCCGCGTAAACGTAGGTACAAGCGTTGTCCGGAATTACTGGGTGTAAAGGGCGTGTAGCCG</p>                                                                                                                                                                                                                                                        |

|         |                                                                                                                                                                                                                                                                                                                                                                                                                                                            |
|---------|------------------------------------------------------------------------------------------------------------------------------------------------------------------------------------------------------------------------------------------------------------------------------------------------------------------------------------------------------------------------------------------------------------------------------------------------------------|
|         | GGAGGGCAAGTCAGATGTGAAATCCACGGGCTCAACTCGTGAACCTGCAATTTGAAACTACTCTTCTTGAG<br>TATCGGAGAGGCAATCGGAATTCCTAGTGTAGCGGTGAAATGCGTAGATATTAGGAGGAACACCAGTGGC<br>GAAGGCGGATTGCTGGACGACAACCTGACGGTGAGGCGCGAAAGCGTGGGGAGCAAACAGGATTAGAA<br>ACCCGAGTAGTCC                                                                                                                                                                                                                 |
| OTU297  | GTGGGGATATTGCGCAATGGGGGAACCTGACGCAGCAACGCCGCGTGAAGGAAGAAGGTTTCGG<br>ATCGTAACTTCTTAAGTGTGGAAGAAGATGACGGTACACACAGAATAAGCCACGGCTAACTACGTGC<br>CAGCAGCCGCGTAATACGTAGGTGGCGAGCGTTGTCCGATTACTGGGTGTAAGGGCGTGTAGGCG<br>GGTTGTCAAGTCAGATGTGAAATACCGGGCTTAACCCCGAGCTGCATTGAAACTGACAGTCTTGAG<br>TGCCGAGAGGAAAGCGGAATTCCTAGTGTAGCGGTGAAATGCGTAGATATTAGGAGGAACACCAGTGG<br>CGAAGGCGGCTTCTGGACGGTAACTGACGCTGAGGCGCGAAAGCATGGGGAGCAAACAGGATTAGAA<br>ACCCTAGTAGTCC         |
| OTU1380 | GTGGGAATATTGGGCAATGGGCGAAGCCTGACCCAGCGACGCCGCGTGAAGGAAGAAGGTTTCGG<br>ATTGTAACTTTGTAGACAGGAAGAAGCAAGTACGGTACCTGTAAGTAAGCCACGGCTAACTACG<br>TGCCAGCAGCCGCGTAATACGTAGGTGGCGAGCGTTATCCGATTACTGGGTGTAAGGGTGTGTAGG<br>CGGGATTGCAAGTCAGATGTGAAATACCGAGGCTCAACTTCGGGGCTGCATTGAAACTGTAATCTTGA<br>GAGTGGGAGAGGTAAGCGGAATTCGGGTGTAGCGGTGAAATGCGTAGATATCGGGAGGAACACCAGT<br>GGCGAAGGCGGTTACTGGACCATTACTGACGCTGAGACACGAAAGCGTGGGGAGCAAACAGGATTAG<br>AAACCCTAGTAGTCC       |
| OTU1192 | GTGGGAATATTGGGCAATGGGCGAAAGCCTGACCCAGCGACGCCGCGTGAAGGAAGAAGGCTTCGG<br>GTTGTAACTTTAGTAAGCAGGAAGAAGAAAGTACGGTACCTGCAGAGTAAGCCACGGCTAACTACG<br>TGCCAGCAGCCGCGTAATACGTAGGTGGCGAGCGTTATCCGGAATTACTGGGTGTAAGGGTGTGTAG<br>GCGGGACTTCAAGTCAGATGTGAAAATTGCGGGCTCAACCCGCAACCTGCATTGAAACTGAGGTTCTT<br>GAGAGTCGGAGAGGTAATGGAATTCGGGTGTAGCGGTGAAATGCGTAGATATCGGGAGGAACACCAG<br>TGCCGAAGGCGATTACTGGACGACAACCTGACGCTGAGACACGAAAGCGTGGGGAGCAAACAGGATTA<br>GAAACCCTAGTAGTCC |
| OTU1217 | GTGGGAATATTGGGCAATGGGCGAAGCCTGACCCAGCGACGCCGCGTGAAGGAAGACGGTTCCTCGG<br>ATTGTAACTCTTTCAGCAGGAAGAAGCAAGTACGGTACCTGCAGAGAAGTACCGGCTAACTACG<br>TGCCAGCAGCCGCGTAATACGTAGGTGGCGAGCGTTATCCGGAATTACTGGGTGTAAGGGTGTGTAG<br>GCGGGGAAAGCAAGTCAGATGTGAAAACCAAAGGCTCAACCTTGGCTTGCATTGAAACTGTTTTCTT<br>GAGAGTGGGAGAGGTAACGGAATTCCTAGTGTAGTAGTAAATGCGTAGATATTAGGAGGAACACCGG<br>TGCCGAAGGCGTTACTGGACCACAACCTGACGCTGAGACACGAAAGCGTGGGGAGCAAACAGGATTA<br>GAAACCCTAGTAGTCC    |
| OTU177  | GTGGGAATATTGCGCAATGGGGAAACCTGACGCAGCAACGCCGCGTGATTGAAGAAGGCTTCGG<br>GTTGTAAAGATCTTAATCAGGGACGAAAAATGACGGTACCTGAAGAATAAGCTCCGGCTAACTACGTGC<br>CAGCAGCCGCGTAATACGTAGGAGCAAGCGTTATCCGATTACTGGGTGTAAGGGCGCGCAGGCG<br>GGCCGCAAGTTGGAAGTGAATCCGGGGCTTAACCCCGAACTGCTTCAAACCTGCTGGTCTTGAG<br>TGATGGAGAGGAGGCGGAATTCGGTGTAGCGGTGAAATGCGTAGATATACGGAGGAACACCAGTGG<br>CGAAGGCGGCTGCTGGACATTAACCTGACGCTGAGGCGCGAAAGCGTGGGGAGCAAACAGGATTAGAA<br>ACCCTAGTAGTCC           |
| OTU425  | GTGGGAATATTGCGCAATGGGGAAACCTGACGCAGCAACGCCGCGTGAAGGAAGAAGGTTTCGG<br>ATTGTAACTTTGTCTTATGGGAAGAACAAGGACGGTACCATAGGAGGAAGCCACGGCTAACTACGTG<br>CCAGCAGCCGCGTAATACGTAGGTGGCAAGCGTTGTCCGATTACTGGGTGTAAGGGCGGTGTAGGC<br>GGGTAGGTAAGTCAGATGTGAAATACCGGGCTCAACCCCGAGCTGCATTGAAACTGCTTATCTTGAG<br>TATCGGAGAGGAAGCGGAATTCAGTGTAGCGGTGAAATGCGTAGATATTGGGAGGAACACCAGTGG                                                                                                 |

|         |                                                                                                                                                                                                                                                                                                                                                                                                                                                                 |
|---------|-----------------------------------------------------------------------------------------------------------------------------------------------------------------------------------------------------------------------------------------------------------------------------------------------------------------------------------------------------------------------------------------------------------------------------------------------------------------|
|         | CGAAGGCGGCTTTCTGGACGACAACCTGACGCTGAGGCGGAAAGCGTGGGTAGCAAACAGGATTAGAT<br>ACCCCTGTAGTCC                                                                                                                                                                                                                                                                                                                                                                           |
| OTU1070 | GTGGGGAATATTGCACAATGGGGGAAACCCTGATGCAGCGACCCGCGTGAGGGAAGAAGGTTTCGG<br>ATTGTAAACCTCTGTCTTGGTGACGAAAATGACGGTAGCCAAGGAGGAAGCCACGGCTAACTACGTGC<br>CAGCAGCCCGGTAATACGTAGGTGGCAAGCGTTGTCCGGAATTACTGGGTGTAAAGGGAGCGTAGGCG<br>GGAAGATAAGTTGGACGTCTAATCTATCGGCTCAACCGATAGTCGCGTTCAAAAAGTGTTCCTTGTAGTG<br>AAGTAGAGGTAAGCGGAATTCCTAGTGTAGCGGTGAAATGCGTAAATATTAGGAGGAACACCAGTGGCG<br>AAGGCGGCTTACTGGGCTTAACTGACGCTGAGGCTCGAAAGCGTGGGTAGCAAACAGGATTAGAAAC<br>CCGAGTAGTCC     |
| OTU959  | GTGGGGGATATTGCACAATGGAGGAAACTCTGATGCAGCAACGCCGCGTGAGGGAAGAAGGTTTCGG<br>ATTGTAAACCTCTGTTTTAGTGAAGAAACAATGACGGTAGCTAAAGAGGAAGCCACGGCTAACTACG<br>TGCCAGCAGCCCGGTAATACGTAGGTGGCAAGCGTTGTCCGGAATTACTGGGTGTAAAGGGTGCAG<br>GCGGGATTGCAAGTTGGATGTGAAATACCGGGGCTTAACCCCGAGCTGCATCCAAAAGTGTAGTCTTG<br>AGTGGAGTAGAGGTAAGCGGAATCCGAGTGTAGCGGTGAAATGCGTAGATATTCGGAGGAACACCAGT<br>GGCGAAGGCGGCTTACTGGGCTCTAACTGACGCTGAGGCACGAAAGCATGGGTAGCAAACAGGATTAG<br>ATACCCTAGTAGTCC     |
| OTU955  | GTGGGGGATATTGCACAATGGGGGAAACCCTGATGCAGCGACCCGCGTGAAGGAAGAAGGCTTTCGG<br>GTCGTAAACTTCTGTTTTAGGGAAGATAATGACGGTACCTGAAGAGGAAGCCACGGCTAACTACGTGC<br>CAGCAGCCCGGTAATACGTAGGTGGCGAGCGTTGTCCGGAATTACTGGGTGTAAAGGGTGCAGTAGGCG<br>GGACGGTAAGTCAGCTGTGAAAGGTACAGGCTCAACCTGTGCACTGCAGTTGAAACTGCTGTTCTTGTAG<br>TAGAGGAGAGGTAACCGGAATCCAGTGTAGCGGTGGAATGCGTAGATATTGGGAGGAACACCAGTGG<br>CGAAGGCGGTTTACTGGACTCTAACTGACGCTGAAGCACGAAAGCGTGGGGAGCAAACAGGATTAGAA<br>ACCCCTAGTAGTCC |
| OTU957  | GTGGGGAATATTGGCAATGGGGGAAACCCTGACCCAGCAACGCCGCGTGAAGGAAGAAGGCTTTCGG<br>GTTGTAAACTTCTTTTAGCAGGGACGAAGGACGTGACGGTACCTGCAGAAAAAGCAACGGCTAACTACG<br>TGCCAGCAGCCCGGTAATACGTAGGTGCAAGCGTTGTCCGGAATTACTGGGTGTAAAGGGCGGTAG<br>GCGGAGCTGCAAGTCAGATGTGAAATCCCGGGGCTCAACCCGGAACTGCATTTGAAACTGTAGCCCTT<br>GAGTATCGGAGAGGCAAGCGGAATTCCTAGTGTAGCGGTGAAATGCGTAGATATTAGGAGGAACACCAG<br>TGCGGAAGGCGGCTTGTGTGACGACAACCTGACGCTGAGGCGGAAAGCGTGGGGAGCAAACAGGATTA<br>GAAACCTTGTAGTCC  |
| OTU1082 | GTCGGGAATATTGCGCAATGGAGGAAACTCTGACGCAAGTACGCCGCGTGCAAGGAAGAAGGTTTCGG<br>ATTGTAAACTGCTTTAGACAGGGGAAAGAAACAAGACAGTACCTGTAGAATAAGCTCCGGCTAACTACGTG<br>CCAGCAGCCCGGTAATACGTAGGATGCAAGCGTTATCCGGATTTACTGGGTGTAAAGGGAGCGCAGGC<br>GGGACTGCAAGTTGGATGTGAAATACCGTGGCTTAACCACGGAAGTGCATCCAAAAGTGTAGTCTTGA<br>GTGAAGTAGAGGCAAGCGGAATTCGAGTGTAGCGGTGAAATGCGTAGATATTCGGAGGAACACCAGT<br>GCGAAGGCGGCTTGTGGGCTTAACTGACGCTGAGGCTCGAAAGTGTGGGGAGCAAACAGGATTAGA<br>AACCCCTAGTAGTCC |
| OTU1089 | GTGGGGAATATTGCACAATGGGGGAAACCCTGATGCAGCGACCCGCGTGAGGGAAGACGGTTTCGG<br>ATTGTAAACCTCTGTCTTGTGGACGATAGTACGGTACCACAGGAGGAAGCCATGGCTAACTACGTGCC<br>AGCAGCCCGGTAATACGTAGATGGCAGCGTTGTCCGGAATTACTGGGTGTAAAGGGAGTGTAGGCGG<br>GCTGGTAAGTTGAATGTGAAACCTTCGGGCTCAACCCGGAGCGTGCFTCAAAAAGTGTGGTCTTGTAGT<br>GAAAGTAGAGGCAAGCGGAATTCGCGTGTAGCGGTGGAATGCGTAGATATTCGGAGGAACACCAGTGG<br>CGAAGGCGGCTTGTGGGCTTTACTGACGCTGAGGCTCGAAAGCATGGGTAGCAAACAGGATTAGAAA<br>CCCTAGTAGTCC       |

|         |                                                                                                                                                                                                                                                                                                                                                                                                                                                                                     |
|---------|-------------------------------------------------------------------------------------------------------------------------------------------------------------------------------------------------------------------------------------------------------------------------------------------------------------------------------------------------------------------------------------------------------------------------------------------------------------------------------------|
| OTU1163 | <p>GTGGGGAATATTGGGCAATGGACGAAAGTCTGACCCAGCGACGCCGCGTGAGGGAAGAAGGTCTTCGG<br/> ATTGTAACCTTAGTCAACAGGGAAGAAGAAAGTGACGGTACCTGTGGAGGAAGCCACGGCTAACTAC<br/> GTGCCAGCAGCCGCGTAATACGTAGGTGGCGAGCGTTATCCGGATTACTGGGTGTAAAGGGTGTGTAG<br/> GCGGGAAGGCAAGTCAGATGTGAAAATATGGGCTCAACCCATAGCCTGCATTGAAAAGTGTTCCTTCTG<br/> AGAGTCGGAGAGGTAAGTGAATCCCGGTGTAGCGGTGAAATGCGTAGATATCGGGAGGAACATCTGT<br/> GGCGAAGGCGACTTACTGGACGATTACTGACGCTGAGACACGAAAGCGTGGGGAGCAAACAGGATTAG<br/> AAACCTAGTAGTCC</p>    |
| OTU492  | <p>GTGGGGAATATTGGGCAATGGACGGAAGTCTGACCCAGCGACGCCGCGTGAGGGAAGAAGGTCTTCGG<br/> ATTGTAACCTTAGTAAGCAGGGAAGAAGAAAGTGACGGTACCTGCAGAGTAAGCCACGGCTAACTACG<br/> TGCCAGCAGCCGCGTAATACGTAGGTGGCGAGCGTTATCCGGAATTACTGGGTGTAAAGGGTGTGTAG<br/> GCGGGACGACAAGTCAGATGTGAAAATTGACAGGCTCAACCTGGAAAGTGCATTGAAAAGTCCGCTTCTT<br/> GAGAGTCGGAGAGGTAATGGAATCCCGGTGTAGCGGTGAAATGCGTAGATATCGGGAGGAACACCAG<br/> TGGCGAAGGCGATTACTGGACGACAACCTGACGCTGAGACACGAAAGCGTGGGGAGCAAACAGGATTA<br/> GAAACCTAGTAGTCC</p> |
| OTU1073 | <p>GTGGGGAATATTGGGCAATGGGGAAACCTGACCCAGCAACGCCGCGTGAAAGGAAGAAGGCCTTCGG<br/> GTTGTAACCTCTTTTACCAGGGACGAAGGACGTGACGGTACCTGGAGAAAAGCAACGGCTAACTACG<br/> TGCCAGCAGCCGCGTAATACGTAGGTGCAAGCGTTGTCCGGATTACTGGGTGTAAAGGGCGTGTAG<br/> GCGGAGATGCAAGTTGGGAGTGAAATCCATGGGCTCAACCCATGAACTGCTCTCAAAGTGTATCCCTT<br/> GAGTATCGGAGAGGCAAGCGGAATCCTAGTGTAGCGGTGAAATGCGTAGATATTAGGAGGAACACCAG<br/> TGGCGAAGGCGGCTTGTGGACGACAACCTGACGCTGAGGCGGAAAGCGTGGGGAGCAAACAGGATTA<br/> GAAACCTAGTAGTCC</p>       |
| OTU1395 | <p>GTGGGGAATATTGGGCAATGGGGAAACCTGACCCAGCAACGCCGCGTGAGGGAAGAAGGTCTTCGG<br/> ATTGTAACCTCTTTTACCAGGGAAGAAGAAAGTGACGGTACCTGGAGAAAAGCCACGGCTAACTACG<br/> TGCCAGCAGCCGCGTAATACGTAGGTGGCAAGCGTTGTCCGGATTACTGGGTGTAAAGGGCGTGTAG<br/> GCGGGAAGACAGGTCAGATGTGAAATGTCGGGGCTCAACCCGAACTGCATTGAAAACCGTTCCTTCTT<br/> GAGTATCGGAGAGGCAAGCGGAATCCTAGTGTAGCGGTGAAATGCGTAGATATTAGGAGGAACACCAG<br/> TGGCGAAGGCGGCTTGTGGACGACAACCTGACGCTGAGGCGGAAAGCGTGGGGAGCAAACAGGATT<br/> AGATACCCTAGTAGTCC</p>      |
| OTU60   | <p>GTGGGGAATATTGGGCAATGGGCGAAAGCCTGACCCAGCGACGCCGCGTGAGGGAAGAAGGTCTTCGG<br/> ATTGTAACCTTAAACAACAGGGACGAAGAAGTGACGGTACCTGTTAGGAAGCCACGGCTAACTACGTG<br/> CCAGCAGCCGCGTAATACGTAGGTGGCGAGCGTTATCCGGATTACTGGGTGTAAAGGGTGTGTAGGCG<br/> GAGGAGCAAGTCAGGCGTGGAAATTACGGGCTCAACCCGTAACCTGCGCTTAAAAGTGTTCCTTCTGAG<br/> TGTCGGAGAGGTAATGGAATCCAGTGTAGCGGTGAAATGCGTAGATATTGGGAGGAACACCGGTGG<br/> CGAAGGCGGTTTACTGGACGACAACCTGACGCTGAGACACGAAAGTGTGGGGAGCAAACAGGATTAGAA<br/> ACCCCGTAGTCC</p>     |
| OTU429  | <p>GTGGGGAATATTGGGCAATGGACGGAAGTCTGACCCAGCGACGCCGCGTGAGGGAAGAAGGTCTTCGG<br/> ATTGTAACCTTAGTAAGCAGGGAAGAAGAAAGTGACGGTACCTGCAGAGTAAGCCACGGCTAACTACG<br/> TGCCAGCAGCCGCGTAATACGTAGGTGGCGAGCGTTATCCGGAATTACTGGGTGTAAAGGGTGTGTAG<br/> GCGGGACGACAAGTCAGATGTGAAAATTGACAGGCTCAACCTGGAAAGTGCATTGAAAAGTCCGCTTCTT<br/> GAGAGTCGGAGAGGTAATGGAATCCCGGTGTAGCGGTGAAATGCGTAGATATCGGGAGGAACACCAG<br/> TGGCGAAGGCGATTACTGGACGACAACCTGACGCTGAGACACGAAAGCGTGGGGAGCAAACAGGATTA<br/> GAAACCTAGTAGTCC</p> |
| OTU1059 | <p>GTGGGGAATATTGCACAATGGGGAAACCTGATGCAGCAACGCCGCGTGAAAGGAAGACGGTCTTCGG<br/> ATTGTAACCTTTTGTCTTGGTGAAGAAAATGACGGTAGCCAAGGAGGAAGCCACGGCTAACTACGTG</p>                                                                                                                                                                                                                                                                                                                                 |

|                            |         |                                                                                                                                                                                                                                                                                                                                                                                                                                                                      |
|----------------------------|---------|----------------------------------------------------------------------------------------------------------------------------------------------------------------------------------------------------------------------------------------------------------------------------------------------------------------------------------------------------------------------------------------------------------------------------------------------------------------------|
|                            |         | CCAGCAGCCGCGTAATACGTAGGTGGCAAGCGTTGTCCGGAATTACTGGGTGTAAAGGGAGCGCAGGC<br>GGGAAATCAAGTTGGATGTGAAATGTCCGGGCTTAACCCCGAACTGCATCCAAAATGATATTCTTGAG<br>TGAAGTAGAGGTAGGCGGAATCCGAGTGTAGCGGTGAAATGCGTAGATATCCGGAGGAACACCAAGTGG<br>CGAAGGCGGCCTACTGGGCTTAACTGACGCTGAGGCTCGAAAGTGTGGGGAGCAAAACAGGATTAGAA<br>ACCCTAGTAGTCC                                                                                                                                                       |
|                            | OTU1062 | GTGGGGATATTGCACAATGGGC GCAAGCCTGATGCAGCGACGCCGCGTGTGGAAAGACGGCCCTCGG<br>GTTGTAAACCACTGGCTTTGGGGACGATAATGACGGTACCCAAGGAGGAAGCTCCGGCTAACTACGTGC<br>CAGCAGCCGCGTAATACGTAGGAGCGAGCGTTGTCCGGAATTACTGGGTGTAAAGGGAGCGTAGGCG<br>GGAGTGCAAGTTGAATGTTAATCTATGGGCTCAACCCATATCAGCGTTCAAAATGCATTTCTTGAGTG<br>AAGTAGAGGTGGCGGAATCCTAGTGTAGCGGTGAAATGCGTAGATATTAGGAGGAACACCAAGTGGCG<br>AAGGCGGCCAACTGGGCTTTACTGACGCTGAGGCTCGAAAGCGTGGGGAGCAAAACAGGATTAGAAAC<br>CCGGGTAGTCC          |
|                            | OTU1207 | GTGGGAATATTGGCAATGGGC GAAAGCCTGACCCAGCGACGCCGCGTGTGGGAAGAAGGTCTTCGG<br>ATTGTAAACCTCTTTCAGCAGGGGAAGAAGAAAGTGACGGTACCTGCAGAAGAAGTACGGCTAACTAC<br>GTGCCAGCAGCCGCGTAATACGTAGGTGGCAGCGTTATCCGGAATTACTGGGTGTAAAGGGTGTGTA<br>GGCGGGGTGTCAAGTCAGATGTGAAAACCTGTGGGCTCAACCCACAAAATGCATTTGAAACTGATACTCT<br>TGAGAGTGGGAGAGGTAAACGGAATCCTGGTGTAGTAGTAAATGCGTAGATATCAGGAGGAACACCG<br>GTGGCGAAGGCGGTTTACTGGACCACAACTGACGCTGAGACACGAAAGCGTGGGGAGCAAAACAGGATT<br>AGAAACCCCTAGTAGTCC   |
|                            | OTU1206 | GTGGGAATATTGGCAATGGGC GAAAGCCTGACCCAGCGACGCCGCGTGTGGGAAGAAGGTCTTCGG<br>ATTGTAAACCTCTGTGACAGGGGAAGAAGAAAGTGACGGTACCTGTGAGGAAGTACGGCTAACTACG<br>TGCCAGCAGCCGCGTAATACGTAGGTGGCAAGCGTTATCCGATTTACTGGGTGTAAAGGGTGTGATAGG<br>CGGGACGACAAGTCAGATGTGAAAACCTCATGGGCTCAACCCATGACCTGCATTTGAAACTGCCGTTCTTG<br>AGAGTCGGAGAGGTAAATGGAATCCCGGTGTAGCGGTGAAATGCGTAGATATCGGGAGGAACACCAAGT<br>GGCGAAGGCGATTTACTGGACGACCACTGACGCTGAGACACGAAAGCGTGGGGAGCAAAACAGGATTAG<br>AAACCCCTAGTAGTCC |
|                            | OTU453  | GTGGGAATATTGGCAATGGGC GAAAGCCTGACCCAGCAACGCCGCGTGAAGGAAGAAGGTCTTCGG<br>ATTGTAAACTTTGTCTTATGGACGATAATGACGGTACCATAGGAGGAAGCCACGACTAACTACGTGCC<br>AGCAGTCGCGGTAATACGTAGGTGGCAGCGTTATCCGGAATTATTGGGTGTAAAGGGTGCCTAGGCGG<br>GTCGTAAAGTCAGATGTGAAATGCGGAGGCTCAACCTCCGAACTGCATTTGAAACTTACGATCTTGAGT<br>GGAGTAGAGGAAGCGGAATCCCGGTGTAGCGGTGAAATGCATAGATATCGGGAGGAACACCAAGTGGC<br>GAAGGCGGCTTGCTGGGCTTTTACTGACGCTGAGGCACGAAAGTGTGGGGAGCAAAACAGGATTAGAAA<br>CCCTAGTAGTCC        |
| Roseburia<br>faecis        | OTU1283 | GTGGGAATATTGCACAATGGGC GAAAGCCTGATGCAGCGACGCCGCGTGTGGGAAGAAGTATTTCGGT<br>ATGTAAAGCTCTATCAGCAGGGGAAGATAATGACGGTACCTGACTAAGAAGCACCGGCTAAATACGTGCC<br>AGCAGCCGCGGTAATACGTATGGTGCAAGCGTTATCCGATTTACTGGGTGTAAAGGGAGCGCAGGCGG<br>TGCGCAAGTCTGATGTGAAAGCCGGGGCTCAACCCGGTACTGCATTGGAAACTGTCGTACTAGAGT<br>GTCGGAGGGTAAGCGGAATCCTAGTGTAGCGGTGAAATGCGTAGATATTAGGAGGAACACCAAGTGGC<br>GAAGGCGGCTTACTGGACGATAACTGACGCTGAGGCTCGAAAGCGTGGGGAGCAAAACAGGATTAGAAA<br>CCCTAGTAGTCC       |
| Enterobacteria<br>ceae_unc | OTU814  | GTGGGAATATTGCACAATGGGC GCAAGCCTGATGCAGCCATGCCGCGTGTATGAAGAAGCCTTCGGG<br>TTGTAAAGTACTTTCAGCGGGGAGGAAGGGAGTAAAGTTAATACCTTTGCTCATTGACGTTACTCGCAGA<br>AGAAGCACCGGCTAACTCCGTGCCAGCAGCCGCGTAATACGGAGGGTGAAGCGTTAATCGGAATTAC<br>TGGCGTAAAGCGCACGAGGCGGTTTGTAAAGTCAGATGTGAAATCCCGGGCTCAACCTGGGAACTG                                                                                                                                                                          |

|                   |         |                                                                                                                                                                                                                                                                                                                                                                                                                                                                                     |
|-------------------|---------|-------------------------------------------------------------------------------------------------------------------------------------------------------------------------------------------------------------------------------------------------------------------------------------------------------------------------------------------------------------------------------------------------------------------------------------------------------------------------------------|
|                   |         | CATCTGATACTGGCAAGCTTGAGTCTCGTAGAGGGGGGTAGAATCCAGGTGTAGCGGTGAAATGCGTA<br>GAGATCTGGAGGAATACCGGTGGCGAAGGCGGCCCTGGACGAAGACTGACGCTCAGGTGCGAAAGC<br>GTGGGGAGCAAACAGGATTAGAAACCCAGTAGTCC                                                                                                                                                                                                                                                                                                   |
|                   | OTU1114 | GTGAGGAATATTGCACAATGGGC GCAAGCCTGATGCAGCCATGCCGCGTGTATGAAGAAGGCCTTCGGG<br>TTGTAAAGTACTTTCAGCGGGGAGGAAGGGAGTAAAGTTAATACCTTTGCTCATTGACGTTACCCGAG<br>AGAAGCACCGGCTAACTCCGTGCCAGCAGCCGCGTAATACGGAGGGTGAAGCGTTAATCGGAATTAC<br>TGGGCGTAAAGCGCACGCAGGCGGTTTGTAAAGTCAGATGTGAAATCCCCGGGCTCAACCTGGGAACTG<br>CATCTGATACTGGCAAGCTTGAGTCTCGTAGAGGGGGGTAGAATCCAGGTGTAGCGGTGAAATGCGTA<br>GAGATCTGGAGGAATACCGGTGGCGAAGGCGGCCCTGGACGAAGACTGACGCTCAGGTGCGAAAGC<br>GTGGGGAGCAAACAGGATTAGAAACCCAGTAGTCC |
|                   | OTU23   | GTGGGAATATTGCACAATGGGC GCAAGCCTGATGCAGCCATGCCGCGTGTATGAAGAAGGCCTTCGGG<br>TTGTAAAGTACTTTCAGCGGGGAGGAAGGGAGTAAAGTTAATACCTTTGCTCATTGACGTTACCCGAG<br>AGAAGCACCGGCTAACTCCGTGCCAGCAGCCGCGTAATACGGAGGGTGAAGCGTTAATCGGAATTAC<br>TGGGCGTAAAGCGCACGCAGGCGGTTTGTAAAGTCAGATGTGAAATCCCCGGGCTCAACCTGGGAACTG<br>CATTCGAACTGGCAGGCTAGAGTCTTGTAGAGGGGGGTAGAATCCAGGTGTAGCGGTGAAATGCGTA<br>GAGATCTGGAGGAATACCGGTGGCGAAGGCGGCCCTGGACAAAGACTGACGCTCAGGTGCGAAAGC<br>GTGGGGAGCAAACAGGATTAGATACCCAGTAGTCC   |
|                   | OTU1275 | GTGGGAATATTGCACAATGGGC GCAAGCCTGATGCAGCCATGCCGCGTGTATGAAGAAGGCCTTCGGG<br>TTGTAAAGTACTTTCAGCGGGGAGGAAGGTGTGTGGTTAATAACCGCAGCAATTGACGTTACCCGAG<br>AAGAAGCACCGGCTAACTCCGTGCCAGCAGCCGCGTAATACGGAGGGTGAAGCGTTAATCGGAATTAC<br>CTGGGCGTAAAGCGCACGCAGGCGGTTTGTAAAGTCAGATGTGAAATCCCCGGGCTCAACCTGGGAACT<br>GCATCTGATACTGGCAGGCTTGAGTCTCGTAGAGGGGGGTAGAATCCAGGTGTAGCGGTGAAATGCGT<br>AGAGATCTGGAGGAATACCGGTGGCGAAGGCGGCCCTGGACGAAGACTGACGCTCAGGTGCGAAAG<br>CGTGGGGAGCAAACAGGATTAGATACCCAGTAGTCC |
|                   | OTU890  | GTGGGAATATTGCACAATGGGC GCAAGCCTGATGCAGCCATGCCGCGTGTATGAAGAAGGCCTTCGGG<br>TTGTAAAGTACTTTCAGCGGGGAGGAAGGGAGTAAAGTTAATACCTTTGCTCATTGACGTTACCCGAG<br>AGAAGCACCGGCTAACTCCGTGCCAGCAGCCGCGTAATACGGAGGGTGAAGCGTTAATCGGAATTAC<br>TGGGCGTAAAGCGCACGCAGGCGGTTTGTAAAGTCAGATGTGAAATCCCCGGGCTCAACCTGGGAACTG<br>CATCTGATACTGGCAAGCTTGAGTCTCGTAGAGGGGGGTAGAATCCAGGTGTAGCGGTGAAATGCGTA<br>GAGATCTGGAGGAATACCGGTGGCGAAGGCGGCCCTGGACGAAGACTGACGCTCAGGTGCGAAAGC<br>GTGGGGAGCAAACAGGATTAGAAACCCAGTAGTCC  |
| Ruminococcus_ unc | OTU1232 | GTGGGGATATTGCACAATGGGC GAAAGCCTGATGCAGCAACGCCGCGTGAGGGAAGACGGTTTTTCGG<br>ATTGTAAACCTCTGTCTAAGTGACGAACAATGACGGTAGCTTAGGAGAAAGCCCGGCTAACTACGT<br>GCCAGCAGCCGCGTAATACGTAGGGGGCAAGCGTTGTCCGAATTACTGGGTGTAAGGGAGCGCAG<br>GCGGAGAAGCAAGTCAGTGGTGAACGATGGGCTTAACCTCATCGACTGCCATTGAAACTGTTCCCTT<br>GAGTGAAGTAGAGGCAGGCGGAATCCGAGTGTAGCGGTGAAATGCGTAGATATTCGGAGGAACACCA<br>GTGGCGAAGGCGGCTGCTGGGCTTAACTGACGCTGAGGCTCGAAAGTGTGGGGAGCAAACAGGATT<br>AGAAACCCAGTAGTCC                            |
|                   | OTU56   | GTGAGGGATATTGGTCAATGGGGGAAACCTGAACCAGCAACGCCGCGTGAGGGAAGACGGTTTTTCGG<br>ATTGTAAACCTCTGTCTCTGTGAAGATAGTACGGTAGCAGAGGAGGAAGCTCCGGCTAACTACGTGC<br>CAGCAGCCGCGTAATACGTAGGAGCGAGCGTTGTCCGATTACTGGGTGTAAGGGTGCAGTAGGCG<br>GCTCTGCAAGTCAGAAGTGAATCCATGGGCTTAAACCATGAACTGCTTTTGAAACTGTAGAGCTTGAG<br>TGAAGTAGAGGTAGGCGGAATCCCGGTGTAGCGGTGAAATGCGTAGAGATCGGGAGGAACACCAAGT<br>GCGAAGGCGGCTACTGGGCTTAACTGACGCTGAGGCACGAAAGCATGGGTAGCAAACAGGATTAGA                                               |

|         |                                                                                                                                                                                                                                                                                                                                                                                                                                                                             |
|---------|-----------------------------------------------------------------------------------------------------------------------------------------------------------------------------------------------------------------------------------------------------------------------------------------------------------------------------------------------------------------------------------------------------------------------------------------------------------------------------|
|         | AACCTAGTAGTCC                                                                                                                                                                                                                                                                                                                                                                                                                                                               |
| OTU470  | GTGGGAATATTGCACAATGGAGGAACTCTGATGCAGCGATGCCCGTGGAGGAAGAAGTTCGGA<br>TTGTAACTCCTTTATCAGGGACGATAATGACGGTACCTGAAGAAAAAGCTCCGGCTAACTACGTGCCA<br>GCAGCCCGGTAATACGTAGGGAGCGAGCGTTGTCCGGAATTACTGGGTGTAAGGGAGCGTAGGGGG<br>ATAGCAAGTCAGATGTGAAAATATGGGCTCAACCTGTAGATTGCATTGAAAAGTGTGTTCTTGAGTGA<br>AGTAGAGGTAAGCGGAATTCCTAGTGTAGCGGTGAAATGCGTAGATATTAGGAGGAACATCGGTGGCGA<br>AGGGCGCTTACTGGCTTTTACTGACGCTGAGGCTCGAAAGCGTGGGGAGCAAACAGGATTAGAAAAC<br>CTAGTAGTCC                         |
| OTU1055 | GTGGGGATATTGCACAATGGGGAAACCCTGATGCAGCAACGCCGTGAGGGAAGAAGTTCGCG<br>ATTGTAACTCTGTCTTAGTGAAGATAATGACGGTAGCTAAGGAGGAAGCTCCGGCTAACTACGTGCC<br>AGCAGCCCGGTAATACGTAGGGAGCGAGCGTTGTCCGGAATTACTGGGTGTAAGGGTGCAGGGCGG<br>CAAGGCAAGTCAGCAGTAAAATCCATGGGCTTAACCCATGACGTGCTGTTGAAAAGTGTGTTGCTTGAGT<br>GAAGTAGAGGCGAGCGGAATCCCGGTGTAGCGGTGAAATGCGTAGAGATCGGGAGGAACACCAGTGG<br>CGAAGGCGGCTGCTGGGCTTAACTGACGCTGATGCACGAAAGTGTGGGTAGCAAACAGGATTAGATA<br>CCCTAGTAGTCC                         |
| OTU448  | GTGAGGAATATTGGTCAATGGGCGGAGCCTGAACCAGCCAAGTAGCGTGGAGGATGAATGCCCTACGG<br>GTTGTAACTCCTTTTGGCGGAGGATAAAGATTGCCACGTGTGGCAAGTGCAGGTATCCGCCGAATAAG<br>GGCCGGCTAATCCGTGCCAGCAGCCCGGTAATACGGAAGGCCCGAGCGTTATCCGGATTATTTGGGTT<br>TAAAGGGAGCGTAGGGGGAGATCAAGTCAGCTGTGAAAAGTGCAGCGCTCAACGGCGCCGAGCAGTTG<br>AAACTGGTTTCTTGAGTCCGCAAGAGGCGCGTGAATTCGTGGTGTAGCGGTGAAATGCATAGATATCA<br>CGAAGAACTCCGATTGCGAAGGCAGCGCTGGGGCGTCACTGACGCTGAAGCTCGAAGGTGCGGGTA<br>TCGAACAGGATTAGAAAACCCCGTAGTCC |
| OTU444  | GTGGGGATATTGCACAATGGGGAAACCCTGATGCAGCGACGCCGTGTGGGAAGACGGTCTCTGG<br>ATTGTAACTCCTCAGGGACGAAAGATGACGGTACCTGAGGAGGAAGCTCCGGCTAACTACGTGC<br>CAGCAGCCCGGTAATACGTAGGGAGCGAGCGTTGTCCGGAATTACTGGGTGTAAGGGAGCGTAGGGC<br>GGGACGCAAGTTGGATGTGAAATCTACCGGCTCAACTGGTAGCTGCATTAAAAGTGCAGCTTGTGAGT<br>GGAGTAGAGGCAAGCGGAATTCCTAGTGTAGCGGTGAAATGCGTAGATATTAGGAGGAACACCAGTGGC<br>GAAGGCGGCTGCTGGGCTTTTACTGACGCTGAGGCTCGAAAGTGTGGGGAGCAAACAGGATTAGAAA<br>CCCCAGTAGTCC                         |
| OTU578  | GTGGGAATATTGCACAATGGAGGAACTCTGATGCAGCGATGCCCGTGGAGGAAGAAGTTCGGA<br>TTGTAACTCCTGTCTCAGGGACGATAATGACGGTACCTGAGGAGGAAGCTCCGGCTAACTACGTGCC<br>AGCAGCCCGGTAATACGTAGGGAGCGAGCGTTGTCCGGAATTACTGGGTGTAAGGGAGCGTAGGGC<br>GATCTTAAGTCAGGTGTGAAAATATGGGCTCAACCCATAGACTGCACTGAAAAGTGAAGTTCCTGAGT<br>AAGTAGAGGCAAGCGGAATTCCTAGTGTAGCGGTGAAATGCGTAGATATTAGGAGGAACATCAGTGGC<br>AAGGCGGCTGCTGGGCTTTTACTGACGCTGAGGCTCGAAAGCGTGGGGAGCAAACAGGATTAGATACC<br>CTAGTAGTCC                          |
| OTU300  | GTGGGGATATTGCACAATGGGGAAACCCTGATGCAGCAACGCCGTGTGGGAAGAAGTTCGCG<br>ATTGTAACTCCTGTTCTTAGCGAAGAAACAATGACGGTAACTAAGAAGAAAGCTCCGGCTAACTACG<br>TGCCAGCAGCCCGGTAATACGTAGGGAGCGAGCGTTGTCCGGAATTACTGGGTGTAAGGGTGCAGT<br>GCGGGCCCGCAAGTCAGACGTGAAAGCCACAGGCTCAACCTGTGAATTGCGTTGAAAAGTGTGGGTCTT<br>GAGTGAAGTAGAGGTAGCGGAATCCCGGTGTAGCGGTGAAATGCGTAGAGATCGGGAGGAACACCA<br>GTGGCGAAGGCGGCTACTGGGCTTAACTGACGCTGAGGCACGAAAGCGTGGGTAGCAAACAGGATT<br>AGAAACCCTAGTAGTCC                       |
| OTU579  | GTGGGGATATTGCACAATGGGGAAACCCTGATGCAGCAATGCCCGTGGAGGAAGAAGTTCGCG                                                                                                                                                                                                                                                                                                                                                                                                             |

|         |                                                                                                                                                                                                                                                                                                                                                                                                                                                                                     |
|---------|-------------------------------------------------------------------------------------------------------------------------------------------------------------------------------------------------------------------------------------------------------------------------------------------------------------------------------------------------------------------------------------------------------------------------------------------------------------------------------------|
|         | <p>ATTGTA AACCTAAGTAGCCAGGGACGATAATGACGGTACCTGGAGAGTAAGCTCCGGCTAACTACGTGCC<br/> AGCAGCCCGGTAATACGTAGGGAGCGAGCGTTGTCCGGATTACTGGGTGTA AAGGGTGC GTAGGCGG<br/> GATGGCAAGTCAGATGTGAAATACCGGGGCTTAACCCCGGGGCTGCATTGAAACTGTCGTTCTTGAGT<br/> GAAGTAGAGGCAGGCGGAATTCCTAGTGTAGCGGTGAAATGCGTAGATATTAGGAGGAACACCAGTGGC<br/> GAAGGCGGCCTGCTGGGCTTAACTGACGCTGAGGCACGAAAGCATGGGGAGCA AACAGGATTAGAAA<br/> CCCTAGTAGTCC</p>                                                                          |
| OTU402  | <p>GTGGGGGATATTGCACAATGGAGGAACTCTGATGCAGCAACGCCCGGTGAGGGAAGAAGGTTTTCGG<br/> ATTGTA AACCTCTGTCTTCGGTGACGATAATGACGGTAGCCGAGGAGGAAGCTCCGGCTAACTACGTGCC<br/> AGCAGCCCGGTAATACGTAGGGAGCGAGCGTTGTCCGGAATTACTGGGTGTA AAGGGTGC GTAGGCGG<br/> GAAAGCAAGTCAGGCGTAAAACTATCGGCTTAACTGGTAGACTGCGTTGAAACTGTTTTCTTGAGT<br/> GAAGTAGAGGTAGGCGGAATCCCGGTGTAGCGGTGGAATGCGTAGAGATCGGGAGGAACACCAGTGG<br/> CGAAGGCGGCCTACTGGGCTTAACTGACGCTGAGGCACGAAAGCATGGGTAGCA AACAGGATTAGAA<br/> ACCCTAGTAGTCC</p>   |
| OTU1165 | <p>GTGGGGGATATTGCACAATGGGGAAACCCTGATGCAGCAACGCCCGGTGAGGGAAGAAGGTTTTCGG<br/> ATTGTA AACCTCTGTCTTAGTGACGATAATGACGGTAGCTAAGGAGAAAGCTCCGGCTAACTACGTGCC<br/> AGCAGCCCGGTAATACGTAGGGAGCGAGCGTTGTCCGGATTACTGGGTGTA AAGGGTGC GTAGGCGG<br/> CGAGGCAAGTCAGGCGTAAATCTATGGGCTTAACCCATAAACTGCGCTGAAACTGCTTGCTTGAGTG<br/> AAGTAGAGGTAGGCGGAATCCCGGTGTAGCGGTGAAATGCGTAGAGATCGGGAGGAACACCAGTGGC<br/> GAAGGCGGCCTACTGGGCTTAACTGACGCTGAAGCACGAAAGCATGGGTAGCA AACAGGATTAGAAA<br/> CCCTAGTAGTCC</p>     |
| OTU1042 | <p>GTGGGAATATTGCACAATGGGGAAACCCTGATGCAGCAGCGCCCGGTGAGGGAAGAAGGTTTTCGG<br/> ATTGTA AACCTCTGTCTTCAGGGACGATAGTGACGGTACCTGAGGAGGAAGCTCCGGCTAACTACGTGC<br/> CAGCAGCCCGGTAATACGTAGGGAGCGAGCGTTGTCCGGAATTACTGGGTGTA AAGGGAGCGTAGGCG<br/> GGACAGCAAGTTGAATGTGAAATCTATGGGCTCAACCCATAAACTGCGTTCAAAACTGTTGTTCTTGAGT<br/> GAAGTAGAGGTAGGCGGAATTCCTAGTGTAGCGGTGAAATGCGTAGATATTAGGAGGAACACCAGTGGC<br/> GAAGGCGGCCTACTGGGCTTAACTGACGCTGAGGCTCGAAAGCGTGGGTAGCA AACAGGATTAGAAA<br/> CCCTAGTAGTCC</p> |
| OTU333  | <p>GTGGGGGATATTGCGCAATGGGGAAACCCTGACGCAGCAACGCCCGGTGAAGGATGAAGGTCTTCGG<br/> ATTGTA AACCTCTTTTATTAAGGACGAAGAAAGTGACGGTACTTAATGAATAAGCTCCGGCTAACTACGT<br/> GCCAGCAGCCCGGTAATACGTAGGGAGCAAGCGTTGTCCGGATTACTGGGTGTA AAGGGTGC GTAGG<br/> CGGCTTGCAAGTCAGATGTGAAATCTATGGGCTCAACCCATAGCTGCATTGAAACTGCAGAGCTTGA<br/> GTGAAGTAGAGGCAGGCGGAATCCCGGTGTAGCGGTGAAATGCGTAGAGATGGGGAGGAACACCAGT<br/> GGCGAAGGCGGCCTGCTGGGCTTAACTGACGCTGAGGCACGAAAGCGTGGGTAGCA AACAGGATTAG<br/> AAACCCTAGTAGTCC</p> |
| OTU1385 | <p>GTGGGGGATATTGCACAATGGGGAAACCCTGATGCAGCAACGCCCGGTGAGGGAAGAAGGTTTTCGG<br/> ATTGTA AACCTCTGTCCTCAGGGAAGATAATGACGGTACCTGAGGAGGAAGCTCCGGCTAACTACGTGC<br/> CAGCAGCCCGGTAATACGTAGGGAGCAAGCGTTGTCCGGAATTACTGGGTGTA AAGGGTGC GTAGGCG<br/> GGATATCAAGTCAGACGTGAAATCCATCGGCTTAACTGATGAACTGCGTTGAAACTGGTATTCTTGAGT<br/> GAGTCAGAGGCAGGCGGAATCCCGGTGTAGCGGTGAAATGCGTAGAGATCGGGAGGAACACCAGTGG<br/> CGAAGGCGGCCTGCTGGGCTTAACTGACGCTGAGGCACGAAAGCGTGGGGAGCA AACAGGATTAGAT<br/> ACCCAGTAGTCC</p>  |
| OTU490  | <p>GTGGGGGATATTGCACAATGGGGAAACCCTGATGCAGCAACGCCCGGTGAGGGAAGAAGGTTTTCGG<br/> ATTGTA AACCTCTGTCCTCAGGGAAGATAATGACGGTACCTGAGGAGGAAGCTCCGGCTAACTACGTGC<br/> CAGCAGCCCGGTAATACGTAGGGAGCAAGCGTTGTCCGGAATTACTGGGTGTA AAGGGTGC GTAGGCG</p>                                                                                                                                                                                                                                                  |



|         |                                                                                                                                                                                                                                                                                                                                                                                                                                                                                     |
|---------|-------------------------------------------------------------------------------------------------------------------------------------------------------------------------------------------------------------------------------------------------------------------------------------------------------------------------------------------------------------------------------------------------------------------------------------------------------------------------------------|
|         | <p>GCGATGCAAGTCAGGCGTGAAATCCATCGGCTTAACTGATGAACTGCGTTTGAAACTGTGTCGCTTGAGT<br/> GAGTCAGAGGCAGGCGGAATCCCGGTGTAGCGGTGAAATGCGTAGAGATCGGGAGGAACACCAGTGG<br/> CGAAGGCGGCCTGCTGGGGCTTAACTGACGCTGAGGCACGAAAGCGTGGGGAGCAAAACAGGATTAGAT<br/> ACCCAGTAGTCC</p>                                                                                                                                                                                                                                 |
| OTU1026 | <p>GTGGGGGATATTGCACAATGGGGGAAACCCTGATGCAGCAACGCCGCGTGTGGGAAGAAGGTCTTCGG<br/> ATTGTAAACCTATTGTCCTATGGGAAGATAGTACCGTACCATAGGAGGAAGCTCCGGCTAACTACGTGCC<br/> AGCAGCCGCGGTAATACGTAGGGAGCGAGCGTTGTCCGGAATTAAGGGTGTAAAGGGTGCAGTGGCGG<br/> GCCTGCAAGTCAGCCGTGAAATCCCGGGCTTAAACCCGAGGACTGCGGTTGAAACTGTGGGTCTTGAG<br/> TGAAGTAGAGGTAGGCGGAATCCCGGTGTAGCGGTGAAATGCGTAGAGATCGGGAGGAACACCAGTG<br/> GCGAAGGCGGCCTACTGGGCTTAACTGACGCTGAGGCACGAAAGTGTGGGTAGCAAAACAGGATTAGA<br/> AACCTAGTAGTCC</p>   |
| OTU590  | <p>GTGGGGGATATTGGTCAATGGGGGAAACCCTGAACCAGCAATGCCGCGTGTAGGGAAGAAGGTCTTCGG<br/> ATTGTAAACCTAAGTAGTCAGGGACGAAAGAAATGACGGTACCTGAAGAGTAAAGTCCGGCTAACTACG<br/> TGCCAGCAGCCGCGGTAATACGTAGGGAGCGAGCGTTGTCCGGAATTAAGGGTGTAAAGGGTGCAGT<br/> GCGGGATGGCAAGTCAGATGTGAAATACCGGGCTTAACTCCGGGCTGCATTGAAACTGTGCTTCTT<br/> GAGTGAAGTAGAGGCAGGCGGAATCCCTAGTGTAGCGGTGAAATGCGTAGATATTAGGAGGAACACCAG<br/> TGCGAAGGCGGCCTGCTGGGCTTAACTGACGCTGAGGCACGAAAGCATGGGGAGCAAAACAGGATTA<br/> GAAACCTAGTAGTCC</p>   |
| OTU1166 | <p>GTGAGGGATATTGGTCAATGGGGGAAACCCTGAACCAGCAACGCCGCGTGTAGGGATGACGGCCTTCGG<br/> GTTGTAAACCTCTGCTCTGTGAAGATAATGACGGTAGCAGAGGAGGAAGCTCCGGCTAACTACGTGC<br/> CAGCAGCCGCGGTAATACGTAGGGAGCAAGCGTTGTCCGGAATTAAGGGTGTAAAGGGTGCAGTGGCG<br/> GTTTCGGCAAGTCAGAAGTGAATCCATGGGCTTAAACCCATGAACTGCTTTTGAACCTGTGAACTTGAG<br/> TGAAGTAGAGGTAGGCGGAATCCCGGTGTAGCGGTGAAATGCGTAGAGATCGGGAGGAACACCAGTG<br/> GCGAAGGCGGCCTACTGGGCTTAACTGACGCTGAGGCACGAAAGCATGGGTAGCAAAACAGGATTAGA<br/> AACCTAGTAGTCC</p>    |
| OTU755  | <p>GTGGGGGATATTGCACAATGGGGGAAACCCTGATGCAGCAACGCCGCGTGTAGGGAAGAAGGTCTTCGG<br/> ATTGTAAAGCTCTGTTCTTGGTGAAGATAATGACGGTAGCCAAGGAGGAAGCTCCGGCTAACTACGTGCC<br/> AGCAGCCGCGGTAATACGTAGGGAGCAAGCGTTGTCCGGAATTAAGGGTGTAAAGGGTGCAGTGGCGG<br/> CTCTGCAAGTCAGGCGTGAAAACAGAGGCTCAACCTCTGGACTGCGTTTGAACCTGTGGGGCTTGAG<br/> TGGAGTAGAGGCAGGCGGAATCCCGGTGTAGCGGTGAAATGCGTAGAGATCGGGAGGAACACCAGTG<br/> GCGAAGGCGGCCTGCTGGGCTTAACTGACGCTGAGGCACGAAAGCATGGGTAGCAAAACAGGATTAGA<br/> AACCTGGTAGTCC</p>   |
| OTU827  | <p>GTGGGGGATATTGCACAATGGGGGAAACCCTGATGCAGCAACGCCGCGTGTAGGGAAGAAGGTCTTCGG<br/> ATTGTAAACCTCTGCTTGGTGTGACGATAATGACGGTAGCCAAGGAGGAAGCTCCGGCTAACTACGTGCC<br/> AGCAGCCGCGGTAATACGTAGGGAGCAAGCGTTGTCCGGAATTAAGGGTGTAAAGGGTGCAGTGGCGG<br/> ATTGGCAAGTCAGTAGTGAATCCATGGGCTTAAACCCATGACGTGCTATTGAAACTGTTGATCTTGAGTG<br/> AAGTAGAGGTAAGCGGAATCCCGGTGTAGCGGTGAAATGCGTAGAGATCGGGAGGAACACCAGTGGC<br/> GAAGGCGGCTTACTGGGCTTAACTGACGCTGAGGCACGAAAGCATGGGTAGCAAAACAGGATTAGAAA<br/> CCCTAGTAGTCC</p> |
| OTU1210 | <p>GTGGGGGATATTGCACAATGGGGGAAACCCTGATGCAGCAACGCCGCGTGTAGGGAAGAAGGTCTTCGG<br/> ATTGTAAACCTCTGTCCAAGGGAAGAAAAGATGACGGTACCTTTGGAGGAAGCTCCGGCTAACTACG<br/> TGCCAGCAGCCGCGGTAATACGTAGGGAGCAAGCGTTGTCCGGAATTAAGGGTGTAAAGGGTGCAGT<br/> GCGGCCGTAAAGGTCAGACGTGAAATATATGGGCTTAAACCCATAGACTGCGTTTGAACCTATATGGCTT<br/> AGTGAAGTAGAGGCAGGCGGAATCCCTGTGTAGCGGTGAAATGCGTAGAGATAGGGAGGAACACCAG</p>                                                                                                 |

|         |                                                                                                                                                                                                                                                                                                                                                                                                                                                               |
|---------|---------------------------------------------------------------------------------------------------------------------------------------------------------------------------------------------------------------------------------------------------------------------------------------------------------------------------------------------------------------------------------------------------------------------------------------------------------------|
|         | TGGCGAAGGCGCCTGCTGGGCTTAACTGACGCTGAGGCACGAAAGCGTGGGTAGCAAACAGGATTA<br>GATACCCTAGTAGTCC                                                                                                                                                                                                                                                                                                                                                                        |
| OTU480  | GTGGGGGATATTGCACAATGGGGGCAACCCTGATCCAGCGACGCCGCGTGAGGGAAGAAGGTTTCGG<br>ATTGTAAACCTCTGTTGACGGAGAAAAAATGATGGTATCCGTTTAGAAAGCCACGGCTAACTACGTGCC<br>AGCAGCCCGGTAATACGTAGGTGGCAAGCGTTGTCCGGAATTACTGGGTGTAAGGGAGTGTAGGCGG<br>GATATCAAGTCAGAAGTGAAAATTACGGGCTCAACTCGTAACCTGCTTTTGAAACTGACATTCTTGAGTG<br>AAGTAGAGGCAAGCGGAATCCTAGTGTAGCGGTGAAATGCGTAGATATTAGGAGGAACACCAGTGGCG<br>AAGGCGGCTTGCTGGGCTTTACTGACGCTGAGGCTCGAAAGCGTGGGAGCAAAACAGGATTAGAAAC<br>CCTAGTAGTCC   |
| OTU526  | GTGGGGGATATTGCACAATGGGGGAAACCCTGATGCAGCAACGCCGCGTGAGGGAAGAAGGTTTCGG<br>ATTGTAAACCACTGTTCTTGGTGAAGATAATGACGGTAACCAAGGAGAAAGCTCCGGCTAACTACGTGC<br>CAGCAGCCCGGTAATACGTAGGGAGCAAGCGTTGTCCGGATTACTGGGTGTAAGGGTGCCTAGGCGG<br>GCTAGGCAAGTCAGACGTGAAAACCATGGGCTCAACCTGTGGACTGCGTTTAAACTGTTTAGCTTGTAG<br>TGAAGTAGAGGTAGGCGGAATCCCGGTGTAGCGGTGAAATGCGTAGAGATCGGGAGGAACACCAGTG<br>GCGAAGGCGGCTACTGGGCTTAACTGACGCTGAGGCACGAAAGCATGGGTAGCAAACAGGATTAGA<br>AACCTAGTAGTCC    |
| OTU524  | GTGGGGGATATTGCACAATGGAGGAACTCTGATGCAGCAACGCCGCGTGAGGGAAGAAGGTTTCGG<br>ATTGTAAACCTTTGTCCTCAGGGAAGATAATGACGGTACCTGAGGAGGAAGCTCCGGCTAACTACGTGCC<br>AGCAGCCCGGTAATACGTAGGGAGCAAGCGTTGTCCGGATTACTGGGTGTAAGGGTGCCTAGGCGG<br>AACTGCAAGTCAGTGGTAAATCTGAGGGCTCAACCCTCAAATGAACTGCCATTGAAACTGTGGTTCTTGTAGT<br>GAAGTAGAGGTAGGCGGAATCCCGGTGTAGCGGTGAAATGCGTAGAGATCGGGAGGAACACCAGTGG<br>CGAAGGCGGCTACTGGGCTTAACTGACGCTGAGGCACGAAAGCATGGGTAGCAAACAGGATTAGATA<br>CCCTAGTAGTCC |
| OTU25   | GTGGGGAATATTGCACAATGGAGGAACTCTGATGCAGCGATGCCGCGTGAGGGAAGAAGGTTTAGGA<br>TTGTAAACCTCTGTCTTCAGGGACGAAAAAGACGGTACCTGAGGAGGAAGCTCCGGCTAACTACGTGC<br>CAGCAGCCCGGTAATACGTAGGGAGCGAGCGTTGTCCGGAATTACTGGGTGTAAGGGAGCGTAGGCGG<br>GGATCGCAAGTCAGATGTGAAAATATGGGCTTAAACCATAAACTGCATTGAAACTGTGGTTCTTGTAGT<br>GAAGTAGAGGTAAGCGGAATCCTAGTGTAGCGGTGAAATGCGTAGATATTAGGAGGAACATCAGTGGC<br>GAAGGCGGCTACTGGGCTTAACTGACGCTGAGGCTCGAAAGCGTGGGGAGCAAACAGGATTAGAAA<br>CCCTAGTAGTCC    |
| OTU282  | GTGGGGGATATTGCACAATGGAGGAACTCTGATGCAGCAACGCCGCGTGAGGGAAGAAGGATTTCGGT<br>TTGTAAACCTCTGTCAATTGGTGACGATAATGACGGTAGCCGATGAGGAAGCTCCGGCTAACTACGTGCCA<br>GCAGCCCGGTAATACGTAGGGAGCGAGCGTTGTCCGGAATTACTGGGTGTAAGGGTGCCTAGGCGGG<br>GGACCAAGTCAGGTGTGAAAATATCGGCTTAAACGGTAGCCTGCACTTGAAACTGGCCCTCTTGTAGTG<br>AAGTAGAGGCAGGCGGAATCCCGGTGTAGCGGTGAAATGCGTAGAGATCGGGAGGAACACCAGTGGC<br>GAAGGCGGCTGCTGGGCTTAACTGACGCTGAGGCACGAAAGCATGGGTAGCAAACAGGATTAGATA<br>CCCAGTAGTCC   |
| OTU1133 | GTGGGGGATATTGCACAATGGGGGAAACCCTGATGCAGCAACGCCGCGTGAGGGAAGAAGGTTTCGG<br>ATTGTAAACCTCTGTCTATGGGACGATAATGACGGTACCATAGGAGGAAGCTCCGGCTAACTACGTGCC<br>AGCAGCCCGGTAATACGTAGGGAGCGAGCGTTGTCCGGAATTACTGGGTGTAAGGGTGCCTAGGCGG<br>CTTTGCAAGTCAGGCGTGAATCTATGGGCTTAAACCATAAACTGCCTTGAAACTGTAGGGCTTGTAGTG<br>AAGTAGAGGCAGGCGGAATCCCGGTGTAGCGGTGAAATGCGTAGAGATCGGGAGGAACACCAGTGGC<br>GAAGGCGGCTGCTGGGCTTAACTGACGCTGAGGCACGAAAGCATGGGTAGCAAACAGGATTAGATA<br>CCCCAGTAGTCC     |

|         |                                                                                                                                                                                                                                                                                                                                                                                                                                                                                 |
|---------|---------------------------------------------------------------------------------------------------------------------------------------------------------------------------------------------------------------------------------------------------------------------------------------------------------------------------------------------------------------------------------------------------------------------------------------------------------------------------------|
| OTU634  | <p>GTGGGGGATATTGCACAATGGGGGAAACCCTGATGCAGCAACGCCCGTGAAGGAAGAAGGTCTTCGG<br/> ATTGTAACTTCTGTCTCAGGGAAGATAATGACGGTACCTGAGGAGGAAGCTCCGGCTAACTACGTGCC<br/> AGCAGCCCGGTAATACGTAGGGAGCGAGCGTTGTCCGGATTACTGGGTGAAAGGGTGCAGTGGCGG<br/> ATAGGCAAGTCAGTGGTGAATCTATGGGCTTAACCCATAAACTGCCATTGAAAAGTGTATCTTGAGTG<br/> GAGTAGAGGCAGGCGGAATCCCGGTGTAGCGGTGAAATGCGTAGAGATCGGGAGGAACACCAGTGGC<br/> GAAGGCGGCCTGCTGGGCTTAACTGACGCTGAGGCACGAAAGTGTGGGTAGCAAACAGGATTAGAAA<br/> CCCGAGTAGTCC</p>      |
| OTU1321 | <p>GTGGGGGATATTGCACAATGGGGGAAACCCTGATGCAGCAACGCCCGTGAAGGAAGAAGGTCTTCGG<br/> ATTGTAACTTCTGTCTCAGGGAAGATAATGACGGTACCTGAGGAGGAAGCTCCGGCTAACTACGTGCC<br/> AGCAGCCCGGTAATACGTAGGGAGCGAGCGTTGTCCGGATTACTGGGTGAAAGGGTGCAGTGGCGG<br/> ATCTGCAAGTCAGTAGTGAATCCAGGGCTTAACCTGGAAGTGTATTGAAAGTGTGGGTCTTGAGTG<br/> AGGTAGAGGCAGGCGGAATCCCGGTGTAGCGGTGAAATGCGTAGAGATCGGGAGGAACACCAGTGGC<br/> GAAGGCGGCCTGCTGGGCTTAACTGACGCTGAGGCACGAAAGCATGGGTAGCAAACAGGATTAGAAA<br/> CCCTAGTAGTCC</p>        |
| OTU626  | <p>GTGGGGGATATTGCACAATGGGGGAAACCCTGATGCAGCGATGCCCGTGGAGGAAGAAGGTTTTCCGA<br/> TTGTAACTCCTGTGTAAGGGACGAAGAAGTACCGGTACCTTACAAGAAAGCTCCGGCTAACTACGTG<br/> CCAGCAGCCCGGTAATACGTAGGGAGCGAGCGTTGTCCGGAATTACTGGGTGAAAGGGAGCGTAGGC<br/> GGGATGGTAAGTCAGATGTGAAAAGTATGGGCTCAACCCATAGACTGCATTGAAAAGTGTCTTCTGAG<br/> TGAAGTAGAGGTAAGCGGAATCCCTAGTGTAGCGGTGAAATGCGTAGATATTAGGAGGAACATCGGTGG<br/> CGAAGGCGGCTTACTGGGCTTTACTGACGCTGAGGCTCGAAAGCGTGGGGAGCAAACAGGATTAGATA<br/> CCCTAGTAGTCC</p>  |
| OTU1142 | <p>GTGGGGGATATTGCACAATGGAGGAAACTCTGATGCAGCAACGCCCGTGAAGGAAGAAGGTTTTCCGG<br/> ATTGTAACTTCTGTCTTAGGGACGATAATGACGGTACCTAAGGAGGAAGCTCCGGCTAACTACGTGCC<br/> AGCAGCCCGGTAATACGTAGGGAGCAAGCGTTGTCCGGATTACTGGGTGAAAGGGTGCAGTGGCGG<br/> ATCTGCAAGTCAGGCGTGAATCCATGGGCTTAACCCATGAACTGCGCTTGAAGTGTGGGTCTTGAGT<br/> GAAGTAGAGGTAGGCGGAATCCCGGTGTAGCGGTGAAATGCGTAGAGATCGGGAGGAACACCAGTGG<br/> CGAAGGCGGCTTACTGGGCTTTAACTGACGCTGAGGCACGAAAGTGTGGGTAGCAAACAGGATTAGAA<br/> ACCCTGTAGTCC</p>     |
| OTU1392 | <p>GTGGGGGATATTGCGCAATGGGGGAAACCCTGACGCAGCAACGCCCGTGAAGGAAGAAGGTCTTCGG<br/> ATTGTAACTTCTTTTGTGAGGACGAAGAAAGTACGGTACCTGACGAATAAGCTCCGGCTAACTACGT<br/> GCCAGCAGCCCGGTAATACGTAGGGAGCGAGCGTTGTCCGGATTACTGGGTGAAAGGGTGCAGTGG<br/> CGGCCGAGCAAGTCAGTTGTGAAAAGTATGGGCTTAACCCATAACGTGCAATTGAAAAGTGTCCGGCTT<br/> AGTGAAGTAGAGGTAGGCGGAATCCCGGTGTAGCGGTGAAATGCGTAGAGATCGGGAGGAACACCAG<br/> TGCGGAAGGCGGCTTACTGGGCTTTAACTGACGCTGAGGCACGAAAGCATGGGTAGCAAACAGGATTA<br/> GATACCCTAGTAGTCC</p> |
| OTU997  | <p>GTGGGGGATATTGCACAATGGGGGAAACCCTGATGCAGCGATGCCCGTGGAGGAAGAAGGTTTTCCGA<br/> TTGTAACTCCTGTGTAAGGGAAGGAAAGGACTGTACCTTACAAGAAAGCTCCGGCTAACTACGTGC<br/> CAGCAGCCCGGTAATACGTAGGGAGCGAGCGTTGTCCGGAATGACTGGGTGTAAGGGAGCGTAGGC<br/> GGGATGGCAAGTCAGATGTGAAAAGTATGGGCTCAACCTTCAGACTGCATTGAAAAGTGTCTTCTGA<br/> GTGAAGTAGAGGTAAGCGGAATCCCTGGTGTAGCGGTGAAATGCGTAGAGATCAGGAGGAACATCGGTG<br/> GCGAAGGCGGCTTACTGGGCTTTACTGACGCTGAGGCTCGAAAGCGTGGGGAGCAAACAGGATTAGA<br/> AACCTAGTAGTCC</p>     |
| OTU559  | <p>GTGGGGGATATTGCGCAATGGGGGAAACCCTGACGCAGCAACGCCCGTGAAGGATGAAGGTTTTCCGG<br/> ATTGTAACTTCTTTTATTAGGACGAAGAATGACGGTACTAAATGAATAAGCTCCGGCTAACTACGTGCC</p>                                                                                                                                                                                                                                                                                                                          |

|         |                                                                                                                                                                                                                                                                                                                                                                                                                                                                                    |
|---------|------------------------------------------------------------------------------------------------------------------------------------------------------------------------------------------------------------------------------------------------------------------------------------------------------------------------------------------------------------------------------------------------------------------------------------------------------------------------------------|
|         | <p>AGCAGCCGCGGTAATACGTAGGGAGCAAGCGTTATCCGGATTTACTGGGTGTAAGGGTGCGTAGGCGG<br/> CTTGTAAGTCAGATGTGAAATGTATGGGCTCAACCCATGCACTGCATTGAAACTATTGAGCTTGAGTG<br/> AAGTAGAGGTAGGCGGAATCCCTGTGTAGCGGTGAAATGCGTAGAGATAGGGAGGAACACCAGTGGC<br/> GAAGGCGGCCTACTGGGCTTTAACTGACGCTGAGGCACGAAAGCGTGGGTAGCAAACAGGATTAGATAC<br/> CCTAGTAGTCC</p>                                                                                                                                                         |
| OTU33   | <p>GTGGGGGATATTGCACAATGGGGGAAACCTGATGCAGCAACGCCGCGTGAGGGAAGACGGTTTTTCGG<br/> ATTGTAACCTCTGTTCATCGGTGACGATAATGACGGTAGCCGATGAGGAAGCTCCGGCTAACTACGTGCC<br/> AGCAGCCGCGGTAATACGTAGGGAGCGAGCGTTGTCCGGAATTACTGGGTGTAAGGGTGCGTAGGCGG<br/> GCAATCAAGTCAGGCGTGAATCTATGGGCTTAACCCATAGTCTGCGCTTGAAACTGAATGTCTTGAGTG<br/> AAGTAGAGGTAAGCGGAATCCCGGTGTAGCGGTGAAATGCGTAGAGATCGGGAGGAACACCAGTGGC<br/> GAAGGCGGCCTACTGGGCTTTTACTGACGCTGAGGCACGAAAGCATGGGTAGCAAACAGGATTAGAAAC<br/> CCTAGTAGTCC</p>  |
| OTU843  | <p>GTGGGAATATTGCACAATGGAGGAAACTCTGATGCAGCGATGCCGCGTGAGGGAAGAAGGTTTTTCGGA<br/> TTGTAACCTCTGTCTTCAGGGACGATAATGACGGTACCTGAGGAGGAAGCTCCGGCTAACTACGTGCC<br/> AGCAGCCGCGGTAATACGTAGGGAGCAAGCGTTGTCCGGAATTACTGGGTGTAAGGGAGTGTAGGCGG<br/> GATGGTAAGTTAGGTGTGAAATCTATGGGCTCAACCCATAAATTGCACTTAAAACTGCTGTTCTTGAGTG<br/> AAGTAGAGGTTAGCGGAATCCTAGTGTAGCGGTGAAATGCGTAGATATTAGGAGGAACATCAGTGGCG<br/> AAGGCGGCTAACTGGGCTTTTACTGACGCTGAGGCTCGAAAGCGTGGGAGCAAAACAGGATTAGAAAC<br/> CCCGGTAGTCC</p>  |
| OTU1191 | <p>GTGGGGGATATTGCACAATGGGGGAAACCTGATGCAGCAATGCCGCGTGAGGGAAGAAGGTTTCGG<br/> ATTGTAACCTAAGTAGTCAGGGACGAAAGAAATGACGGTACCTGAAGAGTAAGCTCCGGCTAACTACG<br/> TGCCAGCAGCCGCGGTAATACGTAGGGAGCGAGCGTTGCCCGGAATTATTGGGTGTAAGGGTGCGTAG<br/> GCGGGATGCAAGTCAGGCGTGAATGCCGAGCTTAACTGCGGAGCTGCGCTTGAAACTGGCAATCTT<br/> GAGTGAAGTAGAGGCAGGCGGAATCCTAGTGTAGCGGTGAAATGCGTAGATATTAGGAGGAACACCAG<br/> TGGCGAAGGCGGCCTGCTGGGCTTTTAACTGACGCTGAGGCACGAAAGTATGGGAGCAAAACAGGATTA<br/> GATACCCAGTAGTCC</p>    |
| OTU1198 | <p>GTGGGGGATATTGCACAATGGAGGAAACTCTGATGCAGCGACGCCGCGTGAGGGAAGACGGTTTTTCGG<br/> ATTGTAACCTCTGTCTTCAGGGACGAAATAATGACGGTACCTGAGGAGGAAGCTCCGGCTAACTACGT<br/> GCCAGCAGCCGCGGTAATACGTAGGGAGCAAGCGTTGTCCGGAATTACTGGGTGTAAGGGAGCGTAGG<br/> CGGGAATGCAAGTTGAATGTCAAATCTACCGGCTTAACTGGTAGCCGCTTCAAACCTGCGTTTCTTGAG<br/> TGAAGTAGAGGCAGGCGGAATCCTAGTGTAGCGGTGAAATGCGTAGATATTAGGAGGAACACCAGTGG<br/> CGAAGGCGGCCTGCTGGGCTTTTACTGACGCTGAGGCTCGAAAGTGTGGGTAGCAAACAGGATTAGATA<br/> CCCTAGTAGTCC</p> |
| OTU606  | <p>GTGGGGGATATTGCACAATGGGGGAAACCTGATCCAGCGATGCCGCGTGAGGGAAGAAGGTTTTTCGGA<br/> TTGTAACCTCTGTGGACAGGGACGATAATGACGGTACCTGTTTAGAAAGCCACGGCTAACTACGTGCC<br/> AGCAGCCGCGGTAATACGTAGGTGGCGAGCGTTGTCCGGAATTACTGGGTGTAAGGGAGTGTAGGCGG<br/> GAAGGCAAGTCAGAAGTGAATAATGGGCTTAACCCATAACCTGCTTTTGAACTGTTTTTCTTGAGTG<br/> AGGCAGAGGCAAGCGGAATCCTAGTGTAGCGGTGAAATGCGTAGATATTAGGAGGAACACCAGTGGCG<br/> AAGGCGGCTGCTGGGCTTTTACTGACGCTGAGGCTCGAAAGCGTGGGAGCAAAACAGGATTAGAAAC<br/> CCTAGTAGTCC</p>      |
| OTU605  | <p>GTGGGAATATTGCACAATGGGCACAAGCCTGATGCAGCGATGCCGCGTGAGGGAAGAAGGTTTTTCGGA<br/> TTGTAACCTCTGTCTTCAGGGACGATAATGACGGTACCTGAGGAGGAAGCTCCGGCTAACTACGTGCC<br/> AGCAGCCGCGGTAATACGTAGGGAGCAAGCGTTGTCCGGAATTACTGGGTGTAAGGGAGTGTAGGCGG<br/> GATGGTAAGTCAGATGTGAAATTTATGGGCTCAACCCATAACCTGCATTGAAACTGCTGTTCTTGAGTG</p>                                                                                                                                                                        |

|                         |         |                                                                                                                                                                                                                                                                                                                                                                                                                                                             |
|-------------------------|---------|-------------------------------------------------------------------------------------------------------------------------------------------------------------------------------------------------------------------------------------------------------------------------------------------------------------------------------------------------------------------------------------------------------------------------------------------------------------|
|                         |         | AAGTAGAGGTTGGCGGAATTCCTAGTGTAGCGGTGAAATGCGTAGATATTAGGAGGAACATCAGTGGCG<br>AAGGCGGCCAACTGGGCTTTTACTGACGCTGAGGCTCGAAAGCGTGGGGAGCAAACAGGATTAGAAAC<br>CCTGGTAGTCC                                                                                                                                                                                                                                                                                                |
|                         | OTU540  | GTGGGGGATATTGCACAATGGGGGAAACCCTGATGCAGCAACGCCCGTGAAGGATGAAGGTTTTTCGGA<br>TTGTAAACTTCTGTTCTTAGTGACGATAATGACGGTAGCTAAGAAGAAAGCTCCGGCTAACTACGTGCCA<br>GCAGCCGCGGTAATACGTAGGGAGCGAGCGTTGTCCGGATTACTGGGTGTAAGGGTGCAGGGCGG<br>AGAGCAAATCAGGCGTGAAGCCATGGGCTTAACCCATGAACTGCGCTTGAACTGTTTTGCTTGAGTG<br>AAGTAGAGGCAGGCGGAATTCGCCGTGACGGTGAATGCGTAGAGATCGGGAGGAACACCAGTGGC<br>GAAGGCGGCTGCTGGGCTTAACTGACGCTGAGGCACGAAAGCATGGGTAGCAAACAGGATTAGAAA<br>CCCGAGTAGTCC      |
|                         | OTU1097 | GTGAGGGATATTGGCAATGGGGGAAACCCTGACCCAGCAACGCCCGTGAAGGATGACGTTTTTCGG<br>ATTGTAAACCTCTGTCTCTGTGAAGATAGTGACGGTAGCAGAGGAGGAAGCTCCGGCTAACTACGTGC<br>CAGCAGCCGCGTAATACGTAGGGAGCAAGCGTTGTCCGGATTACTGGGTGTAAGGGTGCAGGGCG<br>GATTGGCAAGTCAGAAGTGAATCCATGGGCTTAACCCATGAACTGCTTTGAAACTGTTAGTCTTGAGT<br>GAAGTAGAGGTAGGCGGAATTCGCCGTGACGGTGAATGCGTAGAGATCGGGAGGAACACCAGTGG<br>CGAAGGCGGCTACTGGGCTTAACTGACGCTGAGGCACGAAAGTGTGGGTAGCAAACAGGATTAGAA<br>ACCCTAGTAGTCC         |
|                         | OTU286  | GTGGGAATATTGCACAATGGAGGAAACTCTGATGCAGCGATGCCCGTGAAGGAAGAAGGTTTTTCGGA<br>TTGTAAACCTCTGTGTACAGGGACGATAATGACGGTACCTGTTAGAAAGCTCCGGCTAACTACGTGCCA<br>GCAGCCGCGGTAATACGTAGGGAGCGAGCGTTGTCCGGAATTACTGGGTGTAAGGGAGTGTAGGGCG<br>ACGGCAAGTCAGATGTGAAATTTAGGGGCTCAACCCTGACCTGCATTGAAACTGCTGTTCTTGAGTG<br>AAGTAGAGGTAAGCGGAATTCCTAGTGTAGCGGTGAAATGCGTAGATATTAGGAGGAACATCAGTGGCG<br>AAGGCGGCTACTGGGCTTAACTGACGCTGAGGCTCGAAAGCGTGGGGAGCAAACAGGATTAGAAAC<br>CCTTGTAGTCC   |
|                         | OTU1374 | GTGGGGGATATTGCACAATGGAGGAAACTCTGATGCAGCGACGCCCGTGAAGGAAGACGGTCTTCGG<br>ATTGTAAACCTCTGTCTTGGGGACGATAATGACGGTACCAAGGAGGAAGCTCCGGCTAACTACGTGCC<br>AGCAGCCGCGTAATACGTAGGGAGCGAGCGTTGTCCGGAATTACTGGGTGTAAGGGAGCGTAGGGCG<br>GGTCTCAAGTCGAATGTAATCTACCGGCTCAACTGGTAGCTGCGTTGAAACTGGGGCTCTTGAGTGA<br>AGTAGAGGCAGGCGGAATTCCTAGTGTAGCGGTGAAATGCGTAGATATTAGGAGGAACACCAGTGGCGA<br>AGGCGGCTGCTGGGCTTTTACTGACGCTGAGGCTCGAAAGCGTGGGGAGCAAACAGGATTAGAAACC<br>CTAGTAGTCC     |
|                         | OTU1277 | GTGGGAATATTGCACAATGGGGGAAACCCTGATGCAGCGATGCCCGTGGAGGAAGAAGGTTTTTCGGA<br>TTGTAAACTCCTTTAACAGGGACGATAATGACGGTACCTGAAGAAAAGCTCCGGCTAACTACGTGCC<br>AGCAGCCGCGTAATACGTAGGGAGCGAGCGTTGTCCGGAATTACTGGGTGTAAGGGAGCGTAGGGCG<br>GACGGTAAGTCAGGTGTGAAATATACGTGCTCAACATGTAGACTGCACTTGAAACTGCTGTTCTTGAGTG<br>AAGTAGAGGTAAGCGGAATTCCTAGTGTAGCGGTGAAATGCGTAGATATTAGGAGGAACATCGGTGGCG<br>AAGGCGGCTACTGGGCTTTTACTGACGCTGAGGCTCGAAAGCGTGGGGAGCAAACAGGATTAGAAAC<br>CCTAGTAGTCC |
| Bifidobacteriu<br>m_unc | OTU353  | GTGGGAATATTGCACAATGGGCGCAAGCCTGATGCAGCGACGCCCGTGCGGATGACGGCCTTCGGG<br>TTGTAAACCGCTTTTATCGGGAGCAAGCCTTCGGGTGAGTGTACCTTTGCAATAAGCACCGGCTAACTA<br>CGTGCCAGCAGCCGCGTAATACGTAGGGTGCAAGCGTTATCCGGAATTATTGGGCGTAAAGGGCTCGTA<br>GGCGGTTTCGTCGCTCCGGTGTGAAAGTCCATCGCTTAAACGGTGGATCTGCGCCGGGTACGGGCGGGCT<br>GGAGTGCGGTAGGGGAGACTGGAATTCGCCGTGTAACGGTGAATGTGTAGATATCGGGAAGAACACCA<br>ATGGCGAAGGCAGGTCTCTGGGCCTTACTGACGCTGAGGAGCGAAAGCGTGGGGAGCGAACAGGATT               |

|                    |         |                                                                                                                                                                                                                                                                                                                                                                                                                                                                     |
|--------------------|---------|---------------------------------------------------------------------------------------------------------------------------------------------------------------------------------------------------------------------------------------------------------------------------------------------------------------------------------------------------------------------------------------------------------------------------------------------------------------------|
|                    |         | AGAAACCTAGTAGTCC                                                                                                                                                                                                                                                                                                                                                                                                                                                    |
| Clostridiales_ unc | OTU522  | GTGGGGAATCTTCCGCAATGGACGAAAGTCTGACGGAGCAACGCCCGTGAGTGATGAAGGATTTCCGGTCTGTAAAGCTCTGTTGTTATGACGAACGTGCAGTGTGTGAACAATGCATTGCAATGACGGTAGTAAACGAGGAAGCCACGGCTAACTACGTGCCAGCAGCCCGGTAATACGTAGGGGGCAAGCGTTATCCGGAATTA CTGGGTGTAAAGGGAGCGTAGGCGGCACGCCAAGCCAGATGTAAAGCCCGAGGCTTAACCTCGCGGA TTGCATTGGAACTGGCGAGCTAGAGTACAGGAGAGGAAAGCGGAATTCTAGTGTAGCGGTGAAATGC GTAGATATTGGGAGGAACACCAGTGGCGAAGGCGCCTTTCTGGACTGTGTCTGACGCTGAGATGCGAAA GCCAGGGTAGCGAACGGGATTAGATACCCGAGTAGTCC |
|                    | OTU482  | GTGGGGAATATTGCACAATGGGCGAAAGCCTGATGCAGCAACGCCCGTGAGTGAAGAAGTATCTCCGGT ATGTAAAGCTCTATCAGCAGGGAAGAAAATGACGGTACCTGACTAAGAAGCCCGGCTAACTACGTGCC AGCAGCCCGGTAATACGTAGGCGCAAGCGTTGTCCGGAATTATTGGGCGTAAAGGGAGCGCAGGCGG GAAACTAAGCGGATCTTAAAAGTGCGGGGCTCAACCCCGTGATGGGTCCGAACTGGTTTTCTTGTAGTG CAGGAGAGGAAAGCGGAATCCCACTGTAGCGGTGAAATGCGTAGATAITGGGAAGAACACCAGTGGC GAAGGCGGCTTTCTGGACTGTAAGTACGCTGAGGCTCGAAAGCTAGGGTAGCGAACGGGATTAGAAA CCCTAGTAGTCC                           |
|                    | OTU1343 | GTGGGGGATATTGCGCAATGGGGGAAACCCTGACGCAGCAACGCCCGTGAAAGGATGAAGTCTTCGG ATTGTAAACTCTTTTATTAAGGACGAAGAAAGTACGGTACTTAATGAATAAGTCCGGCTAACTACGT GCCAGCAGCCCGGTAATACGTAGGGGCAAGCGTTATCCGGAATTAAGGGTGTAAAGGGAGCGTAGA CCGCAAGGCAAGTCTGATGTGAAAACCCAGGGCTTAACCCCTGGGACTGCATTGGAAACTGTCTGGCTCG AGTGCCGGAGAGGTAAGCGGAATCTAGTGTAGCGGTGAAATGCGTAGATATTAGGAAGAACCAGT GGCGAAGGCGGCTTACTGGACGGTAACTGACGTTGAGGCTCGAAAGCGTGGGGAGCAAACAGGATTAG AAACCCTAGTAGTCC                            |
|                    | OTU1342 | GTGGGGAATATTGCACAATGGGGGAAACCCTGATGCAGCAGCAGCCCGTGGAGGAAGAAGTCTTCGG ATTGTAAACTCCTGTTGTTGAGGAAGATAATGACGGTACTCAACAAGGAAGTACGGCTAACTACGTGC CAGCAGCCCGGTAACCGTAGGTCACAAGCGTTGTCCGGAATAATTGGGCGTAAAGGGCGCTAGGCG GCTCGGTAAGTCTGGAGTGAAGTCTGCTTTAAAGGTGGGAATTGCTTTGGATACTGTCGGGCTTGAAGT GCAGGAGAGGTTAGTGAATCCCACTGTAGCGGTGAAATGCGTAGAGATTGGGAGGAACACCAGTGG CGAAGGCGACTAACTGGACTGTAAGTACGCTGAGGCGGAAAGTGTGGGGAGCAAACAGGATTAGAA ACCCTAGTAGTCC                               |
|                    | OTU246  | GTGGGGAATATTGCACAATGGGGGAAACCCTGATGCAGCAGCAGCCCGTGGAGGAAGAAGTCTTCGG ATTGTAAACTCCTGTTGTTGAGGAAGATAATGACGGTACTCAACAAGGAAGTACGGCTAACTACGTGC CAGCAGCCCGGTAACCGTAGGTCACAAGCGTTGTCCGGAATTAAGGGTGTAAAGGGAGCGTAGAC GGCATGGCAAGCCAGATGTGAAAGCCCGGGGCTCAACCCCGGACTGCATTGGAACTGTGAGGCTAG AGTGTCCGAGAGGAAAGCGGAATCTAGTGTAGCGGTGAAATGCGTAGATATTAGGAGGAACACCAGT GGCGAAGGCGGCTTTCTGGACGATGACTGACGTTGAGGCTCGAAAGCGTGGGGAGCAAACAGGATTAG AAACCCTAGTAGTCC                              |
|                    | OTU1391 | GTGGGGAATATTGGGCAATGGGCGAAAGCCTGACCCAGCAACGCCCGTGAGTGAAGAAGGCTTTCCGG GTTGTAAAGCTCTGTTGTTGAGGACGAAGGAAGTACGGTACTCAACAAGGAAGCCCGGCTAACTAC GTGCCAGCAGCCCGGTAATACGTAGGGGGCAGCGTTGTCCGGAATGACTGGGCGTAAAGGGCGGTGTA GGGCGCGGATTAAGTATGGAGTGAAGTCTGCTTTCAAGGTGGGAATTGCTTTGTAGACTGGTTGGCTT GAGTGCAGGAAGAGGTAAGTGAATTCCCACTGTAGCGGTGAAATGCGTAGAGATTGGGAGGAACACCA GTGGCGAAGGCGACTTACTGGGCCGTAAGTACGCTGAGGCGGAAAGCGTGGGGAGCGAACAGGATT AGAAACCTAGTAGTCC                          |
|                    | OTU973  | GTGGGGAATATTGCACAATGGGCGAAAGCCTGATGCAGCAGCAGCCCGTGAGTGAAGAAGTATTTCCGGT                                                                                                                                                                                                                                                                                                                                                                                              |

|         |                                                                                                                                                                                                                                                                                                                                                                                                                                                                                   |
|---------|-----------------------------------------------------------------------------------------------------------------------------------------------------------------------------------------------------------------------------------------------------------------------------------------------------------------------------------------------------------------------------------------------------------------------------------------------------------------------------------|
|         | <p>ATGTAAAGCTCTATCAGCAGGGAAGAAAATGACGGTACCTGACTAAGAAGCCCGGCTAACTACGTGCC<br/> AGCAGCCCGGTAATACGTAGGGAGCAAGCGTTGTCCGGATTACTGGGTGTAAGGGTGCGTAGGCGG<br/> CTAGGCAAGTCAGACGTGAAAACCATGGGCTCAACCTGTGGACTGCGTTTAAACTGTTTAGCTTGAGT<br/> GAAGTAGAGGTAGGCGGAATCCCGGTGTAGCGGTGAAATGCGTAGAGATCGGGAGGAACACCAGTGG<br/> CGAAGGCGGCTACTGGGCTTAACTGACGCTGAGGCACGAAAGCATGGGTAGCAAACAGGATTAGATA<br/> CCCTAGTAGTCC</p>                                                                                 |
| OTU236  | <p>GTGGGAATATTGCACAATGGGGAAACCCTGATGCAGCGACGCCGCGTGAGTGAAGAAGTATTTCCGGT<br/> ATGTAAAGCTCTATCAGCAGGGAAGAAAGTGACGGTACCTGAATAAGAAGCCCGGCTAACTACGTGCC<br/> AGCAGCCCGGTAATACGTAGGGGCAAGCGTTATCCGGATTACTGGGTGTAAGGGAGCGTAGACGG<br/> CAAGGCAAGTCTGAAGTAAAAGCCCGGTGCTTAAACGCCGGGACTGCTTTGAAACTGTTTGGCTGGAG<br/> TGCCGAGAGGTAAGCGGAATTCCTAGTGTAGCGGTGAAATGCGTAGATATTAGGAAGAACCAGTGG<br/> CGAAGGCGGCTACTGGACGGTAACTGACGTTGAGGCTCGAAAGCGTGGGGAGCAAACAGGATTAGAA<br/> ACCCTAGTAGTCC</p>        |
| OTU1280 | <p>GTGGGAATATTGCACAATGGGCAGAAAGCCTGATGCAGCGACGCCGCGTGAGCGAAGAAGTATTTCCGGT<br/> ATGTAAAGCTCTATCAGCAGGGAAGATAATGACGGTACCTGACTAAGAAGCACCAGGCTAAATACGTGCC<br/> AGCAGCCCGGTAATACGTATGGTGCAAGCGTTATCCGGATTACTGGGTGTAAGGGCGCGTAGGCGGG<br/> AATGCAAGTCAGATGTGAAATCCAAGGGCTCAACCCTGAACTGCATTGAAACTGTATTTCTTGAGTGT<br/> CGGAGAGGTTGACGGAATTCCTAGTGTAGCGGTGAAATGCGTAGATATTAGGAGGAACACCAGTGGCGA<br/> AGGCGGTCAACTGGACGATAACTGACGCTGAGGCGCAAAGCGTGGGGAGCAAACAGGATTAGATAACC<br/> CTAGTAGTCC</p> |
| OTU1113 | <p>GTGGGGATATTGCGCAATGGGGAAACCCTGACGCAGCAATGCCGCGTGAAAGGAAGAAGTCTTCGG<br/> ATTGTAACTTTTGTCTTTGGTGACGAAGAATGACGGTAGCCAAGGAGGAAGCTCCGGCTAACTACGTG<br/> CCAGCAGCCCGGTAATACGTAGGGAGCGAGCGTTGTCCGGATTACTGGGTGTAAGGGCGCGTAGGC<br/> GGGCTGCAAGTCAGATGTGAAATACCGGGCTTAAACCCGGGCTGCATTGAAACTGTGGGTCTTGA<br/> GTGCGGGAGAGGAAAGCGGAATTCCTAGTGTAGCGGTGAAATGCGTAGATATTAGGAGGAACACCAGTGG<br/> GCGAAGGCGGCTTCTGGACCGTAACTGACGCTGAGGCGCAAAGTGTGGGGAGCAAACAGGATTAGA<br/> AACCTTGTAGTCC</p>         |
| OTU709  | <p>GTGGGAATATTGGCAATGGGCGAAAGCCTGACCCAGCAACGCCGCGTGAGGGAGGAAGTCTTCGG<br/> ATTGTAACTCTGTCTTGGGGAAGAAGGAAGTGACGGTACCCAAGGAGGAAGCCCGGCTAACTAC<br/> GTGCCAGCAGCCCGGTAATACGTAGGGGGCAGCGTTGTCCGGAATGACTGGGCGTAAAGGGCGGTGA<br/> GGCGCCGACTAAGTCTGATGTGAAATACCCGCTTTAAGGTGGTCTGCATTGAAACTGGATGGCTA<br/> GAGTGCAGGAAGAGGTAAGTGAATTCAGTGTAGCGGTGAAATGCGTAGAGATTGGGAGGAACACCA<br/> GTGGCGAAGGCGACTTACTGGCCGCAACTGACGCTGAGGCGCAAAGCGTGGGGAGCAAACAGGATT<br/> AGAAACCCTAGTAGTCC</p>             |
| OTU421  | <p>GTGGGAATATTGCACAATGGGGAAACCCTGATGCAGCGACGCCGCGTGAGGGAAGAAGTCTTCGG<br/> ATTGTAACTCTGTGTTGAGGAAGATAATGACGGTACTCAACAAGGAAGTGACGGTAACTACGTGC<br/> CAGCAGCCCGGTAATACGTAGGGGCAAGCGTTATCCGGATTACTGGGTGTAAGGGAGCGTAGACG<br/> GCAGCGCAAGTCTGAAGTAAAAGCCCGGGCTCAACCCGGAATGGCTTTGAAACTGTGCAGCTAGA<br/> GTACCGGAGGGGTAAGCGGAATTCCTAGTGTAGCGGTGAAATGCGTAGATATTAGGAGGAACACCA<br/> GCGAAGGCGGCTTACTGGACGGTAACTGACGTTGAGGCTCGAAAGCGTGGGGAGCAAACAGGATTAGA<br/> TACCCTTGTAGTCC</p>               |
| OTU423  | <p>GTGGGGATATTGCGCAATGGGGCAACCCTGACGCAGCAACGCCGCGTGAAAGGATGAAGTCTTCGG<br/> ATTGTAACTCTTTTATTAAGGACGAAAATTGACGGTACTTAATGAATAAGCTCCGGCTAACTACGTGCC<br/> AGCAGCCCGGTAATACGTATGGTGCAAGCGTTATCCGGATTACTGGGTGTAAGGGAGCGTAGACGG</p>                                                                                                                                                                                                                                                      |

|         |                                                                                                                                                                                                                                                                                                                                                                                                                                                                                                 |
|---------|-------------------------------------------------------------------------------------------------------------------------------------------------------------------------------------------------------------------------------------------------------------------------------------------------------------------------------------------------------------------------------------------------------------------------------------------------------------------------------------------------|
|         | <p>ATGGGCAAGTCTGATGTGAAAACCCGGGGCTCAACCCGGGACTGCATTGGAACCTGTTTCATCTAGAGT<br/> GCTGGAGAGGTAAGTGAATTCTAGTGTAGCGGTGAAATGCGTAGATATTAGGAGGAACACCAGTGGC<br/> GAAGGCGGCTTACTGGACAGTAACCTGACGTTGAGGCTCGAAAGCGTGGGAGCAAACAGGATTAGAAA<br/> CCCTTGTAGTCC</p>                                                                                                                                                                                                                                               |
| OTU700  | <p>GTGGGGAATATTGCACAATGGGGGAAACCCTGATGCAGCAACGCCCGTGAAGGAAGAAGGTTCTCGG<br/> ATTGTAACTTTTGTCTTGTGGGACGATAATGACGGTACCACAGGAGGAAGCAACGGCTAACTACGTGCC<br/> AGCAGCCCGGTAATACGTAGGTTGCGAGCGTTGTCGGATTACTGGGTGTAAGGGTGCCTAGGCGG<br/> GAACGCAAGTCAGATGTGAAAGACCACGGCTCAACCGTGGTACTGCATTGAAACTGTGTTCTTGAAGT<br/> GCAGGAGAGGTAAGCGGAATCCAGTGTAGCGGTGAAATGCGTAGATATTGGGAGGAACACCAGTGGC<br/> GAAGGCGGCTTACTGGACTGTAACCTGACGCTGAAGCAGAAAGCGTGGGGATCAACAGGATTAGAAA<br/> CCCGAGTAGTCC</p>                      |
| OTU293  | <p>GTGGGGAATCTTCGCAATGGACGAAAGTCTGACGGAGCAACGCCCGTGAAGTATGAAGGATTCGGT<br/> CTGTAAAGCTCTGTTGTTATGACGAACGTGCAGTGTGTGAACAATGCATTGCAATGACGGTAGTAAACG<br/> AGGAAGCCACGGCTAACTACGTGCCAGCAGCCCGGTAATACGTAGGGGGCAAGCGTTATCCGATTTA<br/> CTGGGTGTAAGGGAGCGTAGACGGCAAGCAAGTCTGATGTGAAAACCCAGGGCTAACCTGGGAC<br/> TGCATTGGAACTGTCTGGCTCGAGTGCAGGAGGTAAGCGGAATCCTAGTGTAGCGGTGAAATGCG<br/> TAGATATTAGGAAGAACACCAGTGGCGAAGGCGGCTTACTGGACGGTAACTGACGTTGAGGCTCGAAAG<br/> CGTGGGGAGCAACAGGATTAGAAAACCTAGTAGTCC</p> |
| OTU1013 | <p>GTGGGGAATATTGGGCAATGGGCGAAAGCCTGACCCAGCAACGCCCGTGAAGGAAGAAGGTTTCGG<br/> ATTGTAACTCTGTCTCAGGACGAAGGACGTGACGGTACCTGAGGAGGAAGCCCCGGCTAACTACG<br/> TGCCAGCAGCCCGGTAATACGTAGGGGGCAGCGTTGTCCGGAATGACTGGGCGTAAAGGGCGTGTAG<br/> GCGGCTTTTAAAGTCTGGAGTGAAGCCCTTTTCAAGGAGGGGAGTGCTTTGGAGACTGGAGAGCTT<br/> GAGTGCAGGAAGAGGTAAGTGAATTCCAGTGTAGCGGTGAAATGCGTAGAGATTGGGAGGAACACCA<br/> GTGGCGAAGGCGACTTACTGGCCGTAACCTGACGCTGAGGCGCAAAAGCGTGGGGAGCGAACAGGATT<br/> AGAAAACCCGAGTAGTCC</p>                    |
| OTU1017 | <p>GTGGGGAATATTGCACAATGGGCGAAAGCCTGATGCAGCAACGCCCGTGAAGGATGAAGGCTTCGGG<br/> TCGTAAAGCTCTGTCTCAAGGAAGATAATGACGGTACTTGAGGAGGAAGCCCCGGCTAACTACGTGCC<br/> AGCAGCCCGGTAATACGTAGGGGCTAGCGTTATCCGATTACTGGCGTAAAGGGTGCCTAGGCGG<br/> TCTTTAAGTCAGGAGTGAAGGCTACGGCTCAACCGTAGTAAAGCTTTGAAACTGGAGGACTTGAAGT<br/> CAGGAGAGGAGAGTGAATTCTAGTGTAGCGGTGAAATGCGTAGATATTAGGAGGAACACCAGTAGCG<br/> AAGGCGGCTCTGACTGTAACCTGACGCTGAGGCACGAAAGCGTGGGGAGCAACAGGATTAGAAAC<br/> CCGAGTAGTCC</p>                            |
| OTU195  | <p>GTGGGGAATATTGCACAATGGGGGAAACCCTGATGCAGCGACGCCCGTGAAGGAAGAAGTATTCGGT<br/> ATGTAAAGCTCTATCAGCAGGGAAGAAGAAATGACGGTACCTGACTAAGAAGCACCAGGCTAAATACGTG<br/> CCAGCAGCCCGGTAATACGTAGGTGGCAAGCGTTGTCCGGAATTATTGGGCGTAAAGCGCGCAGGC<br/> GGCTTCCAAGTCCCTTTAAAAGTGCGGGGCTTAACCCCGTGAAGGAAGGAACTGGGAAGCTGGA<br/> GTATCGGAGAGGAAAGTGAATTCTAGTGTAGCGGTGAAATGCGTAGAGATTAGGAAGAACACCAGGTTG<br/> GCGAAGGCGACTTCTGACGAAAACCTGACGCTGAGGCGCAAAAGCGTGGGGAGCAACAGGATTAG<br/> ATACCCTAGTAGTCC</p>                     |
| OTU53   | <p>GTGGGGAATATTGCACAATGGGGGAAACCCTGATGCAGCGACGCCCGTGAAGGAAGAAGTATTCGGT<br/> ATGTAAAGCTCTATCAGCAGGGAAGAAGAAATGACGGTACCTGACTAAGAAGCACCAGGCTAAATACGTG<br/> CCAGCAGCCCGGTAATACGTATGGTGAAGCGTTATCCGATTACTGGGTGTAAGGGAGCGCAGGC<br/> GGGAAGACAAGTTGGAAGTGAATCCATGGGCTCAACCCATGAACTGCTTTCAAACTGTTTTCTTGA<br/> GTAGTGCAGAGGTAGGCGGAATCCCGGTGTAGCGGTGGAATGCGTAGATATCGGGAGGAACACCAGTG</p>                                                                                                                  |



|         |                                                                                                                                                                                                                                                                                                                                                                                                                                                              |
|---------|--------------------------------------------------------------------------------------------------------------------------------------------------------------------------------------------------------------------------------------------------------------------------------------------------------------------------------------------------------------------------------------------------------------------------------------------------------------|
|         | GCGAAGCGGCTTACTGGACGATAACTGACGCTGAGGCTCGAAAGCGTGGGGAGCAAAACAGGATTAGA<br>AACCTAGTAGTCC                                                                                                                                                                                                                                                                                                                                                                        |
| OTU1250 | GTGGGAATATTGCACAATGGGCAAAAGCCTGATGCAGCGACCCGCGTGAGCGAAGAAGTATTCGGT<br>ATGTAAAGCTCTATCAGCAGGGAAGATAATGACGGTACCTGACTAAGAAGCACCAGGCTAAATACGTGCC<br>AGCAGCCCGGTAATACGTATGGTGCAAGCGTTATCCGGATTACTGGGTGTAAAGGGAGCGCAGCGG<br>GACTGCAAGTTGGATGTGAAATACCGTGGCTTAACCACGGAACGTCATCCAAAACGTAGTTCTTGAGT<br>GAAGTAGAGGCAAGCGGAATCCGAGTGTAGCGGTGAAATGCGTAGATATTCGGAGGAACACCAGTGGC<br>GAAGGCGGCTTGTGGGCTTAACTGACGCTGAGGCTCGAAAGTGTGGGGAGCAAAACAGGATTAGAAA<br>CCCTAGTAGTCC    |
| OTU1312 | GTGGGAATATTGCACAATGGGGAAAACCTGATGCAGCGACCCGCGTGAGCGAAGAAGTATTCGGT<br>ATGTAAAGCTCTATCAGCAGGGAAGAAGAAATGACGGTACCTGACTAAGAAGCACCAGGCTAAATACGTG<br>CCAGCAGCCCGGTAATACGTAGGGGGCTAGCGTTATCCGGAATTAAGGGGTGCGTAGGT<br>GGTTTCTTAAGTCAGAGGTGAAAGCTACGGCTCAACCGTAGTAAGCCTTTGAAACTGGGAAACTTGAG<br>TGCAGGAGAGGAGTGAATCCTAGTGTAGCGGTGAAATGCGTAGATATTAGGAGGAACACCAGTTG<br>CGAAGGCGGCTCTCTGGACTGTAAGTACTGACACTGAGGCACGAAAGCGTGGGGAGCAAAACAGGATTAGAA<br>ACCCTAGTAGTCC         |
| OTU1221 | GTGGGAATATTGGCAATGGGCAAAAGCCTGACCCAGCAACCCGCGTGAGGGAAGAAGTATTCGG<br>ATTGTAAACCTCTGTCCTAAGGGACGAAGGAAGTACGGTACCTTAGGAGGAAGCCCCGGCTAACTACG<br>TGCCAGCAGCCCGGTAATACGTAGGGGGCGAGCGTTGTCCGGAATGACTGGGCGTAAAGGGCGGTAG<br>GCGGCAGTATAAGTCCGGAGTGAAGTCTGCTTTCAAGGTGGGAATTGCTTTGGAGACTGTACAGCTT<br>GAGTGCAGGAAGAGGTAAGTGAATCCCACTGTAGCGGTGAAATGCGTAGAGATTGGGAGGAACACCA<br>GTGGCAAGGCGACTTACTGGGCCGTAAGTACTGACGCTGAGGCAGCAAAAGCGTGGGGAGCAACAGGATT<br>AGAAACCCTAGTAGTCC |
| OTU1386 | GTGGGAATATTGGCAATGGGCAAAAGCCTGACCCAGCAACCCGCGTGAGGGAAGAAGGTTTCGG<br>CTCGTAAACCTCTGTCCTATGGGACGAAGGAAGTACGGTACCATAGGAGGAAGCCCCGGCTAACTACG<br>TGCCAGCAGCCCGGTAATACGTAGGGGGCGAGCGTTGTCCGGAATGATTGGGCGTAAAGGGCGGTAG<br>GCGGCCTGCTAAGTCTGGAGTGAAGTCTGCTTTCAAGGTGGGAATTGCTTTGGATACTGGTGGGCTG<br>GAGTGCAGGAGAGGAAGCGGAATTACCGGTGTAGCGGTGAAATGCGTAGAGATCGGTAGGAACACCA<br>GTGGCAAGGCGGCTTCTGGACTGAAACTGACGCTGAGGCAGCAAAAGCGTGGGGAGCAAAACAGGATT<br>AGAAACCCTAGTAGTCC   |
| OTU1384 | GTGGGAATATTGCGCAATGGGGAAAACCTGACGCAGCAACCCGCGTTAAGGAAGAAGGTTTCGG<br>GTTGTAAACTTATGTCCTGGTGGGAAGATAATGACGGTACCACCGGAGGAAGTACGGCTAACTACGTGC<br>CAGCAGCCCGGTAATACGTAGGTGGCGAGCGTTGTCCGGAATTAAGGGGTGTAAGGGCGGTAGACG<br>GGTAGATAAGTTAGATGTGAAATACCGGGGCTTAACTCCGGGCTGCATTAAAACTGTTATCTTGAGTG<br>CAGGAGAGGGAAGCGGAATCCTAGTGTAGCGGTGAAATGCGTAGATATTAGGAGGAACACCAGTGGCG<br>AAGGCGGCTTCTGGACTGTAAGTACTGACGTTGAGGCGCAAAAGCGTGGGTAGCAAAACAGGATTAGAAAC<br>CCTTGATAGTCC   |
| OTU1041 | GTGGGAATATTGCACAATGGGCAAAAGCCTGATGCAGCGACCCGCGTGAGCGAAGAAGTATTCGGT<br>ATGTAAAGCTCTATCAGCAGGGAAGATAATGACGGTACCTGACTAAGAAGCACCAGGCTAAATACGTGCC<br>AGCAGCCCGGTAATACGTATGGTGCAAGCGTTATCCGGATTACTGGGTGTAAAGGGAGCGCAGCGG<br>GATAGCAAGTCAGCTGTGAAACTATGGGCTCAACCCATAAACTGCAGTTGAAACTGTTATCTTGAGTG<br>GAGTAGAGGCAAGCGGAATCCGAGTGTAGCGGTGAAATGCGTAGATATTCGGAGGAACACCAGTGGCG<br>AAGGCGGCTTGTGGGCTTAACTGACGCTGAGGCTCGAAAGTGTGGGGAGCAAAACAGGATTAGATACC<br>CCAGTAGTCC     |

|         |                                                                                                                                                                                                                                                                                                                                                                                                                                                                       |
|---------|-----------------------------------------------------------------------------------------------------------------------------------------------------------------------------------------------------------------------------------------------------------------------------------------------------------------------------------------------------------------------------------------------------------------------------------------------------------------------|
| OTU1123 | GTGGGGAATATTGCACAATGGAGGAAACCTCTGATGCAGCGACGCCGCGTGAGTGAAAGAAGTATTTCCGGT<br>ATGTAAAGCTCTATCAGCAGGGAAGAAAATGACGGTACCTGACTAAGAAGCACCCGGCTAAATACGTGCC<br>AGCAGCCGCGGTAATACGTATGGTGCAAGCGTTATCCGGATTTACTGGGTGTAAGGGAGCGTAGGTGGC<br>AAGGCAAGCCAGAAGTGAAACCCTGGGGCTCAACCGCGGATTGCTTTTGGAACTGTCATGCTAGAGT<br>GCAGGAGGGGTGAGCGGAATTCCTAGTGTAGCGGTGAAATGCGTAGATATTAGGAGGAACACCGGAGGC<br>GAAGGCGGCTCACTGGACTGTAACCTGACACTGAGGCTCGAAAAGCGTGGGGAGCAAACAGGATTAGAAA<br>CCCTAGTAGTCC |
| OTU804  | GTGGGGAATATTGCACAATGGGGGAAACCTGATGCAGCGACGCCGCGTGAGGGAAGAAGTCTTCGG<br>ATTGTAAACTCTGTTGTTGAGGAAGATAATGACGGTACTCAACAAGGAAGTGACGGCTAACTACGTGC<br>CAGCAGCCGCGGTAATACGTAGGTGGCGAGCGTTGTCCGGAATATTGGGCCTAAGAGCATGTAGGCG<br>GCTTAATAAGTCGAGCGTGAATAATGCGGGCTCAACCCGATGGCGCTGGAAGCTGTTAGGCTTGAGT<br>GCAGGAGAGGAAAGGGGAATCCCAGTGTAGCGGTGAAATGCGTAGATATTGGGAGGAACACCACTGG<br>CGAAGGCGCCTTTCTGGACTGTGCTGACGCTGAGATGCGAAAAGCCAGGGTAGCGAACGGGATTAGATA<br>CCCTAGTAGTCC              |
| OTU1211 | GTGGGGATATTGCGCAATGGGGGCAACCTGACGCAGCAACGCCGCGTGCGGGAAGAAGTCTTCGG<br>ATTGTAAACCGTTGTCGACAGGGAAGAAGACAGTGACGGTACCCTGTGAGAAAAGCCACGGCTAACTAC<br>GTGCCAGCAGCCGCGGTAATACGTAGGTGGCAAGCGTTGTCCGATTACTGGGTGTAAGGGCGCGTA<br>GGCGGGATAGCAAGTCAGCCGTGAAATGCCGAGGCTTAACCTCGAGCTGCGGTTGAAACTGTTATTCT<br>TGAGTATCGGAGAGGAAAGCGGAATTCCTAGTGTAGCGGTGAAATGCGTAGATATTAGGAGGAACACCA<br>GTGGCGAAGGCGGCTTTCTGGACGACAACCTGACGCTGAGGCGGAAAGTGTGGGGAGCAAACAGGATT<br>AGATAACCGAGTAGTCC        |
| OTU603  | GTGGGGAATATTGCACAATGGGGGAAACCTGATGCAGCGACGCCGCGTGAGTGAAAGAAGTATTTCCGGT<br>ATGTAAAGCTCTATCAGCAGGGAAGAAAATGACGGTACCTGACTAAGAAGCCCCGGCTAACTACGTGCC<br>AGCAGCCGCGGTAATACGTAGGGGCAAGCGTTATCCGGATTTACTGGGTGTAAGGGAGCGCAGGCGG<br>GACTGCAAGTTGGATGTGAAATACCGTGGCTTAACCACGGAAGTGCATCCAAAAGTGTAGTCTTGAGT<br>GAAGTAGAGGCAAGCGGAATCCGAGTGTAGCGGTGAAATGCGTAGATATTCCGAGGAACACCACTGGC<br>GAAGGCGGCTTGCTGGGCTTTAACTGACGCTGAGGCTCGAAAAGTGTGGGGAGCAAACAGGATTAGATA<br>CCCAGTAGTCC        |
| OTU476  | GTGGGGAATATTGCACAATGGGGGAAACCTGATGCAGCGACGCCGCGTGAGTGAAAGAAGTATTTCCGGT<br>ATGTAAAGCTCTATCAGCAGGGAAGAAAATGACGGTACCTGACTAAGAAGCCCCGGCTAACTACGTGCC<br>AGCAGCCGCGGTAATACGTAGGGGCAAGCGTTATCCGGATTTACTGGGTGTAAGGGCGCGCAGGCGG<br>GCCGCAAGTTGGAAGTGAATCCGGGGCTTAACCCCGAACTGCTTTCAAAAGTGTGGTCTTGAGT<br>GATGGAGAGGCAAGCGGAATCCGTTGTAGCGGTGAAATGCGTAGATATACGGAGGAACACCACTGGC<br>GAAGGCGGCTTGCTGGACATTAACCTGACGCTGAGGCGGAAAGCGTGGGGAGCAAACAGGATTAGAAA<br>CCCTAGTAGTCC             |
| OTU1393 | GTGGGGAATATTGCGCAATGGGGGCAACCTGACGCAGCAACGCCGCGTGAAGGATGAAGTCTTCGG<br>ATTGTAAACTTTTGTCTTTGGTGAAGATAGTGACGGTAGCCAAGGAGGAAGCCACGGCTAACTACGTGC<br>CAGCAGCCGCGGTAATACGTAGGTGGCAAGCGTTGTCCGATTACTGGGTGTAAGGGCGGTAGACG<br>GGTGAGCAAGTCAGATGTGAAATACCGCAGCTTAACTGCGGGGCTGCATTTGAAACTGCTTACTTTGAGT<br>GCGGGAGAGGAAAGCGGAATTCCTAGTGTAGCGGTGAAATGCGTAGATATTAGGAGGAACACCACTGGC<br>GAAGGCGGCTTTCTGGACCGTAACCTGACGTTGAGGCGGAAAGCGTGGGTAGCAAACAGGATTAGATA<br>CCTAGTAGTCC            |
| OTU853  | GTGGGGAATATTGGGCAATGGGCGAAAGCCTGACCCAGCAACGCCGCGTGAAGGAAGAAGGCCTTCGG<br>GTTGTAAACTTTTAAAGAGGACGAAGAAGTACGGTACCTCTTGAATAAGCCACGGCTAACTACGT                                                                                                                                                                                                                                                                                                                             |

|         |                                                                                                                                                                                                                                                                                                                                                                                                                                                              |
|---------|--------------------------------------------------------------------------------------------------------------------------------------------------------------------------------------------------------------------------------------------------------------------------------------------------------------------------------------------------------------------------------------------------------------------------------------------------------------|
|         | GCCAGCAGCCGCGTAATACGTAGGTGGCGAGCGTTATCCGGATTACTGGGTGTAAAGGGTGCCTAGGT<br>GGTGAGACAAGTCTGAAGTGAAAATCCGGGGCTTAACCCCGAACTGCTTTGGAACTGCCTGACTAG<br>AGTACAGGAGAGGTAAGTGGAATTCCTAGTGTAGCGGTGAAATGCGTAGATATTAGGAGGAACACCACT<br>GGCGAAGGCGACTTACTGGACTGCTACTGACACTGAGGCACGAAAGCGTGGGGAGCAAAACAGGATTAG<br>AAACCTTGTAGTCC                                                                                                                                               |
| OTU1149 | GTGGGGGATATTGCACAATGGGGGAAACCCTGATGCAGCGACGCCGCTGGAGGAAGAAGGTTTCGG<br>ATTGTAACTCCTGTCGTTAGGGACGATAATGACGGTACCTAACAAGAAAGCACCGGCTAACTACGTGCC<br>AGCAGCCGCGGTAACACGTAGGGTGCAAGCGTTGTCGGGAATTACTGGGTGTAAAGGGAGCGCAGGCG<br>GTGCGGCAAGTCTGATGTGAAAGCCCGGGCTCAACCCCGTACTGCATTGGAACTGTCGTAAGTAGAG<br>TGTCGGAGGGTAAGCGGAATTCCTAGTGTAGCGGTGAAATGCGTAGATATTAGGAGGAACACCACTGG<br>CGAAGGCGGCTTACTGGACGATAACTGACGCTGAGGCTCGAAAGCGTGGGGAGCAAAACAGGATTAGAA<br>ACCCTAGTAGTCC |
| OTU642  | GTGGGAATATTGCACAATGGGGGAAACCCTGATGCAGCGACGCCGCTGGAGGAAGAAGGTTTCGG<br>ATTGTAACTCCTGTTGTTGAGGAAGATAATGACGGTACTCAACAAGAAAGTGACGGCTAACTACGTGC<br>CAGCAGCCGCGGTAACACGTAGGTCACAAGCGTTGTCGGGAATTACTGGGTGTAAAGGGTGCCTAGGTG<br>GTATGGCAAGTCAGAAGTGAAAACCCAGGGCTTAACTCTGGGACTGCTTTGAACTGTCAGACTGGAG<br>TGCAGGAGAGGTAAGCGGAATTCCTAGTGTAGCGGTGAAATGCGTAGATATTAGGAGGAACATCAGTGG<br>CGAAGGCGGCTTACTGGACTGAAACTGACACTGAGGCACGAAAGCGTGGGGAGCAAAACAGGATTAGAA<br>ACCCTAGTAGTCC |
| OTU646  | GTGGGGGATATTGCGCAATGGGGGAAACCCTGACGCAGCAACGCCGCTGAAGGAAGAAGGTTTCGG<br>ATTGTAACTTCTGTTCTTAGGGAAGAAGAAAGTGACGGTACCTAAGGAGCAAGCCACGGCTAACTACG<br>TGCCAGCAGCCGCGTAATACGTAGGTGGCAAGCGTTGTCGGGATTACTGGGTGTAAAGGGCGCGTAG<br>GCGGGATATCAAGTTAGTCGTGAAATACCGGGCTCAACCCCGGGCTGCGATTAAACTGATATTCTTG<br>AGTATCGGAGAGGAAAGCGGAATTCCTAGTGTAGCGGTGAAATGCGTAGATATTAGGAGGAACACCACT<br>GGCGAAGGCGGCTTCTGGACGACAACTGACGCTGAGGCGGAAAGTGTTGGGGAGCAAAACAGGATTAG<br>ATACCCTAGTAGTCC |
| OTU728  | GTGGGAATATTGCACAATGGGGGAAACCCTGATGCAGCGACGCCGCTGAAGGAAGAAGTATCTCGGT<br>ATGTAACTTCTATCAGCAGGGAAGATAGTGACGGTACCTGACTAAGAAGCCCGGCTAACTACGTGCC<br>AGCAGCCGCGGTAATACGTAGGGGCAAGCGTTATCCGGATTACTGGGTGTAAAGGGAGCGTAGGCGG<br>GATCGCAAGTCAGATGTGAAAATATGGGCTTAACCCATAAACTGCATTGAAACTGTGTTCTTGTAGTG<br>AAGTAGAGGTAAGCGGAATTCCTAGTGTAGCGGTGAAATGCGTAGATATTAGGAGGAACATCAGTGGCG<br>AAGGCGGCTTACTGGGCTTAACTGACGCTGAGGCTCGAAAGCGTGGGGAGCAAAACAGGATTAGAAAC<br>CCTGGTAGTCC    |
| OTU1208 | GTGGGAATATTGGCAATGGGCGAAAGCCTGACCCAGCAACGCCGCTGAGTGAAGAAGGCTTTCGG<br>GTTGTAAAGCTCTGTCCTTGGGGACGAAGGAAGTGACGGTACCCAAGGAGGAAGCCCGGCTAACTAC<br>GTGCCAGCAGCCGCGTAATACGTAGGGGCGAGCGTTGTCGGGAATGACTGGGCGTAAAGGGCGTGTA<br>GGCGGCCGATTAAGTGTGGAGTGAAAGTCTGCTTTAAAGGTGGGAATTGCTTTGACAGACTGGTTGGCT<br>TGAGTGCGGAAGAGGTAAGTGAATTCACAGTGTAGCGGTGAAATGCGTAGAGATTGGGAGGAACACC<br>AGTGGCGAAGGCGACTTACTGGGCGTAACTGACGCTGAGGCGGAAAGCGTGGGGAGCGAACAGGAT<br>TAGAAACCCTAGTAGTCC  |
| OTU1201 | GTGGGAATATTGGCAATGGAGGCAACTCTGACCCAGCAACGCCGCTGAATGAAGAAGGCTTTCGG<br>ATTGTAAAGTCTTACGAGGGGACGAAAAGAATGACGGTACCTCGAGAATAAGCCACGACTAACTACG<br>TGCCAGCAGTCGCGGTAATACGTAGGTGGCGAGCGTTGTCGGGAATGACTGGGCGTAAAGGGAGCGTAG<br>GCGGCACAACAAGTTAGGAGTGAAATACCGTGGCTTAACCCAGGAACTGCTTTAAACTGTTGAGCTA                                                                                                                                                                     |

|         |                                                                                                                                                                                                                                                                                                                                                                                                                                                         |
|---------|---------------------------------------------------------------------------------------------------------------------------------------------------------------------------------------------------------------------------------------------------------------------------------------------------------------------------------------------------------------------------------------------------------------------------------------------------------|
|         | GAGTGATGGAGAGGAAAGCGGAATTCCTAGTGTAGCGGTGGAATGCGTAGATATTAGGAGGAACACCAG<br>AGGCCAAGGCGGCTTTCTGGACATTAAGTACGCTGAGGCTCGAAAGCGTGGGGAGCAAACAGGATTA<br>GAAACCCGGTAGTCC                                                                                                                                                                                                                                                                                         |
| OTU344  | GTGGGAATATTGCACAATGGGGAAACCCTGATGCAGCGACGCCGCTGGAGGAAGAAGGTCTTCGG<br>ATTGTAAGCTCTGTGTTGAGGAAGATAATGACGGTACTCAACAAGGAAGTGACGGCTAACTACGTGC<br>CAGCAGCCCGGTAAAACGTAGGTCACAAGCGTTGTCCGGAATTACTGGGTGTAAGGGAGCGTAGAC<br>GGATGGACAAGTCTGATGTGAAAGGCTGGGGCTAACCCCGGACTGCATTGGAACTGCCCGTCTTGA<br>GTGCCGGAGAGGTAAGCGGAATTCCTAGTGTAGCGGTGAAATGCGTAGATATTAGGAGGAACACCAGTG<br>GCGAAGGCGGCTTACTGGACGGTAACTGACGTTGAGGCTCGAAAGCGTGGGGAGCAAACAGGATTAGA<br>TACCCTAGTAGTCC |
| OTU346  | GTGGGAATATTGCACAATGGGGAAACCCTGATGCAGCGACGCCGCTGAGCGAAGAAGTATTTCGGT<br>ATGTAAAGCTCTATCAGCAGGGAAGAAGAAATGACGGTACCTGACTAAGAAGCACCAGGCTAAATACGTG<br>CCAGCAGCCCGGTAATACGTATGGTCAAGCGTTATCCGATTACTGGGTGTAAGGGCGCGCAGGC<br>GGGCCGGCAAGTTGGAAGTGAATCTATGGGCTAACCCATAAACTGCTTCAAAAAGTCTGGTCTTGA<br>GTGATGGAGAGGCAGGCGGAATTCCTGTGTAGCGGTGAAATGCGTAGATATACGGAGGAACACCAGTG<br>GCGAAGGCGGCTTCTGGACATTAAGTACGCTGAGGCGGAAAGCGTGGGGAGCAAACAGGATTAGA<br>AACCCCTAGTAGTCC  |
| OTU1281 | GTGGGAATATTGCACAATGGGC GAAAGCCTGATGCAGCGACGCCGCTGAGCGAAGAAGTATTTCGGT<br>ATGTAAAGCTCTATCAGCAGGGAAGATAATGACGGTACCTGACTAAGAAGCACCAGGCTAAATACGTGCC<br>AGCAGCCCGGTAATACGTATGGTCAAGCGTTATCCGATTACTGGGCGTAAAGGGTGCAGGCGGT<br>CTTTAAGTCAGGAGTGAAGGCTACGGCTCAACCGTAGTAAGCTCTGAAACTGGAGGACTTGAGTGC<br>AGGAGAGGAGAGTGAATTCCTAGTGTAGCGGTGAAATGCGTAGATATTAGGAGGAACACCAGTAGCGA<br>AGGCGGCTCTCTGGACTGTAAGTACGCTGAGGCACGAAAGCGTGGGGAGCAAACAGGATTAGAAACC<br>CTAGTAGTCC   |
| OTU291  | GTGGGAATATTGGCAATGGGCGAAGCCTGACCCAGCAACGCCGCTGAAGGAAGAAGGCTTTCGG<br>GTTGTAAGCTCTTTTGTGGGGACGAAACAATGACGGTACCCGACGAATAAGCCACGGCTAACTACG<br>TGCCAGCAGCCCGGTAATACGTAGGTGGCAAGCGTTATCCGATTACTGGGTGTAAGGGAGCGTAG<br>ACGGTGTGGCAAGTCTGATGTGAAAGGCATGGGCTCAACCTGTGGACTGCATTGGAACTGTCATACTT<br>GAGTGCCGGAGGGTAAGCGGAATTCCTAGTGTAGCGGTGAAATGCGTAGATATTAGGAGGAACACCAG<br>TGCCGAAGGCGGCTTACTGGACGGTAACTGACGTTGAGGCTCGAAAGCGTGGGGAGCAAACAGGATTA<br>GATACCCTAGTAGTCC |
| OTU845  | GTGGGAATATTGCACAATGGGGAAACCCTGATGCAGCGACGCCGCTGAGTGAAGAAGTATTTCGGT<br>ATGTAAAGCTCTATCAGCAGGGAAGAAAATGACGGTACCTGACTAAGAAGCCCGGCTAACTACGTGCC<br>AGCAGCCCGGTAATACGTAGGCGCAAGCGTTGTCCGGAATTATTGGGCGTAAAGGGAGCGCAGGCGG<br>GAAACTAAGCGGATCTTAAAAGTGCGGGCTCAACCCGCTGATGGGGTCCGAACTGGTTTTCTTGTAGTG<br>CAGGAGAGGAAGCGGAATTCAGTGTAGCGGTGAAATGCGTAGATATTGGGAAGAACCAGTGGC<br>GAAGGCGGCTTTCTGGACTGTAAGTACGCTGAGGCTCGAAAGCTAGGGTAGCGAACGGGATTAGATAC<br>CCTAGTAGTCC    |
| OTU1092 | GTGGGAATATTGCACAATGGGGAAACCCTGATGCAGCGACGCCGCTGGAGGAAGAAGGTCTTCGG<br>ATTGTAAGCTCTGTGTTGAGGAAGATAATGACGGTACTCAACAAGGAAGTGACGGCTAACTACGTGC<br>CAGCAGCCCGGTAAAACGTAGGTCACAAGCGTTGTCCGGAATTACTGGGTGTAAGGGAGCGTAGAC<br>GGCGCAGCAAGTCTGATGTGAAAGGCAGGGGCTTAACCCCTGGACTGCATTGGAACTGCTGTGCTTGA<br>GTGCCGAGGGGTAAGCGGAATTCCTAGTGTAGCGGTGAAATGCGTAGATATTAGGAGGAACACCAGTG<br>GCGAAGGCGGCTTACTGGACGGTAACTGACGTTGAGGCTCGAAAGCGTGGGGAGCAAACAGGATTAGA                  |

|         |                                                                                                                                                                                                                                                                                                                                                                                                                                                               |
|---------|---------------------------------------------------------------------------------------------------------------------------------------------------------------------------------------------------------------------------------------------------------------------------------------------------------------------------------------------------------------------------------------------------------------------------------------------------------------|
|         | AACCCTAGTAGTCC                                                                                                                                                                                                                                                                                                                                                                                                                                                |
| OTU302  | GTGGGGATATTGCGCAATGGGGGAAACCCTGACGCAGCAACGCCGCGTGAAGGATGAAGGTCTTCGG<br>ATTGTAACTTCTTTATTAAGGACGAAGAAAGTGACGGTACTTAATGAATAAGCTCCGGCTAACTACGT<br>GCCAGCAGCCGCGGTAATACGTAGGGGGCAAGCGTTATCCGGATTTACTGGGTGTAAGGGAGCGTAGA<br>CGGACTGGCAAGTCTGATGTGAAAGGCGGGGCTCAACCCCTGGACTGCATTGGAACTGTTAGTCTTG<br>AGTGCCGGAGAGGTAAGCGGAATTCCTAGTGTAGCGGTGAAATGCGTAGATATTAGGAGGAACACCAGT<br>GGCGAAGGCGGTTACTGGACGGTAAGTACGTTGAGGCTCGAAAGCGTGGGGAGCAAAACAGGATTAG<br>ATACCCTAGTAGTCC |
| OTU1028 | GTGGGAATATTGCACAATGGGGGAAACCCTGATGCAGCAACGCCGCGTGAAGGAAGACGGTTTTTCGG<br>ATTGTAACTTCTGTCTTAGTGAAGAATAATGACGGTAGCTAAGGAGCAAGCCACGGCTAACTACGTGC<br>CAGCAGCCGCGGTAATACGTAGGTGGCAAGCGTTGTCCGGAATTAAGGGTGTAAAGGGAGCGCAGGGC<br>GTGCGCAAGTCTGATGTGAAAGCCCGGGCTCAACCCCGTACTGCATTGGAACTGTCGTAAGTAGAG<br>TGTCGGAGGGTAAGCGGAATTCCTAGTGTAGCGGTGAAATGCGTAGATAATTAGGAGGAACACCAGTGG<br>CGAAGGCGGCTTACTGGACGATAACTGACGCTGAGGCTCGAAAGCGTGGGGAGCAAAACAGGATTAGAA<br>ACCCGAGTAGTCC |
| OTU167  | GTGGGAATATTGCACAATGGGGGAAACCCTGATGCAGCAGCGCCGCTGGAGGAAGAAGGTCTTCGG<br>ATTGTAACTCTGTGTTGAGGAAGATAATGACGGTACTCAACAAGGAAGTGACGGCTAACTACGTGC<br>CAGCAGCCGCGTAAACGTAGGTACAAGCGTTGTCCGGAATTAAGGGTGTAAAGGGAGCGTAGAC<br>GGCAAGGCAAGTCTGATGTGAAAACCCAGGGCTTAACCCCTGGACTGCATTGGAACTGTCGCTCGA<br>GTGCCGGAGAGGTAAGCGGAATTCCTAGTGTAGCGGTGAAATGCGTAGATAATTAGGAAGAACACCAGTG<br>GCGAAGGCGGCTTACTGGACGGTAAGTACGTTGAGGCTCGAAAGCGTGGGGAGCAAAACAGGATTAGA<br>TACCCTAGTAGTCC        |
| OTU719  | GTGGGAATATTGGCAATGGAGGGAAGTCTGACCCAGCAACGCCGCGTGAGTGAAGAAGGTCTTCGG<br>ATTGTAAAACCTTTAAGCGGGGACGAAGAAAGTGACTGTACCCGAGATAAGCATCGGCTAACTACG<br>TGCCAGCAGCCGCGTAATACGTAGGATGCAAGCGTTATCCGGAATGACTGGGCGTAAAGGGTGCCTAG<br>GTGGTTGTCAAGTTGGCAGCGTAATCCGTGGCTTAACCCGGAAGTACTGCCAAAAGTATGATAGCTTG<br>AGTGCGGAGGGGTATGTGGAATTCCTAGTGTAGCGGTGAAATGCGTAGATAATTAGGAGGAACACCAGT<br>GGCGAAAGCGACATACTGGCCGTAAGTACACTGAAGCACGAAAGCGTGGGGAGCAAAACAGGATTAG<br>AAACCCTAGTAGTCC   |
| OTU1213 | GTGGGAATATTGGCAATGGGCGAAAGCCTGACCCAGCAACGCCGCGTGAGGGAAGAAGGTCTTCGG<br>ATTGTAAACCTCTGTCTCAGGACGAAGGAAGTGACGGTACTGAGGAGGAAGCCCGGCTAACTACG<br>TGCCAGCAGCCGCGTAATACGTAGGGGGCAAGCGTTGTCCGGAATGACTGGGCGTAAAGGGCGTGTAG<br>GCGGCTGATAAGTATGAAGTGAAGTCTGCTTCAAGGTGGGAATGCTTTGTAGACTGTCGGGCTTG<br>AGTGCGGAAGAGGTAAGTGAATTCAGTGTAGCGGTGAAATGCGTAGATAATTGGGAGGAACACCAG<br>TGGCGAAGGCGACTTACTGGCCGTAAGTACGCTGAGGCGGAAAGCGTGGGGAGCGAACAGGATTA<br>GATACCCTGGTAGTCC           |
| OTU407  | GTGGGAATATTGCACAATGGGGGAAACCCTGATGCAGCAACGCCGCGTGAGTGAAGAAGTATTTCCGT<br>ATGTAAAGCTCTATCAGCAGGGAAGATAATGACGGTACTGACTAAGAAGCTCCGGCTAAATACGTGCCA<br>GCAGCCGCGGTAATACGTATGGAGCAAGCGTTATCCGGATTTACTGGGTGTAAGGGTGCCTAGGTGGCA<br>GTGCAAGTCAGATGTGAAAGGCGGGGCTCAACCCCGAGCTGCATTGAAACTGCTCGGCTAGAGTAC<br>AGGAGAGGCAGGCGGAATTCCTAGTGTAGCGGTGAAATGCGTAGATAATCGGGAGGAACACCAGTGGCG<br>AAGGCGGCTACTGGGACCAACTGACGCTGAGGCTCGAAAGTGTGGGTAGCAAAACAGGATTAGAAAC<br>CCTAGTAGTCC   |
| OTU1279 | GTGGGAATATTGCACAATGGGGGAAACCCTGATGCAGCAGCGCCGCTGGAGGAAGAAGGTCTTCGG                                                                                                                                                                                                                                                                                                                                                                                            |

|         |                                                                                                                                                                                                                                                                                                                                                                                                                                                                                     |
|---------|-------------------------------------------------------------------------------------------------------------------------------------------------------------------------------------------------------------------------------------------------------------------------------------------------------------------------------------------------------------------------------------------------------------------------------------------------------------------------------------|
|         | <p>ATTGTA AACCTCTGTGTGTTGAGGAAGATAATGACGGTACTCAACAAGGAAGTGACGGCTAACTACGTGC<br/> CAGCAGCCCGGTA AACCTAGGTACAAGCGTTGTCCGGAATTACTGGGTGTA AAGGGTGCGTAGGTG<br/> GTGAGACAAGTCTGAAGTGA AAAATCCGGGCTTAACCCCGAACTGCTTTGGA AACTGCCTGACTAGA<br/> GTACAGGAGAGGTAAGTGAATTCCTAGTGTAGCGGTGAAATGCGTAGATATTAGGAGGAACACCAAGT<br/> GCGAAGGCGACTTACTGGACTGCTACTGACACTGAGGCACGAAAGCGTGGGGAGCAAACAGGATTAGA<br/> TACCCTAGTAGTCC</p>                                                                         |
| OTU1048 | <p>GTGGGGAATATTGCACAATGGGGGAAACCCTGATGCAGCGATGCCCGTGAAGGAAGAAGATTTTCGGA<br/> TTGTAAACTTCTATCAGCAAGGAAGAAAACGGACAGTACTTGACTAAGAAGCCCCGGCTAACTACGTGC<br/> CAGCAGCCCGGTAATACGTAGGGGGCAAGCGTTATCCGGAATTACTGGGTGTA AAGGGTGCGTAGGCG<br/> GTATGGCAAAGTTGATGTGAAACCCACAGGCTAACCTGTGGCTTGCATCGAAACTACTGAACTAGAGT<br/> GCAGGAGAGGAAAGCGGAATTCCTAGTGTAGCGGTGAAATGCGTAGATATTAGGAAGAACACCAAGTGGC<br/> GAAGGCGGCTTTCTGGACTGCAACTGACGCTGAGGCACGAAAGCGTGGGGAGCAAACAGGATTAGAAA<br/> CCCGTGTAGTCC</p> |
| OTU620  | <p>GTGGGGAATATTGGGCAATGGGCGAAAGCCTGACCCAGCAACGCCCGTGAAGGAGGAAGGTTTCGG<br/> ATTGTAACCTCTGTCTTAGGGAAGAAGGAAGTGACGGTACCTAAGGAGGAAGCCCCGGCTAACTACG<br/> TGCCAGCAGCCCGGTAATACGTAGGGGGCAGCGTTGTCCGGAATGACTGGGCGTAAAGGGCGTGTAG<br/> GCGGCCGACTAAGTCTGATGTGAAATACCCGCTTTAAGGTGGTCTGCATTGAAAACCTGGATGGCTAG<br/> AGTGCGGAAGAGGTAAGTGAATTCACAGTGTAGCGGTGAAATGCGTAGAGATTGGGAGGAACACCAG<br/> TGCGGAAGGCGACTTACTGGCCGCAACTGACGCTGAGGCGGAAAGCGTGGGGAGCAAACAGGATTA<br/> GAAACCTTGTAGTCC</p>         |
| OTU697  | <p>GTGGGGAATATTGGGCAATGGAGGAACTCTGACCCAGCAACGCCCGTGAATGATGAAGTCTTCGGA<br/> TTGTAAAGTTCTGTGACGGGGACGAAGAAAAGTGACGGTACCCCGAAAGCAAGCTACGGCTAACTACG<br/> TGCCAGCAGCCCGGTAATACGTAGGTAGCAAGCGTTGTCCGGAATGACTGGGCGTAAAGGGTGCGTAG<br/> GTGGCTAGGCAAGTTGGTAGTGAAATTCGGGGCTTA ACTCCGGCGTACTACCAAGACTGTTTAGCTTG<br/> AGTACAGGAGAGGTAAGTGAATTCCTAGTGTAGCGGTGGAATGCGTAGATATTAGGAGGAACACCGGT<br/> GGCGAAAGCGACTTACTGGCTGCAACTGACACTGAGGCACGAAAGCGTGGGGAGCAAACAGGATTAG<br/> ATACCCTAGTAGTCC</p>    |
| OTU592  | <p>GTGGGGAATATTGCGCAATGGGGCAACCCTGACGCAGCAACGCCCGTGAAGGATGACGGTCTTCGG<br/> ATTGTAACCTCTTTAAGTGTGGAAGAAAATGACGGTACACACAGAATAAGCCACGGCTAACTACGTGCC<br/> AGCAGCCCGGTAATACGTAGGTGGCAGCGTTGTCCGATTACTGGGTGTA AAGGGCGTGTAGGCGG<br/> GATTACAAGTCAAGTGTGAAATACCGGGCTTA ACTCCGGGCTGCATTGAAAACCTGATGTTCTGAGTG<br/> CCGGAGAGGAAAGCGGAATTCCTAGTGTAGCGGTGAAATGCGTAGATATTAGGAGGAACACCAAGTGGC<br/> AAGGGCGCTTTCTGGACGGTAACTGACGCTGAGGCGGAAAGCGTGGGGAGCAAACAGGATTAGATA<br/> CCAGTAGTCC</p>          |
| OTU597  | <p>GTGGGGAATATTGCACAATGGGGGAAACCCTGATGCAGCGACGCCCGTGAAGTGAAGAAGTATTTCGTA<br/> ACGTAAAGCTCTATCAGCAGGGAAGAAAATGACGGTACCTGACTAAGAAGCCCCGGCTAACTACGTGCC<br/> AGCAGCCCGGTAATACGTAGGGGCAAGCGTTATCCGATTACTGGGTGTA AAGGGAGCGTAGACGG<br/> CACAGCAAGTCTGATGTGAAAGCCGGGGCCCAACCCCGAACTGCATTGAAAACCTGCTGGCTTGTAG<br/> TGCAGGAGAGGTAAGCGGAATTCCTAGTGTAGCGGTGAAATGCGTAGATATTAGGAGGAACACCAAGTGG<br/> CGAAGGCGGCTTACTGGACTGTA ACTGACGTTGAGGCTCGAAAGCGTGGGGAGCAAACAGGATTAGAA<br/> ACCCTAGTAGTCC</p>  |
| OTU1316 | <p>GTGGGGAATATTGCACAATGGGGGAAACCCTGATGCAGCAACGCCCGTGAAGTGAAGAAGTATTTCGTA<br/> TTGTAAAGCTCTGTCTCAGGACGATAATGACGGTACCTGAGGAGGAAGCCACGGCTAACTACGTGCC<br/> AGCAGCCCGGTAATACGTAGGTGGCAGCGTTGTCCGATTACTGGGTGTA AAGGGAGCGAGGCGG</p>                                                                                                                                                                                                                                                        |

|                         |         |                                                                                                                                                                                                                                                                                                                                                                                                                                                                                |
|-------------------------|---------|--------------------------------------------------------------------------------------------------------------------------------------------------------------------------------------------------------------------------------------------------------------------------------------------------------------------------------------------------------------------------------------------------------------------------------------------------------------------------------|
|                         |         | AAGGCTAAGTCTGATGTGAAAGCCGGGGCTCAACCCCGTACTGCATTGGAACTGGTCATCTAGAGT<br>GTCGGAGGGGTAAGTGAATTCTAGTGTAGCGGTGAAATGCGTAGATATTAGGAGGAACACCAGTGGC<br>GAAGGCGGCTTACTGGACGATAACTGACGCTGAGGCTCGAAAGCGTGGGGAGCAAACAGGATTAGATA<br>CCCGTGTAGTCC                                                                                                                                                                                                                                              |
|                         | OTU836  | GTGGGAATATTGCACAATGGGGGAACCCTGATGCAGCAACGCCGCTGAAGGATGAAGGCCTTCGG<br>GTTGTAACCTTTTTGATCGGGGACGAAAGAATGACTGTACCCGAAAAACAAGTCACGGCTAACTACG<br>TGCCAGCAGCCGGTAATACGTAGGTGGCAAGCGTTGTCCGATTACTGGGTGTAAGGGCGTGTAG<br>GCGGGTCAGCAAGTCAGATGTGAAATGCCGGGCTTAACCTCGGAAGTCAACTGAACTGTTGATCTT<br>GAGTACTGGAGAGAAAGTGAATTCTAGTGTAGCGGTGAAATGCATAGAGATTAGGAGGAACACCAG<br>TGGCAAGGCGGCTTCTGGACAGTAACGTGACGCTGAGGCGGAAAGCGTGGGGAGCAACAGGATTA<br>GATACCCTGTAGTCC                               |
| Parabacteroid<br>es_unc | OTU920  | GTGAGGAATATTGGTCAATGGCGGAGAGCCTGAACCAGCCAAGTCGCGTGAAGGATGAAGGATCTATGG<br>TTTGTAACCTCTTTTATATGGGAATAAAGTGAGGAACGTGTTCTTTTTGTATGTACCATATGAATAAGCA<br>TCGGCTAACTCCGTGCCAGCAGCCGCGTAATACGGAGGATGCGAGCGTTATCCGGATTATTGGGTTA<br>AAGGGTGCCTAGGTGGCTTATTAAGTCAGCGGTGAAAGTTGTGGCTTAACCATAAAATTGCCGTTGAAA<br>CTGGTTAGCTTGAGTATATTGAGGTAGGCGGAATGCGTGGTGTAGCGGTGAAATGCATAGATATCACGC<br>AGAACTCCGATTGCGAAGGCAGCTTACTAACTATAACTGACACTGAAGCACGAAAGCGTGGGGATCAA<br>ACAGGATTAGAAACCCTAGTAGTCC  |
|                         | OTU998  | GTGAGGAATATTGGTCAATGGCGGAGAGCCTGAACCAGCCAAGTCGCGTGAAGGATGAAGGATCTATGG<br>TTTGTAACCTCTTTTATATGGGAATAAAGTGAGGAACGTGTTCTTTTTGTATGTACCATATGAATAAGCA<br>TCGGCTAACTCCGTGCCAGCAGCCGCGTAATACGGAGGATGCGAGCGTTATCCGGATTATTGGGTTA<br>AAGGGTGCCTAGGTGGTAAATTAAGTCAGCGGTGAAAGTTGTGGCTCAACCATAAAATTGCCGTTGAA<br>ACTGGTTGACTTGAGTATATTGAGGTAGGCGGAATGCGTGGTGTAGCGGTGAAATGCATAGATATCACG<br>CAGAACTCCGATTGCGAAGGCAGCTTACTAACTATAACTGACACTGAAGCACGAAAGCGTGGGGATCA<br>AACAGGATTAGAAACCCTAGTAGTCC  |
|                         | OTU819  | GTGAGGAATATTGGTCAATGGCCGAGAGGCTGAACCAGCCAAGTCGCGTGAAGGAAGAAGGATCTATG<br>GTTTGTAACCTCTTTTATAGGGGAATAAAGTGAGGACGTGTCCTTTTTGTATGTACCATATGAATAAG<br>CATCGGCTAACTCCGTGCCAGCAGCCGCGTAATACGGAGGATGCGAGCGTTATCCGGATTATTGGGTT<br>TAAAGGGTGCCTAGGTGGTATTAAGTCAGCGGTGAAAGTTGTGGCTCAACCATAAAATTGCCGTTG<br>AACTGGGTTACTTGAGTGTGTTGAGGTAGGCGGAATGCGTGGTGTAGCGGTGAAATGCATAGATATCA<br>CGCAGAACTCCGATTGCGAAGGCAGCTTACTAAACCATAACTGACACTGAAGCACGAAAGCGTGGGGAT<br>CAAACAGGATTAGAAACCCTAGTAGTCC    |
|                         | OTU1286 | GTGAGGAATATTGGTCAATGGACGAGAGTCTGAACCAGCCAAGTAGCGTGAAGGATGACTGCCCTATGG<br>GTTTGTAACCTCTTTTATACGGGAATAAAGTGAGGCACGTGTCCTTTTTGTATGTACCATATGAATAAGC<br>ATCGGCTAACTCCGTGCCAGCAGCCGCGTAATACGGAGGATGCGAGCGTTATCCGGATTATTGGGTTT<br>AAAGGGTGCCTAGGTGGTATTAAGTCAGCGGTGAAAGTTGTGGCTCAACCATAAAATTGCCGTTGA<br>AACTGGGTTACTTGAGTGTGTTGAGGTAGGCGGAATGCGTGGTGTAGCGGTGAAATGCATAGATATCAC<br>GCAGAACTCCGATTGCGAAGGCAGCTTACTAAACCATAACTGACACTGAAGCACGAAAGCGTGGGGATC<br>AAACAGGATTAGATACCCTAGTAGTCC |
|                         | OTU1328 | GTGAGGAATATTGGTCAATGGACGAGAGTCTGAACCAGCCAAGTAGCGTGCAGGATGACGGCCCTATGG<br>GTTTGTAACCTGCTTTTATAAGGAATAAAGTGAGTCTCGTGAGACTTTTTGCATGTACCTTATGAATAAGG<br>ACCGGCTAATCCGTGCCAGCAGCCGCGTAATACGGAAAGTCCGGCGTTATCCGGATTATTGGGTTT<br>AAAGGGTGCCTAGGTGGTATTAAGTCAGCGGTGAAAGTTGTGGCTCAACCATAAAATTGCCGTTGA<br>AACTGGGTTACTTGAGTGTGTTGAGGTAGGCGGAATGCGTGGTGTAGCGGTGAAATGCATAGATATCAC<br>AACTGGGTTACTTGAGTGTGTTGAGGTAGGCGGAATGCGTGGTGTAGCGGTGAAATGCATAGATATCAC                                 |

|                       |         |                                                                                                                                                                                                                                                                                                                                                                                                                                                                                           |
|-----------------------|---------|-------------------------------------------------------------------------------------------------------------------------------------------------------------------------------------------------------------------------------------------------------------------------------------------------------------------------------------------------------------------------------------------------------------------------------------------------------------------------------------------|
|                       |         | GCAGAACTCCGATTGCGAAGGCAGCTTACTAAACCATAACTGACACTGAAGCACGAAAGCGTGGGGATC<br>AAACAGGATTAGATACCCAGTAGTCC                                                                                                                                                                                                                                                                                                                                                                                       |
|                       | OTU1129 | GTGAGGAATATTGGTCAATGGACGTGAGTCTGAACCAGCCAAGTCGCGTGAAGGAAGAAGGTTCTATGG<br>ATTGTAAACTTCTTTTATACGGGAATAAAGTGCATCACGTGTGATGTTTTGTATGTACCGTATGAATAAGCA<br>TCGGCTAACTCCGTGCCAGCAGCCGCGGTAATACGGAGGATGCGAGCGTTATCCGGATTTATTGGGTTTA<br>AAGGGTGCGTAGGTTGTTTTAAGTCAGCGGTGAAAGTTTGTGGCTCAACCATAAAATTGCCGTGAAA<br>CTGGAAGACTTGAGTGTGTTTGGGTAGGCGGAATGCGTGGTGTAGCGGTGAAATGCATAGATATCACG<br>CAGAACTCCGATTGCGAAGGCAGCTTACTAAACCATAACTGACACTGAAGCACGAAAGCGTGGGGATCA<br>AAACAGGATTAGAAACCCAGTAGTCC         |
|                       | OTU665  | GTGAGGAATATTGGTCAATGGCCGAGAGGCTGAACCAGCCAAGTCGCGTGAAGGATGAAGGATCTATGG<br>TTTGTAAACTTCTTTTATACGGGAATAAAGTGGGTCACGTGTGGCTTTTGTATGTACCGTATGAATAAGC<br>ATCGGCTAACTCCGTGCCAGCAGCCGCGGTAATACGGAGGATGCGAGCGTTATCCGGATTTATTGGGTTT<br>AAAGGGTGCGTAGGTGGTCTTTAAGTCAGCGGTGAAAGTTTGTGGCTCAACCATAAAATTGCCATTGA<br>AACTGGGAGACTTGAGTATGTTTGGGTAGGCGGAATGCGTGGTGTAGCGGTGAAATGCATAGATATCAC<br>GCAGAACTCCGATTGCGAAGGCAGCTTGCCAAGCCATAACTGACACTGAAGCACGAAAGCGTGGGTATC<br>AAACAGGATTAGATACCCAGTAGTCC         |
|                       | OTU233  | GTGAGGAATATTGGTCAATGGCGGAGAGCCTGAACCAGCCAAGTAGCGTGAAGGATGACTGCCCTATGG<br>GTTGTAAACTTCTTTTATAAAGGAATAAAGTCGGGTATGCATACCCGTTTGCATGTACTTTATGAATAAGG<br>ATCGGCTAACTCCGTGCCAGCAGCCGCGGTAATACGGAGGATCCGAGCGTTATCCGGATTTATTGGGTTT<br>AAAGGGTGCGTAGGTGGTATTTAAGTCAGCGGTGAAAGTTTGTGGCTCAACCATAAAATTGCCGTTGA<br>AACTGGGTTACTTGAGTGTGTTTGGGTAGGCGGAATGCGTGGTGTAGCGGTGAAATGCATAGATATCAC<br>GCAGAACTCCGATTGCGAAGGCAGCTTACTAAACCATAACTGACACTGAAGCACGAAAGCGTGGGGATC<br>AAACAGGATTAGAAACCCAGTAGTCC        |
|                       | OTU879  | GTGAGGAATATTGGTCAATGGCGGAGAGCCTGAACCAGCCAAGTAGCGTGAAGGATGACTGCCCTATGG<br>GTTGTAAACTTCTTTTATAAAGGAATAAAGTCGGGTATGCATACCCGTTTGCATGTACTTTATGAATAAGG<br>ATCGGCTAACTCCGTGCCAGCAGCCGCGGTAATACGGAGGATCCGAGCGTTATCCGGATTTATTGGGTTT<br>AAAGGGTGCGTAGGTGGTATTTAAGTCAGCGGTGAAAGTTTGTGGCTCAACCATAAAATTGCCGTTGA<br>AACTGGGTTACTTGAGTGTGTTTGGGTAGGCGGAATGCGTGGTGTAGCGGTGAAATGCATAGATATCAC<br>GCAGAACTCCGATTGCGAAGGCAGCTTACTAAACCATAACTGACACTGAAGCACGAAAGCGTGGGGATC<br>AAACAGGATTAGAAACCCAGTAGTCC        |
| Streptococcus<br>_unc | OTU294  | GTAGGGAATCTTCGGCAATGGGGGAACCCCTGACCGAGCAACGCCGCGTGAAGGATGAGTGAAGAAGGTTTCGG<br>ATCGTAAAGCTCTGTTGTAGAGAAGAACGGTAATGGGAGTGGAAAATCCATTACGTGACGGTAACTAA<br>CCAGAAAGGGACGGCTAACTACGTGCCAGCAGCCGCGGTAATACGTAGTCCCGAGCGTTGTCCGGATT<br>TATTGGGCGTAAAGCGAGCGCAGGCGGTTGATAAGTCTGAAGTTAAAGGCTGTGGCTTAACCATAGTTC<br>GCTTTGGAACTGTCAAACCTGAGTGCAGAAGGGGAGAGTGAATTCATGTGTAGCGGTGAAATGCGT<br>AGATATATGGAGGAACACCCGTGGCGAAAGCGGCTCTCTGGTCTGTAAGTACGCTGAGGCTCGAAAGC<br>GTGGGGAGCAACAGGATTAGAAACCCAGTAGTCC   |
|                       | OTU1181 | GTAGGGAATCTTCGGCAATGGGGGAACCCCTGACCGAGCAACGCCGCGTGAAGGATGAGTGAAGAAGGTTTCGG<br>ATCGTAAAGCTCTGTTGTAAGTCAAGAACGAGTGTGAGAGTGGAAAATTCACACTGTGACGGTAGCTTA<br>CCAGAAAGGGACGGCTAACTACGTGCCAGCAGCCGCGGTAATACGTAGTCCCGAGCGTTGTCCGGATT<br>TATTGGGCGTAAAGCGAGCGCAGGCGGTTGATAAGTCTGAAGTTAAAGGCTGTGGCTCAACCATAGTTC<br>GCTTTGGAACTGTCAAACCTGAGTGCAGAAGGGGAGAGTGAATTCATGTGTAGCGGTGAAATGCGT<br>AGATATATGGAGGAACACCCGTGGCGAAAGCGGCTCTCTGGTCTGTAAGTACGCTGAGGCTCGAAAGC<br>GTGGGGAGCGAACAGGATTAGAAACCCAGTAGTCC |



|                         |         |                                                                                                                                                                                                                                                                                                                                                                                                                                                                                       |
|-------------------------|---------|---------------------------------------------------------------------------------------------------------------------------------------------------------------------------------------------------------------------------------------------------------------------------------------------------------------------------------------------------------------------------------------------------------------------------------------------------------------------------------------|
|                         | OTU1020 | GTAGGGAATCTTCGGCAATGGACGAAAGTCTGACCGAGCAACGCCCGTGAAGTGAAGAAGGTTTTCCG<br>ATCGTAAAGCTCTGTTGTAAGTCAAGAACGTGTGTGAGAGTGGAAAGTTCACACAGTGACGGTAGCTTA<br>CCAGAAAGGGACGGCTAACTACGTGCCAGCAGCCCGGTAATACGTAGTCCCGAGCGTTGCCGATT<br>TATTGGGCGTAAAGGGAGCGCAGGCGGTGAGGAAAGTCTGGAGTAAAGGCTATGGCTCAACCATAGT<br>TGCTCTGGAACTGTCTGACTTGTGAGTGCAGAAGGGGAGAGTGAATTCCATGTGTAGCGGTGAAATGCG<br>TAGATATATGGAGAACACCAGTGGCGAAAGCGGCTCTCTGGTCTGTCACTGACGCTGAGGCTCGAAAG<br>CGTGGGTAGCGAACAGGATTAGAAACCTAGTAGTCC    |
|                         | OTU655  | GTAGGGAATCTTCGGCAATGGGGCAACCTGACCGAGCAACGCCCGTGAAGTGAAGAAGGTTTTCCG<br>ATCGTAAAGCTCTGTTGTAAGAGAAGAACGAGTGTGAGAGTGGAAAGTTCACACTGTGACGGTAACTTA<br>CCAGAAAGGGACGGCTAACTACGTGCCAGCAGCCCGGTAATACGTAGTCCCGAGCGTTATCCGATT<br>TATTGGGCGTAAAGCGAGCGCAGGCGGTAGATAAGTCTGAAGTAAAGGCTGTGGCTTAACCATAGTAC<br>GCTTTGGAACTGTTAACTTGTGAGTGCAGAAGGGGAGAGTGAATTCCATGTGTAGCGGTGAAATGCGT<br>AGATATATGGAGAACACCCGTGGCGAAAGCGGCTCTCTGGTCTGTAAGTACTGACGCTGAGGCTCGAAAGC<br>GTGGGGAGCAAACAGGATTAGAAACCTAGTAGTCC   |
|                         | OTU45   | GTAGGGAATCTTCGGCAATGGACGGAAGTCTGACCGAGCAACGCCCGTGAAGTGAAGAAGGTTTTCCG<br>ATCGTAAAGCTCTGTTGTAAGAGAAGAACGAGTGTGAGAGTGGAAAGTTCACACTGTGACGGTAACTTA<br>CCAGAAAGGGACGGCTAACTACGTGCCAGCAGCCCGGTAATACGTAGTCCCGAGCGTTATCCGATT<br>TATTGGGCGTAAAGCGAGCGCAGGCGGTAGATAAGTCTGAAGTAAAGGCTGTGGCTTAACCATAGTAC<br>GCTTTGGAACTGTTAACTTGTGAGTGCAGAAGGGGAGAGTGAATTCCATGTGTAGCGGTGAAATGCGT<br>AGATATATGGAGAACACCCGTGGCGAAAGCGGCTCTCTGGTCTGTAAGTACTGACGCTGAGGCTCGAAAGC<br>GTGGGGAGCAAACAGGATTAGAAACCTAGTAGTCC |
| Ruminococcus bromii     | OTU1285 | GTGGGGATATTGCGCAATGGGGCAACCTGACCGAGCAACGCCCGTGAAGGATGAAGGTTTTCCG<br>ATTGTAACCTCTTTTATTAAGGACGAAAATGACGGTACTTAATGAATAAGCTCCGGCTAACTACGTGCC<br>AGCAGCCCGGTAATACGTAGGGAGCAAGCGTTGTCCGATTACTGGGTGAAAGGTCGTAGGCCG<br>CTTTGCAAGTCAGATGTGAAATCTATGGGCTCAACCCATAAAGTCAITTTGAAACTGTAGAGCTTGTAGT<br>AAGTAGAGGCAGGCGAATCCCGTGTAGCGGTGAAATGCGTAGAGATGGGGAGGAACACCAGTGGC<br>GAAGGCGCCTGCTGGGCTTAACTGACGCTGAGGCACGAAAGCGTGGGTAGCAAACAGGATTAGAAA<br>CCCTAGTAGTCC                                     |
| Erysipelotrichaceae_unc | OTU358  | GTAGGGAATTTTCGGCAATGGGGGAAACCTGACCGAGCAACGCCCGTGAAGGAAAGAAGTAATTCGT<br>TATGTAACCTCTGTATAGAGGAAGAACGGTGGATATAGGAATGATATCCAAGTGACGGTACTCTATAA<br>GAAAGCCACGGCTAACTACGTGCCAGCAGCCCGGTAATACGTAGGTGGCAGCGTTATCCGGAATTAT<br>GGGCGTAAAGAGGGAGCAGGCGGCACTAAGGGTCTGTGGTGAAGATCGAAGCTTAACTTCGGTAAAGC<br>CATGGAAACCGTAGAGCTAGAGTGTGTGAGAGGATCGTGAATCCATGTGTAGCGGTGAAATGCGTAG<br>ATATATGGAGGAACACCAGTGGCGAAGGCGAGATCTGGCGCATAACTGACGCTCAGTCCCGAAAGCGT<br>GGGGAGCAAATAGGATTAGAAACCTAGTAGTCC        |
|                         | OTU633  | GTAGGGAATTTTCGGCAATGGGGGAAACCTGACCGAGCAATGCCCGTGAAGTGAAGACGGCCTTCGG<br>GTTGTAAGCTCTGTTGTAAGGGAAGAACGGCATAGAGAGGAATGCTCTATGAGTGACGGTACTTAC<br>CAGAAAGCCACGGCTAACTACGTGCCAGCAGCCCGGTAATACGTAGTGGCAAGCGTTATCCGGAATT<br>ATTGGGCGTAAAGGGTGTGAGGCGGAGATAAGTCTGAGGTAAGGCGGCTCAACCACGGTAA<br>GCCTTGGAACTGTCTGGCTGGAGTGCAGGAGAGGACAATGGAATCCATGTGTAGCGGTGAAATGCGT<br>AGATATATGGAGGAACACCAGTGGCGAAGGCGGTTGTCTGGCCTGTAAGTACTGACGCTGAAAGCAGGAAAGC<br>GTGGGGAGCAAATAGGATTAGAAACCTAGTAGTCC          |
|                         | OTU878  | GTAGGGAATTTTCGGCAATGGGGGAAACCTGACCGAGCAACGCCCGTGAAGGAGGAAGGTCTTCGG<br>ACTGTAACCTCTGTTATAAGGAAGAAGGCGGATACAGGAATGGTATCCGAGTGACGGTACTTTATG                                                                                                                                                                                                                                                                                                                                              |

|                     |         |                                                                                                                                                                                                                                                                                                                                                                                                                                                                                    |
|---------------------|---------|------------------------------------------------------------------------------------------------------------------------------------------------------------------------------------------------------------------------------------------------------------------------------------------------------------------------------------------------------------------------------------------------------------------------------------------------------------------------------------|
|                     |         | AGGAAGCCACGGCTAACTACGTGCCAGCAGCCGCGTAATACGTAGGTGGCAAGCGTTATCCGGAATTA<br>TTGGGCGTAAAGAGGGAGCAGGCGGCAGCAAGGGTCTGTGGTAAAAGACTGAAGCTTAACTTCAGTAA<br>GCCATAGAAAACCGGGCAGCTAGAGTGCAGGAGAGGATCGTGAATCCATGTGTAGCGGTGAAATGCGT<br>AGATATATGGAGGAACACCAGTGGCGAAGGGCAGCATCTGGCCTGCAACTGACGCTCAGTCCCAGAAAGC<br>GTGGGGAGCAAATAGGATTAGAAAACCTAGTAGTCC                                                                                                                                             |
|                     | OTU1032 | GTAGGGAATTTTCGGCAATGGGGGAAACCTGACCGAGCAACGCCGCGTGAAGGAAGAAGGAATTCGT<br>TCTGTAAACTTCTGTATAAAGGAAGAACGGCGGATATAGGAATGATATCCGAGTGACGGTACTTTATGA<br>GAAAGCCACGGCTAACTACGTGCCAGCAGCCGCGTAATACGTAGGTGGCGAGCGTTATCCGGAATATT<br>GGGCGTAAAGAGGGAGCAGGCGGCGCAGAGGTCTGTGGTAAAAGACTGAAGCTTAACTTCAGTAAGC<br>CATAGAAAACCGGGCTGCTAGAGTGCAGGAGAGGATCGTGAATCCATGTGTAGCGGTGAAATGCGTAG<br>ATATATGGAGGAACACCAGTGGCGAAGGGCAGCGTCTGGCCTGTAAGTACGCTCATTCCCAGAAAGCGT<br>GGGGAGCAAATAGGATTAGAAAACCTAGTAGTCC |
|                     | OTU428  | GTAGGGAATTTTCGGCAATGGGGGAAACCTGACCGAGCAACGCCGCGTGAAGGAAGAAGGTTTCGG<br>ATTGTAAACTTCTGTATAGAGGAAGAACGATATATAGGAATGATATATAAGTACGGTACTCTATAAG<br>AAAGCCACGGCTAACTACGTGCCAGCAGCCGCGTAATACGTAGGTGGCGAGCGTTATCCGGAATATTG<br>GGCGTAAAGAGGGAGCAGGCGGCAACAAGGGTCTGTGGTAAAAGACCAGCTTAACTTCGGTAAGCC<br>ATGGAACCGTGGAGCTAGAGTGCAGGAGGATCGTGAATCCATGTGTAGCGGTGAAATGCGTAGA<br>TATATGGAGGAACACCAGTGGCGAAGGGCAGCGTCTGGCGGCAACTGACGCTCAGTCCCAGAAAGCGT<br>GGGGAGCAAATAGGATTAGATAACCTAGTAGTCC          |
|                     | OTU341  | GTAGGGAATTTTCGGCAATGGGGGAAACCTGACCGAGCAACGCCGCGTGAAGGAAGAAGGTTTCGG<br>ATTGTAAACTTCTGTATAAAGGAAGAACGGCGGTACAGGAATGGTAGCCGAGTGACGGTACTTTATT<br>AGAAAGCCACGGCTAACTACGTGCCAGCAGCCGCGTAATACGTAGGTGGCAAGCGTTATCCGGAATTA<br>TTGGGCGTAAAGAGGGAGCAGGCGGCAGCAAGGGTCTGTGGTAAAAGCCTGAAGCTTAACTTCAGTAA<br>GCCATAGAAAACAGGAGCTAGAGTGCAGGAGAGGATCGTGAATCCATGTGTAGCGGTGAAATGCGT<br>AGATATATGGAGGAACACCAGTGGCGAAGGGCAGCATCTGGCCTGCAACTGACGCTCAGTCCCAGAAAGC<br>GTGGGGAGCAAATAGGATTAGAAAACCTAGTAGTCC  |
| Clostridium_u<br>nc | OTU1222 | GTGGGAATATTGCGCAATGGGGGAAACCTGACGCAGCAACGCCGCGTGCAGGAAGAAGGTTTCGG<br>ATTGTAAACTGTTGTCGCAAGGAAGAAGACAGTGACGGTACCTTGTGAGAAAGTCACGGCTAACTACG<br>TGCCAGCAGCCGCGTAATACGTAGGTGACAAGCGTTGTCCGATTACTGGGTGTAAGGGCGCGTAG<br>GCGGACTGTCAAGTCAGTCGTGAAATACCGGGCTTAACCCCGGGCTGCGATTGAAACTGACAGCCTT<br>GAGTATCGGAGAGGAAAGCGGAATCCTAGTGTAGCGGTGAAATGCGTAGATATTAGGAGGAACACCAG<br>TGCGAAGGGCGCTTTCTGGACGACAACCTGACGCTGAGGCGGAAAGTGTGGGGAGCAAACAGGATTA<br>GAAACCTAGTAGTCC                            |
|                     | OTU1223 | GTGGGAATATTGCAATGGGCAGAAAGCCTGATGCAGCAACGCCGCGTGAAGGATGAAGGCTTCGGG<br>TTGTAAAGCTCTGTCTTTGGGACGATAATGACGGTACCAAAGGAGGAAGCCACGGCTAACTACGTGCC<br>AGCAGCCGCGTAATACGTAGGTGGCAAGCGTTGTCCGATTACTGGGCGTAAAGGATGCGTAGGTGG<br>ATATTTAAGTGGGATGTGAAATACCCGAGCTCAACTGGGTGCTGCATTCCAAACTGGATATCTAGAGTGC<br>AGGAGAGGTAAGTGAATCCTAGTGTAGCGGTGAAATGCGTAGAGATTAGGAAGAACACCAGTGGCG<br>AAGGGACTTACTGGACTGTAAGTACACTGAGGCATGAAAGCGTGGGGAGCAAACAGGATTAGAAAC<br>CCTAGTAGTCC                              |
|                     | OTU18   | GTGGGGATATTGCGCAATGGGGGAAACCTGACGCAGCAACGCCGCGTGCAGGAAGAAGGTTTCGG<br>ATTGTAAACTGTTGTCGCAAGGAAGAAGACAGTGACGGTACCTTGTGAGAAAGTCACGGCTAACTACG<br>TGCCAGCAGCCGCGTAATACGTAGGTGACAAGCGTTGTCCGATTACTGGGTGTAAGGGCGCGTAG<br>GCGGATATGCAAGTCAGTCGTGAAATACCGGGCTCAACCCCGGGCTGCGATTGAAACTGTATACCTTG                                                                                                                                                                                             |

|                                  |         |                                                                                                                                                                                                                                                                                                                                                                                                                                                                                |
|----------------------------------|---------|--------------------------------------------------------------------------------------------------------------------------------------------------------------------------------------------------------------------------------------------------------------------------------------------------------------------------------------------------------------------------------------------------------------------------------------------------------------------------------|
|                                  |         | AGTATCGGAGAGGAAAGCGGAATTCCTAGTGTAGCGGTGAAATGCGTAGATATTAGGAGGAAACACCAGT<br>GGCGAAGGCGGCTTTCTGGACGACAACTGACGCTGAGGCGCGAAAGTGTGGGGAGCAAACAGGATTAG<br>AAACCCAGTAGTCC                                                                                                                                                                                                                                                                                                               |
|                                  | OTU594  | GTGGGAATATTGCGCAATGGGGAAACCCTGACGCAGCAACGCCCGTGCAGGAAGAAGTCTTCGG<br>ATTGTAACCTGTTGTCGCGAGGGAAGAAAAGATGACGGTACCTCGTGAGAAAAGTCACGGCTAACTACG<br>TGCCAGCAGCCGCGTAATACGTAGGTGACAAAGCGTGTCCGGATTACTGGGTGTAAGGGCGCGCAG<br>GCGGGACAGCAAGTCAGGAGTGAATACCGGTGCTCAACATCGGGGCTGCTTTTGAACCTGTTGTTCTT<br>GAGTATCGGAGAGGAAAGCGGAATCCCAGTGTAGCGGTGAAATGCGTAGATATTGGGAGGAAACACCAG<br>TGCGAAGGCGGCTTTCTGGACGACAACTGACGCTGAGGCGCGAAAGTGTGGGGAGCAAACAGGATTA<br>GAAACCTAGTAGTCC                     |
| Bifidobacteriu<br>m adolescentis | OTU1195 | GTGGGAATATTGCACAATGGGCACAAGCCTGATGCAGCAGCGCCCGTGCAGGATGACGGCTTCGGG<br>TTGTAAACCGCTTTTACTGGGAGCAAGCCCTTCGGGGTGAAGTGTACCTTTTGAATAAGCACCGGCTAA<br>CTACGTGCCAGCAGCCGCGTAATACGTAGGTGCAAGCGTTATCCGGAATTATGGGCGTAAAGGGCTC<br>GTAGGCGGTTGTCGCGTCCGGTGTAAAGTCCATCGTTAACGGTGGATCCGCGCCGGGTACGGGCGG<br>GCTTGAGTCCGGTAGGGGAGACTGGAATCCCAGTGTAAAGCGTGAATGTGTAGATATCGGGAAGAACA<br>CCAATGGCGAAGGCGGCTCTTGGCCGCTACTGACGCTGAGGAGCGAAAGCGTGGGGAGCGAACAG<br>GATTAGAAACCTAGTAGTCC                  |
| Streptococcus<br>infantis        | OTU786  | GTAGGAATCTTCGGCAATGGACGGAAGTCTGACCGAGCAACGCCCGTGCAGTGAAGAAGGTTTCGG<br>ATCGTAAAGCTCTGTTGTAAGAGAAGAACGAGTGTGAGAGTGGAAAGTTCACACTGTGACGGTATCTTA<br>CCAGAAAGGGACGGCTAACTACGTGCCAGCAGCCGCGTAATACGTAGTCCCGAGCGTGTCCGGATT<br>TATTGGGCGTAAAGCGAGCGCAGGCGGTAGATAAGTCTGAAGTTAAAGGCTGTGGCTTAACCATAGTAC<br>GCTTTGAAACTGTTAACTTGAAGTGAAGAGGGGAGAGTGAATCCATGTGTAGCGGTGAAATGCGT<br>AGATATATGGAGGAACACCGGTGGCGAAAGCGGCTCTCTGGCTGTAACTGACGCTGAGGCTCGAAAGC<br>GTGGGGAGCAAACAGGATTAGAAACCTAGTAGTCC |
| Rothia<br>mucilaginosa           | OTU73   | GTGGGAATATTGCACAATGGGCACAAGCCTGATGCAGCAGCGCCCGTGCAGGATGACGGCTTCGGG<br>TTGTAAACCTCTGTAGCAGGGAAGAAGAAATTGACGGTACCTGCAGAGAAAGCGCCGCTAACTAC<br>GTGCCAGCAGCCGCGTAATACGTAGGCGCGAGCGTGTCCGGAATTATTGGGCGTAAAGAGCTTGTA<br>GGCGGTTTGTGCGTCTGCTGTGAAAGCCGGGCTTAACCCGTTGATTGCAGTGGTACGGGAGAC<br>TAGAGTGCAGTAGGGGAGACTGGAATCCTGGTGTAGCGGTGAAATGCGCAGATATCAGGAAGAACAC<br>CGATGGCGAAGGCGGCTCTGGGCTGTAACCTGACGCTGAGAAGCGAAAGCATGGGGAGCGAACAGGA<br>TTAGAAACCTAGTAGTCC                           |
| Rhodococcus_<br>unc              | OTU494  | GTGGGAATATTGCACAATGGGCACAAGCCTGATGCAGCAGCGCCCGTGCAGGATGACGGCTTCGGG<br>TTGTAAACCTCTTTCAGCAGGGAAGCGCAAGTACGGTACCTGCAGAGAAGCACCGGCTAACTA<br>CGTGCCAGCAGCCGCGTAATACGTAGGTGCAAGCGTGTCCGGAATTACTGGGCGTAAAGAGTTCGT<br>AGGCGGTTTGTGCGTCTGTTGTGAAAACAGCAGCTCAACTGCTGGCTTGCAGGCGATACGGGAGAC<br>TTGAGTACTGCAGGGGAGACTGGAATCCTGGTGTAGCGGTGAAATGCGCAGATATCAGGAGGAACACC<br>GGTGGCGAAGGCGGCTCTGGGCGTAACTGACGCTGAGGAACGAAAGCGTGGGTAGCGAACAGGAT<br>TAGATACCCTAGTAGTCC                           |
| Rs-045_unc                       | OTU1049 | GTGAGGAATATTGCACAATGAGCGAAAGCTTGTAGGAGCAATGCCCGTGCAGGATGAAAGCCCTCGGG<br>TTGTAAACTGCTTTTATAAGAGAAGATTATGACGGTAACTTATGAATAAGGGACGGCTAACTACGTCCA<br>GCAGCCGCGTACATAGTCCGAGCGTATCCGGAGTACTGGGCGTAAAGAGTTGCGTAGGCGG<br>TCAAGTTAGCGAGCGATGAAAACCTATCGGCTCAACCGATAGCTTGTGTTGCAACTGCTTACTGAGAG<br>TATCAGAGGTCGCTGGAATCCTAGTGTAGCAGTGAATGCGTAGATATTAGGAAGAACACCGATGGCGT<br>AGGCAGGCGACTGGGATATTCTGACGCTAAGGCACGAAAGCGTGGGTAGCGAACCGGATTAGATACC                                          |

|                     |         |                                                                                                                                                                                                                                                                                                                                                                                                                                                                                                                        |
|---------------------|---------|------------------------------------------------------------------------------------------------------------------------------------------------------------------------------------------------------------------------------------------------------------------------------------------------------------------------------------------------------------------------------------------------------------------------------------------------------------------------------------------------------------------------|
|                     |         | CTGTAGTCC                                                                                                                                                                                                                                                                                                                                                                                                                                                                                                              |
| F16_unc             | OTU1290 | GTAGGGAATCTTTCACAATGGGCGAAAGCCTGATGGAGCAATGCCCGTGCAGGACGAAGGCCCTTCGGG<br>TTGTAAACTGCTTTTATAAGCGAGAAATATGATGGTAACTTATGAATAAGGATCGGC <sup>TAAC</sup> TACGTGCCAG<br>CAGCCCGGTCATACGTAGGATCCGAGCATTATCCGGAGTGACTGGGTG <sup>TAA</sup> AGAGTTGCGTAGGTGGC<br>AAGGTAAGTAGATAGT <sup>GAA</sup> ATCTGGTGGCTCAACCATTCAGACTATTATCTAAACTATCTAGCTCGAGACT<br>GTTATGGGTA <sup>ACT</sup> GGAATTTCTAGTGTAGGAGTGAAATCCGTAGATATTAGAAGGAACACCGATAGCGTA<br>GGCAGGTTACTGGGACAGTTCTGACACTAAGGCACGAAAGCGTAGGGAGCAAACGGGATTAGAAACCC<br>CTGTAGTCC |
| Bacteroides_u<br>nc | OTU886  | GTGAGGAATATTGGTCAATGGGCGAGAGCCTGAACCAGCCAAGTAGCGTGCAGGATGACGGCCCTATGG<br>GTTGTAAACTGCTTTTATAAGGGAATAAAGTGAGTCTCGTGAGACTTTTGCATGTACCTTATGAATAAGG<br>ACCGGCTAATTCCGTGCCAGCAGCCCGGTAATACGGAAGGTCGGGCGTTATCCGATTTATTGGGTTT<br>AAAGGGAGCGTAGATGGATGTTAAGTCAGTTGTGAAAGTTTGC <sup>GGCT</sup> CAACCGTAAAATTGCAGTTGA<br>TACTGGATATCTTGAGTGCAGTTGAGGCAGCGGAATTCGTGGTGTAGCGGTGAAATGCTTAGATATCAC<br>GAAGAACTCCGATTGCGAAGGCAGCCTGCTAAGCTGCAACTGACATTGAGGCTCGAAAGTGTGGGTATC<br>AAACAGGATTAGAAACCTAGTAGTCC                            |
|                     | OTU885  | GTGAGGAATATTGGTCAATGGGCGAGAGCCTGAACCAGCCAAGTAGCGTGAAGGATGAAGGTCTACGG<br>ATTGTAAACTTCTTTTATACGGGAATAAAGTTTCTACGTGTAGGATTTTGTATGTACCGTATGAATAAGCA<br>TCGGCTAACTCCGTGCCAGCAGCCCGGTAATACGGAAGGATGCGAGCGTTATCCGATTTATTGGGTTA<br>AAGGGAGCGCAGACGGGAGATTAAGTCAGTTGTGAAAGTTTGC <sup>GGCT</sup> CAACCGTAAAATTGCAGTTGAT<br>ACTGGATATCTTGAGTGCAGTTGAGGCAGCGGAATTCGTGGTGTAGCGGTGAAATGCTTAGATATCACG<br>AAGA <sup>ACT</sup> CCGATTGCGAAGGCAGCCTGCTAAGCTGCAACTGACATTGAGGCTCGAAAGTGTGGGTATCA<br>AACAGGATTAGAAACCTAGTAGTCC              |
|                     | OTU231  | GTGAGGAATATTGGTCAATGGGCGAGAGCCTGAACCAGCCAAGTAGCGTGAAGGATGAAGGTCTATGG<br>GTCGTAAACTTCTTTTATATGGGAATAAAGTTTCCACGTGTGGAATTTTGTATGTACCATATGAATAAGGA<br>TCGGCTAACTCCGTGCCAGCAGCCCGGTAATACGGAAGGATCCGAGCGTTATCCGATTTATTGGGTTA<br>AAGGGAGCGTAGATGGATGTTAAGTCAGTTGTGAAAGTTTGC <sup>GGCT</sup> CAACCGTAAAATTGCAGTTGATA<br>CTGGATATCTTGAGTGCAGTTGAGGCAGCGGAATTCGTGGTGTAGCGGTGAAATGCTTAGATATCACGA<br>AGA <sup>ACT</sup> CCGATTGCGAAGGCAGCCTGCTAAGCTGCAACTGACATTGAGGCTCGAAAGTGTGGGTATCAA<br>ACAGGATTAGAAACCTAGTAGTCC               |
|                     | OTU977  | GTGAGGAATATTGGTCAATGGACGAGAGTCTGAACCAGCCAAGTAGCGTGAAGGATGACTGCCCTATGG<br>GTTGTAAACTTCTTTTATATGGGAATAAAGTGAGCCACGTGTGGCTTTTGTATGTACCATAACGAATAAGG<br>ATCGGCTAACTCCGTGCCAGCAGCCCGGTAATACGGAAGGATCCGAGCGTTATCCGATTTATTGGGTTT<br>AAAGGGAGCGTAGGCGGACTATTAAGTCAGCTGTGAAAGTTTGC <sup>GGCT</sup> CAACCGTAAAATTGCAGTTGA<br>TACTGGTCTGTTGAGTGCAGTAGAGGTAGGCGGAATTCGTGGTGTAGCGGTGAAATGCTTAGATATCAC<br>GAAGAACTCCGATTGCGAAGGCAGCCTACTGGACTGTA <sup>ACT</sup> GACGCTGATGCTCGAAAGTGTGGGTATCA<br>AACAGGATTAGATACCTAGTAGTCC           |
|                     | OTU846  | GTGAGGAATATTGGTCAATGGGCGAGAGCCTGAACCAGCCAAGTAGCGTGAAGGATGACTGCCCTATGG<br>GTTGTAAACTTCTTTTATAAGGAATAAAGTCGGGTATGCATACCCGTTTGCATGTACTTTATGAATAAGG<br>ATCGGCTAACTCCGTGCCAGCAGCCCGGTAATACGGAAGGATCCGAGCGTTATCCGATTTATTGGGTTT<br>AAAGGGTGC <sup>TAG</sup> CGGTTTATTAAGTTAGTGGTAAATATTTGAGCTAAACTCAATTGTGCCATTAATAC<br>TGGTAAACTGGAGTACAGACGAGGTAGGCGGAATTCGTGGTGTAGCGGTGAAATGCTTAGATATCACGA<br>AGA <sup>ACT</sup> CCGATTGCGAAGGCAGCCTGCTAAGCTGCAACTGACATTGAGGCTCGAAAGTGTGGGTATCAA<br>ACAGGATTAGAAACCTGGTAGTCC               |
|                     | OTU841  | GTGAGGAATATTGGTCAATGGGCGAGAGCCTGAACCAGCCAAGTAGCGTGAAGGATGAAGGTCTACGG                                                                                                                                                                                                                                                                                                                                                                                                                                                   |

|         |                                                                                                                                                                                                                                                                                                                                                                                                                                                                                                         |
|---------|---------------------------------------------------------------------------------------------------------------------------------------------------------------------------------------------------------------------------------------------------------------------------------------------------------------------------------------------------------------------------------------------------------------------------------------------------------------------------------------------------------|
|         | <p>ATTGTAAACTTCTTTTATACGGGAATAAAGTTTCTACGTGAGGATTTTGTATGTACCGTATGAATAAGCA<br/> TCGGCTAACTCCGTGCCAGCAGCCCGGTAATACGGAGGATGCGAGCGTTATCCGGATTTATTGGGTTA<br/> AAGGGAGCGCAGACGGGAGATTAAGTCAGTTGTGAAAGTTTTCGGCTCAACCGTAAAATTGCAGTTGAT<br/> ACTGGCGACCTTGAGTGCAACAGAGGTAGGCGGAATTCGTGGTGTAGCGGTGAAATGCTTAGATATCAC<br/> GAAGAACTCCGATTGCGAAGGCAGCTTACTGGATTGTAAGTACGCTGATGCTCGAAAGTGTGGGTATC<br/> AAACAGGATTAGAAACCCCTGTAGTCC</p>                                                                                |
| OTU932  | <p>GTGAGGAATATTGGTCAATGGGCGAGAGCCTGAACCAGCCAAGTAGCGTGAAGGATGACTGCCCTATGG<br/> GTTGTAAACTTCTTTTATAAAGGAATAAAGTCGGGTATGCATACCCGTTTGCATGTACTTTATGAATAAGG<br/> ATCGGCTAACTCCGTGCCAGCAGCCCGGTAATACGGAGGATCCGAGCGTTATCCGGATTTATTGGGTTT<br/> AAAGGGAGCGTAGGCGGTTGTTAAGTCAGTTGTGAAAGTTTTCGGCTCAACCGTAAAATTGCAGTTGA<br/> TACTGGCGACCTTGAGTGCAACAGAGGTAGGCGGAATTCGTGGTGTAGCGGTGAAATGCTTAGATATCAC<br/> GAAGAACTCCGATTGCGAAGGCAGCTTACTGGATTGTAAGTACGCTGATGCTCGAAAGTGTGGGTATC<br/> AAACAGGATTAGAAACCCCTAGTAGTCC</p>  |
| OTU930  | <p>GTGAGGAATATTGGTCAATGGGCGTAGCCTGAACCAGCCAAGTAGCGTGAAGGATGAAGGCTCTATGG<br/> GTCGTAAACTTCTTTTATAAAGAATAAAGTGCAGTATGTACTGTTTGTATGTATTATGAATAAGGAT<br/> CGGCTAACTCCGTGCCAGCAGCCCGGTAATACGGAGGATCCGAGCGTTATCCGGATTTATTGGGTTAA<br/> AGGGAGCGTAGATGGATGTTAAGTCAGTTGTGAAAGTTTTCGGCTCAACCGTAAAATTGCAGTTGATA<br/> TGGATATCTTGAGTGCAAGTGGCAGGCGGAATTCGTGGTGTAGCGGTGAAATGCTTAGATATCACGAA<br/> GAACTCCGATTGCGAAGGCAGCCTGCTAAGCTGCAACTGACATTGAGGCTCGAAAGTGTGGGTATCAA<br/> CAGGATTAGAAACCCCTAGTAGTCC</p>             |
| OTU931  | <p>GTGAGGAATATTGGTCAATGGACGAGAGTCTGAACCAGCCAAGTAGCGTGAAGGATGACTGCCCTATGG<br/> GTTGTAAACTTCTTTTATACGGGAATAAAGTGAGCCACGTGTGGCTTTTGTATGTACCGTATGAATAAGG<br/> ATCGGCTAACTCCGTGCCAGCAGCCCGGTAATACGGAGGATCCGAGCGTTATCCGGATTTATTGGGTTT<br/> AAAGGGAGCGTAGGCGGTTGTTAAGTCAGTTGTGAAAGTTTTCGGCTCAACCGTAAAATTGCAGTTGA<br/> TACTGGCGACCTTGAGTGCAACAGAGGTAGGCGGAATTCGTGGTGTAGCGGTGAAATGCTTAGATATCAC<br/> GAAGAACTCCGATTGCGAAGGCAGCTTACTGGATTGTAAGTACGCTGATGCTCGAAAGTGTGGGTATC<br/> AAACAGGATTAGATACCCCTAGTAGTCC</p>   |
| OTU1150 | <p>GTGAGGAATATTGGTCAATGGACGAGAGTCTGAACCAGCCAAGTAGCGTGAAGGATGACTGCCCTATGG<br/> GTTGTAAACTTCTTTTATACGGGAATAAAGTGATCCACGTGTGGATTTTGTATGTACCGTATGAATAAGG<br/> ATCGGCTAACTCCGTGCCAGCAGCCCGGTAATACGGAGGATCCGAGCGTTATCCGGATTTATTGGGTTT<br/> AAAGGGAGCGTAGGTTGATTGTTAAGTCAGTTGTGAAAGTTTTCGGCTCAACCGTAAAATTGCAGTTGA<br/> TACTGGCAGTCTTGAGTACAGTAGAGGTGGGCGGAATTCGTGGTGTAGCGGTGAAATGCTTAGATATCAC<br/> GAAGAACTCCGATTGCGAAGGCAGCTTACTGGACTGCAACTGACACTGATGCTCGAAAGTGTGGGTATC<br/> AAACAGGATTAGATACCCCTAGTAGTCC</p> |
| OTU752  | <p>GTGAGGAATATTGGTCAATGGGCGAGAGCCTGAACCAGCCAAGTAGCGTGAAGGATGACTGCCCTATGG<br/> GTTGTAAACTTCTTTTATAAAGGAATAAAGTCGGGTATGGATACCCGTTTGCATGTACTTTATGAATAAGG<br/> ATCGGCTAACTCCGTGCCAGCAGCCCGGTAATACGGAGGATCCGAGCGTTATCCGGATTTATTGGGTTT<br/> AAAGGGAGCGTAGGCGGACGCTTAAGTCAGTTGTGAAAGTTTTCGGCTCAACCGTAAAATTGCAGTTGA<br/> TACTGGGTGTCTTGAGTACAGTAGAGGCGGGAATTCGTGGTGTAGCGGTGAAATGCTTAGATATCAC<br/> GAAGAACTCCGATTGCGAAGGCAGCTTGTGGACTGTAAGTACGCTGATGCTCGAAAGTGTGGGTATC<br/> AAACAGGATTAGAAACCCCTGTAGTCC</p>      |
| OTU806  | <p>GTGAGGAATATTGGTCAATGGACGAGAGTCTGAACCAGCCAAGTAGCGTGAAGGATGAAGGTCTACGG<br/> ATTGTAAACTTCTTTTATAAAGGAATAAACCCTCCACGTGTGGGAGCTTGTATGTACTTTATGAATAAGC<br/> ATCGGCTAACTCCGTGCCAGCAGCCCGGTAATACGGAGGATCCGAGCGTTATCCGGATTTATTGGGTTT</p>                                                                                                                                                                                                                                                                      |

|         |                                                                                                                                                                                                                                                                                                                                                                                                                                                            |
|---------|------------------------------------------------------------------------------------------------------------------------------------------------------------------------------------------------------------------------------------------------------------------------------------------------------------------------------------------------------------------------------------------------------------------------------------------------------------|
|         | AAAGGGAGCGTAGATGGGTTGTTAAGTCAGTTGTGAAAGTTGCGGCTCAACCGTAAAATTGCAATTGATCTGGCAGTCTTGAGTACAGTTGAGGTAGGCGGAATTCGTGGTGTAGCGGTGAAATGCTTAGATATCACGAAGAACTCCGATTGCGAAGGCAGCTTACTAACCTGTAAGTACATTGATGCTCGAAAGTGTGGGTATCAAAACAGGATTAGAAAACCCAGTAGTCC                                                                                                                                                                                                                  |
| OTU1094 | GTGAGGAATATTGGTCAATGGGCGATGGCCTGAACCAGCCAAGTAGCGTGAAGGATGACTGCCCTATGGTTGTAAACTTCTTTTATAAAGGAATAAAGTCGGGTATGCATACCCGTTTGCATGTACTTTATGAATAAGGATCGGCTAACTCCGTGCCAGCAGCCGCGTAATACGGAGGATCCGAGCGTTATCCGGATTTATTGGGTTTAAAGGGAGCGTAGATGGATGTTAAGTCAGTTGTGAAAGTTGCGGCTCAACCGTAAAATTGCAAGTGTACTGGATGCTTGAGTGCAGTTGAGGCAGGCGGAATTCGTGGTGTAGCGGTGAAATGCTTAGATATCACGAAGAACTCCGATTGCGAAGGCAGCTGCTAACCTGCAACTGACATTGAGGCTCGAAAGTGTGGGTATCAAAACAGGATTAGAAAACCTAGTAGTCC    |
| OTU818  | GTGAGGAATATTGGTCAATGGGCGCAGGCCTGAACCAGCCAAGTAGCGTGAAGGATGACTGCCCTATGGTTGTAAACTTCTTTTATATGGGAATAAAGTTTCCACGTGTGGAATTTGTATGTACCATATGAATAAGGATCGGCTAACTCCGTGCCAGCAGCCGCGTAATACGGAGGATCCGAGCGTTATCCGGATTTATTGGGTTTAAAGGGAGCGTAGGTGGACAGTTAAGTCAGTTGTGAAAGTTGCGGCTCAACCGTAAAATTGCAGTTGATACTGGCTGTCTTGAGTACAGTAGAGGTGGCGGAATTCGTGGTGTAGCGGTGAAATGCTTAGATATCACGAAGAACTCCGATTGCGAAGGCAGCTCACTGGACTGCAACTGACACTGATGCTCGAAAGTGTGGGTATCAAAACAGGATTAGATACCTAGTAGTCC    |
| OTU762  | GTGAGGAATATTGGTCAATGGGCGCAGCCTGAACCAGCCAAGTAGCGTGAAGGATGACTGCCCTATGGTTGTAAACTTCTTTTATAAAGGAATAAAGTCTATTACGTGTAATAGTTTGTATGTACTTTATGAATAAGCATCGGCTAACTCCGTGCCAGCAGCCGCGTAATACGGAGGATGCGAGCGTTATCCGGATTTATTGGGTTTAAAGGGAGCGTAGATGGGATTTAAGTCAGCTGTGAAAGTTGAGGCTCAACCTTAAAATTGCAGTTGAAACTGGGATTTCTTGAGTATGGATGCGGTAGGCGGAATTCGTGGTGTAGCGGTGAAATGCTTAGATATCACGAAGAACTCCGATTGCGAAGGCAGCTTACTAAGCCATAACTGACATTGATGCTCGAAAGTGTGGGTATCAAAACAGGATTAGATACCCGAGTAGTCC |
| OTU405  | GTGAGGAATATTGGTCAATGGACGAGAGTCTGAACCAGCCAAGTAGCGTGAAGGATGAAGGTTCTATGGATTGTAAACTTCTTTTATACGGGAATAAACGAATCCACGTGTGGATTTTGCATGTACCGTATGAATAAGGATCGGCTAACTCCGTGCCAGCAGCCGCGTAATACGGAGGATCCGAGCGTTATCCGGATTTATTGGGTTTAAAGGGAGCGTAGATGGGTTGTTAAGTCAGTTGTGAAAGTTGCGGCTCAACCGTAAAATTGCAATTGTACTGGCAGTCTTGAGTACAGTTGAGGTAGGCGGAATTCGTGGTGTAGCGGTGAAATGCTTAGATATCACGAAGAACTCCGATTGCGAAGGCAGCTTACTAACCTGTAAGTACATTGATGCTCGAAAGTGTGGGTATCAAAACAGGATTAGAAAACCTAGTAGTCC  |
| OTU792  | GTGAGGAATATTGGTCAATGGACGAGAGTCTGAACCAGCCAAGTAGCGTGAAGGATGACTGCCCTATGGTTGTAAACTTCTTTTATACGGGAATAAAGTGAGCCACGTGTGGCTTTTGTATGTACCGTATGAATAAGGATCGGCTAACTCCGTGCCAGCAGCCGCGTAATACGGAGGATCCGAGCGTTATCCGGATTTATTGGGTTTAAAGGGAGCGTAGGCGGGTTGTTAAGTCAGTTGTGAAAGTTGCGGCTCAACCGTAAAATTGCAAGTGTACTGGCGACCTTGAGTGCAACAGAGGTAGGCGGAATTCGTGGTGTAGCGGTGAAATGCTTAGATATCACGAAGAACTCCGATTGCGAAGGCAGCTTACTGGATTGTAAGTACGCTGATGCTCGAAAGTGTGGGTATCAAAACAGGATTAGAAAACCTAGTAGTCC   |
| OTU791  | GTGAGGAATATTGGTCAATGGGCGAGAGCCTGAACCAGCCAAGTAGCGTGAAGGATGACTGCCCTATGGTTGTAAACTTCTTTTATAAAGGAATAAAGTCGGGTATGCATACCCGTTTGCATGTACTTTATGAATAAGGATCGGCTAACTCCGTGCCAGCAGCCGCGTAATACGGAGGATCCGAGCGTTATCCGGATTTATTGGGTTTAAAGGGAGCGTAGGCGGGCTTTAAGTCAGCGGTCAAATGCCACGGCTCAACCGTGCCAGCCGTTGAAGTCAAGCCTTGAGTCTGCACAGGACATGGAATTCGTGGTGTAGCGGTGAAATGCTTAGATATCAC                                                                                                       |

|         |                                                                                                                                                                                                                                                                                                                                                                                                                                                                                    |
|---------|------------------------------------------------------------------------------------------------------------------------------------------------------------------------------------------------------------------------------------------------------------------------------------------------------------------------------------------------------------------------------------------------------------------------------------------------------------------------------------|
|         | GAAGAACTCCGATTGCGAAGGCAGCTTACTGGATTGTAAGTACGCTGATGCTCGAAAGTGTGGGTATC<br>AAACAGGATTAGATACCCTTGTAGTCC                                                                                                                                                                                                                                                                                                                                                                                |
| OTU928  | GTGAGGAATATTGGTCAATGGGCGGAAGCCTGAACCAGCCAAGTAGCGTGAAGGATGACTGCCCTATGG<br>GTTGTAAACTTCTTTTATAGGGAATAAAATGAGCCACGTGTGGCTTTTGTATGTACCCTATGAATAAGG<br>ATCGGCTAACTCCGTGCCAGCAGCCGCGTAATACGGAGGATCCGAGCGTTATCCGGATTTAATTGGGTTT<br>AAAGGGAGCGTAGGTGGACATGTAAGTCAGTTGTGAAAGTTGCGGCTCAACCGTAAAATTGCAGTTGA<br>TACTGTGTCTTGTAGTACAGTAGAGGTGGGCGGAATTCGTGGTGTAGCGGTGAAATGCTTAGATATCAC<br>GAAGAACTCCGATTGCGAAGGCAGCTCACTGGACTGTACTGACACTGAGGCTCGAAAGTGTGGGTATC<br>AAACAGGATTAGATACCCTAGTAGTCC   |
| OTU356  | GTGAGGAATATTGGTCAATGGGCGCAGGCCTGAACCAGCCAAGTAGCGTGAAGGATGACTGCCCTATGG<br>GTTGTAAACTTCTTTTATAGGGAATAAAGTGCAGGACGTGTCTGTTTGTATGTACCATATGAATAAGG<br>ATCGGCTAACTCCGTGCCAGCAGCCGCGTAATACGGAGGATCCGAGCGTTATCCGGATTTAATTGGGTTT<br>AAAGGGAGCGTAGGCGGGTGTAAAGTCAGTTGTGAAAGTTGCGGCTCAACCGTAAAATTGCAGTTGA<br>TACTGGGTACCTTGTAGTGCAGTAGAGGTAGGCGGAATTCGTGGTGTAGCGGTGAAATGCTTAGATATCAC<br>GAAGAACTCCGATTGCGAAGGCAGCTTGTCTGGACTGTAAGTACGCTGATGCTCGAAAGTGTGGGTATC<br>AAACAGGATTAGAAACCCCTGTAGTCC  |
| OTU1130 | GTGAGGAATATTGGTCAATGGGCGAAGGCCTGAACCAGCCAAGTAGCGTGAAGGATGACTGCCCTATGG<br>GTTGTAAACTTCTTTTATAGGGAATAAAGTGCACCTACGTGTAGGTGTTTGTATGTACCATATGAATAAGGA<br>TCGGCTAACTCCGTGCCAGCAGCCGCGTAATACGGAGGATCCGAGCGTTATCCGGATTTAATTGGGTTT<br>AAGGGTGCAGTAGGTGGAGATTAAGTCAGTTGTGAAAGTTGCGGCTCAACCGTAAAATTGCAGTTGAT<br>ACTGGATTCTTGTAGTATAGTTGAGGTAGGCGGAATTCGTGGTGTAGCGGTGAAATGCTTAGATATCACG<br>AAGAACTCCGATTGCGTAGGCAGCTTACTAACTATAACTGACACTGAGGCACGAAAGTGTGGGTATCA<br>AACAGGATTAGAAACCCCTGTAGTCC |
| OTU1131 | GTGAGGAATATTGGTCAATGGACGAGAGTCTGAACCAGCCAAGTAGCGTGAAGGATGACTGCCCTATGG<br>GTTGTAAACTTCTTTTATAGGGAATAAAGTGGTCCACGTGTGGATTTTGTATGTACCATATGAATAAGGA<br>TCGGCTAACTCCGTGCCAGCAGCCGCGTAATACGGAGGATCCGAGCGTTATCCGGATTTAATTGGGTTT<br>AAGGGAGCGTAGGTGGACAGTAAAGTCAGTTGTGAAAGTTGCGGCTCAACCGTAAAATTGCAGTTGAT<br>ACTGGCTGTCTTGTAGTACAGTAGAGGTGGGCGGAATTCGTGGTGTAGCGGTGAAATGCTTAGATATCACG<br>AAGAACTCCGATTGCGAAGGCAGCTCACTGGACTGCAACTGACACTGATGCTCGAAAGTGTGGGTATCA<br>AACAGGATTAGATACCCTTGTAGTCC |
| OTU1313 | GTGAGGAATATTGGTCAATGGGCGAGAGCCTGAACCAGCCAAGTAGCGTGAAGGATGAAGGCTCTATGG<br>GTCGTAAACTTCTTTTATAGGGAATAAAGTTTCCACGTGTGGAATTTTGTATGTACCATATGAATAAGGA<br>TCGGCTAACTCCGTGCCAGCAGCCGCGTAATACGGAGGATCCGAGCGTTATCCGGATTTAATTGGGTTT<br>AAGGGAGCGTAGGCGGGTGTAAAGTCAGTTGTGAAAGTTGCGGCTCAACCGTAAAATTGCAGTTGAT<br>ACTGGCGACCTTGTAGTCAACAGAGGTAGGCGGAATTCGTGGTGTAGCGGTGAAATGCTTAGATATCAC<br>GAAGAACTCCGATTGCGAAGGCAGCTTACTGGATTGTAAGTACGCTGATGCTCGAAAGTGTGGGTATC<br>AAACAGGATTAGAAACCCCTGTAGTCC    |
| OTU717  | GTGAGGAATATTGGTCAATGGGCGGTAGCCTGAACCAGCCAAGTAGCGTGAAGGATGAAGGTTCTATGG<br>ATTGTAAACTTCTTTTATAAAGGAATAAAGTGAAGGCACGTGTGCCTTTTGTATGTACTTTATGAATAAGG<br>ATCGGCTAACTCCGTGCCAGCAGCCGCGTAATACGGAGGATCCGAGCGTTATCCGGATTTAATTGGGTTT<br>AAAGGGAGCGTAGATGGGTTGTAAGTCAGTTGTGAAAGTTGCGGCTCAACCGTAAAATTGCAATTGA<br>TACTGGGTCCTTGTAGTACAGTTGAGGTGGGCGGAATTCGTGGTGTAGCGGTGAAATGCTTAGATATCAC<br>GAAGAACTCCTATTGCGAAGGCAGCTCACTAACTGCAACTGACATTGAGGCTCGAAAGTGTGGGTATC<br>AAACAGGATTAGATACCCTAGTAGTCC |

|         |                                                                                                                                                                                                                                                                                                                                                                                                                                                                                                         |
|---------|---------------------------------------------------------------------------------------------------------------------------------------------------------------------------------------------------------------------------------------------------------------------------------------------------------------------------------------------------------------------------------------------------------------------------------------------------------------------------------------------------------|
| OTU176  | <p>GTGAGGAATATTGGTCAATGGACGAGAGTCTGAACCAGCCAAGTAGCGTGAAGGATGAAGGTCTACGG<br/> ATTGTAACTTCTTTTATAAGGGAATAAACCCCTCCCACGTGTGGGAGCTTGTATGTACCTTATGAATAAGC<br/> ATCGGCTAACTCCGTGCCAGCAGCCGCGGTAATACGGAGGATGCGAGCGTTATCCGGATTATTGGGTTT<br/> AAAGGGAGCGTAGATGGATGTTAAGTCAGTTGTGAAAGTTTGC GGCTCAACCGTAAAATTGCAGTTGA<br/> TACTGGATATCTTGAGTGCAGTTGAGGCAGCGGAATTCGTGGTGTAGCGGTGAAATGCTTAGATATCAC<br/> GAAGAACTCCGATTGCGAAGGCAGCTGCTAAGCTGCAACTGACATTGAGGCTCGAAAGTGTGGGTATC<br/> AAACAGGATTAGAAACCCCTAGTAGTCC</p>   |
| OTU1295 | <p>GTGAGGAATATTGGTCAATGGACGAGAGTCTGAACCAGCCAAGTAGCGTGAAGGATGAAGGTCTACGG<br/> ATTGTAACTTCTTTTATAAGGGAATAAACCCCTCCCACGTGTGGGAGCTTGTATGTACCTTATGAATAAGC<br/> ATCGGCTAACTCCGTGCCAGCAGCCGCGGTAATACGGAGGATGCGAGCGTTATCCGGATTATTGGGTTT<br/> AAAGGGAGCGTAGGCGGACGCTTAAGTCAGTTGTGAAAGTTTGC GGCTCAACCGTAAAATTGCAGTTGA<br/> TACTGGGTGTCTTGAGTACAGTAGAGGCAGCGGAATTCGTGGTGTAGCGGTGAAATGCTTAGATATCAC<br/> GAAGAACTCCGATTGCGAAGGCAGCTTGCTGGACTGTAACCTGACGCTGATGCTCGAAAGTGTGGGTATC<br/> AAACAGGATTAGATACCCTAGTAGTCC</p> |
| OTU1002 | <p>GTGAGGAATATTGGTCAATGGGCGCAGGCCTGAACCAGCCAAGTAGCGTGAAGGATGACTGCCCTATGG<br/> GTTGTAACTTCTTTTATATGGAATAAAGTTTCCACGTGTGGAATTTGTATGTACCATATGAATAAGGA<br/> TCGGCTAACTCCGTGCCAGCAGCCGCGGTAATACGGAGGATCCGAGCGTTATCCGGATTATTGGGTTA<br/> AAGGGAGCGTAGGTGGACAGTTAAGTCAGTTGTGAAAGTTTGC GGCTCAACCGTAAAATTGCAGTTGAT<br/> ACTGGCTGTCTTGAGTACAGTAGAGGTGGCGGAATTCGTGGTGTAGCGGTGAAATGCTTAGATATCACG<br/> AAGAACTCCGATTGCGAAGGCAGCTCACTGGACTGCAACTGACACTGATGCTCGAAAGTGTGGGTATCA<br/> AACAGGATTAGAAACCCCTAGTAGTCC</p>     |
| OTU216  | <p>GTGAGGAATATTGGTCAATGGGCGAGAGCCTGAACCAGCCAAGTAGCGTGAAGGATGAAGGTCTACGG<br/> ATTGTAACTTCTTTTATACGGGAATAAAGTTTCCTACGTGTAGGATTTGTATGTACCGTATGAATAAGCA<br/> TCGGCTAACTCCGTGCCAGCAGCCGCGGTAATACGGAGGATGCGAGCGTTATCCGGATTATTGGGTTA<br/> AAGGGAGCGCAGACGGGTCGTTAAGTCAGCTGTGAAAGTTTGGGGCTCAACCTAAAATTGCAGTTGAT<br/> ACTGGCTCCTTGAGTGCGGTTGAGGTGTGCGGAATTCGTGGTGTAGCGGTGAAATGCTTAGATATCACG<br/> AAGAACCCCGATTGCGAAGGCAGCTTGCTAACTGTAACCTGACGTTTATGCTCGAAAGTGTGGGTATCA<br/> AACAGGATTAGAAACCCCTAGTAGTCC</p>      |
| OTU725  | <p>GTGAGGAATATTGGTCAATGGACGAGAGTCTGAACCAGCCAAGTAGCGTGAAGGATGAAGGTCTACGG<br/> ATTGTAACTTCTTTTATAAGGGAATAAACCCCTCCCACGTGTGGGAGCTTGTATGTACCTTATGAATAAGC<br/> ATCGGCTAACTCCGTGCCAGCAGCCGCGGTAATACGGAGGATGCGAGCGTTATCCGGATTATTGGGTTT<br/> AAAGGGAGCGTAGGCGGTTGTTAAGTCAGTTGTGAAAGTTTGC GGCTCAACCGTAAAATTGCAGTTGA<br/> TACTGGCGACCTTGAGTGCAACAGAGGTAGGCGGAATTCGTGGTGTAGCGGTGAAATGCTTAGATATCAC<br/> GAAGAACTCCGATTGCGAAGGCAGCTTACTGGATTGTAACCTGACGCTGATGCTCGAAAGTGTGGGTATC<br/> AAACAGGATTAGATACCCTAGTAGTCC</p> |
| OTU753  | <p>GTGAGGAATATTGGTCAATGGGCGAGAGCCTGAACCAGCCAAGTAGCGTGAAGGATGACTGCCCTATGG<br/> GTTGTAACTTCTTTTATATGGAATAAAGTGCAGTATGTACTGTTTTGTATGTACCATACGAATAAGGA<br/> TCGGCTAACTCCGTGCCAGCAGCCGCGGTAATACGGAGGATCCGAGCGTTATCCGGATTATTGGGTTA<br/> AAGGGAGCGTAGGCGGATTATTAAGTCAGTTGTGAAAGTTTGC GGCTCAACCGTAAAATTGCAGTTGATA<br/> CTGGTAGTCTTGAGTGCAGCAGAGGTAGGCGGAATTCGTGGTGTAGCGGTGAAATGCTTAGATATCACGA<br/> AGAACTCCGATTGCGAAGGCAGCTTACTGGACTGTAACCTGACGCTGATGCTCGAAAGTGTGGGTATCAA<br/> ACAGGATTAGAAACCCCTAGTAGTCC</p>   |
| OTU227  | <p>GTGAGGAATATTGGTCAATGGGCGAGAGCCTGAACCAGCCAAGTAGCGTGAAGGATGAAGGTCTACGG<br/> ATTGTAACTTCTTTTATACGGGAATAAAGTATCCTACGTGTAGGATTTGTATGTACCGTATGAATAAGCA</p>                                                                                                                                                                                                                                                                                                                                                 |



|        |                                                                                                                                                                                                                                                                                                                                                                                                                                                                                    |
|--------|------------------------------------------------------------------------------------------------------------------------------------------------------------------------------------------------------------------------------------------------------------------------------------------------------------------------------------------------------------------------------------------------------------------------------------------------------------------------------------|
|        | TCGGCTAACTCCGTGCCAGCAGCCCGGTAATACGGAGGATGCGAGCGTTATCCGGATTATTGGGTTTA<br>AAGGGAGCGCAGACGGGAGATTAAGTCAGTTGTGAAAGTTTGGCGCTCAACCGTAAAAATTGCAGTTGAT<br>ACTGGGTGTCCTTGAGTACAGTAGAGGCAGCGGAATTCGTGGTGTAGCGGTGAAATGCTTAGATATCACG<br>AAGAACTCCGATTGCGAAGGCAGCTTGCTGGACTGTAAGTACGCTGATGCTCGAAAGTGTGGGTATCA<br>AACAGGATTAGAAACCTAGTAGTCC                                                                                                                                                      |
| OTU659 | GTGAGGAATATTGGTCAATGGGCGAGAGCCTGAACCAGCCAAGTAGCGTGAAGGATGACTGCCCTATGG<br>GTTGTAAACTTCTTTTATAAAGGAATAAAGTCGGGTATGGATACCCGTTTGCATGTACTTTATGAATAAGG<br>ATCGGCTAACTCCGTGCCAGCAGCCCGGTAATACGGAGGATCCGAGCGTTATCCGGATTATTGGGTTT<br>AAAGGGAGCGCAGACGGGTCGTTAAGTCAGCTGTGAAAGTTTGGGGCTCAACCTTAAAATTGCAGTTG<br>ATACTGGCGTCTTGAGTGCAGTTGAGGTGTGCGGAATTCGTGGTGTAGCGGTGAAATGCTTAGATATCA<br>CGAAGAACTCCGATTGCGAAGGCAGCACACTAATCCGTAAGTACGCTTATGCTCGAAAGTGTGGGTAT<br>CAAACAGGATTAGAAACCTAGTAGTCC   |
| OTU657 | GTGAGGAATATTGGTCAATGGGCGAGAGCCTGAACCAGCCAAGTAGCGTGAAGGATGACTGCCCTATGG<br>GTTGTAAACTTCTTTTATATGGGAATAAAGTTTCCACGTGTGAATTTTGTATGTACCATATGAATAAGGA<br>TCGGCTAACTCCGTGCCAGCAGCCCGGTAATACGGAGGATCCGAGCGTTATCCGGATTATTGGGTTTA<br>AAGGGAGCGCAGACGGGTCGTTAAGTCAGCTGTGAAAGTTTGGGGCTCAACCTTAAAATTGCAGTTGAT<br>ACTGGCGTCTTGAGTGCAGTTGAGGTGTGCGGAATTCGTGGTGTAGCGGTGAAATGCTTAGATATCACG<br>AAGAACTCCGATTGCGAAGGCAGCACACTAATCCGTAAGTACGCTTATGCTCGAAAGTGTGGGTATCA<br>AACAGGATTAGAAACCTAGTAGTCC     |
| OTU31  | GTGAGGAATATTGGTCAATGGACGAGAGTCTGAACCAGCCAAGTAGCGTGAAGGATGACTGCCCTATGG<br>GTTGTAAACTTCTTTTATACGGGAATAAAGTTAGCCACGTGTGGTTTTTGTATGTACCGTATGAATAAGG<br>ATCGGCTAACTCCGTGCCAGCAGCCCGGTAATACGGAGGATCCGAGCGTTATCCGGATTATTGGGTTT<br>AAAGGGAGCGTAGGCGGGTATTAAGTCAGTTGTGAAAGTTTGGCGCTCAACCGTAAAATTGCAGTTGA<br>TACTGGTATCCTTGAGTGCAGCAGAGGTGGCGGAATTCGTGGTGTAGCGGTGAAATGCTTAGATATCAC<br>GAAGAACTCCGATTGCGAAGGCAGCTACTGGAGTGAAGTACGCTGATGCTCGAAAGTGTGGGTATC<br>AAACAGGATTAGAAACCTAGTAGTCC       |
| OTU987 | GTGAGGAATATTGGTCAATGGGCGAGAGCCTGAACCAGCCAAGTAGCGTGAAGGATGAAGGTCTACGG<br>ATTGTAAACTTCTTTTATACGGGAATAAAGTTTCTACGTGTAGGATTTTGTATGTACCGTATGAATAAGCA<br>TCGGCTAACTCCGTGCCAGCAGCCCGGTAATACGGAGGATGCGAGCGTTATCCGGATTATTGGGTTTA<br>AAGGGAGCGCAGACGGGAGATTAAGTCAGTTGTGAAAGTTTGGCGCTCAACCGTAAAATTGCAGTTGAT<br>ACTGGTTTCTTGAGTGCAGTTGAGGCAGCGGAATTCGTGGTGTAGCGGTGAAATGCTTAGATATCACG<br>AAGAACCCCGATTGCGAAGGCAGCTTGCTAAACTGTAAGTACGCTTATGCTCGAAAGTGTGGGTATCA<br>AACAGGATTAGAAACCTAGTAGTCC      |
| OTU163 | GTGAGGAATATTGGTCAATGGGCGAGAGCCTGAACCAGCCAAGTAGCGTGAAGGATGACTGCCCTATGG<br>GTTGTAAACTTCTTTTATAAAGGAATAAAGTCGGGTATGGATACCCGTTTGCATGTACTTTATGAATAAGG<br>ATCGGCTAACTCCGTGCCAGCAGCCCGGTAATACGGAGGATCCGAGCGTTATCCGGATTATTGGGTTT<br>AAAGGGAGCGTAGATGGATGTTAAGTCAGTTGTGAAAGTTTGGCGCTCAACCGTAAAATTGCAGTTGA<br>TACTGGATATCCTTGAGTGCAGTTGAGGCAGCGGAATTCGTGGTGTAGCGGTGAAATGCTTAGATATCAC<br>GAAGAACTCCGATTGCGAAGGCAGCTGCTAAACTGTAAGTACGCTTATGAGGCTCGAAAGTGTGGGTATC<br>AAACAGGATTAGAAACCTAGTAGTCC |
| OTU512 | GTGAGGAATATTGGTCAATGGGCGAGAGCCTGAACCAGCCAAGTAGCGTGAAGGATGACTGCCCTATGG<br>GTTGTAAACTTCTTTTATAAAGGAATAAAGTCGGGTATGCATACCCGTTTGCATGTACTTTATGAATAAGG<br>ATCGGCTAACTCCGTGCCAGCAGCCCGGTAATACGGAGGATCCGAGCGTTATCCGGATTATTGGGTTT<br>AAAGGGAGCGTAGATGGATGTTAAGTCAGTTGTGAAAGTTTGGCGCTCAACCGTAAAATTGCAGTTGA                                                                                                                                                                                   |

|                         |         |                                                                                                                                                                                                                                                                                                                                                                                                                                                                                     |
|-------------------------|---------|-------------------------------------------------------------------------------------------------------------------------------------------------------------------------------------------------------------------------------------------------------------------------------------------------------------------------------------------------------------------------------------------------------------------------------------------------------------------------------------|
|                         |         | TACTGGATGTCTTGAGTGCAGTTGAGGCAGGCGGAATTCGTGGTGTAGCGGTGAAATGCTTAGATATCAC<br>GAAGAACTCCGATTGCGAAGGCAGCCTGCTAAGCTGCAACTGACATTGAGGCTCGAAAAGTGTGGGTATC<br>AAACAGGATTAGAAACCCTGTAGTCC                                                                                                                                                                                                                                                                                                      |
|                         | OTU942  | GTGAGGAATATTGGTCAATGGACGAGAGTCTGAACCAGCCAAGTAGCGTGAAGGATGACTGCCCTATGG<br>GTTGTAAACTTCTTTTATATGGGAATAAAGTGAGCCACGTGTGGCTTTTGTATGTACCATACGAATAAGG<br>ATCGGCTAACTCCGTGCCAGCAGCCGGTAATACGGAGGATCCGAGCGTTATCCGGATTATTTGGGTTT<br>AAAGGGAGCGTAGGCGGACTATTAAGTCAGCTGTGAAAGTTTGC GGCTCAACCGTAAAATTGCAGTTGA<br>TACTGGTCTCTTGAGTGCAGTAGAGGTAGGCGGAATTCGTGGTGTAGCGGTGAAATGCTTAGATATCAC<br>GAAGAACTCCGATTGCGAAGGCAGCTTACTGGACTGTAAGTACGCTGATGCTCGAAAAGTGTGGGTATC<br>AAACAGGATTAGAAACCCTGTAGTCC   |
|                         | OTU652  | GTGAGGAATATTGGTCAATGGGCAGAGCCTGAACCAGCCAAGTAGCGTGAAGGATGACTGCCCTATGG<br>GTTGTAAACTTCTTTTATAAGGAATAAAGTGACGACACGTGTGCTGTTTTGTATGTACTTTATGAATAAGG<br>ATCGGCTAACTCCGTGCCAGCAGCCGGTAATACGGAGGATCCGAGCGTTATCCGGATTATTTGGGTTT<br>AAAGGGAGCGTAGATGGATGTTAAGTCAGTTGTGAAAGTTTGC GGCTCAACCGTAAAATTGCAATTGAT<br>ACTGGATGCTTGAGTACAGTTGAGGTAGGCGGAATTCGTGGTGTAGCGGTGAAATGCTTAGATATCACG<br>AAGAACTCCGATTGCGAAGGCAGCTTACTAACTGCAACTGACATTGAGGCTCGAAAAGTGTGGGTATCA<br>AACAGGATTAGATACCCTGTAGTCC    |
|                         | OTU1249 | GTGAGGAATATTGGTCAATGGGCAGAGCCTGAACCAGCCAAGTAGCGTGAAGGATGAAGTCC TACGG<br>ATTGTAAACTTCTTTTATAAGGAATAAAGTCACGCTCCACGTGTGGAGCCTTGTATGTACCTTATGAATAAGC<br>ATCGGCTAACTCCGTGCCAGCAGCCGGTAATACGGAGGATCCGAGCGTTATCCGGATTATTTGGGTTT<br>AAAGGGAGCGCAGACGGGATGTTAAGTCAGCTGTGAAAGTTTGC GGCTCAACCGTAAAATTGCAATTG<br>ATACTGGCGTTCTTGAGTGCAGTTGAGGTGTGCGGAATTCGTGGTGTAGCGGTGAAATGCTTAGATATCA<br>CGAAGAACTCCGATTGCGAAGGCAGCTCACTAACTGTAAGTACGCTTATGCTCGAAAAGTGTGGGTAT<br>CAAACAGGATTAGATACCCAGTAGTCC |
| Lachnospirace<br>ae_unc | OTU688  | GTGGGAATATTGCACAATGGGGAAACCCTGATGCAGCAGCCCGCTGAGCGAAGAAGTATTTCCGGT<br>ATGTAAAGCTCTATCAGCAGGGAAGAAAATGACGGTACCTGACTAAGAAGCCCCGGCTAACTACGTGCC<br>AGCAGCCCGGTAATACGTAGGGGCAAGCGTTATCCGGATTTACTGGGTGTAAGGGAGCGTAGACGG<br>AATGGCAAGTCTGATGTGAAAGCCGGGGCTCAACCCGGGACTGCATTGAAACTGTCAATCTAGAGT<br>ACCGGAGGGGTAAGTGAATTCTAGTGTAGCGGTGAAATGCGTAGATATTAGGAGGAACCCAGTGGC<br>GAAGGCGGCTTACTGGACGTAAGTACGTTGAGGCTCGAAAAGCGTGGGAGCAAACAGGATTAGAAA<br>CCCTAGTAGTCC                                 |
|                         | OTU684  | GTGGGAATATTGCACAATGGGCAGAAAGCCTGATGCAGCAACGCCCGCTGAGTGAAGAAGTATCTCCGGT<br>ATGTAAAGCTCTATCAGCAGGGAAGAAAATGACGGTACCTGACTAAGAAGCCCCGGCTAACTACGTGCC<br>AGCAGCCCGGTAATACGTAGGGGCAAGCGTTATCCGGATTTACTGGGTGTAAGGGAGCGCAGACGG<br>CACTGCAAGTCTGAAGTGAAGCCCGGGCTCAACCCGGGACTGCTTTGAAACTGTAGAGCTAGAG<br>TGCTGGAGAGGCAAGCGGAATTCCTAGTGTAGCGGTGAAATGCGTAGATATTAGGAAGAACCAGTGG<br>CGAAGGCGGCTTCTGGACAGTAACTGACGTTGAGGCTCGAAAAGCGTGGGAGCAAACAGGATTAGAA<br>ACCCTAGTAGTCC                            |
|                         | OTU518  | GTGGGAATATTGCACAATGGGCAGAAAGCCTGATGCAGCAGCCCGCTGAGTGAAGAAGTATTTCCGGT<br>ATGTAAAGCTCTATCAGCAGGGAAGAAAATGACGGTACCTGACTAAGAAGCCCCGGCTAACTACGTGCC<br>AGCAGCCCGGTAATACGTAGGGGCAAGCGTTATCCGGATTTACTGGGTGTAAGGGAGCGTAGACGG<br>CGAAGCAAGTCTGAAGTGAAGCCAGGGCTCAACCCGGGACTGCTTTGAAACTGTGTTGCTAGAGT<br>GTCGGAGAGGTAAGTGAATTCTAGTGTAGCGGTGAAATGCGTAGATATTAGGAGGAACCCAGTGGC<br>GAAGGCGGCTTACTGGACGATAACTGACGTTGAGGCTCGAAAAGCGTGGGAGCAAACAGGATTAGAAA                                              |

|         |                                                                                                                                                                                                                                                                                                                                                                                                                                                                   |
|---------|-------------------------------------------------------------------------------------------------------------------------------------------------------------------------------------------------------------------------------------------------------------------------------------------------------------------------------------------------------------------------------------------------------------------------------------------------------------------|
|         | CCCTAGTAGTCC                                                                                                                                                                                                                                                                                                                                                                                                                                                      |
| OTU1100 | GTGGGAATATTGCACAATGGGGAAACCCTGATGCAGCGACGCCGCGTGAGTGAAGAAGTATTTCCGGT<br>ATGTAAAGCTCTATCAGCAGGGAAGAAAATGACGGTACCTGACTAAGAAGCCCCGGCTAACTACGTGCC<br>AGCAGCCGCGGTAATACGTAGGGGCAAGCGTTATCCGGATTTACTGGGTGTAAGGGAGCGTAGACGG<br>TAAAGCAAGTCTGAAGTAAAAGCCCCGGGCTCAACCCGGGACTGCTTTGAAAAGTGTAACTAGAGT<br>GCTGGAGAGGTAAGCGGAATTCCTAGTGTAGCGGTGAAATGCGTAGATATTAGGAGGAACACCAGTGGC<br>GAAGGCGGCTTACTGGACAGTAACTGACGTTGAGGCTCGAAAGCGTGGGGAGCAAACAGGATTAGAAA<br>CCCTAGTAGTCC       |
| OTU131  | GTGGGAATATTGCACAATGGGGAAACCCTGATGCAGCGACGCCGCGTGAGTGAAGAAGTATTTCCGGT<br>ATGTAAAGCTCTATCAGCAGGGAAGAAGAAAGACGGTACCTGACTAAGAAGCCCCGGCTAACTACGTGC<br>CAGCAGCCGCGGTAATACGTAGGGGCAAGCGTTATCCGGATTTACTGGGTGTAAGGGAGCGTAGACG<br>GCGAAGCAAGTCTGAAGTAAAAGCCCCGGGCTCAACCCGGGACTGCTTTGAAAAGTGTTTGCTAGA<br>GTGCTGGAGAGGTAAGTGAATTCCTAGTGTAGCGGTGAAATGCGTAGATATTAGGAGGAACACCAGTG<br>GCGAAGGCGGCTTACTGGACAGTAACTGACGTTGAGGCTCGAAAGCGTGGGGAGCAAACAGGATTAGA<br>AACCCGTGTAGTCC      |
| OTU13   | GTGGGAATATTGCACAATGGGCAGAAAGCCTGATGCAGCGACGCCGCGTGAAAGCAAGAAGTATTTCCGGT<br>ATGTAAAGTCTATCAGCAGGGAAGAAGAAATGACGGTACCTGACTAAGAAGCTCCGGCTAAATACGTG<br>CCAGCAGCCGCGGTAATACGTATGGAGCAAGCGTTATCCGGATTTACTGGGTGTAAGGGAGCGTAGGC<br>GGTCTTATAAGTCTGATGTGAAAGCCCCGGGCTCAACCCGGGACTGCATTGAAAAGTGTAGGACTAGA<br>GTGTCGGAGGGTAAGTGAATTCCTAGTGTAGCGGTGAAATGCGTAGATATTAGGAGGAACACCAGTG<br>GCGAAGGCGGCTTACTGGACGATTACTGACGCTGAGGCTCGAAAGCGTGGGGAGCAAACAGGATTAGA<br>AACCCGGTGTAGTCC |
| OTU1108 | GTGGGAATATTGCACAATGGGCAGAAAGCCTGATGCAGCGACGCCGCGTGAGTGAAGAAGTATTTCCGGT<br>ATGTAAAGCTCTATCAGCAGGGAAGAAAATGACGGTACCTGACTAAGAAGCCCCGGCTAACTACGTGCC<br>AGCAGCCGCGGTAATACGTAGGGGCAAGCGTTATCCGGATTTACTGGGTGTAAGGGAGCGTAGACGG<br>CGACGCAAGTCTGGAGTAAAAGCCCCGGGCCAACCCGGGACTGCTTTGAAAAGTGTGCTGCTGGAG<br>TGCAGGAGAGGTAAGTGAATTCCTAGTGTAGCGGTGAAATGCGTAGATATTAGGAGGAACACCAGTGG<br>CGAAGGCGGCTTACTGGACTGTAAGTACTGACGTTGAGGCTCGAAAGCGTGGGGAGCAAACAGGATTAGAA<br>ACCCTAGTAGTCC  |
| OTU632  | GTGGGAATATTGCACAATGGGCAGAAAGCCTGATGCAGCGACGCCGCGTGAGTGAAGAAGTATTTCCGGT<br>ATGTAAAGCTCTATCAGCAGGGAAGAAAATGACGGTACCTGACTAAGAAGCCCCGGCTAACTACGTGCC<br>AGCAGCCGCGGTAATACGTAGGGGCAAGCGTTATCCGGATTTACTGGGTGTAAGGGAGCGTAGACGG<br>TAAAGCAAGTCTGAAGTAAAAGCCCCGGGCTCAACTGCGGGACTGCTTTGAAAAGTGTAACTGGAGT<br>GTCGGAGAGGTAAGTGAATTCCTAGTGTAGCGGTGAAATGCGTAGATATTAGGAGGAACACCAGTGGC<br>GAAGGCGACTTACTGGACGATAACTGACGTTGAGGCTCGAAAGCGTGGGGAGCAAACAGGATTAGAAA<br>CCCTAGTAGTCC     |
| OTU604  | GTGGGAATATTGCACAATGGGGAAACCCTGATGCAGCGACGCCGCGTGAGTGAAGAAGTATTTCCGGT<br>ATGTAAAGCTCTATCAGCAGGGAAGAGAAATGACGGTACCTGACTAAGAAGCCCCGGCTAACTACGTGCC<br>AGCAGCCGCGGTAATACGTAGGGGCAAGCGTTATCCGGATTTACTGGGTGTAAGGGAGCGTAGACGG<br>CTTAGCAAGTCTGAAGTAAAAGCCCCGGGCTCAACCCGGGACTGCTTTGAAAAGTGTAAAGTGGAGT<br>GCTGGAGAGGTAAGCGGAATTCCTAGTGTAGCGGTGAAATGCGTAGATATTAGGAGGAACACCAGTGGC<br>GAAGGCGGCTTACTGGACAGTAACTGACGTTGAGGCTCGAAAGCGTGGGGAGCAAACAGGATTAGATA<br>CCCTAGTAGTCC     |
| OTU258  | GTGGGAATATTGCACAATGGGGAAACCCTGATGCAGCGACGCCGCGTGAGTGAAGAAGTATTTCCGGT                                                                                                                                                                                                                                                                                                                                                                                              |

|         |                                                                                                                                                                                                                                                                                                                                                                                                                                                                                 |
|---------|---------------------------------------------------------------------------------------------------------------------------------------------------------------------------------------------------------------------------------------------------------------------------------------------------------------------------------------------------------------------------------------------------------------------------------------------------------------------------------|
|         | <p>ATGTAAAGCTCTATCAGCAGGGAAGAAAATGACGGTACCTGACTAAGAAGCCCCGGCTAACTACGTGCC<br/> AGCAGCCCGGTAATACGTAGGGGCAAGCGTTATCCGGATTTACTGGGTGTAAGGGAGCGTAGACGG<br/> CGGAGCAAGTCTGAAGTAAAAGCCCGGGCTCAACCCCGGGACTGCTTTGGAACTGTTCTGCTAGAG<br/> TGCTGGAGAGGTAAGTGAATTCCTAGTGTAGCGGTGAAATGCGTAGATATTAGGAGGAACACCAGTGG<br/> CGAAGGCGGCTTACTGGACAGTAACTGACGTTGAGGCTCGAAAGCGTGGGGAGCAAACAGGATTAGAT<br/> ACCCTAGTAGTCC</p>                                                                             |
| OTU553  | <p>GTGGGAATATTGCACAATGGGGAAACCCTGATGCAGCGACGCCGCTGAGCGAAGAAGTATTTCCGGT<br/> ATGTAAAGCTCTATCAGCAGGGAAGATAATGACGGTACCTGACTAAGAAGTCCCGGCTAAATACGTGCCA<br/> GCAGCCCGGTAATACGTATGGAGCAAGCGTTATCCGGATTTACTGGGTGTAAGGGAGCGTAGACGGTT<br/> GTGCAAGTCTGATGTGAAATCCAGGGCTTAAACCCTGGACCTGCATTGGAACTGTATACTAGAGTGT<br/> GGAGAGGTGAGTGAATTCCTAGTGTAGCGGTGAAATGCGTAGATATTAGGAGGAACACCAGTGGCGAA<br/> GGCGGCTCACTGGACGATAACTGACGTTGAGGCTCGAAAGCGTGGGGAGCAAACAGGATTAGAAACCC<br/> TAGTAGTCC</p>    |
| OTU503  | <p>GTGGGGATATTGCACAATGGAGGAACTCTGATGCAGCGACGCCGCTGAGTGAAGAAGTATTTCCGGT<br/> ATGTAAAGCTCTATCAGCAGGGAAGAAAATGACGGTACCTGACTAAGAAGCCCCGGCTAACTACGTGCC<br/> AGCAGCCCGGTAATACGTAGGGGCAAGCGTTATCCGGATTTACTGGGTGTAAGGGAGCGTAGACGG<br/> CGACGCAAGTCTGAAGTAAAATACCCGGGCTCAACCTGGGAACTGCTTTGGAACTGTGTTGCTAGAGT<br/> GCTGGAGAGGTAAGCGGAATTCCTAGTGTAGCGGTGAAATGCGTAGATATTAGGAAGAACACCAGTGGC<br/> GAAGGCGGCTTACTGGACAGTAACTGACGTTGAGGCTCGAAAGCGTGGGGAGCAAACAGGATTAGAAA<br/> CCCTAGTAGTCC</p>  |
| OTU952  | <p>GTGGGAATATTGCACAATGGGCAGAAAGCCTGATGCAGCGACGCCGCTGAGTGAAGAAGTATTTCCGGT<br/> ATGTAAAGCTCTATCAGCAGGGAAGAAAATGACGGTACCTGACTAAGAAGCCCCGGCTAACTACGTGCC<br/> AGCAGCCCGGTAATACGTAGGGGCAAGCGTTATCCGGATTTACTGGGTGTAAGGGAGCGCAGACGG<br/> CGATGCAAGTCTGGAGTGAAGCCCGGGGCTCAACCCCGGGACTGCTTTGGAACTGTATGGCTAGAGT<br/> GCTGGAGAGGCAAGCGGAATTCCTAGTGTAGCGGTGAAATGCGTAGATATTAGGAAGAACACCAGTGGC<br/> GAAGGCGGCTTACTGGACAGTAACTGACGTTGAGGCTCGAAAGCGTGGGGAGCAAACAGGATTAGAAA<br/> CCCTAGTAGTCC</p> |
| OTU1154 | <p>GTGGGAATATTGCACAATGGGGAAACCCTGATGCAGCGACGCCGCTGAAGGAAGAAGTATTTCCGGT<br/> ATGTAAACTTCTATCAGCAGGGAAGATAAGTACGGTACCTGACTAAGAAGCCCCGGCTAACTACGTGCC<br/> AGCAGCCCGGTAATACGTAGGGGCAAGCGTTATCCGGATTTACTGGGTGTAAGGGAGCGCAGGCGG<br/> AAGGCTAAGTCTGATGTGAAAGCCCGGGGCTCAACCCCGGACTGCATTGGAACTGGTTCATAGAGT<br/> GTCGGAGGGGTAAGTGAATTCCTAGTGTAGCGGTGAAATGCGTAGATATTAGGAGGAACACCAGTGGC<br/> GAAGGCGGCTTACTGGACGATAACTGACGCTGAGGCTCGAAAGCGTGGGGAGCAAACAGGATTAGATA<br/> CCCTAGTAGTCC</p>     |
| OTU609  | <p>GTGGGAATATTGCACAATGGGGAAACCCTGATGCAGCAACGCCGCTGAGTGAAGAAGTATTTCCGGT<br/> ATGTAAAGCTCTATCAGCAGGAAAGAAAATGACGGTACCTGACTAAGAAGCCCCGGCTAACTACGTGCC<br/> AGCAGCCCGGTAATACGTAGGGGCAAGCGTTATCCGGATTTACTGGGTGTAAGGGAGCGTAGACGG<br/> TTTTGCAAGTCTGAAGTGAAGCCCGGGGCTTAAACCCCGGACTGCTTTGGAACTGTAGAACTAGAGT<br/> GCAGGAGAGGTAAGTGAATTCCTAGTGTAGCGGTGAAATGCGTAGATATTAGGAGGAACACCAGTGGC<br/> GAAGGCGGCTTACTGGACTGTAAGTACGTTGAGGCTCGAAAGCGTGGGGAGCAAACAGGATTAGAAA<br/> CCCTAGTAGTCC</p>     |
| OTU68   | <p>GTGGGAATATTGACAATGGGCGAAAGCCTGATCCAGCGACGCCGCTGAGTGAAGAAGTATTTCCGGT<br/> ATGTAAAGCTCTATCAGCAGGGAAGAAAATGACGGTACCTGACTAAGAAGCCCCGGCTAACTACGTGCC<br/> AGCAGCCCGGTAATACGTAGGGGCAAGCGTTATCCGGATTTACTGGGTGTAAGGGAGCGTAGACGG</p>                                                                                                                                                                                                                                                   |

|        |                                                                                                                                                                                                                                                                                                                                                                                                                                                           |
|--------|-----------------------------------------------------------------------------------------------------------------------------------------------------------------------------------------------------------------------------------------------------------------------------------------------------------------------------------------------------------------------------------------------------------------------------------------------------------|
|        | TTAAGCAAGTCTGAAGTGAAAACCCGGGGCTCAACCCCGTACTGCTTTGGAACTGTTTGACTTGAGT<br>GCAGGAGAGGTAAGTGAATTCTAGTGTAGCGGTGAAATGCGTAGATATTAGGAGGAACACCAGTGGC<br>GAAGGCGGCTTACTGGACTGTAACGTGACGTTGAGGCTCGAAAGCGTGGGGAGCAAACAGGATTAGAAA<br>CCCTAGTAGTCC                                                                                                                                                                                                                       |
| OTU406 | GTGGGAATATTGCACAATGGGGAAACCCTGATGCAGCGACGCCGCGTGAGCGAAGAAGTATTCGGT<br>ATGTAAAGCTCTATCAGCAGGGAAGATAATGACGGTACCTGACTAAGAAGCTCCGGCTAAATACGTGCCA<br>GCAGCCGCGGTAATACGTATGGAGCAAGCGTTATCCGGATTACTGGGTGTAAGGGAGCGTAGACGGC<br>AGGGCAAGTCTGATGTGAAAACCCGGGGCTCAACCCCGGACTGCATTGGAACTGTCGGCTGGAGT<br>GCAGGAGAGGTAAGTGAATTCTAGTGTAGCGGTGAAATGCGTAGATATTAGGAGGAACACCAGTGGC<br>GAAGGCGGCTTACTGGACTGTAACGTGACGTTGAGGCTCGAAAGCGTGGGGAGCAAACAGGATTAGAAA<br>CCCTAGTAGTCC  |
| OTU861 | GTGGGAATATTGCACAATGGGGAAACCCTGATGCAGCGACGCCGCGTGAGCGAAGAAGTATTCGGT<br>ATGTAAAGCTCTATCAGCAGGGAAGAAGAATGACGGTACCTGACTAAGAAGCTCCGGCTAAATACGTGC<br>CAGCAGCCGCGTAATACGTATGGAGCAAGCGTTATCCGGATTACTGGGTGTAAGGGAGTGTAGCGG<br>GCATGGCAAGTCTGATGTGAAAACCCGGGGCTTAACCCCGGACTGCATTGGAACTGTCAGGCTGGAG<br>TGTCGGAGAGGTAAGTGAATTCTAGTGTAGCGGTGAAATGCGTAGATATTAGGAGGAACACCAGTGG<br>CGAAGGCGGCTTACTGGACGACAACGTGACGCTGAGGCTCGAAAGCGTGGGGAGCAAACAGGATTAGAA<br>ACCCTAGTAGTCC |
| OTU230 | GTGGGGATATTGCACAATGGGGAAACCCTGATGCAGCGACGCCGCGTGAGTGAAGAAGTATTCGGT<br>ATGTAAAGCTCTATCAGCAGGGAAGAACTGACGGTACCTGACTAAGAAGCCCGGCTAACTACGTGCC<br>AGCAGCCGCGTAATACGTAGGGGCAAGCGTTATCCGGATTACTGGGTGTAAGGGAGCGTAGACGG<br>TATTGCAAGTCTGAAGTGAATCCCGGGCTCAACCCCGGAGCTGCTTTGGAACTGTAAACTAGAGT<br>GCTGGAGAGGTAAGCGGAATTCTAGTGTAGCGGTGAAATGCGTAGATATTAGGAGGAACACCAGTGGC<br>GAAGGCGGCTTACTGGACAGTCACTGACGTTGAGGCTCGAAAGCGTGGGGAGCAAACAGGATTAGATA<br>CCCTAGTAGTCC       |
| OTU111 | GTGGGGATATTGCACAATGGAGGAACTCTGATGCAGCGACGCCGCGTGAGTGAAGAAGTATTCGGT<br>ATGTAAAGCTCTATCAGCAGGGAAGAAAATGACGGTACCTGACTAAGAAGCCCGGCTAACTACGTGCC<br>AGCAGCCGCGTAATACGTAGGGGCAAGCGTTATCCGGATTACTGGGTGTAAGGGAGCGTAGACGG<br>CGATGCAAGTCTGAAGTGAATACCCGGGCTCAACCTGGGAACTGCTTTGGAACTGTATGGCTAGAGT<br>GCTGGAGAGGTAAGCGGAATTCTAGTGTAGCGGTGAAATGCGTAGATATTAGGAAGAACACCAGTGGC<br>GAAGGCGGCTTACTGGACAGTAACTGACGTTGAGGCTCGAAAGCGTGGGGAGCAAACAGGATTAGATA<br>CCCTAGTAGTCC    |
| OTU119 | GTGGGAATATTGCACAATGGGGAAACCCTGATGCAGCAACGCCGCGTGAAGGATGACGTTTTTCGGA<br>TTGTAAACTTCTTTCTTAGTGACGAAGACAGTGACGGTAGCTAAGGAATAAGCATCGGCTAACTACGTG<br>CCAGCAGCCGCGTAATACGTAGGATGCAAGCGTTATCCGGATTACTGGGTGTAAGGGAGCGCAGGC<br>GGTGCGGCAAGTCTGATGTGAAAACCCGGGGCTCAACCCCGTACTGCATTGGAACTGTCGTAAGTA<br>GTGTCGGAGGGTAAGCGGAATTCTAGTGTAGCGGTGAAATGCGTAGATATTAGGAGGAACACCAGTG<br>GCCAAGGCGGCTTACTGGACGATAACTGACGCTGAGGCTCGAAAGCGTGGGGAGCAAACAGGATTAGA<br>TACCCTAGTAGTCC |
| OTU974 | GTGGGAATATTGCACAATGGGGAAACCCTGATGCAGCGACGCCGCGTGAGCGAAGAAGTATTCGGT<br>ATGTAAAGCTCTATCAGCAGGGAAGAAAATGACGGTACCTGACTAAGAAGCCCGGCTAACTACGTGCC<br>AGCAGCCGCGTAATACGTAGGGGCAAGCGTTATCCGGATTACTGGGTGTAAGGGAGCGTAGACGG<br>CGAGGCAAGTCTGATGTGAAAACCCGGGGCTCAACCCCGTACTGCATTGGAACTGTTTTGCTTGAAGT<br>GCCGGAGAGGTAAGCGGAATTCTAGTGTAGCGGTGAAATGCGTAGATATTAGGAGGAACACCAGTGGC                                                                                           |

|        |                                                                                                                                                                                                                                                                                                                                                                                                                                                                 |
|--------|-----------------------------------------------------------------------------------------------------------------------------------------------------------------------------------------------------------------------------------------------------------------------------------------------------------------------------------------------------------------------------------------------------------------------------------------------------------------|
|        | GAAGGCGGCTTACTGGACGGCAACTGACGTTGAGGCTCGAAAGCGTGGGGAGCAAACAGGATTAGAAA<br>CCCTAGTAGTCC                                                                                                                                                                                                                                                                                                                                                                            |
| OTU243 | GTGGGAATATTGCACAATGGGGAAACCCTGATGCAGCAGCGCGGTGAGCGATGAAGTATTCGGT<br>ATGTAAAGCTCTATCAGCAGGGAAGATAATGACGGTACCTGACTAAGAAGCTCCGGCTAAATACGTGCCA<br>GCAGCCGCGTAATACGTATGGAGCAAGCGTTATCCGGATTTACTGGGTGTAAGGGAGCGTAGGCGGTC<br>CTGCAAGTCTGATGTGAAAGGCCGGGCTCAACCCCGGACTGCATTGGAACTGTAGGACTAGAGTGT<br>CGGAGGGGTAAGTGAATTCCTAGTGTAGCGGTGAAATGCGTAGATATTAGGAGGAACACCAGTGGCGA<br>AGGCGGCTTACTGGACGACTACTGACGCTGAGGCTCGAAAGCGTGGGGAGCAAACAGGATTAGAAAAC<br>CTAGTAGTCC          |
| OTU481 | GTGGGAATATTGCACAATGGGGAAACCCTGATGCAGCAACGCCGCGTGAGTGAAGAAGTATTCGGT<br>ATGTAAAGCTCTATCAGCAGGGAAGAAAATGACGGTACCTGACTAAGAAGCCCGGCTAACTACGTGCC<br>AGCAGCCGCGTAATACGTAGGGGCAAGCGTTATCCGGATTTACTGGGTGTAAGGGAGCGTAGACGG<br>CAGCGCAAGTCTGAAGTAAAAGCCCGGGCTCAACCCCGGAATGGCTTTGGAACTGTGCAGCTAGAG<br>TACCGAGGGGTAAGCGGAATTCCTAGTGTAGCGGTGAAATGCGTAGATATTAGGAGGAACACCAGTGG<br>CGAAGGCGGCTTACTGGACGGTAAGTACTGACGTTGAGGCTCGAAAGCGTGGGGAGCAAACAGGATTAGAA<br>ACCCTAGTAGTCC      |
| OTU485 | GTGGGAATATTGCACAATGGGGAAACCCTGATGCAGCAGCGCGGTGATTGAAGAAGTATTCGGT<br>ATGTAAAGATCTATCAGCAAGGAAGAAAATGACGGTACTTGACTAAGAAGCCCGGCTAACTACGTGCC<br>AGCAGCCGCGTAATACGTAGGGGCAAGCGTTATCCGGATTTACTGGGTGTAAGGGAGCGTAGGCGG<br>TCTGGCAAGCCAGAAGTAAAAGCCCGGGCTTAACCCCGGACTGCTTTTGGAACTGTAGACTAGAGT<br>GTCGGAGAGGTAAGTGAATTCCTAGTGTAGCGGTGAAATGCGTAGATATTAGGAGGAACACCAGTGGC<br>GAAGGCGGCTTACTGGACGATAACTGACGCTGAGGCTCGAAAGCGTGGGGAGCAAACAGGATTAGAAA<br>CCCTAGTAGTCC            |
| OTU698 | GTGGGAATATTGCACAATGGGGAAACCCTGATGCAGCAGCGCGGTGAGTGAAGAAGTATTCGGT<br>ATGTAAAGCTCTATCAGCAGGGAAGAAGAAAATGACGGTACCTGACTAAGAAGCCCGGCTAACTACGTG<br>CCAGCAGCCGCGTAATACGTAGGGGCAAGCGTTATCCGGATTTACTGGGTGTAAGGGAGCGTAGAC<br>GGTGAAGCAAGTCTGAAGTAAAAGTTGGGGCTCAACCCGAAAAGTCTTTGGAACTGTTAACTGG<br>AGTACAGGAGAGGTAAGTGAATTCCTAGTGTAGCGGTGAAATGCGTAGATATTAGGAGGAACACCAGT<br>GGCGAAGGCGGCTTACTGGACTGTAAGTACTGACGTTGAGGCTCGAAAGCGTGGGGAGCAAACAGGATTAG<br>AAACCCTAGTAGTCC       |
| OTU296 | GTGGGAATATTGCACAATGGGGAAACCCTGATGCAGCAACGCCGCGTGAAGGAAGAAGTATTCGGT<br>ATGTAAACTTCTATCGACAGGGAAGAAACAAATGACGGTACCTGAATAAGAAGCACCAGGCTAAATACGT<br>GCCAGCAGCCGCGTAATACGTATGGTGAAGCGTTATCCGGATTTACTGGGTGTAAGGGTGAAGTAGGC<br>GGTCATGCAAGTCATATGTGAAATGTCAGGGCTTAACCTTGGCGCTGCATAAGAACTGTATGACTAGAG<br>TGCAGGAGAGGTAAGCGGAATTCCTAGTGTAGCGGTGAAATGCGTAGATATTAGGAAGAACACCAGTGG<br>CGAAGGCGGCTTACTGGACTGTTACTGACGCTGAGTCACGAAAGCGTGGGGAGCAAACAGGATTAGAA<br>ACCCTAGTAGTCC |
| OTU580 | GTGGGAATATTGCACAATGGGGAAACCCTGATGCAGCAACGCCGCGTGAGTGAAGAAGTATTCGGT<br>ATGTAAAGCTCTATCAGCAGGGAAGAAAGTACGGTACCTGACTAAGAAGCCCGGCTAACTACGTGCC<br>AGCAGCCGCGTAATACGTAGGGGCAAGCGTTATCCGGATTTACTGGGTGTAAGGGAGCGTAGACGG<br>CACAGCAAGTCTGAAGTAAAATCCCGGGCTCAACCCGGAACTGCTTTGGAACTGTTGGGCTGGAG<br>TGCTGGAGAGGCAAGCGGAATTCCTAGTGTAGCGGTGAAATGCGTAGATATTAGGAGGAACACCAGTGG<br>CGAAGGCGGCTTCTGGACAGTAAGTACTGACGTTGAGGCTCGAAAGCGTGGGGAGCAAACAGGATTAGAA<br>ACCCTAGTAGTCC        |

|        |                                                                                                                                                                                                                                                                                                                                                                                                                                                                               |
|--------|-------------------------------------------------------------------------------------------------------------------------------------------------------------------------------------------------------------------------------------------------------------------------------------------------------------------------------------------------------------------------------------------------------------------------------------------------------------------------------|
| OTU220 | <p>GTGGGGAATATTGCACAATGGGGGAAACCCTGATGCAGCGACGCCGCGTGAGTGAAGAAGTATTTCCGGT<br/> ATGTAAAGCTCTATCAGCAGGGAAGAAAATGACGGTACCTGACTAAGAAGCCCCGGCTAACTACGTGCC<br/> AGCAGCCCGGTAATACGTAGGGGCAAGCGTTATCCGGATTTACTGGGTGTAAGGGAGCGTAGACGG<br/> TAAAGCAAGTCTGAAGTGAAGCCCGGGCTCAACTGCGGGACTGCTTTGGAACTGTTAACTGGAGT<br/> GTCGGAGAGGTAAGTGAATTCTAGTGTAGCGGTGAAATGCGTAGATATTAGGAGGAACACCAGTGGC<br/> GAAGGCGACTTACTGGACGATAACTGACGTTGAGGCTCGAAAGCGTGGGGAGCAAACAGGATTAGATA<br/> CCCTAGTAGTCC</p>  |
| OTU342 | <p>GTGGGGAATATTGCACAATGGGGGAAACCCTGATGCAGCAACGCCGCGTGAGTGAAGAAGTATTTCCGGT<br/> ATGTAAAGCTCTATCAGCAGGGAAGAAAATGACGGTACCTGACTAAGAAGCCCCGGCTAACTACGTGCC<br/> AGCAGCCCGGTAATACGTAGGGGCAAGCGTTATCCGGATTTACTGGGTGTAAGGGAGCGTAGACGG<br/> CAGCGCAAGTCTGAAGTGAAGCCCGGGCTCAACTCCGGAATGGCTTTGGAACTGTGCAGCTAGAG<br/> TACCGGAGGGTAAGCGGAATTCCTAGTGTAGCGGTGAAATGCGTAGATATTAGGAGGAACACCAGTGG<br/> CGAAGGCAGCTTACTGGACGTAACTGACGTTGAGGCTCGAAAGCGTGGGGAGCAAACAGGATTAGAA<br/> ACCCTAGTAGTCC</p> |
| OTU612 | <p>GTGGGGATATTGCACAATGGGGGAAACCCTGATGCAGCGACGCCGCGTGGAGGAAGAAGTTTTCCGG<br/> ATTGTAAACTCTGTCGTTAGGGACGATAATGACGGTACCTAACAAAGAAAGCACCCGGCTAAATACGTGCC<br/> AGCAGCCCGGTAATACGTATGGTCAAGCGTTATCCGGATTTACTGGGTGTAAGGGAGCGCAGGCGG<br/> AAGGCTAAGTCTGATGTGAAAGCCCGGGCTCAACCCCGTACTGCATTGGAACTGGTCATCTAGAGT<br/> GTCGGAGGGTAAGTGAATTCTAGTGTAGCGGTGAAATGCGTAGATATTAGGAGGAACACCAGTGGC<br/> GAAGGCGGCTTACTGGACGATAACTGACGCTGAGGCTCGAAAGCGTGGGGAGCAAACAGGATTAGAAA<br/> CCCTAGTAGTCC</p>   |
| OTU614 | <p>GTGGGGAATATTGCACAATGGGGGAAACCCTGATGCAGCGACGCCGCGTGAGTGAAGAAGTATTTCCGGT<br/> ATGTAAAGCTCTATCAGCAGGAAAGAAAATGACGGTACCTGACTAAGAAGCCCCGGCTAACTACGTGCC<br/> AGCAGCCCGGTAATACGTAGGGGCAAGCGTTATCCGGATTTACTGGGTGTAAGGGAGCGTAGACGG<br/> TATGGCAAGTCTGAAGTGAAGCCCGCAGCTTAACTGTGGGACTGCTTTGGAACTGTAACTAGAGT<br/> GCAGGAGAGGTAAGTGAATTCTAGTGTAGCGGTGAAATGCGTAGATATTAGGAGGAACACCAGTGGC<br/> GAAGGCGGCTTACTGGACTGTAAGTACGTTGAGGCTCGAAAGCGTGGGGAGCAAACAGGATTAGAAA<br/> CCCTAGTAGTCC</p>   |
| OTU538 | <p>GTGGGGAATATTGCACAATGGGCGAAAGCCTGATGCAGCGACGCCGCGTGAGTGAAGAAGTATTTCCGGT<br/> ATGTAAAGCTCTATCAGCAGGGAAGATAATGACGGTACCTGACTAAGAAGCCCCGGCTAACTACGTGCC<br/> AGCAGCCCGGTAATACGTAGGGGCAAGCGTTATCCGGATTTACTGGGTGTAAGGGAGCGTAGACGG<br/> CATGGCAAGTCTGAAGTGAAGCCCGGGCTCAACCCCTGGGACTGCTTTGGAACTGTCAAGCTAGAG<br/> TGCAGGAGAGGTAAGTGAATTCTAGTGTAGCGGTGAAATGCGTAGATATTAGGAGGAACACCAGTGG<br/> CGAAGGCGGCTTACTGGACTGTAAGTACGTTGAGGCTCGAAAGCGTGGGGAGCAAACAGGATTAGAA<br/> ACCCCTGTAGTCC</p> |
| OTU536 | <p>GTGGGGAATATTGCACAATGGGGGAAACCCTGATGCAGCAACGCCGCGTGAGTGAAGAAGTATTTCCGGT<br/> ATGTAAAGCTCTATCAGCAGGGAAGAAAATGACGGTACCTGACTAAGAAGCCCCGGCTAACTACGTGCC<br/> AGCAGCCCGGTAATACGTAGGGGCAAGCGTTATCCGGATTTACTGGGTGTAAGGGAGCGTAGACGG<br/> CGAGACAAGTCTGAAGTGAAGCCCGGGCTCAACCCCGGGACTGCTTTGGAACTGCCTTGCTAGAG<br/> TGCTGGAGAGGTAAGTGAATTCTAGTGTAGCGGTGAAATGCGTAGATATTAGGAGGAACACCAGTGG<br/> CGAAGGCGGCTTACTGGACAGTAACTGACGTTGAGGCTCGAAAGCGTGGGGAGCAAACAGGATTAGAA<br/> ACCCTAGTAGTCC</p> |
| OTU763 | <p>GTGGGGAATATTGCACAATGGGCGAAAGCCTGATGCAGCGACGCCGCGTGAGCGAAGAAGTATTTCCGGT<br/> ATGTAAAGCTCTATCAGCAGGGAAGATAATGACGGTACCTGACTAAGAAGCACCCGGCTAAATACGTGCC</p>                                                                                                                                                                                                                                                                                                                     |

|         |                                                                                                                                                                                                                                                                                                                                                                                                                                                                                                           |
|---------|-----------------------------------------------------------------------------------------------------------------------------------------------------------------------------------------------------------------------------------------------------------------------------------------------------------------------------------------------------------------------------------------------------------------------------------------------------------------------------------------------------------|
|         | <p>AGCAGCCGCGGTAATACGTATGGTGCAAGCGTTATCCGGATTACTGGGTGTAAGGGAGCGCAGGCGG<br/> TGCGCAAGTCTGATGTGAAAGCCCGGGGCTCAACCCCGGACTGCTTTGGAACTGTAGAGCTAGAGT<br/> GCTGGAGAGGCAAGCGGAATTCTAGTGTAGCGGTGAAATGCGTAGATATTAGGAAGAACCAGTGGC<br/> GAAGGCGGCTTGCTGGACAGTAACTGACGTTTCAGGCTCGAAAGCGTGGGGAGCAAACAGGATTAGAAA<br/> CCCTAGTAGTCC</p>                                                                                                                                                                                   |
| OTU653  | <p>GTGGGAATATTGCGCAATGGGCAGAAAGCCTGACGCAGCGACCCGCGTGAGGGATGAAGTTCTCGG<br/> ATCGTAAACCTCTGTCAGGGGGGAAGAAACCCCTCGTGTGAATAATGCGAGGGCTTGACGGTACCCCC<br/> AAAGGAAGCACCAGGCTAACTCCGTGCCAGCAGCGCGTAATACGTATGGTCAAGCGTTATCCGGATT<br/> ACTGGGTGTAAGGGAGCGCAAGCGGTGCGGCAAGTCTGATGTGAAAGCCCGGGGCTCAACCCCGGTA<br/> CTGCATTGAAACTGTCGTAAGTGTAGAGTGTGCGGAGGGTAAGCGGAATTCCTAGTGTAGCGGTGAAATGC<br/> GTAGATATTAGGAGGAACACCAGTGGCGAAGGCGGCTTACTGGACGATAACTGACGCTGAGGCTCGAAA<br/> GCGTGGGGAGCAAACAGGATTAGAAACCCCTGTAGTCC</p> |
| OTU1124 | <p>GTGGGAATATTGACAATGGGCAGAAAGCCTGATGCAGCGACCCGCGTGAGCGATGAAGTATTCGGT<br/> ATGTAAAGCTCTATCAGCAGGGAAGAAAATGACGGTACCTGACTAAGAAGCCCGGCTAACTACGTGCC<br/> AGCAGCCGCGGTAATACGTAGGGGCAAGCGTTATCCGGATTACTGGGTGTAAGGGAGCGTAGACGG<br/> AAGTCAAGTCAGAAGTGAAGCCCGGGGCTTAAACCCCGGACTGCTTTTGAAACTGTGACTAGAGT<br/> GCAGGAGAGGTAAGCGGAATTCCTAGTGTAGCGGTGAAATGCGTAGATATTAGGAGGAACACCAGTGGC<br/> GAAGGCGGCTTACTGGACTGTAAGTACGTTGAGGCTCGAAAGCGTGGGGAGCAAACAGGATTAGAAA<br/> CCCTGTAGTCC</p>                                   |
| OTU369  | <p>GTGGGAATATTGCACAATGGGGAAACCCCTGATGCAGCGACCCGCGTGAGTGATGAAGTATTCGGT<br/> ATGTAAAGCTCTATCAGCAGGGAAGATAATGACGGTACCTGACTAAGAAGCACCAGGCTAAATACGTGCC<br/> AGCAGCCGCGGTAATACGTATGGTGCAAGCGTTATCCGGATTACTGGGTGTAAGGGTGCAGGTGGC<br/> AAGGCAAGTCTGAAGTGAATCCGGGGCTCAACCCCGGACTGCTTTGAAACTGTCGTAAGTGTAGAGT<br/> TCGGAGGGGTAAGCGGAATTCCTAGTGTAGCGGTGAAATGCGTAGATATTAGGAGGAACACCAGTGGC<br/> AAGGCGGCTTACTGGACGATAACTGACGCTGAGGCTCGAAAGCGTGGGGAGCAAACAGGATTAGAAAC<br/> CCTAGTAGTCC</p>                               |
| OTU504  | <p>GTGGGAATATTGCACAATGGGCAGAAAGCCTGATGCAGCGACCCGCGTGAGGATGAAGTATTCGGT<br/> ATGTAAACTTCTATCAGCAGGGAAGAAAATGACGGTACCTGACTAAGAAGCCCGGCTAACTACGTGCC<br/> AGCAGCCGCGGTAATACGTAGGGGCAAGCGTTATCCGGATTACTGGGTGTAAGGGAGCGTAGATGG<br/> CATGGCAAGTCTGAAGTGAAGCCCGGGGCTTAAACCCCGGACTGCTTTGAAACTGTTAAGCTAGAGT<br/> GCAGGAGAGGTAAGCGGAATTCCTAGTGTAGCGGTGAAATGCGTAGATATTAGGAGGAACACCAGTGGC<br/> GAAGGCGGCTTACTGGACTGTAAGTACGTTGAGGCTCGAAAGCGTGGGGAGCAAACAGGATTAGAAA<br/> CCCTAGTAGTCC</p>                                |
| OTU1297 | <p>GTGGGAATATTGCACAATGGGGAAACCCCTGATGCAGCGACCCGCGTGAGTGAAGAAGTATTCGGT<br/> ATGTAAAGCTCTATCAGCAGGGAAGAAAATGACGGTACCTGACTAAGAAGCCCGGCTAACTACGTGCC<br/> AGCAGCCGCGGTAATACGTAGGGGCAAGCGTTATCCGGATTACTGGGTGTAAGGGAGCGTAGACGG<br/> TCAAGCAAGTCTGAAGTGAAGGCTGGGGCTCAACCCCGGACTGCTTTTGAAACTGTTGACTGGAG<br/> TGCTGGAGAGGTAAGCGGAATTCCTAGTGTAGCGGTGAAATGCGTAGATATTAGGAGGAACACCAGTGG<br/> CGAAGGCGGCTTACTGGACAGTAACTGACGTTGAGGCTCGAAAGCGTGGGGAGCAAACAGGATTAGAT<br/> ACCCTAGTAGTCC</p>                                |
| OTU434  | <p>GTGGGAATATTGCACAATGGGGAAACCCCTGATGCAGCGACCCGCGTGAGTGAAGAAGTATTCGGT<br/> ATGTAAAGCTCTATCAGCAGGGAAGAAAATGACGGTACCTGACTAAGAAGCCCGGCTAACTACGTGCC<br/> AGCAGCCGCGGTAATACGTAGGGGCAAGCGTTATCCGGATTACTGGGTGTAAGGGAGCGTAGACGG<br/> CGGAGCAAGTCTGAAGTGAAGCCCGGGGCTCAACCCCGGACTGCTTTGAAACTGTTCTGCTAGAG</p>                                                                                                                                                                                                        |



|        |                                                                                                                                                                                                                                                                                                                                                                                                                                                                        |
|--------|------------------------------------------------------------------------------------------------------------------------------------------------------------------------------------------------------------------------------------------------------------------------------------------------------------------------------------------------------------------------------------------------------------------------------------------------------------------------|
|        | <p>TGCTGGAGAGGTAAGTGAATTCCTAGTGTAGCGGTGAAATGCGTAGATATTAGGAGGAACACCAGTGG<br/>CGAAGGCGGCTTACTGGACAGTAACTGACGTTGAGGCTCGAAAGCGTGGGGAGCAAACAGGATTAGAA<br/>ACCCTAGTAGTCC</p>                                                                                                                                                                                                                                                                                                 |
| OTU972 | <p>GTGGGAATATTGCACAATGGGCAGAACCTGATGCAGCGACGCCGCTGAGTGAAGAAGTATTCGGT<br/>ATGTAAAGCTCTATCAGCAGGGAAGATAATGACGGTACCTGACTAAGAAGCCCCGGCTAACTACGTGCC<br/>AGCAGCCGCGGTAATACGTAGGGGCAAGCGTTATCCGGATTTACTGGGTGTAAGGGAGCGTAGACGG<br/>CATGGCAAGTCTGAAGTGAACCCAGGGCTCAACCCTGGGACTGCTTTGGAACTGTCAAGCTAGAG<br/>TGCAGGAGAGGTAAGTGAATTCCTAGTGTAGCGGTGAAATGCGTAGATATTAGGAGGAACACCAGTGG<br/>CGAAGGCGGCTTACTGGACTGTAAGTACGTTGAGGCTCGAAAGCGTGGGGAGCAAACAGGATTAGAA<br/>ACCCTAGTAGTCC</p>    |
| OTU523 | <p>GTGGGAATATTGCACAATGGGGAAACCCTGATGCAGCGACGCCGCTGAGCGAAGAAGTATTCGGT<br/>ATGTAAAGCTCTATCAGCAGGGAAGATAATGACGGTACCTGACTAAGAAGCCCCGGCTAACTACGTGCC<br/>AGCAGCCGCGGTAATACGTAGGGGCAAGCGTTATCCGGATTTACTGGGTGTAAGGGAGCGTAGACGG<br/>CAAGGCAAGTCTGATGTGAAAACCCAGGGCTTAACCCTGGGACTGCATTGGAACTGTCTGGCTCGAGT<br/>GCCGGAGAGGTAAGCGGAATTCCTAGTGTAGCGGTGAAATGCGTAGATATTAGGAAGAACACCAGTGGC<br/>GAAGGCGGCTTACTGGACGTAAGTACGTTGAGGCTCGAAAGCGTGGGGAGCAAACAGGATTAGAAA<br/>CCCTAGTAGTCC</p>  |
| OTU459 | <p>GTGGGAATATTGCACAATGGGGAAACCCTGATGCAGCGACGCCGCTGAGCGAAGAAGTATTCGGT<br/>ATGTAAAGCTCTATCAGCAGGGAAGATAATGACGGTACCTGACTAAGAAGTCCGGCTAAATACGTGCCA<br/>GCAGCCGCGGTAATACGTATGGAGCAAGCGTTATCCGGATTTACTGGGTGTAAGGGAGCGTAGCGGTA<br/>TGGCAAGTCTGATGTGAAAGGCCGGGCTCAACCCCGGACTGCATTGGAACTGTACACTTGAGTGT<br/>CGGAGAGGTAAGTGAATTCCTAGTGTAGCGGTGAAATGCGTAGATATTAGGAGGAACACCAGTGGCGA<br/>AGGCGGCTTACTGGACGACAAGTACGCTGAGGCTCGAAAGCGTGGGGAGCAAACAGGATTAGAAACC<br/>CTAGTAGTCC</p>      |
| OTU754 | <p>GTGGGAATATTGCACAATGGGGAAACCCTGATGCAGCGACGCCGCTGAGTGAAGAAGTATTCGGT<br/>ATGTAAAGCTCTATCAGCAGGGAAGAAAATGACGGTACCTGACTAAGAAGCCCCGGCTAACTACGTGCC<br/>AGCAGCCGCGGTAATACGTAGGGGCAAGCGTTATCCGGATTTACTGGGTGTAAGGGAGCGTAGACGG<br/>CATGACAAGCCAGATGTGAAAACCCAGGGCTCAACCCTGGGACTGCATTGGAACTGCCAGGCTGGAG<br/>TGCAGGAGAGGTAAGCGGAATTCCTAGTGTAGCGGTGAAATGCGTAGATATTAGGAGGAACACCAGTGG<br/>CGAAGGCGGCTTACTGGACTGTAAGTACGTTGAGGCTCGAAAGCGTGGGGAGCAAACAGGATTAGAA<br/>ACCCTAGTAGTCC</p> |
| OTU456 | <p>GTGGGAATATTGCACAATGGGGAAACCCTGATGCAGCGACGCCGCTGAGTGAAGAAGTATTCGGT<br/>ATGTAAAGCTCTATCAGCAGGGAAGAAAATGACGGTACCTGACTAAGAAGCCCCGGCTAACTACGTGCC<br/>AGCAGCCGCGGTAATACGTAGGGGCAAGCGTTATCCGGATTTACTGGGTGTAAGGGAGCGTAGACGG<br/>CATGGCAAGTCTGAAGTGAATGCGGGGCTCAACCCTGAACTGCTTTGGAACTGTGAGGCTGGAGT<br/>GCAGGAGAGGTAAGTGAATTCCTAGTGTAGCGGTGAAATGCGTAGATATTAGGAGGAACACCAGTGGC<br/>GAAGGCGGCTTACTGGACTGTAAGTACGTTGAGGCTCGAAAGCGTGGGGAGCAAACAGGATTAGATA<br/>CCCTAGTAGTCC</p>     |
| OTU185 | <p>GTGGGAATATTGCACAATGGGGAAACCCTGATGCAGCAACGCCGCTGAGTGAAGAAGTATTCGGT<br/>ATGTAAAGCTCTATCAGCAGGGAAGAAAATGACGGTACCTGAGTAAGAAGCCCCGGCTAACTACGTGCC<br/>AGCAGCCGCGGTAATACGTAGGGGCAAGCGTTATCCGGATTTACTGGGTGTAAGGGAGCGTAGACGG<br/>CGAGGCAAGTCTGATGTGAAAGCTGGGGCTTAACCCCGGAACTGCATTGGAACTGCTTTGCTGGAGT<br/>GCCGGAGAGGTAAGCGGAATTCCTAGTGTAGCGGTGAAATGCGTAGATATTAGGAGGAACACCAGTGGC<br/>GAAGGCGGCTTACTGGACGTAAGTACGTTGAGGCTCGAAAGCGTGGGGAGCAAACAGGATTAGAAA</p>                    |

|         |                                                                                                                                                                                                                                                                                                                                                                                                                                                                |
|---------|----------------------------------------------------------------------------------------------------------------------------------------------------------------------------------------------------------------------------------------------------------------------------------------------------------------------------------------------------------------------------------------------------------------------------------------------------------------|
|         | CCCTAGTAGTCC                                                                                                                                                                                                                                                                                                                                                                                                                                                   |
| OTU181  | GTGGGAATATTGCACAATGGGGAAACCCTGATGCAGCGACGCCGCGTGAGTGAGGAAGTATTTCCGGT<br>ATGTAAAGCTCTATCAGCAGGGAAGAAGAAATGACGGTACCTGACTAAGAAGCCCCGGCTAACTACGTG<br>CCAGCAGCCCGGTAATACGTAGGGGCAAGCGTTATCCGGATTTACTGGGTGTAAAGGGAGCGCAGGC<br>GGCATGATAAGTCTGATGTGAAAACCAAGGCTCAACCATGGGACTGCATTGGAACTGTCGTGCTGGA<br>GTGTCGGAGAGGTAAGCGGAATTCCTAGTGTAGCGGTGAAATGCGTAGATATTAGGAGGAACACCAAGTG<br>GCGAAGGGCGCTTACTGGACGATGACTGACGCTGAGGCTCGAAAGCGTGGGGAGCAAACAGGATTAGA<br>AACCTAGTAGTCC |
| OTU1173 | GTGGGAATATTGCACAATGGGC GAAAGCCTGATGCAGCGACGCCGCGTGAGTGAAGAAGTATTTCCGGT<br>ATGTAAAGCTCTATCAGCAGGGAAGAAAATGACGGTACCTGACTAAGAAGCCCCGGCTAACTACGTGCC<br>AGCAGCCCGGTAATACGTAGGGGCAAGCGTTATCCGGATTTACTGGGTGTAAAGGGAGCGTAGACGG<br>TTAAGCAAGTCTGAAGTGAAAGCCCCGGGCTCAACCCCGGTAAGTCTTTGGAACTGTTTGACTTGAGT<br>GCAGGAGAGGTAAGTGAATTCTAGTGTAGCGGTGAAATGCGTAGATATTAGGAGGAACACCAAGTGGC<br>GAAGGGCGCTTACTGGACTGTAAGTACGTTGAGGCTCGAAAGCGTGGGGAGCAAACAGGATTAGATA<br>CCCTTGTAGTCC  |
| OTU336  | GTGGGAATATTGCACAATGGGC GAAAGCCTGATGCAGCGACGCCGCGTGAACGAAGAAGTATTTCCGGT<br>ATGTAAAGTCTATCAGCAGGGAAGAAGAAATGACGGTACCTGACTAAGAAGCTCCGGCTAAATACGTG<br>CCAGCAGCCCGGTAATACGTATGGAGCAAGCGTTATCCGGATTTACTGGGTGTAAAGGGAGCGTAGGC<br>GGTCTTATAAGTCTGATGTGAAAGCCCCGGGCTCAACCCCGGACTGCATTGGAACTGTAGGACTAGA<br>GTGTCGGAGGGTAAGTGAATTCTAGTGTAGCGGTGAAATGCGTAGATATTAGGAGGAACACCAAGTG<br>GCGAAGGGCGCTTACTGGACGATTACTGACGCTGAGGCTCGAAAGCGTGGGGAGCAAACAGGATTAGA<br>AACCTAGTAGTCC  |
| OTU877  | GTGGGAATATTGCACAATGGGGAAACCCTGATGCAGCGACGCCGCGTGAGCGATGAAGTATTTCCGGT<br>ATGTAAAGCTCTATCAGCAGGGAAGAAAATGACGGTACCTGACTAAGAAGCCCCGGCTAACTACGTGCC<br>AGCAGCCCGGTAATACGTAGGGGCAAGCGTTATCCGGATTTACTGGGTGTAAAGGGAGCGCAGACGG<br>CACTGCAAGTCTGAAGTGAAAGCCCCGGGCTCAACCCCGGACTGCTTTGGAACTGTAGAGCTAGAG<br>TGCTGGAGAGGCAAGCGGAATTCCTAGTGTAGCGGTGAAATGCGTAGATATTAGGAAGAACACCAAGTGG<br>CGAAGGGCGCTTGTGACAGTAACTGACGTTGAGGCTCGAAAGCGTGGGGAGCAAACAGGATTAGAT<br>ACCCTAGTAGTCC    |
| OTU1090 | GTGGGAATATTGCACAATGGGGAAACCCTGATGCAGCGACGCCGCGTGAGTGAAGAAGTATTTCCGGT<br>ATGTAAAGCTCTATCAGCAGGGAAGAAAATGACGGTACCTGACTAAGAAGCCCCGGCTAACTACGTGCC<br>AGCAGCCCGGTAATACGTAGGGGCAAGCGTTATCCGGATTTACTGGGTGTAAAGGGAGCGTAGACGG<br>CTTTGCAAGTCTGACGTGAAACTCCGGGCTCAACTCCGGAAGTGGTGGAACTGTAAGGCTTGAGT<br>GCCGGAGAGGTAAGCGGAATTCCTAGTGTAGCGGTGAAATGCGTAGATATTAGGAGGAACACCAAGTGGC<br>GAAGGGCGCTTACTGGACGGCAACTGACGTTGAGGCTCGAAAGCGTGGGGAGCAAACAGGATTAGAAA<br>CCCTAGTAGTCC    |
| OTU306  | GTGGGAATATTGCACAATGGGC GAAAGCCTGATGCAGCGACGCCGCGTGAGCGAAGAAGTATTTCCGGT<br>ATGTAAAGCTCTATCAGCAGGGAAGATAATGACGGTACCTGACTAAGAAGCACC GGCTAAATACGTGCC<br>AGCAGCCCGGTAATACGTATGGTGCAAGCGTTATCCGGATTTACTGGGTGTAAAGGGAGCGTAGACGGC<br>AAGGCAAGTCTGATGTGAAAACCAAGGCTTAACCTGGGACTGCATTGGAACTGTCGTGCTCGAGTG<br>CCGGAGAGGTAAGCGGAATTCCTAGTGTAGCGGTGAAATGCGTAGATATTAGGAAGAACACCAAGTGGC<br>AAGGGCGCTTACTGGACGGTAACTGACGTTGAGGCTCGAAAGCGTGGGGAGCAAACAGGATTAGAAA<br>CCTAGTAGTCC |
| OTU1288 | GTGGGAATATTGCACAATGGGGAAACCCTGATGCAGCAACGCCGCGTGAGTGAAGAAGTATTTCCGGT                                                                                                                                                                                                                                                                                                                                                                                           |

|         |                                                                                                                                                                                                                                                                                                                                                                                                                                                                              |
|---------|------------------------------------------------------------------------------------------------------------------------------------------------------------------------------------------------------------------------------------------------------------------------------------------------------------------------------------------------------------------------------------------------------------------------------------------------------------------------------|
|         | <p>ATGTAAAGCTCTATCAGCAGGGAAGAAAATGACGGTACCTGACTAAGAAGCCCCGGCTAACTACGTGCC<br/> AGCAGCCCGGTAATACGTAGGGGCAAGCGTTATCCGGATTACTGGGTGTAAGGGAGCGCAGGCGG<br/> TCTGGCAAGTCTGATGTGAAATCCCGGGCTCAACCCTGGAACCTGCATTGGAACTGTCAGACTAGAGT<br/> GCCGGAGAGGTAAGTGAATTCTAGTGTAGCGGTGAAATGCGTAGATATTAGGAGGAACACCAGTGGC<br/> GAAGGCGGCTTACTGGACGGTAACTGACGCTGAGGCTCGAAAGCGTGGGAGCAAACAGGATTAGAAA<br/> CCCTAGTAGTCC</p>                                                                            |
| OTU1326 | <p>GTGGGAATATTGCGCAATGGGGAAACCCTGACGCAGCAACGCCGCGTGATTGAAGAAGGCCCTTCGG<br/> GTTGTAAGATCTTAATTCGGGACGAATTTGACGGTACCGAAAGAATAAGCTCCGGCTAACTACGTGC<br/> CAGCAGCCCGGTAATACGTAGGGAGCAAGCGTTATCCGGATTACTGGGTGTAAGGGAGCGCAGGCGG<br/> GTGCGCAAGTCTGATGTGAAAGCCCGGGCTCAACCCCGTACTGCATTGGAACTGTCGACTAGAG<br/> TGTGCGAGGGTAAGCGGAATTCCTAGTGTAGCGGTGAAATGCGTAGATATTAGGAGGAACACCAGTGG<br/> CGAAGGCGGCTTACTGGACGATAACTGACGCTGAGGCTCGAAAGCGTGGGAGCAAACAGGATTAGAA<br/> ACCCTAGTAGTCC</p>     |
| OTU660  | <p>GTGGGGATATTGCACAATGGAGGAAACTCTGATGCAGCGACGCCGCGTGAGTGAAGAAGTATTTCCGGT<br/> ATGTAAAGCTCTATCAGCAGGGAAGAAAATGACGGTACCTGACTAAGAAGCCCCGGCTAACTACGTGCC<br/> AGCAGCCCGGTAATACGTAGGGGCAAGCGTTATCCGGATTACTGGGTGTAAGGGAGCGTAGACGG<br/> CGATGCAAGTCTGAAGTGAATACCCGGGCTCAACCTGGAACTGCTTTGGAACTGTATGGCTAGAGT<br/> GCTGGAGAGTAAGCGGAATTCCTAGTGTAGCGGTGAAATGCGTAGATATTAGGAAGAACACCAGTGGC<br/> GAAGGCGGCTTACTGGACAGTAACTGACGTTAGGCTCGAAAGCGTGGGAGCAAACAGGATTAGAAA<br/> CCCTAGTAGTCC</p>   |
| OTU493  | <p>GTGGGAATATTGACAATGGGGAAACCCTGATCCAGCGACGCCGCGTGAGTGAAGAAGTATTTCCGGT<br/> ATGTAAAGCTCTATCAGCAGGGAAGAAAATGACGGTACCTGACTAAGAAGCCCCGGCTAACTACGTGCC<br/> AGCAGCCCGGTAATACGTAGGGGCAAGCGTTATCCGGATTACTGGGTGTAAGGGAGCGCAGACGG<br/> CAATGCAAGTCTGAAGTGAAGGCGTGGGCTCAACCCATGAACTGCTTTGGAACTGTATAGCTTGAGT<br/> GTCGGAGGGTAAGCGGAATTCCTAGTGTAGCGGTGAAATGCGTAGATATTAGGAGGAACACCGGAGGC<br/> GAAGGCGGCTTACTGGACGACAACCTGACGTTAGGCTCGAAAGCGTGGGAGCAAACAGGATTAGAAA<br/> CCCCTGATGTC</p>    |
| OTU466  | <p>GTGGGAATATTGCACAATGGGGAAACCCTGATGCAGCAACGCCGCGTGAGTGAAGAAGTATTTCCGGT<br/> ATGTAAAGCTCTATCAGCAGGGAAGAAAATGACGGTACCTGACTAAGAAGCCCCGGCTAACTACGTGCC<br/> AGCAGCCCGGTAATACGTAGGGGCAAGCGTTATCCGGATTACTGGGTGTAAGGGAGCGCAGGCGG<br/> TGCGCAAGTCTAGATGTGAAAACCCGGGCTCAACCCGGGACTGCATTGAACTGTCGGACTAGAGT<br/> GCCGGAGAGGTAAGTGAATTCTAGTGTAGCGGTGAAATGCGTAGATATTAGGAGGAACACCAGTGGC<br/> GAAGGCGGCTTACTGGACGGTAACTGACGCTGAGGCTCGAAAGCGTGGGAGCAAACAGGATTAGAAA<br/> CCCTAGTAGTCC</p>     |
| OTU93   | <p>GTGGGAATATTGCACAATGGGCAAGCCTGATGCAGCGACGCCGCGTGAGTGAAGAAGTATTTCCGGT<br/> ATGTAAAGCTCTATCAGCAGGGAAGAAAATGACGGTACCTGAGTGAAGAAGCTCCGGCTAAATACGT<br/> GCCAGCAGCCCGGTAATACGTATGGAGCAAGCGTTATCCGGATTACTGGGTGTAAGGGAGCGTAGG<br/> CGGCAGAGCAAGTCTGATGTGAAAGCCCGGGCTCAACCCGGTAGTGCATTGAACTGTTACAGCTCG<br/> AGTGTGCGAGGGTAAGCGGAATTCCTGGTGTAGCGGTGAAATGCGTAGATATTAGGAGGAACACCGGA<br/> GGCGAAGGCGGCTTACTGGACGATTACTGACGCTGAGGCTCGAAAGCGTGGGAGCGAAACAGGATTAG<br/> ATACCCTAGTAGTCC</p> |
| OTU938  | <p>GTGGGAATATTGCACAATGGAGGAAACTCTGATGCAGCGACGCCGCGTGAGTGAAGAAGTAGTTCCGT<br/> ATGTAAAGCTCTATCAGCAGGGAAGATAGTACGGTACCTGACTAAGAAGCTCCGGCTAAATACGTGCC<br/> AGCAGCCCGGTAATACGTATGGAGCAAGCGTTATCCGGATTACTGGGTGTAAGGGAGTGTAGGTGGC</p>                                                                                                                                                                                                                                               |

|                      |         |                                                                                                                                                                                                                                                                                                                                                                                                                                                            |
|----------------------|---------|------------------------------------------------------------------------------------------------------------------------------------------------------------------------------------------------------------------------------------------------------------------------------------------------------------------------------------------------------------------------------------------------------------------------------------------------------------|
|                      |         | CAGGCAAGTCAGAAAGTGAAGCCGGGGCTCAACCCGGTACTGCATTGGAACTGGTCATCTAGAGT<br>GTCGGAGGGGTAAGTGAATTCTAGTGTAGCGGTGAAATGCGTAGATATTAGGAGGAACACCAGTGGC<br>GAAGGCGGCTTACTGGACGATAACTGACGCTGAGGCTCGAAAGCGTGGGGAGCAAACAGGATTAGAAA<br>CCCTAGTAGTCC                                                                                                                                                                                                                           |
|                      | OTU1402 | GTGGGAATATTGCACAATGGGGAAACCCTGATGCAGCAACGCCGCGTGAGTGAAGAAGTATTCGGT<br>ATGTAAAGCTCTATCAGCAGGGAAGAAAATGACGGTACCTGACTAAGAAGCACCGGCTAAATACGTGCC<br>AGCAGCCGCGTAATACGTATGGTGCAAGCGTTATCCGGATTACTGGGTGTAAAGGGAGCGCAGCGG<br>TCTGGCAAGTCTGATGTGAAAATCCGGGGCTCAACTCCGGAATGCATTGGAACTGTCAGACTAGAGT<br>GTCGGAGAGGTAAGTGAATTCTAGTGTAGCGGTGAAATGCGTAGATATTAGGAGGAACACCAGTGGC<br>GAAGGCGGCTTACTGGACGATAACTGACGCTGAGGCTCGAAAGCGTGGGGAGCAAACAGGATTAGAAA<br>CCCTAGTAGTCC    |
| Coproccoccus_<br>unc | OTU339  | GTGGGAATATTGCACAATGGGGAAACCCTGATGCAGCAACGCCGCGTGAGTGAAGAAGTATTCGGT<br>ATGTAAAGCTCTATCAGCAGGGAAGATAATGACGGTACCTGACTAAGAAGTCCGGCTAAATACGTGCCA<br>GCAGCCGCGTAATACGTATGGAGCAAGCGTTATCCGGATTACTGGGTGTAAAGGGTGCAGTAGTGGCA<br>GTGCAAGTCAGATGTGAAAGCCGGGGCTCAACCCGGAGCTGCATTGAACTGCTCGGCTAGAGTAC<br>AGGAGAGGCAGGCGGAATTCCTAGTGTAGCGGTGAAATGCGTAGATATTAGGAGGAACACCAGTGGCGA<br>AGGCGGCTGCTGGACTGTTACTGACACTGAGGCACGAAAGCGTGGGGAGCAAACAGGATTAGAAACC<br>CTAGTAGTCC     |
|                      | OTU1141 | GTGGGAATATTGCACAATGGGGAAACCCTGATGCAGCAGCGCCGCGTGAAGGACGACGTATTCGGT<br>ATGTAAACTTCTATCAGCAGGGAAGAAAAGATGACGGTACCTGACTAAGAAGCCCCGGCTAACTACGTG<br>CCAGCAGCCGCGTAATACGTAGGGGCAAGCGTTATCCGGATTACTGGGTGTAAAGGGAGCGTAGGC<br>GGCGCGCAAGTCAGAAGTGA AACCCAGGGCTTAACTCTGGGATTGCTTTTGAACTGTCGGGCTGG<br>ATTGCCGAGAGGTAAGTGAATTCTAGTGTAGCGGTGAAATGCGTAGATATTAGGAGGAACACCAGT<br>GGCGAAGCGGCTTACTGGACGGTAATGACGCTGAGGCTCGAAAGCGTGGGGAGCAAACAGGATTAG<br>AAACCCAGTAGTCC      |
|                      | OTU1069 | GTGGGAATATTGCACAATGGGGAAACCCTGATGCAGCAACGCCGCGTGAAGGAAGAAGTATTCGGT<br>ATGTAAACTTCTATCAGCAGGGAAGAAAATGACGGTACCTGACTAAGAAGTCCGGCTAAATACGTGCC<br>AGCAGCCGCGTAATACGTATGGAGCAAGCGTTATCCGGATTACTGGGTGTAAAGGGAGCGTAGGCGG<br>TTATGCAAGTCAGATGTGAAAGCCGGGGCTTAAACCCGGGACTGCATTGAACTGTGTAAGTACTAGAGT<br>GTCGGAGAGGTAAGTGAATTCTAGTGTAGCGGTGAAATGCGTAGATATTAGGAGGAACACCAGTGGC<br>GAAGGCGGCTTACTGGACGATAACTGACGCTGAGGCTCGAAAGCGTGGGGAGCAAACAGGATTAGAAA<br>CCCTAGTAGTCC  |
|                      | OTU708  | GTGGGAATATTGCACAATGGGGAAACCCTGATGCAGCAGCGCCGCGTGAGTGAAGAAGTATTCGGT<br>ATGTAAAGCTCTATCAGCAGGGAAGATAATGACGGTACCTGACTAAGAAGCCCCGGCTAACTACGTGCC<br>AGCAGCCGCGTAATACGTAGGGGCAAGCGTTATCCGGATTACTGGGTGTAAAGGGTGCAGTAGTGG<br>TATGGTAAGTCAGAAGTGA AACCCGGGGCTCAACTCCGCGGATTGCTTTTGAACTATCAGACTGGAG<br>TACCGGAGAGGTAAGCGGAATTCCTAGTGTAGCGGTGAAATGCGTAGATATTAGGAGGAACACCAGTGG<br>CGAAGGCGGCTTACTGGACGGTAACTGACACTGAGGCACGAAAGCGTGGGGAGCAAACAGGATTAGAT<br>ACCCGTGAGTCC |
|                      | OTU1176 | GTGGGAATATTGCACAATGGGGAAACCCTGATGCAGCAACGCCGCGTGAAGGACGACGTATTCGGT<br>ATGTAAACTTCTATCAGCAGGGAAGAAAATGACGGTACCTGACTAAGAAGCCCCGGCTAACTACGTGCC<br>AGCAGCCGCGTAATACGTAGGGGCAAGCGTTATCCGGATTACTGGGTGTAAAGGGAGCGTAGGCGG<br>CGAGGCAAGTCAGAAGTGA AACCCAGGGCTCAACTCTGGGATTGCTTTTGAACTGCTTTGCTGATT<br>TCAGGAGAGGTAAGCGGAATTCCTAGTGTAGCGGTGAAATGCGTAGATATTAGGAGGAACACCAGTGGC                                                                                          |

|         |                                                                                                                                                                                                                                                                                                                                                                                                                                                             |
|---------|-------------------------------------------------------------------------------------------------------------------------------------------------------------------------------------------------------------------------------------------------------------------------------------------------------------------------------------------------------------------------------------------------------------------------------------------------------------|
|         | GAAGGCGGCTTACTGGACTGACAATGACGCTGAGGCTCGAAAGCGTGGGGAGCAAACAGGATTAGATA<br>CCCTAGTAGTCC                                                                                                                                                                                                                                                                                                                                                                        |
| OTU802  | GTGGGAATATTGCACAATGGGGAAACCCTGATGCAGCGACGCCGCTGAAGGAAGACGTATTTCGGT<br>ATGTAACTTCTATCAGCAAGGAAGATGATGACGGTACTTGACTAAGAAGCCCCGGCTAACTACGTGCCA<br>GCAGCCCGGTAATACGTAGGGGCAAGCGTTATCCGGATTTACTGGGTGTAAAGGGAGCGTAGGCGGC<br>CATGCAAGTCAGAAGTAAAGCCCGGGCTCAACCCCGGACTGCTTTTGAAACTGTAGGGCTAGATTG<br>CCGGAGAGGTGAGCGGAATTCCTAGTGTAGCGGTGAAATGCGTAGATATTAGGAGGAACACCAGTGGCG<br>AAGGCGGCTCACTGGACGGTAAATGACGCTGAGGCTCGAAAGCGTGGGGAGCAAACAGGATTAGAAAC<br>CCCTAGTAGTCC   |
| OTU224  | GTGGGAATATTGCACAATGGGGAAACCCTGATGCAGCGACGCCGCTGAAGGAAGACGTATTTCGGT<br>ATGTAACTTCTATCAGCAGGGAAGATAATGACGGTACTTGACTAAGAAGCCCCGGCTAACTACGTGCCA<br>GCAGCCCGGTAATACGTAGGGGCAAGCGTTATCCGGATTTACTGGGTGTAAAGGGAGCGTAGGCGGC<br>TTGGTAAAGTCAGAAGTAAAGCCAGGGCTTAACCCGACTGCTTTTGAAACTGCCAGGCTTGATTG<br>CCGGAGAGGTAAGTGAATTCCTAGTGTAGCGGTGAAATGCGTAGATATTAGGAGGAACACCAGTGGCG<br>AAGGCGGCTTACTGGACGGTAAATGACGCTGAGGCTCGAAAGCGTGGGGAGCAAACAGGATTAGATA<br>CCTTGTAGTCC       |
| OTU950  | GTGGGAATATTGCACAATGGGGAAACCCTGATGCAGCGACGCCGCTGAGTGAAGAAGTATTTCGGT<br>ATGTAAAGCTCTATCAGCAGGGAAGAAAATGACGGTACTTGACTAAGAAGCCCCGGCTAACTACGTGCC<br>AGCAGCCCGGTAATACGTAGGGGCAAGCGTTATCCGGATTTACTGGGTGTAAAGGGTGCCTAGGTGG<br>TCTGGCAAGTCAGAAGTAAAGCCAGGGCTTAACCCGACTGCTTTTGAAACTGTCAGACTAGAGT<br>GCAGGAGAGGCAAGCGGAATTCCTAGTGTAGCGGTGAAATGCGTAGATATTAGGAGGAACACCAGTGGC<br>GAAGGCGGCTTGCTGGACTGTTACTGACACTGAGGCACGAAAGCGTGGGGAGCAAACAGGATTAGAAA<br>CCCTAGTAGTCC     |
| OTU674  | GTGGGAATATTGCACAATGGGGAAACCCTGATGCAGCGACGCCGCTGAGTGAAGAAGTATTTCGGT<br>ATGTAAAGCTCTATCAGCAGGGAAGAAAACAGACGGTACTTGACTAAGAAGCCCCGGCTAACTACGTGC<br>CAGCAGCCCGGTAATACGTAGGGGCAAGCGTTATCCGGAATTACTGGGTGTAAAGGGTGCCTAGGTG<br>GCATGGTAAAGTCAGAAGTAAAGCCCGGGCTTAACCCCGGACTGCTTTTGAAACTGTCAGCTGGAG<br>TGCAGGAGAGGTAAGCGGAATTCCTAGTGTAGCGGTGAAATGCGTAGATATTAGGAGGAACACCAGTGG<br>CGAAGGCGGCTTACTGGACTGTCAGTACTGACTGATGCACGAAAGCGTGGGGAGCAAACAGGATTAGAA<br>ACCCTAGTAGTCC |
| OTU583  | GTGGGAATATTGCACAATGGGGAAACCCTGATGCAGCGACGCCGCTGAGTGTGAAGTATTTCGGT<br>ATGTAAACTCTATCAGCAGGGAAGATAATGACGGTACTTGACTAAGAAGCACCGGCTAAATACGTGCC<br>AGCAGCCCGGTAATACGTATGGTGAAGCGTTATCCGGATTTACTGGGTGTAAAGGGTGCCTAGGTGGT<br>ATGGCAAGTCAGAAGTAAAGGCTGGGGCTCAACCCCGGACTGCTTTTGAAACTGTCAAAGTACTAGAGT<br>ACAGGAGAGGAAAGCGGAATTCCTAGTGTAGCGGTGAAATGCGTAGATATTAGGAGGAACACCAGTGGC<br>GAAGGCGGCTTCTGGACTGAAACTGACACTGAGGCACGAAAGCGTGGGGAGCAAACAGGATTAGAAA<br>CCCTAGTAGTCC  |
| OTU1126 | GTGGGAATATTGCACAATGGGGAAACCCTGATGCAGCGACGCCGCTGAGTGAAGAAGTATTTCGGT<br>ATGTAAAGCTCTATCAGCAGGGAAGAAAATGACGGTACTTGACTAAGAAGCCCCGGCTAACTACGTGCC<br>AGCAGCCCGGTAATACGTAGGGGCAAGCGTTATCCGGAATTACTGGGTGTAAAGGGTGCCTAGGTGG<br>TATGGCAAGTCAGAAGTAAAGCCAGGGCTTAACCTGACTGCTTTTGAAACTGTCAGACTGGAGT<br>GCAGGAGAGGTAAGCGGAATTCCTAGTGTAGCGGTGAAATGCGTAGATATTAGGAGGAACATCAGTGGC<br>GAAGGCGGCTTACTGGACTGAAACTGACACTGAGGCACGAAAGCGTGGGGAGCAAACAGGATTAGAA<br>ACCCTAGTAGTCC     |

|         |                                                                                                                                                                                                                                                                                                                                                                                                                                                        |
|---------|--------------------------------------------------------------------------------------------------------------------------------------------------------------------------------------------------------------------------------------------------------------------------------------------------------------------------------------------------------------------------------------------------------------------------------------------------------|
| OTU452  | GTGGGAATATTGCACAATGGGGAAACCCTGATGCAGCAACGCCCGTGAGTGAAGAAGTATTCGGT<br>ATGTAAAGCTCTATCAGCAGGGAAGAAAATGACGGTACCTGACTAAGAAGCCCCGGCTAACTACGTGCC<br>AGCAGCCCGGTAATACGTAGGGGCAAGCGTTATCCGGATTACTGGGTGTAAGGGAGCGTAGGCCG<br>TTTGGCAAGTCAGAAAGTAAAGCCCAAGGCTTAACCATGGGACTGCTTTTGAAACTGTCAGACTAGATT<br>GCAGGAGAGGTAAGTGAATTCTGTGTAGCGGTGAAATGCGTAGATATCAGGAGGAACACCGGTGGC<br>GAAGGCCGCTTACTGGACTGTAAATGACGCTGAGGCTCGAAAGCGTGGGGAGCAAACAGGATTAGATA<br>CCCTGGTAGTCC |
| OTU1065 | GTGGGAATATTGCACAATGGGGAAACCCTGATGCAGCAGCGCCCGTGAAAGGAAGAAGTATTCGGT<br>ATGTAAACTTCTATCAGCAGGGAAGAAAATGACGGTACCTGACTAAGAAGCCCCGGCTAACTACGTGC<br>CAGCAGCCCGGTAATACGTAGGGGCAAGCGTTATCCGGATTACTGGGTGTAAGGGAGCGTAGGCCG<br>GCGATGCAAGTCAGAAGTAAAGCCAGGGCTTAACCGTGGGACTGCTTTGAAACTGTGTGTGGAT<br>TGCCGGAGAGGTAAGTGAATTCTAGTGTAGCGGTGAAATGCGTAGATATTAGGAGGAACACCACTGG<br>CGAAGGCCGCTTACTGGACTGTAAATGACGCTGAGGCTCGAAAGCGTGGGGAGCAAACAGGATTAGAT<br>ACCCCTGTAGTCC   |
| OTU1121 | GTGGGAATATTGCACAATGGGGAAACCCTGATGCAGCAGCGCCCGTGAAAGGAAGAAGTATTCGGT<br>ATGTAAACTTCTATCAGCAGGGAAGAAAATGACGGTACCTGACTAAGAAGCCCCGGCTAACTACGTGCC<br>AGCAGCCCGGTAATACGTAGGGGCAAGCGTTATCCGGATTACTGGGTGTAAGGGAGCGTAGGCCG<br>TCAGACAAGTCAGAAGTAAAGCCCGGGCTCAACTCCGGGACTGCTTTTGAAACTGCCTGACTAGATT<br>GCAGGAGAGGTAAGTGAATTCTAGTGTAGCGGTGAAATGCGTAGATATTAGGAGGAACACCACTGGC<br>GAAGGCCGCTTACTGGACTGTAAATGACGCTGAGGCTCGAAAGCGTGGGGAGCAAACAGGATTAGAAA<br>CCCTAGTAGTCC |
| OTU1289 | GTGGGAATATTGCACAATGGGGAAACCCTGATGCAGCAGCGCCCGTGAAAGGAAGAAGTATTCGGT<br>ATGTAAACTTCTATCAGCAGGGAAGAAAATGACAGTACCTGACTAAGAAGCCCCGGCTAACTACGTGCC<br>AGCAGCCCGGTAATACGTAGGGGCAAGCGTTATCCGGATTACTGGGTGTAAGGGAGCGTAGGTGG<br>CGATGCAAGCCAGAAGTAAAGCCCGGGCTCAACCCGAGGACTGCTTTTGAAACTGTGTGTGGTA<br>GTGCAGGAGAGGTAAGTGAATTCTAGTGTAGCGGTGAAATGCGTAGATATTAGGAGGAACACCGGTG<br>GCGAAGGCCGCTTACTGGACTGTAAGTACACTGAGGCTCGAAAGCGTGGGGAGCAAACAGGATTAGAA<br>AACCCCTGTAGTCC  |
| OTU610  | GTGGGAATATTGCACAATGGGGAAACCCTGATGCAGCAGCGCCCGTGAAAGGAAGAAGTATTCGGT<br>ATGTAAACTTCTATCAGCAGGGAAGAAAATGACGGTACCTGACTAAGAAGCCCCGGCTAACTACGTGCC<br>AGCAGCCCGGTAATACGTAGGGGCAAGCGTTATCCGGATTACTGGGTGTAAGGGAGCGTAGGCCG<br>TCTGACAAGTCAGAAGTAAAGCCCGGGCTCAACTCCGGGACTGCTTTTGAAACTGCCGACTAGATT<br>GCAGGAGAGGTAAGTGAATTCTAGTGTAGCGGTGAAATGCGTAGATATTAGGAGGAACACCACTGGC<br>GAAGGCCGCTTACTGGACTGTAAATGACGCTGAGGCTCGAAAGCGTGGGGAGCAAACAGGATTAGAAA<br>CCCTAGTAGTCC  |
| OTU365  | GTGGGAATATTGCACAATGGGGAAACCCTGATGCAGCAGCGCCCGTGAGTGAAGAAGTATTCGGT<br>ATGTAAAGCTCTCAGCAGGGAAGAAAATGACGGTACCTGACTAAGAAGCCCCGGCTAACTACGTGCC<br>AGCAGCCCGGTAATACGTAGGGGCAAGCGTTATCCGGAATTACTGGGTGTAAGGGTGCAGTAGGTGG<br>TATGGCAAGTCAGAAGTAAAGCCAGGGCTTAACCTGAGGACTGCTTTTGAAACTGTCAGACTGGAGT<br>GCAGGAGAGGTAAGCGGAATTCTAGTGTAGCGGTGAAATGCGTAGATATTAGGAGGAACATCAGTGGC<br>GAAGGCCGCTTACTGGACTGAAACTGACACTGAGGCACGAAAGCGTGGGGAGCAAACAGGATTAGATA<br>CCCTGTAGTCC  |
| OTU478  | GTGGGAATATTGCACAATGGGGAAACCCTGATGCAGCAGCGCCCGTGAGTGAAGAAGTATTCGGT<br>ATGTAAAGCTCTATCAGCAGGGAAGATAATGACGGTACCTGACTAAGAAGCCCCGGCTAACTACGTGCC                                                                                                                                                                                                                                                                                                             |

|                           |         |                                                                                                                                                                                                                                                                                                                                                                                                                                                              |
|---------------------------|---------|--------------------------------------------------------------------------------------------------------------------------------------------------------------------------------------------------------------------------------------------------------------------------------------------------------------------------------------------------------------------------------------------------------------------------------------------------------------|
|                           |         | AGCAGCCGCGGTAATACGTAGGGGCAAGCGTTATCCGGATTTACTGGGTGTAAGGGTGCGTAGGTGG<br>CAAGGCAAGTCAGATGTGAAAGCCCGGGGCTCAACCCCGGTAAGTTCATTTGAAACTGTCTAGCTAGAGT<br>GCAGGAGAGGTAAGCGGAATTCCTAGTGTAGCGGTGAAATGCGTAGATATTAGGAGGAACACCAAGTGGC<br>GAAGGCGGCTTACTGGACTGTAACACTGACTGAGGCACGAAAGCGTGGGGAGCAAACAGGATTAGAAA<br>CCCTAGTAGTCC                                                                                                                                              |
|                           | OTU274  | GTGGGAATATTGCACAATGGGGGAAACCCTGATGCAGCGACGCCGCGTGAGTGAAGAAGTATTCGGT<br>ATGTAAAGCTCTATCAGCAGGGAAGAAAATGACGGTACCTGACTAAGAAGCCCGGCTAACTACGTGCC<br>AGCAGCCGCGGTAATACGTAGGGGCAAGCGTTATCCGGAATTTACTGGGTGTAAGGGTGCGTAGGTGG<br>TATGGCAAGTCAGAAAGTAAAACCCAGGGCTTAACTCTGGGACTGCTTTTGAAACTGTGACTGGAGT<br>GCAGGAGAGGTAAGCGGAATTCCTAGTGTAGCGGTGAAATGCGTAGATATTAGGAGGAACATCAGTGGC<br>GAAGGCGGCTTACTGGACTGAAACTGACTGAGGCACGAAAGCGTGGGGAGCAAACAGGATTAGATA<br>CCCCTGATGTC     |
| [Ruminococci<br>s] gnavus | OTU1153 | GTGGGAATATTGCACAATGGGGGAAACCCTGATGCAGCGACGCCGCGTGAGGATGAAGTATTCGGT<br>ATGTAAACTTCTATCAGCAGGGAAGAAATGACGGTACCTGACTAAGAAGCCCGGCTAACTACGTGCC<br>AGCAGCCGCGGTAATACGTAGGGGCAAGCGTTATCCGGATTTACTGGGTGTAAGGGAGCGTAGACGG<br>CGATGCAAGCCAGATGTGAAAGCCCGGGGCTCAACCCCGGACTGCATTTGAAACTGCGTGGCTGGAG<br>TGTCGGAGAGGCAGGCGGAATTCCTAGTGTAGCGGTGAAATGCGTAGATATTAGGAGGAACACCAAGTGG<br>CGAAGGCGGCTGCTGGACGATGACTGACGTTGAGGCTCGAAAGCGTGGGGAGCAAACAGGATTAGAA<br>ACCCTAGTAGTCC    |
|                           | OTU541  | GTGGGAATATTGCACAATGGGGGAAACCCTGATGCAGCGACGCCGCGTGAGCGATGAAGTATTCGGT<br>ATGTAAAGCTCTATCAGCAGGGAAGAAAATGACGGTACCTGACTAAGAAGCCCGGCTAACTACGTGCC<br>AGCAGCCGCGGTAATACGTAGGGGCAAGCGTTATCCGGATTTACTGGGTGTAAGGGAGCGTAGACGG<br>CATGGCAAGCCAGATGTGAAAGCCCGGGGCTCAACCCCGGACTGCATTTGAAACTGTGACTAGAGT<br>GTCGGAGAGGAAAGCGGAATTCCTAGTGTAGCGGTGAAATGCGTAGATATTAGGAGGAACACCAAGTGGC<br>GAAGGCGGCTTACTGGACGTAAGTACTGACGTTGAGGCTCGAAAGCGTGGGGAGCAAACAGGATTAGAAA<br>CCCTAGTAGTCC |
|                           | OTU345  | GTGGGAATATTGCACAATGGGCAGAAAGCCTGATGCAGCGACGCCGCGTGAGCGATGAAGTATTCGGT<br>ATGTAAAGCTCTATCAGCAGGGAAGAAAATGACGGTACCTGACTAAGAAGCCCGGCTAACTACGTGCC<br>AGCAGCCGCGGTAATACGTAGGGGCAAGCGTTATCCGGATTTACTGGGTGTAAGGGAGCGTAGACGG<br>CGATGCAAGTCTGGAGTGAAGCCCGGGGCTCAACCCCGGACTGCATTTGAAACTGTGACTAGAGT<br>GTCGGAGAGGAAAGCGGAATTCCTAGTGTAGCGGTGAAATGCGTAGATATTAGGAGGAACACCAAGTGGC<br>GAAGGCGGCTTCTGGACGATGACTGACGTTGAGGCTCGAAAGCGTGGGGAGCAAACAGGATTAGAAA<br>CCCTAGTAGTCC    |
|                           | OTU528  | GTGGGAATATTGCACAATGGGGGAAACCCTGATGCAGCGACGCCGCGTGAGCGATGAAGTATTCGGT<br>ATGTAAAGCTCTATCAGCAGGGAAGAAAATGACGGTACCTGACTAAGAAGCCCGGCTAACTACGTGCC<br>AGCAGCCGCGGTAATACGTAGGGGCAAGCGTTATCCGGATTTACTGGGTGTAAGGGAGCGTAGACGG<br>CATGGCAAGCCAGATGTGAAAGCCCGGGGCTCAACCCCGGACTGCATTTGAAACTGTGACTAGAGT<br>GTCGGAGAGGAAAGCGGAATTCCTAGTGTAGCGGTGAAATGCGTAGATATTAGGAGGAACACCAAGTGGC<br>GAAGGCGGCTTCTGGACGATGACTGACGTTGAGGCTCGAAAGCGTGGGGAGCAAACAGGATTAGAAA<br>CCCTAGTAGTCC    |
|                           | OTU1125 | GTGGGAATATTGCACAATGGAGGAAACTCTGATGCAGCGACGCCGCGTGAGGATGAAGTATTCGGT<br>ATGTAAACTTCTATCAGCAGGGAAGAAAATGACGGTACCTGACTAAGAAGCCCGGCTAACTACGTGCC<br>AGCAGCCGCGGTAATACGTAGGGGCAAGCGTTATCCGGATTTACTGGGTGTAAGGGAGCGTAGACGG<br>CACGCAAGCCAGATGTGAAAGCCCGGGGCTCAACCCCGGACTGCATTTGAAACTGTGACTAGAG                                                                                                                                                                        |

|                                |         |                                                                                                                                                                                                                                                                                                                                                                                                                                                                                            |
|--------------------------------|---------|--------------------------------------------------------------------------------------------------------------------------------------------------------------------------------------------------------------------------------------------------------------------------------------------------------------------------------------------------------------------------------------------------------------------------------------------------------------------------------------------|
|                                |         | <p>TGTCGGAGAGGCAAGTGGAAATTCCTAGTGTAGCGGTGAAATGCGTAGATATTAGGAGGAACACCAGTGG<br/>CGAAGGCGGCTTGCTGGACGATGACTGACGTTGAGGCTCGAAAGCGTGGGGAGCAAACAGGATTAGAA<br/>ACCCTAGTAGTC</p>                                                                                                                                                                                                                                                                                                                    |
| Parabacteroid<br>es distasonis | OTU1310 | <p>GTGAGGAATATTGGTCAATGGCCGAGAGGCTGAACCAGCCAAGTCGCGTGAGGGATGAAGGTTCTATGG<br/>ATCGTAAACCTCTTTTATAAGGGAATAAAGTGCGGGACGTGTCCCGTTTTGTATGTACCTTATGAATAAGG<br/>ATCGGCTAACTCCGTGCCAGCAGCCGCGGTAATACGGAGGATCCGAGCGTTATCCGGATTATTGGGTTT<br/>AAAGGGTGCGTAGCGGCCTTTAAGTCAGCGGTGAAAGTCTGTGGCTCAACCATAGAATTGCCGTGA<br/>AACTGGGGGCTTGAGTATGTTTGGGCAGGCGGAATGCGTGGTGTAGCGGTGAAATGCTTAGATATCA<br/>CGCAGAACCCGATTGCGAAGGCAGCCTGCCAAGCCATGACTGACGCTGATGCACGAAAGCGTGGGGA<br/>TCAAACAGGATTAGAAACCCTAGTAGTC</p> |
|                                | OTU420  | <p>GTGAGGAATATTGGTCAATGGCCGAGAGGCTGAACCAGCCAAGTCGCGTGAGGGATGAAGGTTCTATGG<br/>ATCGTAAACCTCTTTTATAAGGGAATAAAGTGCGGGACGTGTCCCGTTTTGTATGTACCTTATGAATAAGG<br/>ATCGGCTAACTCCGTGCCAGCAGCCGCGGTAATACGGAGGATCCGAGCGTTATCCGGATTATTGGGTTT<br/>AAAGGGTGCGTAGCGGCCTTTAAGTCAGCGGTGAAAGTCTGTGGCTCAACCATAGAATTGCCGTGA<br/>AACTGGGGGCTTGAGTATGTTTGGGCAGGCGGAATGCGTGGTGTAGCGGTGAAATGCATAGATATCA<br/>CGCAGAACCCGATTGCGAAGGCAGCCTGCCAAGCCATTACTGACGCTGATGCACGAAAGCGTGGGGAT<br/>CAAACAGGATTAGAAACCCTAGTAGTC</p> |
|                                | OTU1103 | <p>GTGGGAATATTGGTCAATGGCCGAGAGGCTGAACCAGCCAAGTCGCGTGAGGGATGAAGGTTCTATGG<br/>ATCGTAAACCTCTTTTATAAGGGAATAAAGTGCGGGACGTGTCCCGTTTTGTATGTACCTTATGAATAAGG<br/>ATCGGCTAACTCCGTGCCAGCAGCCGCGGTAATACGGAGGATCCGAGCGTTATCCGGATTATTGGGTTT<br/>AAAGGGTGCGTAGCGGCCTTTAAGTCAGCGGTGAAAGTCTGTGGCTCAACCATAGAATTGCCGTGA<br/>AACTGGGGGCTTGAGTATGTTTGGGCAGGCGGAATGCGTGGTGTAGCGGTGAAATGCATAGATATCA<br/>CGCAGAACCCGATTGCGAAGGCAGCCTGCCAAGCCATTACTGACGCTGATGCACGAAAGCGTGGGGAT<br/>CAAACAGGATTAGATACCCTAGTAGTC</p>  |
|                                | OTU899  | <p>GTGAGGAATATTGGTCAATGGCCGTAAGCCTGAACCAGCCAAGTCGCGTGAGGGATGAAGGTTCTATGG<br/>ATCGTAAACCTCTTTTATAAGGGAATAAAGTGCGGGACGTGTCCCGTTTTGTATGTACCTTATGAATAAGG<br/>ATCGGCTAACTCCGTGCCAGCAGCCGCGGTAATACGGAGGATCCGAGCGTTATCCGGATTATTGGGTTT<br/>AAAGGGTGCGTAGCGGCCTTTAAGTCAGCGGTGAAAGTCTGTGGCTCAACCATAGAATTGCCGTGA<br/>AACTGGGGGCTTGAGTATGTTTGGGCAGGCGGAATGCGTGGTGTAGCGGTGAAATGCTTAGATATCA<br/>CGCAGAACCCGATTGCGAAGGCAGCCTGCCAAGCCATGACTGACGCTGATGCACGAAAGCGTGGGGA<br/>TCAAACAGGATTAGAAACCCTAGTAGTC</p> |
| [Ruminococu<br>s]_unc          | OTU1132 | <p>GTGGGAATATTGCACAATGGGGAAACCCTGATGCAGCGACGCCGCGTGAGCGATGAAGTATTCGGT<br/>ATGTAAGCTCTATCAGCAGGGAAGAAAATGACGGTACCTGACTAAGAAGCACC GGCTAAATACGTGCC<br/>AGCAGCCGCGTAATACGTATGGTGCAAGCGTTATCCGATTACTGGGTGTAAGGGAGCGTAGACGG<br/>AGTGGCAAGTCTGATGTGAAAACCCGGGGCTCAACCCGGGACTGCATTGGAACTGTCAATCTAGAGT<br/>ACCGGAGAGGTAAGCGGAATTCCTAGTGTAGCGGTGAAATGCGTAGATATTAGGAGGAACACCAGTGGC<br/>GAAGGCGGCTTACTGGACGTAAGTACTGACGTTGAGGCTCGAAAGCGTGGGGAGCAAACAGGATTAGAAA<br/>CCCTAGTAGTCC</p>                    |
|                                | OTU542  | <p>GTGGGAATATTGCACAATGGGGAAACCCTGATGCAGCGACGCCGCGTGAGCGAAGAAGTATTCGGT<br/>ATGTAAGCTCTATCAGCAGGGAAGAAAATGACGGTACCTGACTAAGAAGCACC GGCTAAATACGTG<br/>CCAGCAGCCGCGTAATACGTATGGTGCAAGCGTTATCCGATTACTGGGTGTAAGGGAGCGTAGACG<br/>GAGTGGCAAGTCTGATGTGAAAACCCGGGGCTCAACCCGGGACTGCATTGGAACTGTCAATCTAGAG<br/>TACCGGAGAGGTAAGCGGAATTCCTAGTGTAGCGGTGAAATGCGTAGATATTAGGAGGAACACCAGTGG<br/>CGAAGGCGGCTTACTGGACGTAAGTACTGACGTTGAGGCTCGAAAGCGTGGGGAGCAAACAGGATTAGAA</p>                                      |



|                            |         |                                                                                                                                                                                                                                                                                                                                                                                                                                                                                 |
|----------------------------|---------|---------------------------------------------------------------------------------------------------------------------------------------------------------------------------------------------------------------------------------------------------------------------------------------------------------------------------------------------------------------------------------------------------------------------------------------------------------------------------------|
|                            |         | ACCCTAGTAGTCC                                                                                                                                                                                                                                                                                                                                                                                                                                                                   |
|                            | OTU800  | GTGGGAATATTGCACAATGGGGAAACCCTGATGCAGCGACGCCGCTGAGCGATGAAGTATTCGGT<br>ATGTAAAGCTCTATCAGCAGGGAAGAAAATGACGGTACCTGACTAAGAAGCACCGGCTAAATACGTGCC<br>AGCAGCCGCGGTAATACGTATGGTGCAAGCGTTATCCGGATTACTGGGTGTAAAGGGAGCGTAGACGG<br>AGAGGCAAGTCTGATGTGAAAACCCGGGCTCAACCCGGGACTGCATTGAAAAGTGTTCCTAGAGT<br>GTCGGAGAGGTAAGTGAATTCTAGTGTAGCGGTGAAATGCGTAGATATTAGGAGGAACACCAGTGGC<br>GAAGGCGGCTTACTGGACGATGACTGACGTTGAGGCTCGAAAGCGTGGGGAGCAAACAGGATTAGAAA<br>CCCTAGTAGTCC                          |
|                            | OTU410  | GTGGGAATATTGCACAATGGGGAAACCCTGATGCAGCGACGCCGCTGAAAGGAAGAAGTATTCGGT<br>ATGTAAACTTCTATCAGCAGGGAAGAAGATGACGGTACCTGACTAAGAAGCACCGGCTAAATACGTGCC<br>AGCAGCCGCGGTAATACGTATGGTGCAAGCGTTATCCGGATTACTGGGTGTAAAGGGAGCGTAGACGG<br>ATAGGCAAGTCTGGAGTGAAAACCCAGGGCTCAACCCGGGACTGCTTTGGAAAAGTGCAGATCTGGAGT<br>GCCGGAGAGGTAAGCGGAATTCTAGTGTAGCGGTGAAATGCGTAGATATTAGGAGGAACACCAGTGGC<br>GAAGGCGGCTTACTGGACGGTACTGACGTTGAGGCTCGAAAGCGTGGGGAGCAAACAGGATTAGAAA<br>CCCTAGTAGTCC                     |
|                            | OTU36   | GTGGGAATATTGCACAATGGGGAAACCCTGATGCAGCGACGCCGCTGAGCGAAGAAGTATTCGGT<br>ATGTAAAGCTCTATCAGCAGGGAAGAACTGACGGTACCTGACTAAGAAGCACCGGCTAAATACGTGCC<br>AGCAGCCGCGGTAATACGTATGGTGCAAGCGTTATCCGGATTACTGGGTGTAAAGGGAGCGTAGACGG<br>ATAGGCAAGTCTGGAGTGAAAACCCGGGCTCAACCCGGGACTGCTTTGGAAAAGTGTTCCTAGAGT<br>GCTGGAGAGGCAAGTGAATTCTAGTGTAGCGGTGAAATGCGTAGATATTAGGAGGAACACCAGTGGC<br>GAAGGCGGCTTCTGGACAGTAACTGACGTTGAGGCTCGAAAGCGTGGGGAGCAAACAGGATTAGATA<br>CCCCAGTAGTCC                           |
| Bifidobacteriu<br>m longum | OTU1160 | GTGGGAATATTGCACAATGGGCACAAGCCTGATGCAGCGACGCCGCTGAGGGATGGAGGCCTTCGGG<br>TTGTAAACCTCTTTATCGGGGAGCAAGCGAGAGTGAAGTTACCCGTTGAATAAGCACCGGCTAACTACG<br>TGCCAGCAGCCGCGGTAATACGTAGGGTGCAAGCGTTATCCGGAATTATTGGGCGTAAAGGGCTCGTAGG<br>CGGTTCTGTCGCGTCCGGTGTGAAAGTCCATCGCTTAACGGTGGATCCGCGCCGGTACGGGCGGGCTTG<br>AGTGCGGTAGGGGAGACTGGAATTCCTGGTGAACGGTGAATGTGTAGATATCGGGAAGAACCACCAAT<br>GGCGAAGGCAGGTCTCTGGCCGTTACTGACGCTGAGGAGCGAAAGCGTGGGGAGCGAACAGGATTAG<br>AAACCCTAGTAGTCC               |
| Veillonela<br>dispar       | OTU1353 | GTGGGAATCTCCGCAATGGACGAAAGTCTGACGGAGCAACGCCGCTGAGTGTGACGGCCTTCGG<br>GTTGTAAAGCTCTGTTAATCGGGACGAAAGGCCTTCTTGCAATAGTTAGAAGGATTGACGGTACCGGA<br>ATAGAAAGCCACGGCTAACTACGTGCCAGCAGCCGCGGTAATACGTAGGTGCAAGCGTTGTCCGGAAT<br>TATTGGGCGTAAAGCGCGCGCAGGCGGATTGGTCAGTCTGTCTTAAAAGTTCGGGGCTTAACCCCGTAT<br>GGGATGAAAAGTCCCAATCTAGATATCGGAGAGGAAAGTGAATTCCTAGTGTAGCGGTGAAATGCGT<br>AGATATTAGGAAGAACCAGTGGCGAAGGCGACTTTCTGGACGAAAAGTACGCTGAGGCGCGAAAAG<br>CCAGGGGAGCGAACGGGATTAGAAAACCTAGTAGTCC |
|                            | OTU681  | GTGGGAATCTCCGCAATGGACGAAAGTCTGACGGAGCAACGCCGCTGAGTGTGACGGCCTTCGG<br>GTTGTAAAGCTCTGTTAATCGGGACGAAAGGCTTCTTGCAATAGTGTGAGGATTGACGGTACCGGAA<br>TAGAAAGCCACGGCTAACTACGTGCCAGCAGCCGCGGTAATACGTAGGTGCAAGCGTTGTCCGGAATT<br>ATTGGGCGTAAAGCGCGCGCAGGCGGATTGGTCAGTCTGTCTTAAAAGTTCGGGGCTTAACCCCGTAT<br>GGGATGAAAAGTCCCAATCTAGATATCGGAGAGGAAAGTGAATTCCTAGTGTAGCGGTGAAATGCGT<br>AGATATTAGGAAGAACCAGTGGCGAAGGCGACTTTCTGGACGAAAAGTACGCTGAGGCGCGAAAAG<br>CCAGGGGAGCGAACGGGATTAGAAAACCTAGTAGTCC   |
| Bacteroides_f              | OTU1298 | GTGAGGAATATTGTCATGGGCGAGAGCCTGAACCAGCCAAGTAGCGTGAAGGATGACTGCCCTATGG                                                                                                                                                                                                                                                                                                                                                                                                             |

|                                 |                |                                                                                                                                                                                                                                                                                                                                                                                                                                                                                                  |
|---------------------------------|----------------|--------------------------------------------------------------------------------------------------------------------------------------------------------------------------------------------------------------------------------------------------------------------------------------------------------------------------------------------------------------------------------------------------------------------------------------------------------------------------------------------------|
| <p>_Bacteroidac<br/>eae_unc</p> |                | <p>GTTGTAAACTTCTTTTATAAAGGAATAAAAGTCGGGTATGGATACCCGTTTGCATGTACTTTATGAATAAGG<br/>ATCGGCTAACTCCGTGCCAGCAGCCCGGTAATACGGAGGATCCGAGCGTTATCCGGATTTACTGGGTGT<br/>AAAGGGTGCCTAGCGCGTCTGGTAAAGTCAGATGTGAAATGTATGGGCTCAACCCATGCCTGCAATTTGA<br/>AACTATTGAGCTTGTAGTGAAGTAGAGGTAGGCGGAATCCCTGTGTAGCGGTGAAATGCGTAGAGATAG<br/>GGAGGAACACCAGTGGCGAAGGCGGCCTACTGGGCTTAACTGACGCTGAGGCACGAAAGCGTGGGTA<br/>GCAAACAGGATTAGAAACCCCTGTAGTCC</p>                                                                         |
|                                 | <p>OTU1296</p> | <p>GTGAGGAATATTGGTCAATGGACGAGAGTCTGAACCAGCCAAGTAGCGTGAAGGATGACTGCCCTATGG<br/>GTTGTAAACTTCTTTTATACGGGAATAAAAGTGGAGTATGCATACTCCTTTGTATGTACCGTATGAATAAGGA<br/>TCGGCTAACTCCGTGCCAGCAGCCCGGTAATACGGAGGATCCGAGCGTTATCCGGATTTACTGGGTGTA<br/>AAGGGAGCGCAGGCGGACTGCAAGTTGGATGTGAAATACCGTGGCTTAAACCAGGAACTGCATCCAA<br/>AACTGTAGTTCTTGTAGTGAAGTAGAGGAAGCGGAATCCGAGTGTAGCGGTGAAATGCGTAGATATCG<br/>GGAGGAACACCAGTGGCGAAGGCGGCCTACTGGGACCAACTGACGCTGAGGCTCGAAAGTGTGGGTA<br/>GCAAACAGGATTAGAAACCCCTAGTAGTCC</p> |
|                                 | <p>OTU400</p>  | <p>GTGGGAATATTGCACAATGGGGAAACCCTGATGCAGCGACCGCGTGAAGGAAGAAGTATCTCGGT<br/>ATGTAAACTTCTATCAGCAGGGAAGATAGTACGGTACCTGACTAAGAAGCCCGGCTAACTACGTGCC<br/>AGCAGCCCGGTAATACGGAGGATCCGAGCGTTATCCGGATTTATTGGGTTAAAGGGAGCGTAGATGGA<br/>TGTTAAGTCAGTTGTGAAAGTTGCGGCTCAACCGTAAATGCAAGTTGATACTGGATATCTTGTAGTGC<br/>AGTTGAGGCAGCGGAATTCGTGTGTAGCGGTGAAATGCTTAGATATCACGAAGAACTCCGATTGCGA<br/>AGGCAGCTGCTAAGCTGCAACTGACATTGAGGCTCGAAAGTGTGGGTATCAAACAGGATTAGAAACCC<br/>TAGTAGTCC</p>                                |
|                                 | <p>OTU69</p>   | <p>GTGGGAATATTGCACAATGGGCACAAGCCTGATGCAGCCATGCCGCGTGTATGAAGAAGGCCTTCGGG<br/>TTGTAAAGTACTTTCAGCGGGGAGGAAGGGAGTAAAGTTAATACTTTGCTCATTGACGTTACCCGAGGA<br/>AGAAGCACCGGCTAACTCCGTGCCAGCAGCCCGGTAATACGGAGGATCCGAGCGTTATCCGGATTTAT<br/>GGGTTAAAGGGAGCGTAGGCGGTTGTAAAGTCAGTTGTGAAAGTTGCGGCTCAACCGTAAATGCA<br/>AGTTGATACTGGCGACCTTGTAGTCAACAGAGGTAGCGGAATTCGTGGTGTAGCGGTGAAATGCTTAG<br/>ATATCACGAAGAACTCCGATTGCGAAGGCAGCTTACTGGATTGTAAGTACGCTGATGCTCGAAAGTGTG<br/>GGTATCAAACAGGATTAGAAACCCCTAGTAGTCC</p>   |
|                                 | <p>OTU887</p>  | <p>GTGAGGAATATTGGTCAATGGACGAGAGTCTGAACCAGCCAAGTAGCGTGAAGGATGACTGCCCTATGG<br/>GTTGTAAACTTCTTTTATACGGGAATAAAAGTGAGGCACGTGTGCCTTTTGTATGTACCGTATGAATAAGG<br/>ATCGGCTAACTCCGTGCCAGCAGCCCGGTAATACGGAGGATCCGAGCGTTATCCGGATTTAATGGGTTT<br/>AAAGGGAGCGTAGGCGGAGATTAAGCGTGTGTGAAATGTAGACGCTCAACGCTGCACTGCAGCGCG<br/>AACTGGTTTCTTGTAGTACGCACAAAGTGGGCGGAATTCGTGGTGTAGCGGTGAAATGCTTAGATATCAC<br/>GAAGAACTCCGATTGCGAAGGCAGCTTGTGACTGTAAGTACGCTGATGCTCGAAAGTGTGGGTATC<br/>AAACAGGATTAGAAACCCAGTAGTCC</p>       |
|                                 | <p>OTU811</p>  | <p>GTGAGGAATATTGGTCAATGGACGAGAGTCTGAACCAGCCAAGTAGCGTGAAGGATGACTGCCCTATGG<br/>GTTGTAAACTTCTTTTATACGGGAATAAAAGTGAGGCACGTGTGCCTTTTGTATGTACCGTATGAATAAGG<br/>ATCGGCTAACTCCGTGCCAGCAGCCCGGTAATACGGAGGATCCGAGCGTTATCCGGATTTACTGGGTGT<br/>AAAGGGAGCGTAGACGGTGTGCAAGTCTGATGTGAAAGGCATGGGCTCAACCTGTGGACTGCATTGG<br/>AACTGTCTACTTGTAGTCCGGAGGGTAAGCGGAATTCCTAGTGTAGCGGTGAAATGCTTAGATATCA<br/>CGAAGAACTCCGATTGCGAAGGCAGCTCACTGGACTGCAACTGACACTGATGCTCGAAAGTGTGGGTAT<br/>CAAACAGGATTAGAAACCCCTGTAGTCC</p>    |
|                                 | <p>OTU742</p>  | <p>GTGAGGAATATTGGTCAATGGTCGGCAGACTGAACCAGCCAAGTCGCGTGAGGGAAGACGGCCCTACG<br/>GGTTGTAAACCTCTTTTGTGCGAGAGTAAAGTACGCTACGCGTAGCGTATTGCAAGTATCCGAAGAAAA<br/>GCATCGGCTAACTCCGTGCCAGCAGCCCGGTAATACGGAGGATGCAGCGTTATCCGGATTTATTGGGT</p>                                                                                                                                                                                                                                                                   |

|         |                                                                                                                                                                                                                                                                                                                                                                                                                                                                                    |
|---------|------------------------------------------------------------------------------------------------------------------------------------------------------------------------------------------------------------------------------------------------------------------------------------------------------------------------------------------------------------------------------------------------------------------------------------------------------------------------------------|
|         | TTAAAGGGAGCGTAGGCGGACGCTTAAGTCAGTTGTGAAAGTTTTCGGCTCAACCGTAAAATTGCAGTT<br>GATACTGGGTGTCTTGAGTACAGTAGAGGCAGGCGGAATTCGTGGTGTAGCGGTGAAATGCTTAGATATC<br>ACGAAGAACTCCGATTGCGAAGGCAGCCTGCTGGACTGTAAGTACGCTGATGCTCGAAAGTGTGGGTA<br>TCAAACAGGATTAGATACCCGAGTAGTCC                                                                                                                                                                                                                           |
| OTU798  | GTGAGGAATATTGGTCAATGGGCGCAGGCCTGAACCAGCCAAGTAGCGTGAAGGATGACTGCCCTATGG<br>GTTGTAAACTTCTTTTATATGGGAATAAAGTTTCCACGTGTGGAATTTGTATGTACCATATGAATAAGGA<br>TCGGCTAACTCCGTGCCAGCAGCCGCGGTAATACGGAGGATCCGAGCGTTATCCGGATTTATTGGGCGTA<br>AAGAGCATGTAGGCGGCTTAATAAGTCGAGCGTGAAAATGCGGGGCTCAACCCCGTATGGCGTGGAAA<br>CTGTTAGGCTTGAGTGCAGGAGAGGAAAGGGGAATCCCAGTGTAGCGGTGAAATGCGTAGATATTGGG<br>AGGAACACCAGTGGCGAAGGCGGCTTGTCTGGACAGTAAGTACGCTTACGCTCGAAAGCGTGGGGAGC<br>AAACAGGATTAGAAACCCCTGTAGTCC   |
| OTU795  | GTGGGAATATTGCACAATGGGCGCAAGCCTGATGCAGCCATGCCCGTGTGTGAAGAAGGCCTTCGGG<br>TTGTAAAGCACTTCAGCGGGGAGGAAGCGTTAAGTTAATAACCTTGGCGATTGACGTTACCCGAG<br>AAGAAGCACC GGCTAACTCCGTGCCAGCAGCCGCGTAATACGGAGGATCCGAGCGTTATCCGGATTTAT<br>TGGGTTTAAAGGAGCGTAGGTGGATTGTTAAGTCAGTTGTGAAAGTTTTCGGCTCAACCGTAAAATTG<br>CAGTTGAAACTGGCAGTCTTGAGTACAGTAGAGGTGGGCGGAATTCGTGGTGTAGCGGTGAAATGCTTA<br>GATATCAGGAAGAACTCCGATTGCGAAGGCAGCTCACTAGACTGTTACTGACACTGATGCTCGAAAGTG<br>TGGGTATCAAACAGGATTAGATACCCAGTAGTCC |
| OTU658  | GTGAGGAATATTGGTCAATGGACGAGAGTCTGAACCAGCCAAGTAGCGTGAAGGATGAAGGTCTACGG<br>ATTGTAAACTTCTTTTATAAGGAATAAACCCTCCACGTGTGGGAGCTTGTATGTACCTTATGAATAAGC<br>ATCGGCTAACTCCGTGCCAGCAGCCGCGTAATACGTAGGGGCAAGCGTTATCCGATTACTGGGTGT<br>AAAGGGAGCGTAGACGGCACGGCAAGCCAGATGTGAAAGCCCGGGCTCAACCCCGGACTGCATTG<br>GAACTGCTGAGCTAGAGTGTTCGGAGAGGCAAGTGAATTCCTAGTGTAGCGGTGAAATGCGTAGATATT<br>AGGAGGAACACCAGTGGCGAAGGCGGCTTGTCTGGACGATGACTGACGTTGAGGCTCGAAAGCGTGGG<br>GAGCAAACAGGATTAGATACCTAGTAGTCC        |
| OTU435  | GTGAGGAATATTGGTCAATGGACGAGAGTCTGAACCAGCCAAGTAGCGTGAAGGATGACTGCCCTATGG<br>GTTGTAAACTTCTTTTATACGGGAATAAAGTCGGGTATGCATACCCGTTTGCATGTACTTTATGAATAAGG<br>ATCGGCTAACTCCGTGCCAGCAGCCGCGTAATACGGAGGATTCGAGCGTTATCCGGATTTATTGGGTTTA<br>AAGGGTGCGTAGGCGGTTGATAAGTTAGAGGTGAAATTCGGGGCTCAACCCGAAACGTGCCTTAATA<br>CTGTTGAGCTAGAGAGTAGTTGCGGTAGGCGGAATGTATGGTGTAGCGGTGAAATGCTTAGAGATCATA<br>AGAACACCGATTGCGAAGGCAGCACACTAATCCGTAAGTACGTTATGCTCGAAAGTGTGGGTATCAA<br>ACAGGATTAGAAACCCAGTAGTCC      |
| OTU1256 | GTGAGGAATATTGGTCAATGGACGAGAGTCTGAACCAGCCAAGTAGCGTGCAGGATGACGGCCCTATGG<br>GTTGTAAACTGCTTTTATAAGGAATAAAGTGTGAGTCTCGTGTAGACTTTTGCATGTACCTTATGAATAAGG<br>ACCGGCTAATCCGTGCCAGCAGCCGCGTAATACGGAAGGTCCGGCGTTATCCGGATTTACTGGGTGT<br>AAAGGGAGCGCAGGCGGTGCGGCAAGTCTGATGTGAAAGCCCGGGCTCAACCCCGTACTGCATTGG<br>AAACTGTCGTACTAGAGTGTTCGGAGGGTAAGCGGAATTCCTAGTGTAGCGGTGA AATGCGTAGATATTA<br>GGAGGAACACCAGTGGCGAAGGCGGCTTACTGGACGATAACTGACGCTGAGGCTCGAAAGCGTGGGGA<br>GCAAACAGGATTAGAAACCCAGTAGTCC  |
| OTU166  | GTGGGAATATTGCACAATGGGCGAAAGCCTGATGCAGCGACGCCGCTGAGCGAAGAAGTATTTCGGT<br>ATGTAAAGCTCTATCAGCAGGGAAGATAATGACGCTACCTGACTAAGAAGCACC GGCTAAATACGTGCC<br>AGCAGCCGCGGTAATACGTATGGTGAAGCGTTATCCGGATTTATTGGGTTTAAAGGAGCGCAGACGGG<br>TCGTTAAGTCAGCTGTGAAAGTTTGGGCTCAACCTTAAAATGCAAGTTGATACTGGCGTCTTGAGTGC<br>GGTTGAGGTGTGCGGAATTCGTGGTGTAGCGGTGAAATGCTTAGATATCAGGAAGAACTCCGATTGCGA                                                                                                             |

|         |                                                                                                                                                                                                                                                                                                                                                                                                                                                                      |
|---------|----------------------------------------------------------------------------------------------------------------------------------------------------------------------------------------------------------------------------------------------------------------------------------------------------------------------------------------------------------------------------------------------------------------------------------------------------------------------|
|         | AGGCAGCACACTAATCCGTAACCTGACGTTTCATGCTCGAAAAGTGTGGGTATCAAACAGGATTAGATACCCGAGTAGTCC                                                                                                                                                                                                                                                                                                                                                                                    |
| OTU635  | GTGAGGAATATTGGTCAATGGGCAGAGCCTGAACCAGCCAAGTAGCGTGAAGGATGAAGGCTCTATGGTTCGTAAACTTCTTTATATGGGAATAAAGTTTCCACGTGTGGAATTTGTATGTACCATATGAATAAGGATCGGCTAACTCCGTGCCAGCAGCCGCGGTAATACGGAGGATCCGAGCGTTATCCGGATTACTGGGTGTA AAGGGCGTGTAGGCGGGATTGCAAGTCAGATGTGAAAAGTGGGGCTCAACCTCCAGCCTGCATTGAA ACTGTAGTTCTTGAGTCTGGAGAGGCAATCGGAATCCGTGTGTAGCGGTGAAATGCGTAGATATTGGG AGGAACACCAGTGGCGAAGGCGCTTCTGGACTGTGTCTGACGCTGAGATGCGAAAAGCCAGGGTAGC GAACGGGATTAGAAAACCTTGTAGTCC              |
| OTU1229 | GTGAGGAATATTGGTCAATGGGCATGGCCTGAACCAGCCAAGTAGCGTGAAGGATGACTGCCCTATGG GTTGTAACCTTCTTTATAAAGGAATAAAGTCGGGTATGCATACCCGTTTGCATGTACTTTATGAATAAGG ATCGGCTAACTCCGTGCCAGCAGCCGCGGTAATACGGAGGATCCGAGCGTTATCCGGATTATTGGGTTT AAAGGGAGCGTAGACGGTGTGCAAGTCTGATGTGAAAGGCATGGGCTCAACCTGTGGACTGCATTGG AAACTGTCATACTTGAGTGCCGGAGGGTAAGCGGAATCCTAGTGTAGCGGTGAAATGCGTAGATATTA GGAGGAACACCAGTGGCGAAGGCGGCTTACTGGACGGTAACTGACGTTGAGGCTCGAAAAGCGTGGGGA GCAAACAGGATTAGATACCTTGTAGTCC        |
| OTU1278 | GTGGGAATATTGCACAATGGGGAAACCCTGATGCAGCAACGCCGCGTGAAGGATGACGGTTTTCCGGA TTGTAAACTTCTTTCTTAGTGACGAAGACAGTGACGGTAGCTAAGGAATAAGCATCGGCTAACTACGTG CCAGCAGCCGCGTAATACGTAGGATGCAAGCGTTATCCGGATTATTGGGTTAAAGGGAGCGTAGGGC GGTGTTAAAGTCAGTTGTGAAAGTTTGGCGCTCAACCGTAAAATTGCAGTTGATACTGGCGACCTTGAGT GCAACAGAGGTAGGCGGAATTCGTGGTGTAGCGGTGAAATGCTTAGATATCACGAAGAACTCCGATTGC GAAGGCAGCTTACTGGATTGTAAGTACGCTGATGCTCGAAAAGTGTGGGTATCAAACAGGATTAGAAAC CCGAGTAGTCC                        |
| OTU810  | GTGGGAATATTGCACAATGGGCACAAGCCTGATGCAGCCATGCCGCGTGTATGAAGAAGGCTTCGGG TTGTAAAGTACTTTCAGCGGGGAGGAAGGGAGTAAAGTTAATACCTTTGCTCATTGACGTTACCCGCAGA AGAAGCACCGGCTAACTCCGTGCCAGCAGCCGCGGTAATACGGAGGATCCGAGCGTTATCCGGATTATT GGGTTAAAGGGAGCGTAGGTGGACTGGTAAGTCAAGTGTGAAAGTTTGGCGCTCAACCGTAAAATTGC AGTTGATACTGTCAGTCTTGAGTACAGTAGAGGTGGCGGAATTCGTGGTGTAGCGGTGAAATGCTTAGA TATCACGAAGAACTCCGATTGCGAAGGCAGCTCACTGGACTGCAACTGACACTGATGCTCGAAAAGTGTG GGTATCAAACAGGATTAGAAAACCTAGTAGTCC |
| OTU820  | GTGAGGAATATTGGTCAATGGACGAGAGTCTGAACCAGCCAAGTAGCGTGAAGGATGACTGCCCTATGG GTTGTAACCTTCTTTATACGGGAATAAAGTGAGGCACGTGTGCCTTTTGTATGTACCGTATGAATAAGG ATCGGCTAACTCCGTGCCAGCAGCCGCGGTAATACGGAGGATCCGAGCGTTATCCGGATTATTGGGTGT AAAGGGAGCGTAGACGGTTTTGCAAGTCTGAAGTGAAGCCGGGGCTTAAACCCGGGACTGCTTGG AAACTGTAGGACTAGAGTGCAGGAGAGGTAAGTGAATCCTAGTGTAGCGGTGAAATGCGTAGATATT AGGAGGAACACCAGTGGCGAAGGCGGCTTACTGGACTGTAAGTACGCTTGAGGCTCGAAAAGCGTGGGG AGCAAACAGGATTAGAAAACCCGAGTAGTCC        |
| OTU1333 | GTGAGGAATATTGGTCAATGGACGAGAGTCTGAACCAGCCAAGTAGCGTGCAGGATGACGGCCCTATGG GTTGTAACCTGCTTTATAAGGGAATAAAGTGAGTCTCGTGAGACTTTTGCATGTACCTTATGAATAAGG ACCGGCTAATCCGTGCCAGCAGCCGCGGTAATACGGAAGGTCCGGCGTTATCCGGATTACTGGGTGT AAAGGGAGCGTAGACGGTGTGCAAGTCTGATGTGAAAGGCATGGGCTCAACCTGTGGACTGCATTGG AAACTGTCATACTTGAGTGCCGGAGGGTAAGCGGAATCCTAGTGTAGCGGTGAAATGCGTAGATATTA GGAGGAACACCAGTGGCGAAGGCGGCTTACTGGACGGTAACTGACGTTGAGGCTCGAAAAGCGTGGGGA GCAAACAGGATTAGAAAACCCGAGTAGTCC        |

|                     |         |                                                                                                                                                                                                                                                                                                                                                                                                                                                                                  |
|---------------------|---------|----------------------------------------------------------------------------------------------------------------------------------------------------------------------------------------------------------------------------------------------------------------------------------------------------------------------------------------------------------------------------------------------------------------------------------------------------------------------------------|
|                     | OTU1247 | GTGGGAATATTGCACAATGGGCAGAGCCTGATGCAGCGACGCCCGTGAGCGAAGAAGTATTCGGT<br>ATGTAAAGCTCTATCAGCAGGGAAGATAATGACGGTACCTGACTAAGAAGCACCAGGCTAAATACGTGCC<br>AGCAGCCCGGTAATACGGAGGATCCGAGCGTTATCCGGATTATTGGGTTAAAGGGAGCGTAGATGGA<br>TGTTAAGTCAGTTGTGAAAGTTGCGGCTCAACCGTAAAATTGCAGTTGATACTGGATATCTTGAGTGC<br>AGTTGAGGCAGCGGAATTCGTGGTGTAGCGGTGAAATGCTTAGATATCACGAAGAAGTCCGATTGCGA<br>AGGCAGCCTGCTAAGCTGCAACTGACATFGAGGCTCGAAAGTGTGGGTATCAAACAGGATTAGAAACCC<br>TAGTAGTCC                         |
|                     | OTU219  | GTGAGGAATATTGGTCAATGGGCAGAGCCTGAACCAGCCAAGTAGCGTGAAGGATGACTGCCCTATGG<br>GTTGTAAACTTCTTTTATAAGGAATAAAGTCGGGTATGGATACCCGTTTGCATGTACTTTATGAATAAGG<br>ATCGGCTAACTCCGTGCCAGCAGCCCGGTAATACGTAGGGGGCAAGCGTTATCCGGATTACTGGGTGT<br>AAAGGGAGCGTAGACGGCAAGCAAGTCTGAAAGTAAAACCCAGGGCTCAACCCGTTGGACTGCTTTGG<br>AAACTGTTTTGCTAGAGTGTCCGAGAGGTAAGTGAATTCCTAGTGTAGCGGTGAAATGCGTAGATATTA<br>GGAGAACACCAGTGGCGAAGGCGGCTTACTGGACGATAACTGACGTTGAGGCTCGAAAGCGTGGGGA<br>GCAAACAGGATTAGAAACCCCTAGTAGTCC |
|                     | OTU621  | GTGAGGAATATTGGTCAATGGACGCAAGTCTGAACCAGCCATGCCGCTGCAGGATGACGGCTCTATGA<br>GTTGTAAACTGCTTTTGTACGAGGGTAAACGCAGATACGTGTATCTGCTGAAAATATCGTACGAATAAG<br>GATCGGCTAACTCCGTGCCAGCAGCCCGGTAATACGGAGGATTCAAGCGTTATCCGGATTATTGGGTT<br>TAAAGGGAGCGTAGGCGGACGCTTAAGTCAGTTGTGAAAGTTGCGGCTCAACCGTAAAATTGCAGTTG<br>ATACTGGGTGCTTAGATACAGTAGAGGCAGCGGAATTCGTGGTGTAGCGGTGAAATGCTTAGATATCA<br>CGAAGAAGTCCGATTGCGAAGGCGGCTTACTGGACTGTAAGTACGCTGATGCTCGAAAGTGTGGGTAT<br>CAAACAGGATTAGATACCCCTGTAGTCC    |
|                     | OTU1383 | GTGAGGAATATTGGTCAATGGACGAGAGTCTGAACCAGCCAAGTAGCGTGAAGGATGAAGTCTACGG<br>ATTGTAAACTTCTTTTATAAGGAATAAAACCTCCACGTTGGGAGCTTGTATGTACTTATGAATAAGC<br>ATCGGCTAACTCCGTGCCAGCAGCCCGGTAATACGGAGGATGCGAGCGTTATCCGGATTATTGGGTGT<br>AAAGGGAGCGCAGCGGTGCGCAAGTCTGATGTGAAAGCCCGGGCTCAACCCCGTACTGCATTGG<br>AAACTGCTGACTAGAGTGTCCGAGGGTAAGCGGAATTCCTAGTGTAGCGGTGAAATGCGTAGATATTA<br>GGAGAACACCAGTGGCGAAGGCGGCTTACTGGACGATAACTGACGCTGAGGCTCGAAAGCGTGGGGA<br>GCAAACAGGATTAGAAACCCCTGTAGTCC           |
|                     | OTU641  | GTGAGGAATATTGGTCAATGGGCAGAGCCTGAACCAGCCAAGTAGCGTGAAGGATGACTGCCCTATGG<br>GTTGTAAACTTCTTTTATAAGGAATAAAGTCGGGTATGGATACCCGTTTGCATGTACTTTATGAATAAGG<br>ATCGGCTAACTCCGTGCCAGCAGCCCGGTAATACGGAGGATCCGAGCGTTATCCGGATTACTGGGTGT<br>AAAGGGAGCGTAGACGGTAAAGCAAGTCTGAAAGTAAAAGCCCGGGCTCAACCCCGGACTGCTTTGG<br>AAACTGTTAACTAGAGTGTGGAGAGGTAAGCGGAATTCCTAGTGTAGCGGTGAAATGCGTAGATATTA<br>GGAGAACACCAGTGGCGAAGGCGGCTTACTGGACGATAACTGACGTTGAGGCTCGAAAGCGTGGGGA<br>GCAAACAGGATTAGAAACCCCTGTAGTCC    |
|                     | OTU643  | GTGAGGAATATTGGTCAATGGACGAGAGTCTGAACCAGCCAAGTAGCGTGAAGGATGACTGCCCTATGG<br>GTTGTAAACTTCTTTTATACGGGAATAAAGTGAGGCACGTGTGCCTTTTGTATGTACCGTATGAATAAGG<br>ATCGGCTAACTCCGTGCCAGCAGCCCGGTAATACGGAGGATCCGAGCGTTATCCGGATTACTGGGTGT<br>AAAGGGAGCGTAGACGGCAAGCAAGTCTGAAAGTAAAACCCAGGGCTTAAACCCGTTGGACTGCATTGG<br>AAACTGTCTGGCTCGAGTCCCGAGAGGTAAGCGGAATTCCTAGTGTAGCGGTGAAATGCGTAGATATTA<br>GGAAGAACCAGTGGCGAAGGCGGCTTACTGGACGTAAGTACGTTGAGGCTCGAAAGCGTGGGGA<br>GCAAACAGGATTAGATACCCCTGTAGTCC   |
| Odoribacter_u<br>nc | OTU882  | GTGAGGAATATTGGTCAATGGACGTAAGTCTGAACCAGCCAAGTAGCGTGAAGGATGACTGCCCTATGG<br>GTTGTAAACTTCTTTTATAAGGAAGAATAAAGTCTACGTGAGAATGATGCCTGTACTTATGAATAAGC                                                                                                                                                                                                                                                                                                                                    |

|                            |         |                                                                                                                                                                                                                                                                                                                                                                                                                                                                                  |
|----------------------------|---------|----------------------------------------------------------------------------------------------------------------------------------------------------------------------------------------------------------------------------------------------------------------------------------------------------------------------------------------------------------------------------------------------------------------------------------------------------------------------------------|
|                            |         | ATCGGCTAACTCCGTGCCAGCAGCCGCGTAATACGGAGGATGCGAGCGTTATCCGGATTATTGGGTTT<br>AAAGGGTGCGTAGGCGGTTTATTAAGTTAGTGGTTAAATATTTGAGCTAAACTCAATTGTCCATTAATAC<br>TGGTAAACTGGAGTACAGACGAGGTAGGCGGAATAAGTTAAGTAGCGGTGAAATGCATAGATATACTTA<br>GAACTCCGATAGCGAAGGCAGCTTACCAGACTGTAAGTACGCTGATGCACGAGAGCGTGGGTAGCGA<br>ACAGGATTAGAAACCCTAGTAGTCC                                                                                                                                                      |
|                            | OTU1258 | GTGAGGAATATTGGTCAATGGGCGGAAGCCTGAACCAGCCAAGTCGCGTGAGGGAAGACTGCCCTATGG<br>GTTGTAAACCTCTTTTGTAAAGGAAGAATAATGGCTACGTGTAGCCAGATGCCTGTACCTTACGAATAAG<br>CATCGGCTAACTCCGTGCCAGCAGCCGCGTAATACGGAGGATGCGAGCGTTATCCGGATTATTGGGTT<br>TAAAGGGTGCGTAGGCGGTCTGTAAAGTTAGTGGTTAAATTTCCGGGCTTACCCCGTCCATGCCATTAATA<br>CTGGTGGACTCGAGTACAGACGAGGTAGGCGGAATAAGTTAAGTAGCGGTGAAATGCATAGATATACTT<br>AGAACTCCGATAGCGAAGGCAGCTTACCAGACTGTAAGTACGCTGATGCACGAGAGCGTGGGTAGCA<br>AACAGGATTAGATACCCTGGTAGTCC |
|                            | OTU1231 | GTGAGGAATATTGGTCAATGGGCGCAAGCCTGAACCAGCCAAGTCGCGTGAAAGGATGACTGCCCTATGG<br>GTTGTAAACCTCTTTTGTAAAGGAGAAACCGGATTACGTGTAATCCGTTGACAGTACATTACGAATAAGC<br>ATCGGCTAACTCCGTGCCAGCAGCCGCGTAATACGGAGGATGCGAGCGTTATCCGGATTATTGGGTTT<br>AAAGGGTGCGTAGGCGGTTTGTAAAGTTAGTGGTCAAATGTCATGGCTTAACTTGGCTTGCATTAATA<br>CTGCAGGACTCGAGTACAGACGAGGTAGGCGGAATAAGTTAAGTAGCGGTGAAATGCATAGATATACTT<br>AGAACTCCGATAGCGAAGGCAGCTTACCAGACTGTAAGTACGCTGATGCACGAGAGCATGGGTAGCGA<br>ACAGGATTAGATACCCTTGTAGTCC   |
| Enterobacteria<br>ceae_unc | OTU555  | GTGAGGAATATTGGTCAATGGGCGCAAGCCTGAACCAGCCAAGTCGCGTGAAAGGATGACTGCCCTATGG<br>GTTGTAAACCTCTTTTGTAAAGGAGAAACCGGATTACGTGTAATCCGTTGACAGTACATTACGAATAAGC<br>ATCGGCTAACTCCGTGCCAGCAGCCGCGTAATACGGAGGATGCGAGCGTTATCCGGATTATTGGGTTT<br>AAAGGGTGCGTAGGCGGTTTGTAAAGTTAGTGGTCAAATGTCATGGCTTAACTTGGCTTGCATTAATA<br>CTGCAGGACTCGAGTACAGACGAGGTAGGCGGAATAAGTTAAGTAGCGGTGAAATGCATAGATATACTT<br>AGAACTCCGATAGCGAAGGCAGCTTACCAGACTGTAAGTACGCTGATGCACGAGAGCATGGGTAGCGA<br>ACAGGATTAGATACCCTTGTAGTCC   |
|                            | OTU654  | GTGGGGAATTTGGACAATGGGCGCAAGCCTGATCCAGCTATTCGCGGTGGGATGACGGCCTTCGGG<br>TTGTAAACCCTTTTGTAGAGAACGAAAAGTCTGTTGATAATACCACAGATGATGACGGTACTCTAAGA<br>ATAAGCACC GGCTAATACGTGCCAGCAGCCGCGTAATACGTAGGGTGCAGCGTTAATCGGAATTACT<br>GGGCGTAAAGCGCACGAGCGGTTTGTAAAGTACAGATGTGAAATCCCGGGCTCAACCTGGGAACTGC<br>ATCTGATACTGGCAAGCTTGTCTCTAGAGGGGGTAGAATTCCAGGTGATGCGGTGAAATGCGTAG<br>AGATCTGGAGGAATACCGGTGGCGAAGGCGGCCCTGGACGAAGACTGACGCTCAGGTGCGAAAGCG<br>TGGGGAGCAAACAGGATTAGAAACCCTAGTAGTCC      |
|                            | OTU260  | GTGGGGAATATTGACAATGGGCGAAAGCCTGATGCAGCAACGCCGCGTGAGTGAAGAAGTATCTCGGT<br>ATGTAAAGCTCTATCAGCAGGGAAGAAAATGACGGTACCTGACTAAGAAGCACCGGCTAACTCCGTGCC<br>AGCAGCCGCGTAATACGGAGGGTCAAGCGTTAATCGGAATTACTGGGCGTAAAGCGCACGAGGCGG<br>TTTGTAAAGTACAGATGTGAAATCCCGGGCTCAACCTGGGAACTGCATCTGATACTGGCAAGCTTGTGTC<br>TCGTAGAGGGGGTAGAATCCAGGTGTAGCGGTGAAATGCGTAGAGATCTGGAGGAATACCGGTGGCG<br>AAGGCGGCCCTGGACGAAGACTGACGCTCAGGTGCGAAAGCGTGGGGAGCAAACAGGATTAGAAA<br>CCCGAGTAGTCC                        |
|                            | OTU1046 | GTGGGGAATATTGACAATGGGCGCAAGCCTGATGCAGCCATGCCGCGTGTATGAAGAAGCCTTCGGG<br>TTGTAAAGTACTTTCAGCGGGGAGGAAGGTGTTGAGGTTAATAACCTCAGCAATTGACGTTACCCGCGAG<br>AAGAAGCACCGGCTAACTCCGTGCCAGCAGCCGCGTAATACGGAGGGTCAAGCGTTAATCGGAATTA<br>CTGGGCGTAAAGCGCACGAGCGGTTCTCAAGTCCGATGTGAAATCCCGGGCTCAACCTGGGAACT                                                                                                                                                                                        |

|                       |         |                                                                                                                                                                                                                                                                                                                                                                                                                                                                                  |
|-----------------------|---------|----------------------------------------------------------------------------------------------------------------------------------------------------------------------------------------------------------------------------------------------------------------------------------------------------------------------------------------------------------------------------------------------------------------------------------------------------------------------------------|
|                       |         | GCATTCGAAACTGGCAGGCTAGAGTCTTGTAAGGGGGGTAGAATCCAGGTGTAGCGGTGAAATGCGT<br>AGAGATCTGGAGGAATACCGGTGGCGAAGGCGGCCCCCTGGACAAAGACTGACGCTCAGGTGCGAAAG<br>CGTGGGGAGCAAACAGGATTAGAAACCCTAGTAGTCC                                                                                                                                                                                                                                                                                             |
|                       | OTU834  | GTGGGAATATTGCAATGGGCACAAGCCTGATGCAGCCATGCCGCGTGTATGAAGAAGCCTTCGGG<br>TTGTAAAGTACTTTCAGCGGGGAGGAAGGGAGTAAAGTTAATACCTTTGCTCATTGACGTTACCCGAGAG<br>AGAAGCACCGGCTAACTCCGTGCCAGCAGCCGCGTAATACGGAGGGTGAAGCGTTAATCGGAATTAC<br>TGGGCGTAAAGCGTGCAGCGGTTCTGTAAAGACAGATGTAAATCCCCGGGCTCAACCTGGGAATTG<br>CATTGTGACTGCAGGACTAGAGTTCATCAGAGGGGGTGAATTCCAAGTGTAGCAGTGAATGCGTA<br>GAGATCTGGAGGAATACCGGTGGCGAAGGCGGCCCCCTGGACGAAGACTGACGCTCAGGTGCGAAAGC<br>GTGGGGAGCAAACAGGATTAGAAACCCTGTAGTCC     |
| Butyricimonas<br>_unc | OTU1009 | GTGAGGAATATTGGTCAATGGGCAGAGCCTGAACCAGCCAAGTCGCGTGAGGGAAGAATGGTCTATGG<br>CCTGTAAACCTCTTTTGTCAAGGAAGAATAAGGATGACGAGTTCATCGATGCCAGTACTTGACGAATAAG<br>CATCGGCTAACTCCGTGCCAGCAGCCGCGTAATACGGGGGATGCGAGCGTTATCCGGATTATTGGGTT<br>TAAAGGGCGCGTAGGCGGGACGTCAAGTCAGCGGTAAAAGACTGCAGCTAAACTGTAGCACGCCGTTG<br>AAACTGGCGCCCTGGAGACGAGACGAGGGAGGCGGAACAAGTGAAGTAGCGGTGAAATGCATAGATAT<br>CACTTGGAACCCCGATAGCGAAGGCAGCTTCCAGGCTCGTTCTGACGCTGATGCGCGAGAGCGTGGGT<br>AGCGAACAGGATTAGAAACCCTAGTAGTCC |
|                       | OTU213  | GTGAGGAATATTGGTCAATGGGCAGAGCCTGAACCAGCCAAGTCGCGTGAGGGAAGAATGGTCCATGG<br>CCTGTAAACCTCTTTTGTCAAGGAAGAATAAGGATGACGAGTTCATCGATGCCAGTACTTGACGAATAAG<br>CATCGGCTAACTCCGTGCCAGCAGCCGCGTAATACGGGGGATGCGAGCGTTATCCGGATTATTGGGTT<br>TAAAGGGCGCGTAGGCGGGACGCAAGTCAGCGGTAAAAGACTGCAGCTAAACTGTAGCACGCCGTTG<br>AAACTGGCGACCTGGAGACGAGACGAGGGAGGCGGAACAAGTGAAGTAGCGGTGAAATGCTTAGATAT<br>CACTTGGAACCCCGATAGCGAAGGCAGCTTCCAGGCTCGATCTGACGCTGATGCGCGAGAGCGTGGGT<br>AGCGAACAGGATTAGAAACCCTAGTAGTCC  |
|                       | OTU772  | GTGAGGAATATTGGTCAATGGGCAGAGCCTGAACCAGCCAAGTCGCGTGAGGGAAGAATGGTCTATGG<br>CCTGTAAACCTCTTTTGTCAAGGAAGAATAAGGATGACGAGTTCATCGATGCCAGTACTTGACGAATAAG<br>GCATCGGCTAACTCCGTGCCAGCAGCCGCGTAATACGGGGGATGCGAGCGTTATCCGGATTATTGGGTT<br>TTAAAGGGCGCGTAGGCGGGATGCCAAGTCAGCGGTAAAAGACTGCAGCTAAACTGTAGCACGCCGTTG<br>AAACTGGTACCTCGAGACGAGTCGAGGATGGCGGAACAAGTGAAGTAGCGGTGAAATGCTTAGATATC<br>ACTTGGAACCCCGATAGCGAAGGCAGCTTCCAGACTCGATCTGACGCTGATGCGCGAGAGCGTGGGT<br>GCGAACAGGATTAGAAACCCTAGTAGTCC |
|                       | OTU897  | GTGAGGAATATTGGTCAATGGTCGAGAGACTGAACCAGCCAAGTCGCGTGAGGGAAGAAGCGGTCCATG<br>ACCTGTAAACCTCTTTTCCCGGAAGAACAAGTCGCACGAGTGCACCTGCCAGTACCGGGCGAATA<br>AGCATCGGCTAACTCCGTGCCAGCAGCCGCGTAATACGGGGGATGCGAGCGTTATCCGGATTATTGGG<br>TTTAAAGGGCGCGTAGGCGGGCGTCAAGTCAGCGGTAAAAGCCTGCAGCTAAACTGTAGCACGCCGTT<br>GAAACTGCCCTCCTAGAGACGAGACGAGGGAGGCGGAACAAGTGAAGTAGCGGTGAAATGCATAGATA<br>TCACTTGGAACCCCGATAGCGAAGGCAGCTTCCAGGCTCGTCTGACGCTGATGCGCGAGAGCGTGGG<br>TAGCGAACAGGATTAGAAACCCTAGTAGTCC     |
|                       | OTU909  | GTGAGGAATATTGGTCAATGGGCAGAGCCTGAACCAGCCAAGTCGCGTGAGGGAAGAATGGTCTATGG<br>CCTGTAAACCTCTTTTACGAGAGAAGAATAAGAAGCAGCGTCTTTGATGCCAGTATCTCGTAATAAG<br>CATCGGCTAACTCCGTGCCAGCAGCCGCGTAATACGGGGGATGCGAGCGTTATCCGGATTATTGGGTT<br>TAAAGGGCGCGTAGGCGGGACGCAAGTCAGCGGTAAAAGACTGCAGCTAAACTGTAGCACGCCGTTG<br>AAACTGGCGCCCTAGAGAGAAGTCGAGGGAGGCGGAACAAGTGAAGTAGCGGTGAAATGCATAGATAT<br>CACTTGGAACCCCGATAGCGAAGGCAGCTTCCAGCCTTTATCTGACGCTGATGCGCGAGAGCGTGGGT                                       |

|                                         |         |                                                                                                                                                                                                                                                                                                                                                                                                                                                                                   |
|-----------------------------------------|---------|-----------------------------------------------------------------------------------------------------------------------------------------------------------------------------------------------------------------------------------------------------------------------------------------------------------------------------------------------------------------------------------------------------------------------------------------------------------------------------------|
|                                         |         | AGCGAACAGGATTAGAAACCTAGTAGTCC                                                                                                                                                                                                                                                                                                                                                                                                                                                     |
|                                         | OTU704  | GTGAGGAATATTGGTCAATGGGCGGAAGCCTGAACCAGCCAAGTCGCGTGAGGGATGACGGGTCCATGG<br>CCTGTAAACCTCTTTGTGAAGGAAGAACCAGCGGGGACGTGTCCCGCCTGCCAGTACTTCACGAATAA<br>GCATCGGCTAACTCCGTGCCAGCAGCCGCGGTAACACGGGGGATGCGAGCGTTATCCGGATTATTGGGT<br>TTAAAGGGAGCGTAGGCGGCCGACAAGTCAGCGGTAAAAGACTGCAGCTAAACTGTAGCGCCGCTT<br>GAAACTGCCGGGCTAGAGTGCAGACGAGGTTGGCGGAACAGGTGAAGTAGCGGTGAAATGCATAGATA<br>TCACCTGGAACCCCGACAGCGAAGGCAGCTGACCAGGCTGTAACTGACGCTGATGCTCGAGAGCGTGG<br>GTAGCGAACAGGATTAGAAACCTTGTAGTCC   |
|                                         | OTU51   | GTGAGGAATATTGGTCAATGGGCGAGAGCCTGAACCAGCCAAGTCGCGTGAGGGAAGAATGGTCTATGG<br>CCTGTAAACCTCTTTGTCAAGGAAGAATAAGCGGCACGAGTGCCACCTTGCCAGTACTTGACGAATAA<br>GCATCGGCTAACTCCGTGCCAGCAGCCGCGGTAATACGGGGGATGCGAGCGTTATCCGGATTATTGGGT<br>TTAAAGGGCGCGTAGGCGGGACGGCAAGTCAGCGGTAAAAGACTGCAGCTAAACTGTAGCACGCCGCTT<br>GAAACTGTGACCTGGAGACGAGACGAGGGAGGCGGAACAAGTGAAGTAGCGGTGAAATGCATAGATA<br>TCACTTGGAACCCCGATAGCGAAGGCAGCTTCCAGGCTCGGTCTGACGCTGATGCGCGAGAGCGTGGG<br>TAGCGAACAGGATTAGAAACCCGAGTAGTCC |
|                                         | OTU6    | GTGAGGAATATTGGTCAATGGGCGAGAGCCTGAACCAGCCAAGTCGCGTGAGGGAAGAATGGTCTATGG<br>CCTGTAAACCTCTTTGTCAAGGAAGAATAAGCGGCACGAGTGCCACCTTGCCAGTACTTGACGAATAA<br>GCATCGGCTAACTCCGTGCCAGCAGCCGCGGTAATACGGGGGATGCGAGCGTTATCCGGATTATTGGGT<br>TTAAAGGGCGCGTAGGCGGGACGGCAAGTCAGCGGTAAAAGACTGCAGCTAAACTGTAGCACGCCGCTT<br>GAAACTGTGACCTGGAGACGAGACGAGGGAGGCGGAACAAGTGAAGTAGCGGTGAAATGCATAGATA<br>TCACTTGGAACCCCGATAGCGAAGGCAGCTTCCAGGCTCGGTCTGACGCTGATGCGCGAGAGCGTGGG<br>TAGCGAACAGGATTAGAAACCTAGTAGTCC  |
|                                         | OTU1337 | GTGAGGAATATTGGTCAATGGGCGGAAGCCTGAACCAGCCAAGTCGCGTGAGGGAAGAATGGTCTATGG<br>CCTGTAAACCTCTTTGAAAGGGAAGAATAAGTGGCACGTGTGCCATGATGCCAGTACTTTCGAATAAG<br>CATCGGCTAACTCCGTGCCAGCAGCCGCGGTAACACGGGGGATGCGAGCGTTATCCGGATTATTGGGT<br>TAAAGGGCGCGTAGGCGGGATGCCAAGTCAGCGGTAAAAGACTGCAGCTAAACTGTAGCACGCCGCTT<br>AAACTGGTGACCTAGAGAGAAGTCGAGGGAGGCGGAACAAGTGAAGTAGCGGTGAAATGCTTAGATAT<br>CACTTGGAACCCCGATAGCGAAGGCAGCTTCCAGTCTTTGTCTGACGCTGATGCGCGAGAGCGTGGGT<br>AGCGAACAGGATTAGATAACCTTGTAGTCC   |
|                                         | OTU417  | GTGAGGAATATTGGTCAATGGGCGAGAGCCTGAACCAGCCAAGTCGCGTGAGGGATGAATGGTCCATGG<br>CCTGTAAACCTCTTTGTCAAGGAAGAATAAATTGCAGTGTGCGATCTGCCAGTACTTGACGAATAAG<br>CATCGGCTAACTCCGTGCCAGCAGCCGCGGTAATACGGGGGATGCGAGCGTTATCCGGATTATTGGGT<br>TAAAGGGCGCGTAGGCGGGACGCCAAGTCAGCGGTAAAAGACTGCAGCTAAACTGTAGCACGCCGCTT<br>AAACTGGCGCCCTCGAGACGAGACGAGGGAGGCGGAACAAGTGAAGTAGCGGTGAAATGCTTAGATAT<br>CACTTGGAACCCCGATAGCGAAGGCAGCTTCCAGGCTCGATCTGACGCTGATGCGCGAGAGCGTGGGT<br>AGCGAACAGGATTAGAAACCTAGTAGTCC     |
| Bacteroidales<br>_c_Bacteroid<br>ia_unc | OTU35   | GTGAGGAATATTGGTCAATGGACGAGAGTCTGAACCAGCCAAGTAGCGTGCAGGATGACGGCCCTATGG<br>GTTGTAAACTGCTTTTATAAGGGAATAAAGTGAGTCTCGTGAGACTTTTGCATGTACCTTATGAATAAGG<br>ACCGGCTAATCCGTGCCAGCAGCCGCGGTAATACGGAAGGTCCGGCGTATCCGGATTATTGGGT<br>AAAGGGAGCGCAGACGGGCTGTTAAGTCAGCTGTGAAAGTTGGGGCTCAACCTAAAATTGCAGTTG<br>ATACTGGCGTCTTGTAGTGCAGTTGAGGTGTGCGGAATTCGTGGTGTAGCGGTGAAATGCTTAGATATCA<br>CGAAGAACTCCGATTGCGAAGGCAGCACACTAATCCGTAAGTACGCTTATGCTCGAAAGTGTGGGTAT<br>CAAACAGGATTAGAAACCTAGTAGTCC        |
|                                         | OTU691  | GTGAGGAATATTGGTCAATGGACGAGAGTCTGAACCAGCCAAGTAGCGTGCAGGATGACGGCCCTATGG                                                                                                                                                                                                                                                                                                                                                                                                             |



|         |                                                                                                                                                                                                                                                                                                                                                                                                                                                                                                     |
|---------|-----------------------------------------------------------------------------------------------------------------------------------------------------------------------------------------------------------------------------------------------------------------------------------------------------------------------------------------------------------------------------------------------------------------------------------------------------------------------------------------------------|
|         | <p>GTTGTAAACTGCTTTTATAAGGGAATAAAGTGAGTCTCGTGAGACTTTTTGCATGTACCTTATGAATAAGG<br/> ACCGGCTAATCCGTGCCAGCAGCCCGGTAATACGGAAGGTCCGGCGTTATCCGGATTTATTGGGTTT<br/> AAAGGGAGCGTAGGTGGATTGTTAAGTCAGTTGTGAAAGTTTGGCGCTCAACCGTAAAATTGCAGTTGA<br/> AACTGGCAGTCTTGAGTACAGTAGAGGTGGCGGAATTCGTGGTGTAGCGGTGAAATGCTTAGATATCAC<br/> GAAGAACTCCGATTGCGAAGGCAGCTCACTAGACTGCAACTGACACTGATGCTCGAAAGTGTGGGTATC<br/> AAACAGGATTAGATACCCGAGTAGTCC</p>                                                                           |
| OTU746  | <p>GTGAGGAATATTGGTCAATGGACGCAAGTCTGAACCAGCCATGCCGCTGCAGGATGACGGCTCTATGA<br/> GTTGTAAACTGCTTTTGTACGAGGGTAAACGCAGATACGTGTATCTGTCTGAAAGTATCGTACGAATAAG<br/> GATCGGCTAATCCGTGCCAGCAGCCCGGTAATACGGAGGATTCAAGCGTTATCCGGATTTATTGGGTT<br/> TAAAGGGAGCGCAGGCCGTCTTTAAGCGTGTGTGAAATGCCCGGGCTCAACCGTGGCACTGCAGCGC<br/> GAACTGGAGGACTTGAGTACGCACGAGGTAGGCAGGAAATTCGTGGTGTAGCGGTGAAATGCTTAGATATC<br/> ACGAAGAACTCCGATTGCGAAGGCAGCTTACCGGAGCGCAACTGACGCTGAGGCTCGAAAGCGGGGT<br/> ATCGAACAGGATTAGAAACCTAGTAGTCC</p> |
| OTU980  | <p>GTGAGGAATATTGGTCAATGGACGAGAGTCTGAACCAGCCAAGTAGCGTGAAGGATGAAGTCTACCG<br/> ATTGTAAACTTCTTTTATAAGGGAATAAACCTCCACGTGTGGGAGCTTGTATGTACCTTATGAATAAGC<br/> ATCGGCTAATCCGTGCCAGCAGCCCGGTAATACGGAGGATGCGAGCGTTATCCGGATTTATTGGGTTT<br/> AAAGGGAGCGTAGGGGGCTTTAAGTCAGCGGTCAAATGCCACGGCTCAACCGTGGCAGCCGTTGA<br/> AACTGCAAGCCTTGAGTCTGCACAGGGCACATGGAATTCGTGGTGTAGCGGTGAAATGCTTAGATATCAC<br/> GAAGAACTCCGATTGCGAAGGCAGCACACTAATCCGTAAGTACGCTTCATGCTCGAAAGTGTGGGTATC<br/> AAACAGGATTAGAAACCTAGTAGTCC</p>       |
| OTU949  | <p>GTGAGGAATATTGGTCAATGGGCGAGAGCCTGAACCAGCCAAGTAGCGTGAGGGATGACCGCCCTACGG<br/> GTCGTAAACCTCTTTTATAAGGGAATAAAGATAAGTACGCGTACTTAGTTGCATGTACCTTATGAATAAGC<br/> ATCGGCTAATCCGTGCCAGCAGCCCGGTAATACGGAGGATGCGAGCGTTATCCGGATTTATTGGGTTT<br/> AAAGGGAGCGCAGACGGGACTTTAAGTCAGCTGTGAAATTTCCGGCTCAACCGGAAACTGCAGTTG<br/> ATACTGGCGTCTTGAGTACGGTCGAGGCAGGCGGAATTCGTGGTGTAGCGGTGAAATGCTTAGATATCA<br/> CGAAGAACCCGATTGCGAAGGCAGCCTGCCAGACCGCAACTGACGTTTATGCTCGAAAGTGTGGGTATC<br/> CAAACAGGATTAGAAACCTAGTAGTCC</p>  |
| OTU1264 | <p>GTGAGGAATATTGGTCAATGGGCGATAGCCTGAACCAGCCAAGTAGCGTGCAGGATGACGGCCCTATGG<br/> GTTGTAAACTGCTTTTGCAGGAGGATAAAGTGCCACAGTGTGGGGTTTTGCAGGTATCCTGCAATAA<br/> GGACCGGCTAATCCGTGCCAGCAGCCCGGTAATACGGAAGGTCCGGCGTTATCCGGATTTATTGGGT<br/> TTAAAGGGAGCGTAGGGGGCTTCAAGTCAGCTGTGAAAAGCTGCCGCTCAACGGCAGTCGTGCAGT<br/> TGAAACTGGATGCTTGAGTTCGCACGAGGTGAGTGAATTTGTGGTGTAGCGGTGAAATGCTTAGATAT<br/> CACAAAGAACTCCGATTGCGAAGGCAGCTGTCCGGAGCGAAACTGACGCTGAGGCTCGAAGGTGCGGG<br/> TATCAAACAGGATTAGATACCCCGTAGTCC</p>      |
| OTU1302 | <p>GTGAGGAATATTGGTCAATGGTCGGCAGACTGAACCAGCCAAGTCGCTGAGGGAAGACGGCCCTACG<br/> GGTTGTAAACCTCTTTTGTGCGAGAGTAAAGTACGCTACGTGTAGCGTATTGCAAGTATCCGAAGAAAA<br/> GCATCGGCTAATCCGTGCCAGCAGCCCGGTAATACGGAGGATGCGAGCGTTATCCGGATTTATTGGGT<br/> TTAAAGGGAGCGCAGACGGTCTGTTAAGTCAGCTGTGAAAAGTTGGGGCTCAACCTAAAATTGCAGTT<br/> GATACTGGCGTCTTGAGTTCGGTGTAGGTGTGCGGAATTCGTGGTGTAGCGGTGAAATGCTTAGATATC<br/> ACGAAGAACTCCGATTGCGAAGGCAGCACACTAATCCGTAAGTACGTTTATGCTCGAAAGTGTGGGT<br/> TCAAACAGGATTAGATACCCTAGTAGTCC</p>    |
| OTU675  | <p>GTGAGGAATATTGGTCAATGGGCGTAAAGCCTGAACCAGCCAAGTCGCTGAGGGATGAAGGTTCTATGG<br/> ATCGTAAACCTCTTTTATAAGGGAATAAAGTCCGGACGTGTCGGTTTTGTATGTACCTTATGAATAAGG<br/> ATCGGCTAATCCGTGCCAGCAGCCCGGTAATACGGAGGATCCGAGCGTTATCCGGATTTATTGGGTTT</p>                                                                                                                                                                                                                                                                   |

|         |                                                                                                                                                                                                                                                                                                                                                                                                                                                                                                         |
|---------|---------------------------------------------------------------------------------------------------------------------------------------------------------------------------------------------------------------------------------------------------------------------------------------------------------------------------------------------------------------------------------------------------------------------------------------------------------------------------------------------------------|
|         | <p>AAAGGGTGCGTAGGCGGCACGCCAAGTCAGCGGTGAAATTTCCGGGCTCAACCCGACTGTGCCGTTG<br/> AAACTGGCGAGCTAGAGTGCACAAGAGGCAGGCGGAATGCGTGGTGTAGCGGTGAAATGCATAGATATC<br/> ACGCAGAACCCCGATTGCGAAGGCAGCCTGCTAGGGTGCACAGACGCTGAGGCACGAAAGCGTGGGT<br/> ATCGAACAGGATTAGAAACCCCTAGTAGTCC</p>                                                                                                                                                                                                                                     |
| OTU625  | <p>GTGAGGAATATTGGTCAATGGGCGTAAGCCTGAACCAGCCAAGTCGCGTGAGGGATGAAGGTTCTATGG<br/> ATCGTAAACCTCTTTTATAAGGGAATAAAGTGTGGGACGTGTCCTGTTTGTATGTACCTTATGAATAAGG<br/> ATCGGCTAACTCCGTGCCAGCAGCCGCGTAATACGGAGGATCCGAGCGTTATCCGATTATTGGGTTT<br/> AAAGGGTGCGTAGGCGGTTGTTAAGTCAGTTGTGAAAGTTTGGGCTCAACCGTAAAATTGCAGTTGA<br/> TACTGGCGACCTTGTAGTGCAACAGAGGTAGGCGGAATTCGTGGTGTAGCGGTGAAATGCTTAGATATCAC<br/> GAAGAACTCCGATTGCGAAGGCAGCTTACTGGATTGTAAGTACGCTGATGCTCGAAAGTGTGGGTATC<br/> AAACAGGATTAGAAACCCCTAGTAGTCC</p>     |
| OTU215  | <p>GTGAGGAATATTGGTCAATGGCCGAGAGGCTGAACCAGCCAAGTCGCGTGAAGGAAGAAGGATCTATG<br/> GTTTGTAACCTCTTTTATAAGGGAATAAAGTGGAGGACGTGTCCTTTTGTATGTACCTTATGAATAAG<br/> CATCGGCTAACTCCGTGCCAGCAGCCGCGTAATACGGAGGATGCGAGCGTTATCCGATTATTGGGTT<br/> TAAAGGGTGCGTAGGCGGTTTAGTAAGTCAGCGGTGAAATTTGGTGCTAACACCAAACGTGCCGTTG<br/> ATACTGCTGGGCTAGAGAGTAGTTGCGGTAGGCGGAATGTATGGTGTAGCGGTGAAATGCTTAGAGATCA<br/> TACAGAACACCGATTGCGAAGGCAGCTTACCAAATATATCTGACGTTGAGGCACGAAAGCGTGGGGAG<br/> CAAACAGGATTAGAAACCCGAGTAGTCC</p>         |
| OTU850  | <p>GTGAGGAATATTGGTCAATGGGCGAGAGCCTGAACCAGCCAAGTAGCGTGAAGGATGACTGCCCTATGG<br/> GTTTGTAACCTCTTTTATAAGGGAATAAAGTCCGGTATGGATACCCGTTTGCATGTACTTTATGAATAAGG<br/> ATCGGCTAACTCCGTGCCAGCAGCCGCGTAATACGGAGGATCCGAGCGTTATCCGATTATTGGGTTT<br/> AAAGGGTGCGTAGGCGGCCTTTAAGTCAGCGGTGAAAGTCTGTGGCTCAACCATAGAATTGCCGTTGA<br/> AACTGGGGGCTTGTAGTATGTTTGTAGGCAGGCGGAATGCGTGGTGTAGCGGTGAAATGCTTAGATATCA<br/> CGCAGAACCCCGATTGCGAAGGCAGCCTGCCAAGCCATGACTGACGCTGATGCACGAAAGCGTGGGGGA<br/> TCAAACAGGATTAGAAACCCCTAGTAGTCC</p> |
| OTU809  | <p>GTGAGGAATATTGGTCAATGGCCGAGAGGCTGAACCAGCCAAGTAGCGTGCAGGATGACGGCCCTCCGG<br/> GTTTGTAACCTGCTTTTATAGTTGGGAATAAAGGCGGGACGTGTCGCGTATTGTATGTACCATCAGAAAA<br/> AGGACCCGCTAATCCGTGCCAGCAGCCGCGTAATACGGAAGTCCGGCGTTATCCGATTATTGGG<br/> TTTAAAGGGAGCGTAGGCGGCTGAAAAGTCAGTTGTGAAAGTTCGGGGCTCAACCTCGGAATTGCAG<br/> TTGAACTGTCAGTCTTGTAGTTCACGCAGGGCGCTGGAATTCATGGTGTAGCGGTGAAATGCTTAGATA<br/> TCACGAAGAACTCCGATTGCGAAGGCAGCACACTAAGCCGTAAGTACGCTTATGCTCGAAAGTGTGGG<br/> TATCAAACAGGATTAGAAACCCCTAGTAGTCC</p>      |
| OTU1266 | <p>GTGAGGAATATTGGTCAATGGACGAGAGTCTGAACCAGCCAAGTAGCGTGCAGGATGACGGCCCTATGG<br/> GTTTGTAACCTGCTTTTATAAGGGAATAAAGTGTAGTCTCGTGAGACTTTTGCATGTACCTTATGAATAAGG<br/> ACCGGCTAATCCGTGCCAGCAGCCGCGTAATACGGAAGTCCGGCGTTATCCGATTATTGGGTTT<br/> AAAGGGTGCGTAGGCGGAAGAATAAGTCAGCGGTGAAATGCTTACGCTCAACTGGAGAATTGCCGATG<br/> AAACTGTTTTCTAGAGTATAAAAAGGATGCGGAATGCGTGGTGTAGCGGTGAAATGCATAGATATCA<br/> CGCAGAACCCCGATTGCGAAGGCAGCATACTGGGCTATAACTGACGCTGAAGCACGAAAGCGTGGGTAT<br/> CGAACAGGATTAGAAACCCCTAGTAGTCC</p>       |
| OTU716  | <p>GTGAGGAATATTGGTCAATGGGCGAGAGCCTGAACCAGCCAAGTAGCGTGCAGGATGACGGCCCTATGG<br/> GTTTGTAACCTGCTTTTATAAGGGAATAAAGTGTAGTCTCGTGAGACTTTTGCATGTACCTTATGAATAAGG<br/> ACCGGCTAATCCGTGCCAGCAGCCGCGTAATACGGAAGTCCGGCGTTATCCGATTATTGGGTTT<br/> AAAGGGAGCGTAGGCGGCTTTAAGTCAGCGGTCAAATGCCACGGCTCAACCGTGGCCAGCCGTTGA<br/> AACTGCAAGCCTTGTAGTGTGCACAGGACACATGGAATTCGTGGTGTAGCGGTGAAATGCTTAGATATCAC</p>                                                                                                                   |

|                        |         |                                                                                                                                                                                                                                                                                                                                                                                                                                                                |
|------------------------|---------|----------------------------------------------------------------------------------------------------------------------------------------------------------------------------------------------------------------------------------------------------------------------------------------------------------------------------------------------------------------------------------------------------------------------------------------------------------------|
|                        |         | GAAGAACTCCGATTGCGAAGGCAGCTCACTGGAGCGCAACTGACGCTGAAGCTCGAAAAGTGCGGGTATCGAACAGGATTAGATACCCCTAGTAGTCC                                                                                                                                                                                                                                                                                                                                                             |
| Fusobacteriaceae_unc   | OTU947  | GTGGGAATATTGGACAATGGACAAAAGTCTGATCCAGCAATCTGTGTGCACGATGAAGTTTTTCGGAATGTAAAGTGCTTTCAGTTGGGAAGAAGAAAGTGACGGTACCAACAGAAGAAGCGACGGTAAATACGTGCCAGCAGCCGGTAATACGTATGTCGAAGCGTTATCCGGATTTATTGGGCGTAAAGCGCGTCTAGCCGGTTGGTAAGTCTGATGTGAAAATCGGGGCTCAACTCCGTATTGCGTTGGAAAAGTCCAAACTAGAGTACTGGAGAGGTAGGCGGAAGTACAAGTGTAGAGGTGAAATTCGTAGATATTTGTAGGAATGCCGATGGGAAGCCAGCCTACTGGACAGATACTGACGCTAAAGCGCGAAAGCGTGGGTAGCAAACAGGATTAGAAACCCAGTAGTCC                              |
|                        | OTU801  | GTGAGGAATATTGGTCAATGGACGAGAGTCTGAACCAGCCAAGTAGCGTGAAGGATGACTGCCCTATGGTTGTAAACTTCTTTATATGGGAATAAAGTATTCCACGTGTGGATTTGTATGTACCATATGAATAAGGATCGGCTAACTCCGTGCCAGCAGCCCGGTAATACGGAGGATCCGAGCGTTATCCGGATTTATTGGGCGTAAGCGCGTCTAGGCGGTTAGTAAGTCTGATGTGAAAATCGGGGCTCAACCCCGTATTGCGTTGGAAACTGCTAACTAGAGTACTGGAGAGGTAGGCGGAACTACAAGTGTAGAGGTGAAATTCGTAGATATTTGTAGGAATGCCGATGGGAAGCCAGCCTACTGGACAGATACTGACGCTAAAGCGCGAAAGCGTGGGTAGCAACAGGATTAGAAAACCCCTAGTAGTCC            |
| Streptococcus_sobrinus | OTU574  | GTAGGAATCTTCGGCAATGGACGCAAGTCTGACCGAGCAACGCCGCGTGAAGGATGAGTGAAGCGGTTTTTCGGATCGTAAAGCTCTGTTGTAGGGGAAGAACGTGTGTAAGAGTGGAAAGCTTACACAGTGACGGTACCCTAACAGAAAGGGACGGCTAACTACGTGCCAGCAGCCCGGTAATACGTAGGTCCCGAGCGTTGTCGGATTATTGGGCGTAAAGGGAGCGCAGGCGGTTAGTAAGTCTGAAGTTAAAGGCATTGGCTAACCAATGTATGCTTTGGAAACTGTTAGACTGAGTGCAGAAGGGGAGAGTGAATCCATGTGTAGCGGTGAAATGCGTAGATATGGAGGAACACCGGTGGCGAAAGCGGCTCTCTGGTCTGCTACTGACGCTGAGGCTCGAAAGCGTGGGTAGCGAACAGGATTAGATACCCCTGTAGTCC |
| Bacillus_fumarioli     | OTU1018 | GTAGGAATCTTCACAATGGACGAAAGTCTGATGGAGCAACGCCGCGTGAAGGATGAAGGCCCTTCGGTTCGTAAAGCTCTGTTGTAGGGGAAGAACAAGTACCGGAGTAACTGCCGGTACCTTGACGGTACCTAACAGAAAGCCACGGTAACTACGTGCCAGCAGCCCGGTAATACGTAGGTGGCAAGCGTTGTCGGGAATTTGGGCGTAAAGCGCGCAGGCGGCTTTAAGTCTGATGTGAAAGCCACGGCTCAACCGTGGAGGTGTCATTGGAAACTGGGGACTTGAGTGCAGAAGAGGAAAGCGGAATCCACGTGTAGCGGTGAAATGCGTAGAGATGTGGAGGAACACCAAGTGGCGAAGCGGCTTTCTGGTCTGTAAGTACGCTGAGGCGCGAAAGCGTGGGAGCAAACAGGATTAGAAAACCCCTAGTAGTCC         |
| Victivallaceae_unc     | OTU910  | GTCGAGAATCTTGGCAATGCGCGAAAGCGTGACCCAGCAATGCCGCGTGTGTGATGAAGGCCCTTCGGTTCGTAAAGCACTGTCTCCCGTGACGAAATTTGACGGTAGCGGGGAAGGAAGCCACGGCTAACTACGTGCAGCAGCCCGGTAATACGTAGGTGGCGAGCGTTGTTCCGATTTATTGGGCGTAAAGGGTCTGTAGGAGGTTTCGTTAAATACGAGGTGAAATCCCGAAGCTCAACTTCGAACTGCCTGTAGACTGACGGACTAGAGTACCGGAGAGGTAAGCGGAATACCAGGTGTAGCGGTGGAATGCGTAGATATCTGGTAGAACCAATAGCGAAGGCAGCTTGTGGACGGAAGTACTGCTGAAAGACGAAAGCATGGGGAGCAAACAGGATTAGATACCCCTAGTAGTCC                           |
|                        | OTU778  | GTCGAGAATCTTGGCAATGCGCGAAAGCGTGACCCAGCAATGCCGCGTGCATGATGAAGGCCCTTCGGTTCGTAAAATGCTGTCTCCCGTGACGAATAATGACGGTAGCGGGGAAGGAAGCCACGGTAACTACGTGCAGCAGCCCGGTAATACGTAGGTGGCGAGCGTTGTTCCGATTTATTGGGCGTAAAGGGTCTGTAGGAGGTTTGTAAATACGAGGTGAAATCCGGGGCTCAACTTCGAATTGCCTTGTAGACTGATGAACTAGAGTACTGGAGAGGTAAGCGGAATACCAGGTGTAGCGGTGGAATGCGTAGATATCTGGTAGAACCAATAGCGAAGGCAGCTTGTGGACAGAAACTGACTCTGAAAGACGAAAGCATGGGGAGCAAACAGGATTAGATACCCCGTAGTCC                               |

**File S2 The characteristic sequences of 13 OTU-based markers**

| OTU ID                                 | Characteristic sequences                                                                                                                                                                                                                                                                                                                                                                                                                                                             |
|----------------------------------------|--------------------------------------------------------------------------------------------------------------------------------------------------------------------------------------------------------------------------------------------------------------------------------------------------------------------------------------------------------------------------------------------------------------------------------------------------------------------------------------|
| OTU1002:<br><i>Bacteroides_unc</i>     | GTGAGGAATATTGGTCAATGGGCGCAGGCCTGAACCAGCCAAGTAGCGTGAAGGATGACTGC<br>CCTATGGGTTGTAAACTTCTTTTATATGGGAATAAAGTTTTCCACGTGTGGAATTTGTATGTAC<br>CATATGAATAAGGATCGGCTAACTCCGTGCCAGCAGCCGCGTAATACGGAGGATCCGAGCGT<br>TATCCGGATTATTGGGTTAAAGGGAAGCGTAGGTGGACAGTTAAGTCAGTTGTGAAAGTTTGC<br>GGCTCAACCGTAAAATTGCAGTTGATACTGGCTGTCTTGAGTACAGTAGAGGTGGGCGGAATT<br>CGTGGTGTAGCGGTGAAATGCTTAGATATCACGAAGAAGCTCCGATTGCGAAGGCAGCTCACTG<br>GACTGCAACTGACTGATGCTCGAAAGTGTGGGTATCAAACAGGATTAGAAACCTAGTAGT<br>CC |
| OTU1063:<br><i>Blautia_unc</i>         | GTGGGGAATATTGCACAATGGGGAAACCTGATGCAGCGACGCCGCGTGAAGGAAGAAGTA<br>TCTCGGTATGTAACTTCTATCAGCAGGGAAGATAGTGACGGTACCTGACTAAGAAGCCCCGG<br>CTAACACTCGTGCCAGCAGCCGCGTAATACGTAGGGGCAAGCGTTATCCGGATTACTGGGT<br>GTAAAGGGAGCGTAGACGGTGTGGCAAGTCTGATGTGAAAGGCATGGGCTCAACCTGTGGAC<br>TGCATTGGAACTGTCATACTTGAGTGCCGGAGGGTAAGCGGAATTCCTAGTGTAGCGGTGA<br>AATGCGTAGATATTAGGAGGAACACCAGTGGCGAAGGCGGCTTACTGGACGGTAACTGACGTT<br>GAGGCTCGAAAGCGTGGGGAGCAAACAGGATTAGATACCCTAGTAGTCC                           |
| OTU1100:<br><i>Lachnospiraceae_unc</i> | GTGGGGAATATTGCACAATGGGGAAACCTGATGCAGCGACGCCGCGTGAAGGAAGAAGTA<br>TCTCGGTATGTAACTTCTATCAGCAGGGAAGATAGTGACGGTACCTGACTAAGAAGCCCCGG<br>CTAACACTCGTGCCAGCAGCCGCGTAATACGTAGGGGCAAGCGTTATCCGGATTACTGGGT<br>GTAAAGGGAGCGTAGACGGTGTGGCAAGTCTGATGTGAAAGGCATGGGCTCAACCTGTGGAC<br>TGCATTGGAACTGTCATACTTGAGTGCCGGAGGGTAAGCGGAATTCCTAGTGTAGCGGTGA<br>AATGCGTAGATATTAGGAGGAACACCAGTGGCGAAGGCGGCTTACTGGACGGTAACTGACGTT<br>GAGGCTCGAAAGCGTGGGGAGCAAACAGGATTAGATACCCTAGTAGTCC                           |
| OTU1222:<br><i>Clostridium_unc</i>     | GTGGGGAATATTGCGCAATGGGGCAACCTGACGCAGCAACGCCGCGTGAGGGAAGAAGGT<br>CTTCGGATTGTAACTGTTGTCGCAAGGGAAGAAGACAGTGACGGTACCTTGTGAGAAAGTC<br>ACGGCTAACTACGTGCCAGCAGCCGCGTAATACGTAGGTGACAAGCGTTGTCGGATTACT<br>GGGTGTAAAGGGCGCGTAGGCGGACTGTCAAGTCAGTCGTGAAATACGGGGCTTAACCCCG<br>GGGCTGCGATTGAACTGACAGCCTTGAGTATCGGAGAGGAAAGCGGAATTCCTAGTGTAGC<br>GGTGAAATGCGTAGATATTAGGAGGAACACCAGTGGCGAAGGCGGCTTCTGACGACAACCT<br>GACGCTGAGGCGCAAAGTGTGGGGAGCAAACAGGATTAGAAACCCTAGTAGTCC                           |
| OTU1283:<br><i>Roseburia faecis</i>    | GTGGGGAATATTGCACAATGGGCGAAAGCCTGATGCAGCGACGCCGCGTGAGCGAAGAAGTA<br>TTTCGGTATGTAAAGCTCTATCAGCAGGGAAGATAATGACGGTACCTGACTAAGAAGCACCGG<br>CTAATAACGTGCCAGCAGCCGCGTAATACGTATGGTGAAGCGTTATCCGGATTACTGGGTG<br>TAAAGGGAGCGCAGGCGGTGCGGCAAGTCTGATGTGAAAGCCCGGGCTCAACCCCGTACT<br>GCATTGGAACTGTCGTAAGTGTGCGAGGGGTAAGCGGAATTCCTAGTGTAGCGGTGAA<br>ATGCGTAGATATTAGGAGGAACACCAGTGGCGAAGGCGGCTTACTGGACGATAACTGACGCTG<br>AGGCTCGAAAGCGTGGGGAGCAAACAGGATTAGAAACCCTAGTAGTCC                              |
| OTU1285:<br><i>Ruminococcus bromii</i> | GTGGGGGATATTGCGCAATGGGGCAACCTGACGCAGCAACGCCGCGTGAAGGATGAAGGT<br>TTTCGGATTGTAACTTCTTTTATTAAGGACGAAAATGACGGTACTTAATGAATAAGCTCCGG<br>CTAACACTCGTGCCAGCAGCCGCGTAATACGTAGGGAGCAAGCGTTGTCCGGATTACTGGGT<br>GTAAAGGGTGCCTAGGCGGCTTGTCAAGTCAAGTGTGAAATCTATGGGCTCAACCCATAAACT<br>GCATTTGAACTGTAGAGCTTGAGTGAAGTAGAGGCAGGCGGAATCCCCGTGTAGCGGTGA<br>AATGCGTAGAGATGGGGAGGAACACCAGTGGCGAAGGCGGCTGCTGGGCTTAACTGACGC                                                                                  |

|                                           |                                                                                                                                                                                                                                                                                                                                                                                                                                                                                            |
|-------------------------------------------|--------------------------------------------------------------------------------------------------------------------------------------------------------------------------------------------------------------------------------------------------------------------------------------------------------------------------------------------------------------------------------------------------------------------------------------------------------------------------------------------|
|                                           | TGAGGCACGAAAGCGTGGGTAGCAAACAAGGATTAGAAACCCTAGTAGTCC                                                                                                                                                                                                                                                                                                                                                                                                                                        |
| OTU1353:<br>Veillonella dispar            | GTGGGGAATCTTCCGCAATGGACGAAAGTCTGACGGAGCAACGCCCGTGAGTGATGACGGC<br>CTTCGGGTGTAAAGCTCTGTTAATCGGGACGAAAGGCCCTTCTTGCGAATAGTTAGAAGGAT<br>GACGGTACCGGAATAGAAAAGCCACGGCTAACTACGTGCCAGCAGCCCGGTAATACGTAGGTG<br>GCAAGCGTTGTCCGGAATTATTGGGCGTAAAGCGCGCGCAGGCGGATTGGTCAGTCTGTCTTA<br>AAAAGTTCGGGGCTTAACCCCGTGATGGGATGGAAACTGCCAATCTAGAGTATCGGAGAGGAA<br>AGTGAATTCCTAGTGTAGCGGTGAAATGCGTAGATATTAGGAAGAACACCAAGTGGCGAAGGC<br>GACTTTCGGACGAAAAGTACGCTGAGGCGGAAAGCCAGGGGAGCGAACGGGATTAGAA<br>ACCCTAGTAGTCC |
| OTU14:<br>Faecalibacterium<br>prausnitzii | GTGGGGAATATTGCACAATGGGGGAAACCCTGATGCAGCGACGCCCGTGAGGGAAGAAGGT<br>CTTCGGATTGTAAACTCTGTTGTTGAGGAAGATAATGACGGTACTCAACAAGGAAGTACGG<br>CTAACTACGTGCCAGCAGCCCGGTAACCGTAGGTCACAAGCGTTGTCCGGAATTAAGGGT<br>GTAAAGGGAGCGCAGGCGGGAAGACAAGTGGAAAGTGAATCCATGGGCTCAACCCATGAAC<br>TGCTTCAAAACTGTTTTCTTGAGTAGTGCAGAGGTAGGCGGAATCCCGGTGTAGCGGTGG<br>AATGCGTAGATATCGGAGGAACACCAAGTGGCGAAGGCGGCTACTGGGCACCAACTGACGC<br>TGAGGCTCGAAAGTGTGGGTAGCAAACAGGATTAGAAACCCTAGTAGTCC                                     |
| OTU163:<br>Blautia_unc                    | GTGAGGAATATTGGTCAATGGGCGAGAGCCTGAACCAGCCAAGTAGCGTGAAGGATGACTGC<br>CCATAGGGTGTAAACTCTTTTATAAAGGAATAAAGTCGGGTATGGATACCCGTTTGCATGTAC<br>TTTATGAATAAGGATCGGTAACCTCCGTGCCAGCAGCCCGGTAATACGGAGGATCCGAGCGT<br>TATCCGATTTATTGGGTTAAAGGGAGCGTAGATGGATGTTAAGTCAGTTGTGAAAGTTTGC<br>GGCTCAACCGTAAAATTGCAGTTGATACTGGATATCTTGAGTGCAGTTGAGGCAGGCGGAAT<br>CGTGGTGTAGCGGTGAAATGCTTAGATATCACGAAGAACTCCGATTGCGAAGGCAGCCTGCTA<br>AGCTGCAACTGACATTGAGGCTCGAAAGTGTGGGTATCAAACAGGATTAGAAACCCTAGTAGT<br>CC         |
| OTU236:<br>Clostridiales_unc              | GTGGGGAATATTGCACAATGGGGGAAACCCTGATGCAGCGACGCCCGTGAGTGAAGAAGTA<br>TTTCGGTATGTAAAGCTCTATCAGCAGGGAAGAAAGTACGGTACCTGAATAAGAAGCCCCGG<br>CTAACTACGTGCCAGCAGCCCGGTAATACGTAGGGGCAAGCGTTATCCGGATTACTGGGT<br>GTAAAGGGAGCGTAGACGGCAAGCAAGTCTGAAGTGAAGCCCGGTGCTTAAACCGGGA<br>CTGCTTTGAAAAGTGTGGTGGAGTGCAGGAGAGGTAAGCGGAATTCCTAGTGTAGCGGTG<br>AAATGCGTAGATATTAGGAAGAACACCAAGTGGCGAAGGCGGCTTACTGGACGGTAACTGACGT<br>TGAGGCTCGAAAGCGTGGGAGCAAACAGGATTAGAAACCCTAGTAGTCC                                     |
| OTU312:<br>Balutia_unc                    | GTGGGGAATATTGCACAATGGGGGAAACCCTGATGCAGCGACGCCCGTGAAAGGAAGAAGTA<br>TCTCGGTATGTAAACTCTATCAGCAGGGAAGATAGTACGGTACCTGACTAAGAAGCCCCGG<br>CTAACTACGTGCCAGCAGCCCGGTAATACGTAGGGGCAAGCGTTATCCGGATTACTGGGT<br>GTAAAGGGAGCGTAGACGGTGTGCAAGTCTGATGTGAAAGGCATGGGCTCAACCTGTGGAC<br>TGCAATTGAAAAGTGCATACTTGAAGTGCAGGAGGGGTAAGCGGAATTCCTAGTGTAGCGGTGA<br>AATGCGTAGATATTAGGAGGAACACCAAGTGGCGAAGGCGGCTTACTGGACGGTAACTGACGTT<br>GAGGCTCGAAAGCGTGGGAGCAAACAGGATTAGAAACCCTAGTAGTCC                               |
| OTU358:<br>Erysipelotrichaceae_unc        | GTAGGGAATTTTCGGCAATGGGGGAAACCCTGACCGAGCAACGCCCGTGAAAGGAAGAAGTA<br>ATTGTTATGTAAACTTCTGTATAGAGGAAGAAGCGTGGATATAGGGAATGATATCCAAGTGA<br>CGGTACTCTATAAGAAAAGCCACGGCTAACTACGTGCCAGCAGCCCGGTAATACGTAGGTGGC<br>GAGCGTTATCCGGAATATTGGGCGTAAAGAGGGAGCAGGCGGCACTAAGGGTCTGTGGTGA<br>AAGATCGAAGCTTAACTTCGGTAAGCCATGGAACCGTAGAGCTAGAGTGTGTGAGAGGATC<br>GTGGAATTCATGTGTAGCGGTGAAATGCGTAGATATAGGAGGAACACCAAGTGGCGAAGGCG                                                                                    |

|                                                            |                                                                                                                                                                                                                                                                                                                                                                                                                                                                                           |
|------------------------------------------------------------|-------------------------------------------------------------------------------------------------------------------------------------------------------------------------------------------------------------------------------------------------------------------------------------------------------------------------------------------------------------------------------------------------------------------------------------------------------------------------------------------|
|                                                            | ACGATCTGGCGCATAACTGACGCTCAGTCCCGAAAGCGTGGGGAGCAAATAGGATTAGAAAC<br>CCTAGTAGTCC                                                                                                                                                                                                                                                                                                                                                                                                             |
| OTU786:<br><i>Streptococcus infantis</i>                   | GTAGGGAATCTTCGCAATGGACGGAAGTCTGACCGAGCAACGCCGCGTGAAGTGAAGAAGGT<br>TTTCGGATCGTAAAGCTCTGTTGTAAGAGAAGAACGAGTGTGAGAGTGGAAAGTTCACACTG<br>TGACGGTATCTTACCAGAAAGGGACGGCTAACTACGTGCCAGCAGCCGCGGTAATACGTAGGT<br>CCCGAGCGTTGTCCGGATTATTGGGCGTAAAGCGAGCGCAGGCGGTTAGATAAGTCTGAAAGT<br>TAAAGGCTGTGGCTTAACCATAGTACGCTTTGGAACTGTTAACTTGAGTGCAAGAGGGGAG<br>AGTGAATTCCATGTGTAGCGGTGAAATGCGTAGATATATGGAGAACACCGGTGGCGAAAGC<br>GGCTCTCTGGCTTGTAAGTACGCTGAGGCTCGAAAGCGTGGGGAGCAAACAGGATTAGAAA<br>CCCTAGTAGTCC |
| OTU888:<br><i>Bacteria_unc</i>                             | GTGGGGAATATTGGACAATGGACCAAAAAGTCTGATCCAGCAATTCTGTGTGCACGTGAAGTT<br>TTTCGGAAATGTAAGTCTTTCAGTTGGGACGAAGTAAAGTACCGGTACCAACAGAAGAAGCG<br>ACGGCTAAATACGTGCCAGCAGCCGCGGTAATACGTAGGTGGCGAGCGTGTCCGGAATTATT<br>GGGCGTAAAGAGCATGTAGGGCGCTTAATAAGTCGAGCGTAAAAATGCGGGGCTCAACCCCG<br>TATGGCGCTGGAAGTGTAGGCTTGAGTGCAGGAGAGGAAAGGGGAATCCCAGTGTAGCG<br>GTGAAATGCGTAGATATTGGGAGGAACACCAGTGGCGAAGGCGCCTTCTGGACTGTGTCTGA<br>CGCTGAGATGCGAAAGCCAGGTTAGCGAACGGGATTAGAAAACCCGAGTAGTCC                          |
| OTU890:<br><i>Enterobacteriaceae_unc</i>                   | GTGGGGAATATTGCACAATGGGCGCAAGCCTGATGCAGCCATGCCGCGTGTATGAAGAAGGCC<br>TTTCGGTGTGTAAGTACTTTCAGCGGGGAGGAAGGGAGTAAAGTTAATACCTTTGCTCATTGA<br>CGTTACCCGCAAGAAGCACCAGGTAATCCGTGCCAGCAGCCGCGGTAATACGGAGGGTG<br>CAAGCGTAAATCGGAATTAAGGCGTAAAGCGCACGAGCGGTTGTAAAGTCAGATGTGA<br>AATCCCCGGGCTCAACCTGGGAACTGCATCTGATACTGGCAAGCTTGAGTCTCGTAGAGGGGG<br>GTAGAATCCAGGTGTAGCGGTGAAATGCGTAGAGATCTGGAGGAATACCGGTGGCGAAGGC<br>GGCCCCCTGGACGAAGACTGACGCTCAGGTGCGAAAGCGTGGGGAGCAAACAGGATTAGAA<br>ACCCTAGTAGTCC     |
| OTU939:<br><i>Bacteroides_f_Bacteroi<br/>daceae ovatus</i> | GTGAGGAATATTGGTCAATGGGCGCAGGCTGAACCAGCCAAGTAGCGTGAAGGATGAAGGC<br>TCTATGGGTGTAAGTCTTTTATATGGGAATAAAGTTTTCCACGTGTGGAATTTGTATGTAC<br>CATATGAATAAGGATCGGCTAACTCCGTGCCAGCAGCCGCGGTAATACGGAGGATCCGAGCGT<br>TATCCGGATTTATTGGGTTAAAGGGAGCGTAGGTGGATTGTTAAGTCAGTTGTGAAAGTTGC<br>GGCTCAACCGTAAAATTGCAGTTGAAACTGGCAGTCTTGTAGTACAGTAGAGGTGGGCGGAATT<br>CGTGGTGTAGCGGTGAAATGCTTAGATATCACGAAGAAGTCCGATTGCGAAGGCAGCTCACTA<br>GACTGTTACTGACACTGATGCTCGAAAGTGTGGGTATCAAACAGGATTAGAAAACCTAGTAGT<br>CC       |
| OUT818:<br><i>Bacteroides_unc</i>                          | GTGAGGAATATTGGTCAATGGGCGCAGGCTGAACCAGCCAAGTAGCGTGAAGGATGACTGC<br>CCTATGGGTGTAAGTCTTTTATATGGGAATAAAGTTTTCCACGTGTGGAATTTGTATGTAC<br>CATATGAATAAGGATCGGCTAACTCCGTGCCAGCAGCCGCGGTAATACGGAGGATCCGAGCGT<br>TATCCGGATTTATTGGGTTAAAGGGAGCGTAGGTGGACAGTTAAGTCAGTTGTGAAAGTTGC<br>GGCTCAACCGTAAAATTGCAGTTGATACTGGCTGTCTTGTAGTACAGTAGAGGTGGGCGGAATT<br>CGTGGTGTAGCGGTGAAATGCTTAGATATCACGAAGAAGTCCGATTGCGAAGGCAGCTCACTG<br>GACTGCAACTGACACTGATGCTCGAAAGTGTGGGTATCAAACAGGATTAGATAACCTAGTAGT<br>CC       |
